# Supplementary material for: C5a Activates a Pro-Inflammatory Gene Expression Profile in Human Gaucher iPSC-Derived Macrophages
Source: MDPI journal article supplement (doi:10.3390/ijms22189912), 2021-09-14
Supplement: s1 [file s1]

**Supplemental Figure S1: Marker analysis of iPSC-derived macrophages.** Flow Cytometry analysis of control and GD macrophages using antibodies against CD-14 and CD-68 after 7 days in differentiation media (See Materials and Methods), red: isotype controls, blue, reactive antibodies.

**Supplemental Figure S2. There is no difference in Fc-gamma receptor-dependent or Complement receptor-mediated phagocytosis between the GD and control macrophages.** Fc-gamma receptor-dependent phagocytosis (left) and complement receptor-mediated phagocytosis (right) were assayed as described in the Materials & Methods ( $n=3$ ; ns=not significant).

**Supplemental Table S1.** Cell lines used in this study.

**Supplemental Table S2.** Primer sets used for qRT-PCR analysis

**Supplemental Tables S3A, S3B, S3C, and S3D. Gene array analysis.** Gene array analysis shows differential gene expression between **(A)** unstimulated GD vs. unstimulated control macrophages **(B)** GD-C5a vs. control-C5a macrophages incubated with rC5a (30 nM) for 4 h **(C)** unstimulated control vs. control-C5a **(D)** unstimulated GD vs. GD-C5a. Supplemental Tables 3A, 3B, 3C, and 3D are presented as Excel files in Supplementary information.

**Supplemental Tables S4A, S4B, S4C, and S4D. Gene Ontology (GO) analysis.** GO analysis of **(A)** unstimulated GD vs. unstimulated control macrophages, **(B)** GD-C5a vs. control-C5a macrophages, **(C)** unstimulated control vs. control-C5a, **(D)** unstimulated GD vs. GD-C5a. Supplemental Tables 4A, 4B, 4C, and 4D are presented as Excel files in Supplementary information.
