# Supplementary material for: C5a Activates a Pro-Inflammatory Gene Expression Profile in Human Gaucher iPSC-Derived Macrophages
Source: MDPI journal article supplement (doi:10.3390/ijms22189912), 2021-09-14
Supplement: s1 [file s1]

| Transcript Name | Primers, forward and Reverse     | Expected size (bp), ref |
|-----------------|----------------------------------|-------------------------|
| Human GAPDH_for | 5'- GTCGCTGTTGAAGTCAGAGG -3'     | 289, [69]               |
| Human GAPDH_rev | 5'- GAAACTGTGGCGTGATGG -3'       |                         |
| Human TNF_for   | 5'- CACTTTGGAGTGATCGGCC -3'      | 144, [14]               |
| Human TNF_rev   | 5'- CTCAGCTTGAGGGTTTGCTACAAC -3' |                         |
| Human DKK2_for  | 5'- AGTACCCGCTGCAATAATGG -3'     | 243, [70]               |
| Human DKK2_rev  | 5'- GAAATGACGAGCACAGCAAA -3'     |                         |
| Human FOS_for   | 5'- CTGGCGTTGTGAAGACCAT -3'      | 109, [71]               |
| Human FOS_rev   | 5'- TCCCTTCGGATTCTCCTTTT -3'     |                         |
| Human GPNMB_for | 5'- TCCAGATGACAGACGTCCTGATG -3'  | 135, [72]               |
| Human GPNMB_rev | 5'- TCTGGGTGATCTCGCAGGTG -3'     |                         |
| Human CAT_for   | 5'- TAAGACTGACCAGGGCATC -3'      | 201, [73]               |
| Human CAT_rev   | 5'- CAAACCTTGGTGAGATCGAA -3'     |                         |
