# Supplementary material for: C5a Activates a Pro-Inflammatory Gene Expression Profile in Human Gaucher iPSC-Derived Macrophages
Source: MDPI journal article supplement (doi:10.3390/ijms22189912), 2021-09-14
Supplement: s1 [file s1]

| Types     | Name of hiPSCs used | Genotypes             |
|-----------|---------------------|-----------------------|
| Control a | DF4-7T.A            | WT                    |
| Control b | MJiPSC              | WT                    |
| Type 2 GD | MNG-10-257          | L444P/Rec <i>Ncil</i> |
