# Supplementary material for: C5a Activates a Pro-Inflammatory Gene Expression Profile in Human Gaucher iPSC-Derived Macrophages
Source: Int J Mol Sci. 2021 Sep 14;22(18):9912. doi: 10.3390/ijms22189912 (PMC8466165; doi:10.3390/ijms22189912)
Supplement: Supplementary file 1 [file ijms-22-09912-s001.zip]

Archive with 13 entries (13 files):
- ijms-1310008 Supplemental Figure and Table titles, and Figure and Table legends.pdf
- Suppl Figure S1.pdf
- Suppl Figure S2.pdf
- Supplemental Table S1.pdf
- Supplemental Table S2.pdf
- Supplemental Table S3A.xlsx
- Supplemental Table S3B.xlsx
- Supplemental Table S3C.xlsx
- Supplemental Table S3D.xlsx
- Supplemental Table S4A.xls
- Supplemental Table S4B.xls
- Supplemental Table S4C.xls
- Supplemental Table S4D.xls
