# Supplementary material for: C5a Activates a Pro-Inflammatory Gene Expression Profile in Human Gaucher iPSC-Derived Macrophages
Source: Int J Mol Sci. 2021 Sep 14;22(18):9912. doi: 10.3390/ijms22189912 (PMC8466165; doi:10.3390/ijms22189912)
Supplement: Supplementary file 1 [file ijms-22-09912-s001.zip › Supplemental Table S3A.xlsx]

## Sheet: Sheet1
ClariomTM S Assay Transcript Cluster (TC) ID	unstimulated control Avg (log2)	unstimulated GD Avg (log2)	Fold Change	P-val	Gene Symbol	Description
TC0800012143.hg.1	4.3	8.39	-16.99	7.51e-08	NAPRT	nicotinate phosphoribosyltransferase
TC2000007942.hg.1	6.55	10.52	-15.69	1.29e-07	FAM217B	family with sequence similarity 217, member B
TC1500010744.hg.1	9.07	4.85	18.64	3.39e-07	GCOM1; MYZAP; POLR2M	GRINL1A complex locus 1; myocardial zonula adherens protein; polymerase (RNA) II (DNA directed) polypeptide M
TC1200008346.hg.1	3.13	6.8	-12.68	4.11e-07	ALX1	ALX homeobox 1
TC1100007257.hg.1	11.35	8.01	10.12	4.6e-07	CAT	catalase
TC0100008637.hg.1	7.08	10.75	-12.74	4.66e-07	TCTEX1D1	Tctex1 domain containing 1
TC0600013205.hg.1	11.63	6.11	45.86	5.29e-07	VNN2	vanin 2
TC0900008425.hg.1	5.91	8.55	-6.24	1.51e-06	ZNF483	zinc finger protein 483
TC0100015211.hg.1	9.33	6.06	9.63	1.88e-06	GSTM3	glutathione S-transferase mu 3 (brain)
TC2100007852.hg.1	4.44	7.84	-10.56	3.34e-06	RWDD2B	RWD domain containing 2B
TC1200012417.hg.1	4.34	8.91	-23.79	3.54e-06	SLC15A4	solute carrier family 15 (oligopeptide transporter), member 4
TC0300012815.hg.1	7.26	9.4	-4.4	3.61e-06	P2RY13	purinergic receptor P2Y, G-protein coupled, 13
TC0200014361.hg.1	8.32	5.16	8.95	3.99e-06	LYPD1	LY6/PLAUR domain containing 1
TC1000008054.hg.1	11.85	9.48	5.16	4.02e-06	PLAU	plasminogen activator, urokinase
TC0300006483.hg.1	9.16	6.25	7.49	4.22e-06	BHLHE40	basic helix-loop-helix family, member e40
TC0700006913.hg.1	17.21	15.05	4.47	4.28e-06	GPNMB	glycoprotein (transmembrane) nmb
TC2000009674.hg.1	5.38	7.43	-4.14	5.76e-06	PPP1R3D	protein phosphatase 1, regulatory subunit 3D
TC1400007860.hg.1	9.32	6.28	8.24	7.41e-06	FLRT2	fibronectin leucine rich transmembrane protein 2
TC0200014764.hg.1	10.36	8.27	4.28	7.83e-06	DPP4	dipeptidyl-peptidase 4
TC0300012935.hg.1	8.12	5.55	5.94	7.99e-06	SHOX2	short stature homeobox 2
TC0900008776.hg.1	9.14	6.16	7.92	1.07e-05	MVB12B	multivesicular body subunit 12B
TC0700013368.hg.1	6.05	9.05	-8.01	1.08e-05	ZNF736	zinc finger protein 736
TC1500010737.hg.1	7.47	12.05	-23.91	1.1e-05	SQRDL	sulfide quinone reductase-like (yeast)
TC0100015750.hg.1	6.58	8.51	-3.79	1.31e-05	HORMAD1	HORMA domain containing 1
TC1100009533.hg.1	8.29	5.68	6.09	1.36e-05	ADAMTS15	ADAM metallopeptidase with thrombospondin type 1 motif 15
TC0800006439.hg.1	4.53	6.38	-3.62	1.68e-05	ZNF596	zinc finger protein 596
TC0400009090.hg.1	7.78	10.39	-6.13	1.7e-05	TDO2	tryptophan 2,3-dioxygenase
TC1700010358.hg.1	9.15	6.45	6.47	1.71e-05	MYO1D	myosin ID
TC1900009684.hg.1	11.87	8.83	8.27	1.8e-05	ACP5	acid phosphatase 5, tartrate resistant
TC0300013146.hg.1	9.33	11.77	-5.41	1.81e-05	TNFSF10	tumor necrosis factor (ligand) superfamily, member 10
TC0600007650.hg.1	11.89	7.53	20.53	1.87e-05	HLA-DRA	major histocompatibility complex, class II, DR alpha
TC0100015192.hg.1	6.01	7.79	-3.43	2.27e-05	PSRC1	proline/serine-rich coiled-coil 1
TC0600011517.hg.1	7.73	4.35	10.41	2.28e-05	HLA-DPA1	major histocompatibility complex, class II, DP alpha 1
TC0600014273.hg.1	10.48	6.42	16.62	2.37e-05	HLA-DRB1	major histocompatibility complex, class II, DR beta 1
TC0500008229.hg.1	8.94	6.72	4.66	2.4e-05	PAM	peptidylglycine alpha-amidating monooxygenase
TC0200008663.hg.1	10.33	5.66	25.4	2.43e-05	IL1R2	interleukin 1 receptor, type II
TC0200007115.hg.1	8.68	5.92	6.75	2.54e-05	CLIP4	CAP-GLY domain containing linker protein family, member 4
TC0200011062.hg.1	7.32	5.67	3.13	2.57e-05	B3GNT7	UDP-GlcNAc:betaGal beta-1,3-N-acetylglucosaminyltransferase 7
TC0300012676.hg.1	6.36	8.18	-3.53	2.65e-05	PCOLCE2	procollagen C-endopeptidase enhancer 2
TC0400010609.hg.1	5.82	7.42	-3.03	2.65e-05	CORIN	corin, serine peptidase
TC0600012123.hg.1	8.89	6.12	6.81	2.85e-05	DST	dystonin
TC1900008885.hg.1	7.96	4.66	9.81	3.51e-05	NLRP2	NLR family, pyrin domain containing 2
TC1000011114.hg.1	9.5	6.73	6.8	3.54e-05	KCNMA1	potassium channel, calcium activated large conductance subfamily M alpha, member 1
TC0200014204.hg.1	8.93	7.35	2.98	3.58e-05	HS6ST1	heparan sulfate 6-O-sulfotransferase 1
TC0400010258.hg.1	9.19	7.05	4.4	3.88e-05	LGI2	leucine-rich repeat LGI family, member 2
TC0X00008836.hg.1	7.05	5.47	2.99	3.92e-05	PLXNA3	plexin A3
TC1500010707.hg.1	8.26	10.37	-4.33	4.27e-05	ARHGAP11B	Rho GTPase activating protein 11B
TC2100007208.hg.1	9.81	12.75	-7.65	4.29e-05	MX1	MX dynamin-like GTPase 1
TC1900011057.hg.1	5.11	7.48	-5.17	4.57e-05	PLA2G4C	phospholipase A2, group IVC (cytosolic, calcium-independent)
TC0100008752.hg.1	5.46	8.72	-9.56	4.81e-05	TYW3	tRNA-yW synthesizing protein 3 homolog (S. cerevisiae)
TC0600011491.hg.1	6.78	5.05	3.31	4.89e-05	HLA-DRB5	major histocompatibility complex, class II, DR beta 5
TC0600007387.hg.1	4.3	6	-3.24	5.34e-05	OR2B6	olfactory receptor, family 2, subfamily B, member 6
TC0900008202.hg.1	13.52	11.75	3.42	5.7e-05	TGFBR1	transforming growth factor, beta receptor 1
TC1800008628.hg.1	7.73	6.03	3.26	5.86e-05	ZBTB7C	zinc finger and BTB domain containing 7C
TC1100013015.hg.1	10.96	13.3	-5.04	5.91e-05	MS4A14	membrane-spanning 4-domains, subfamily A, member 14
TC1700007677.hg.1	7.84	5.88	3.87	7.01e-05	DUSP14	dual specificity phosphatase 14
TC1400006741.hg.1	6.99	4.53	5.5	7.25e-05	NYNRIN	NYN domain and retroviral integrase containing
TC1200008845.hg.1	5.91	7.58	-3.18	7.27e-05	RAD9B	RAD9 checkpoint clamp component B
TC0100009333.hg.1	7.05	8.85	-3.48	7.68e-05	GPSM2	G-protein signaling modulator 2
TC1300009597.hg.1	6.14	7.55	-2.66	8.15e-05	GPR18	G protein-coupled receptor 18
TC2200007672.hg.1	11.76	10.04	3.3	8.21e-05	GRAMD4	GRAM domain containing 4
TC2000006622.hg.1	7.45	9.38	-3.8	8.29e-05	C20orf196	chromosome 20 open reading frame 196
TC0800012371.hg.1	7.26	9.96	-6.47	8.36e-05	LY6E	lymphocyte antigen 6 complex, locus E
TC2100008555.hg.1	8.89	10.34	-2.74	8.53e-05	TIAM1	T-cell lymphoma invasion and metastasis 1
TC1900011259.hg.1	10.25	6.89	10.28	8.66e-05	SIGLEC12	sialic acid binding Ig-like lectin 12 (gene/pseudogene)
TC0200010284.hg.1	8.59	6.66	3.82	8.66e-05	MYO1B	myosin IB
TC0100014612.hg.1	3.61	6.74	-8.73	8.89e-05	CRYZ	crystallin zeta
TC0900010971.hg.1	8.95	6.06	7.42	8.98e-05	TBC1D2	TBC1 domain family, member 2
TC2000007830.hg.1	8.45	6.82	3.09	9.21e-05	TFAP2C	transcription factor AP-2 gamma (activating enhancer binding protein 2 gamma)
TSUnmapped00000255.hg.1	7.5	9.18	-3.21	9.78e-05	KIF15	kinesin family member 15
TC0400010519.hg.1	8.88	6.54	5.07	9.87e-05	APBB2	amyloid beta (A4) precursor protein-binding, family B, member 2
TC1400008752.hg.1	5.84	7.91	-4.2	0.0001	CIDEB	cell death-inducing DFFA-like effector b
TC0800011887.hg.1	11.35	9.37	3.96	0.0001	ST3GAL1	ST3 beta-galactoside alpha-2,3-sialyltransferase 1
TC0100007136.hg.1	9.15	6.73	5.32	0.0001	IGSF21	immunoglobin superfamily, member 21
TC1100009514.hg.1	7.35	5.03	4.98	0.0001	TMEM45B	transmembrane protein 45B
TC0700012299.hg.1	7.49	9.18	-3.21	0.0001	GPR85	G protein-coupled receptor 85
TC0600007677.hg.1	9.34	6.77	5.95	0.0001	HLA-DPB1	major histocompatibility complex, class II, DP beta 1
TC0400010733.hg.1	7.61	4.89	6.56	0.0001	KDR	kinase insert domain receptor
TC1500009737.hg.1	4.58	7.24	-6.32	0.0001	PPIB	Jeck2013 ALT_ACCEPTOR, ALT_DONOR, coding, INTERNAL, intronic, OVERLAPTX, OVEXON best transcript NM_000942
TC1100011083.hg.1	10.9	8.24	6.3	0.0001	AHNAK	AHNAK nucleoprotein
TC0700009536.hg.1	7.32	5.85	2.79	0.0001	ARHGEF5	Rho guanine nucleotide exchange factor 5
TC0100018403.hg.1	11.75	10.36	2.61	0.0001	ERRFI1	ERBB receptor feedback inhibitor 1
TC0300011943.hg.1	9.43	10.79	-2.57	0.0001	KIAA1524	KIAA1524
TC2000007091.hg.1	5.45	4.13	2.49	0.0001	MYLK2	myosin light chain kinase 2
TC1200011786.hg.1	8.86	7.01	3.62	0.0002	NUAK1	NUAK family, SNF1-like kinase, 1
TC1400009194.hg.1	10.88	9.42	2.76	0.0002	FERMT2	fermitin family member 2
TC0300009412.hg.1	6.93	5.28	3.15	0.0002	SERPINI1	serpin peptidase inhibitor, clade I (neuroserpin), member 1
TC0300010399.hg.1	10.66	8.97	3.22	0.0002	SH3BP5	SH3-domain binding protein 5 (BTK-associated)
TC1200007559.hg.1	6.36	8.22	-3.63	0.0002	TROAP	trophinin associated protein
TC0800008146.hg.1	6.39	7.78	-2.62	0.0002	WWP1	Transcript Identified by AceView, Entrez Gene ID(s) 11059
TC1200011002.hg.1	7.05	8.95	-3.73	0.0002	LRIG3	leucine-rich repeats and immunoglobulin-like domains 3
TC0600007158.hg.1	8.9	7.35	2.94	0.0002	SOX4	SRY box 4
TC0500013342.hg.1	12.27	13.56	-2.44	0.0002	ERAP1	endoplasmic reticulum aminopeptidase 1
TC1300007248.hg.1	11.83	13.12	-2.45	0.0002	CKAP2	cytoskeleton associated protein 2
TC1900011801.hg.1	12.4	10.08	5.02	0.0002	LILRB4	leukocyte immunoglobulin-like receptor, subfamily B (with TM and ITIM domains), member 4
TC0400007556.hg.1	13.93	12.28	3.13	0.0002	SRD5A3	steroid 5 alpha-reductase 3
TC0800011533.hg.1	6.18	7.7	-2.87	0.0002	TRPS1	Transcript Identified by AceView, Entrez Gene ID(s) 7227
TC0700010257.hg.1	10.59	9.26	2.51	0.0002	ICA1	islet cell autoantigen 1
TC1100006598.hg.1	10.06	7.43	6.17	0.0002	SLC22A18	solute carrier family 22, member 18
TC1800008333.hg.1	9.9	11.89	-3.96	0.0002	DHFR; DHFRP1	dihydrofolate reductase; dihydrofolate reductase pseudogene 1
TC0300008536.hg.1	6.73	8.15	-2.68	0.0002	EAF2	ELL associated factor 2
TC0100017145.hg.1	7.68	6.51	2.24	0.0002	PLXNA2	plexin A2
TC0100008607.hg.1	6.51	5.04	2.78	0.0002	RAVER2	ribonucleoprotein, PTB-binding 2
TC0400011616.hg.1	5.6	7.34	-3.36	0.0002	TIFA	TRAF-interacting protein with forkhead-associated domain
TC0200014610.hg.1	10.21	11.32	-2.15	0.0002	NMI	N-myc (and STAT) interactor
TC0100014910.hg.1	5.98	4.18	3.48	0.0002	TGFBR3	transforming growth factor beta receptor III
TC1400007595.hg.1	9.49	7.11	5.21	0.0002	SIPA1L1	signal-induced proliferation-associated 1 like 1
TC0700012731.hg.1	5.69	4.45	2.37	0.0002	DGKI	diacylglycerol kinase, iota
TC0300009524.hg.1	9	10.18	-2.26	0.0002	ECT2	epithelial cell transforming 2
TC1700010426.hg.1	5.64	7.65	-4.02	0.0002	SLFN13	schlafen family member 13
TC0300007606.hg.1	10.32	9.12	2.29	0.0002	ABHD6	abhydrolase domain containing 6
TC0600009795.hg.1	6.16	7.65	-2.82	0.0002	SUMO4	small ubiquitin-like modifier 4
TC0500011758.hg.1	6.41	8.09	-3.21	0.0002	CDO1	cysteine dioxygenase type 1
TC2100006784.hg.1	6.34	9.06	-6.55	0.0002	JAM2	junctional adhesion molecule 2
TC1700012276.hg.1	10.79	11.94	-2.22	0.0002	PNPO	pyridoxamine 5-phosphate oxidase
TC2000008940.hg.1	3	4.17	-2.26	0.0002	PIGU	Salzman2013 ALT_ACCEPTOR, ALT_DONOR, coding, INTERNAL, intronic best transcript NM_080476
TC1900010334.hg.1	6.82	5.13	3.23	0.0003	TSHZ3	teashirt zinc finger homeobox 3
TC0200011503.hg.1	10.07	8.71	2.57	0.0003	PXDN	peroxidasin
TC1700009613.hg.1	9.94	12.7	-6.77	0.0003	ASGR2	asialoglycoprotein receptor 2
TSUnmapped00000267.hg.1	8.02	6.77	2.38	0.0003	LRP6	LDL receptor related protein 6
TC1600009580.hg.1	11.55	10.01	2.9	0.0003	XYLT1	xylosyltransferase I
TC1900010286.hg.1	11.48	10.18	2.46	0.0003	UQCRFS1	ubiquinol-cytochrome c reductase, Rieske iron-sulfur polypeptide 1
TC0800012087.hg.1	4.81	6.28	-2.77	0.0003	LYNX1	Ly6/neurotoxin 1
TC2100006982.hg.1	4.61	6.71	-4.27	0.0003	LINC00649	long intergenic non-protein coding RNA 649
TC1200011870.hg.1	11.38	10.29	2.14	0.0003	KCTD10	potassium channel tetramerization domain containing 10
TC0800008371.hg.1	5.25	7.01	-3.39	0.0003	SPAG1	sperm associated antigen 1
TC0100016431.hg.1	5.68	4.36	2.5	0.0003	TNFSF4	tumor necrosis factor (ligand) superfamily, member 4
TC0100007206.hg.1	5.04	2.57	5.56	0.0003	CDA	cytidine deaminase
TC0X00009025.hg.1	9.11	12.46	-10.17	0.0003	ANOS1	anosmin 1
TC0X00011198.hg.1	12.03	10.9	2.19	0.0003	DNASE1L1	deoxyribonuclease I-like 1
TC0100017216.hg.1	8.83	10.68	-3.6	0.0003	NEK2	NIMA-related kinase 2
TC1000008435.hg.1	8.78	10.3	-2.88	0.0003	HECTD2	HECT domain containing E3 ubiquitin protein ligase 2
TC2000009058.hg.1	9.29	7.49	3.49	0.0003	TGM2	transglutaminase 2
TC1500010929.hg.1	8.5	6.6	3.72	0.0003	FAM174B	family with sequence similarity 174, member B
TC0700011977.hg.1	11.27	9.63	3.12	0.0003	GAL3ST4	galactose-3-O-sulfotransferase 4
TC1900008597.hg.1	9.48	7.92	2.95	0.0003	CLEC11A	C-type lectin domain family 11, member A
TC1700012340.hg.1	7.03	8.17	-2.21	0.0003	NUP88	nucleoporin 88kDa
TC0100018360.hg.1	6.13	7.6	-2.77	0.0003	DISC1	disrupted in schizophrenia 1
TC0300014081.hg.1	13.69	12.51	2.27	0.0003	TMEM41A	transmembrane protein 41A
TC1100012131.hg.1	8.38	11.37	-7.89	0.0004	MMP1	matrix metallopeptidase 1
TC0100010939.hg.1	8.9	10.2	-2.47	0.0004	PLA2G4A	phospholipase A2, group IVA (cytosolic, calcium-dependent)
TC0100016065.hg.1	6.9	8.23	-2.51	0.0004	CD1B	CD1b molecule
TC1000009104.hg.1	9.45	6.93	5.75	0.0004	PLPP4	phospholipid phosphatase 4
TC0700013581.hg.1	4.89	6.75	-3.63	0.0004	STEAP4	STEAP family member 4
TC1900007025.hg.1	7.92	6.11	3.52	0.0004	PLPPR2	phospholipid phosphatase related 2
TC1200010006.hg.1	12.02	13.05	-2.04	0.0004	PLBD1	phospholipase B domain containing 1
TC0900008318.hg.1	8.7	9.83	-2.2	0.0004	TMEM38B	transmembrane protein 38B
TC0200011624.hg.1	8.1	10.07	-3.92	0.0004	CMPK2	cytidine monophosphate (UMP-CMP) kinase 2, mitochondrial
TC0200016360.hg.1	11.86	10.79	2.1	0.0004	STK25	serine/threonine kinase 25
TSUnmapped00000703.hg.1	4.3	5.52	-2.33	0.0004	FMN1	formin 1
TC0100006773.hg.1	8.17	6.66	2.87	0.0004	SPSB1	splA/ryanodine receptor domain and SOCS box containing 1
TC0600009143.hg.1	15.31	14.02	2.46	0.0004	SLC16A10	solute carrier family 16 (aromatic amino acid transporter), member 10
TC2200009366.hg.1	6.75	7.82	-2.11	0.0004	CHKB-CPT1B	CHKB-CPT1B readthrough (NMD candidate)
TC1500008485.hg.1	8.97	7.41	2.95	0.0004	IGF1R	insulin-like growth factor 1 receptor
TC1800006589.hg.1	9.58	7.86	3.29	0.0004	PTPRM	protein tyrosine phosphatase, receptor type, M
TC1000007913.hg.1	8.57	6.45	4.34	0.0004	H2AFY2	H2A histone family, member Y2
TC0500010670.hg.1	8.9	7.49	2.65	0.0004	EMB	embigin
TC1900009838.hg.1	11.35	10.09	2.39	0.0004	ADGRE2	adhesion G protein-coupled receptor E2
TC0X00007267.hg.1	10.72	9.14	2.99	0.0005	MAGED1	MAGE family member D1
TC0100009364.hg.1	10.17	6.11	16.61	0.0005	CSF1	colony stimulating factor 1 (macrophage)
TC1100008797.hg.1	11.21	10.19	2.03	0.0005	PANX1	pannexin 1
TC1200010794.hg.1	10.7	11.79	-2.14	0.0005	ITGB7	integrin beta 7
TC0X00008002.hg.1	12.94	11.48	2.75	0.0005	NGFRAP1	nerve growth factor receptor (TNFRSF16) associated protein 1
TC0200012727.hg.1	8.04	9.19	-2.23	0.0005	PUS10	pseudouridylate synthase 10
TC0200016719.hg.1	10.53	9.46	2.09	0.0005	SNORD89; RNF149	small nucleolar RNA, C/D box 89; ring finger protein 149
TC1900011946.hg.1	7.02	6	2.02	0.0005	FBXO27	F-box protein 27
TC1200009800.hg.1	12.65	11.17	2.8	0.0005	SLC2A3	solute carrier family 2 (facilitated glucose transporter), member 3
TC0700012230.hg.1	7.11	5.51	3.04	0.0005	NRCAM	neuronal cell adhesion molecule
TC2100007274.hg.1	2.66	3.78	-2.17	0.0005	NDUFV3	Transcript Identified by AceView, Entrez Gene ID(s) 4731
TC1200006604.hg.1	14.98	12.71	4.83	0.0005	CD9	CD9 molecule
TC0400009221.hg.1	12.3	10.73	2.97	0.0005	MSMO1	methylsterol monooxygenase 1
TC0100015550.hg.1	9.22	11.44	-4.67	0.0005	FAM72C	family with sequence similarity 72, member C
TC0100015561.hg.1	8.86	9.96	-2.14	0.0005	NBPF15	neuroblastoma breakpoint family, member 15
TC1700012282.hg.1	7.61	6.39	2.32	0.0005	SPATA20	spermatogenesis associated 20
TC1500010369.hg.1	12.42	9.55	7.27	0.0005	MFGE8	milk fat globule-EGF factor 8 protein
TC0500007826.hg.1	13.46	12.26	2.3	0.0005	IQGAP2	IQ motif containing GTPase activating protein 2
TC1100010992.hg.1	8.75	6.51	4.73	0.0006	TCN1	transcobalamin I (vitamin B12 binding protein, R binder family)
TC1200011460.hg.1	6.86	5.05	3.5	0.0006	KITLG	KIT ligand
TC1300007718.hg.1	9.65	7.92	3.32	0.0006	GPC6	glypican 6
TC0800008478.hg.1	7.74	6.2	2.9	0.0006	FZD6	frizzled class receptor 6
TC1600011499.hg.1	9.24	10.55	-2.48	0.0006	ERI2	ERI1 exoribonuclease family member 2
TC1100012473.hg.1	7.33	8.56	-2.35	0.0006	MPZL3	myelin protein zero-like 3
TC0400008106.hg.1	8.02	9.75	-3.3	0.0006	HERC5	HECT and RLD domain containing E3 ubiquitin protein ligase 5
TC0100014849.hg.1	6.75	8.43	-3.21	0.0006	GBP3	guanylate binding protein 3
TC0500011146.hg.1	11.1	9.44	3.15	0.0006	ENC1	ectodermal-neural cortex 1 (with BTB domain)
TC1500006925.hg.1	14.94	9.65	39	0.0006	THBS1	thrombospondin 1
TC0100010218.hg.1	6.4	4.96	2.71	0.0006	KIRREL	kin of IRRE like (Drosophila)
TC0100008057.hg.1	10.72	12.59	-3.67	0.0006	CDC20	cell division cycle 20
TC0600007585.hg.1	12.1	13.21	-2.15	0.0006	MICB	MHC class I polypeptide-related sequence B
TC0900006881.hg.1	9.14	10.38	-2.37	0.0006	IFT74	intraflagellar transport 74
TC0200014834.hg.1	8.58	6.87	3.28	0.0006	STK39	serine threonine kinase 39
TC1200009796.hg.1	13.5	12	2.83	0.0006	SLC2A14	solute carrier family 2 (facilitated glucose transporter), member 14
TC1200008683.hg.1	14.35	12.75	3.04	0.0006	CHST11	carbohydrate (chondroitin 4) sulfotransferase 11
TC0300013827.hg.1	9.62	8.58	2.06	0.0006	WDR6	WD repeat domain 6
TC2000009970.hg.1	10.92	12.44	-2.88	0.0006	SIRPB1	signal-regulatory protein beta 1
TC0300010821.hg.1	7.19	8.33	-2.21	0.0006	ULK4	unc-51 like kinase 4
TC0100006675.hg.1	12.95	11.81	2.2	0.0006	KCNAB2	potassium channel, voltage gated subfamily A regulatory beta subunit 2
TC0X00010849.hg.1	7.84	5.43	5.3	0.0007	GPC4	glypican 4
TC0100011770.hg.1	11.39	9.29	4.28	0.0007	EPHX1	epoxide hydrolase 1, microsomal (xenobiotic)
TC0200008005.hg.1	8.23	9.67	-2.7	0.0007	DYSF	dysferlin
TC1600008991.hg.1	8.93	7.69	2.35	0.0007	LMF1	lipase maturation factor 1
TC0600008209.hg.1	7.18	8.33	-2.22	0.0007	CENPQ	centromere protein Q
TC1400009131.hg.1	10.14	8.95	2.28	0.0007	MAP4K5	mitogen-activated protein kinase kinase kinase kinase 5
TC0200014620.hg.1	6.57	7.79	-2.34	0.0007	CACNB4	calcium channel, voltage-dependent, beta 4 subunit
TC1000009296.hg.1	9.84	7.99	3.59	0.0007	PTPRE	protein tyrosine phosphatase, receptor type, E
TC1600009362.hg.1	8.29	7.23	2.08	0.0007	EMP2	epithelial membrane protein 2
TC1100006998.hg.1	12.89	11.71	2.27	0.0007	GTF2H1	general transcription factor IIH subunit 1
TC0600014110.hg.1	7.35	8.66	-2.48	0.0007	PSMB9	proteasome subunit beta 9
TC0100008874.hg.1	11.45	10.23	2.32	0.0007	PRKACB	protein kinase, cAMP-dependent, catalytic, beta
TC0100018045.hg.1	8.02	6.83	2.28	0.0007	SMYD3	SET and MYND domain containing 3
TC1500008514.hg.1	4.19	5.63	-2.71	0.0007	LRRC28	Transcript Identified by AceView, Entrez Gene ID(s) 123355
TC0700009678.hg.1	7.45	8.46	-2.01	0.0007	GIMAP2	GTPase, IMAP family member 2
TC1000007337.hg.1	8.52	9.67	-2.22	0.0007	ZNF37A	zinc finger protein 37A
TC0100016678.hg.1	10.85	12.08	-2.34	0.0007	FAM129A	family with sequence similarity 129, member A
TC0100016548.hg.1	11.2	9.96	2.36	0.0008	ABL2	ABL proto-oncogene 2, non-receptor tyrosine kinase
TC0600011121.hg.1	5.27	6.69	-2.68	0.0008	HIST1H1A	histone cluster 1, H1a
TC1500010709.hg.1	5.58	6.72	-2.2	0.0008	ARHGAP11B	Rho GTPase activating protein 11B
TC1900010538.hg.1	7.38	8.56	-2.26	0.0008	ZNF790	zinc finger protein 790
TC0400012874.hg.1	7.85	9.13	-2.43	0.0008	CYP4V2	cytochrome P450, family 4, subfamily V, polypeptide 2
TC0500011280.hg.1	12.1	13.89	-3.44	0.0008	DHFR	dihydrofolate reductase
TSUnmapped00000600.hg.1	7.06	8.17	-2.15	0.0008	SURF1	surfeit 1
TC0400012905.hg.1	8.8	7.8	2.01	0.0008	QDPR	quinoid dihydropteridine reductase
TC1900007012.hg.1	8.75	7.06	3.22	0.0008	LDLR; MIR6886	low density lipoprotein receptor; microRNA 6886
TC0900010586.hg.1	8.35	10.46	-4.3	0.0008	C9orf64	chromosome 9 open reading frame 64
TC0500013384.hg.1	5.71	4.42	2.44	0.0008	PPP2R2B	protein phosphatase 2, regulatory subunit B, beta
TC0600007265.hg.1	3.78	5.75	-3.94	0.0008	HIST1H3C	histone cluster 1, H3c
TC0600014109.hg.1	5.6	7.44	-3.6	0.0008	PSMB8-AS1	PSMB8 antisense RNA 1 (head to head)
TC0600011385.hg.1	2.82	4.23	-2.66	0.0008	FLOT1	Transcript Identified by AceView, Entrez Gene ID(s) 10211
TC0900012179.hg.1	12.37	11.17	2.29	0.0008	SPTAN1	spectrin, alpha, non-erythrocytic 1
TC1300009765.hg.1	7.77	6.71	2.08	0.0008	IRS2	insulin receptor substrate 2
TC1000010722.hg.1	5.46	4.17	2.44	0.0008	SLC16A9	solute carrier family 16, member 9
TC1100007216.hg.1	8.83	10.37	-2.9	0.0008	PRRG4	proline rich Gla (G-carboxyglutamic acid) 4 (transmembrane)
TC1900011029.hg.1	7.29	6.05	2.35	0.0008	MEIS3	Meis homeobox 3
TC1200010397.hg.1	11.01	12.34	-2.51	0.0008	CPNE8	copine VIII
TC0600008611.hg.1	2.47	3.8	-2.5	0.0008	SH3BGRL2	Transcript Identified by AceView, Entrez Gene ID(s) 83699
TC0300008839.hg.1	11.11	12.66	-2.93	0.0009	ACPP	acid phosphatase, prostate
TC1300009332.hg.1	4.05	5.9	-3.61	0.0009	RBM26	Transcript Identified by AceView, Entrez Gene ID(s) 64062
TC0800009735.hg.1	12.84	14.24	-2.64	0.0009	MTUS1	microtubule associated tumor suppressor 1
TC1100013221.hg.1	11.45	12.61	-2.23	0.0009	CASP1	caspase 1
TC1500010463.hg.1	11.7	12.96	-2.4	0.0009	PRC1	protein regulator of cytokinesis 1
TC1700012274.hg.1	8.1	6.48	3.08	0.0009	ITGB3	integrin beta 3
TC1700009293.hg.1	10.35	7.78	5.93	0.0009	METRNL	meteorin, glial cell differentiation regulator-like
TC0400011234.hg.1	3.63	4.96	-2.5	0.0009	MAPK10	mitogen-activated protein kinase 10
TC1900011271.hg.1	15.23	13.87	2.58	0.0009	FPR1	formyl peptide receptor 1
TC1100009287.hg.1	9.59	7.42	4.5	0.0009	ARHGEF12	Rho guanine nucleotide exchange factor (GEF) 12
TC1500007616.hg.1	6.34	7.9	-2.96	0.0009	ZWILCH	zwilch kinetochore protein
TC0100013349.hg.1	9.47	10.66	-2.28	0.0009	RSRP1	arginine/serine-rich protein 1
TC0300013408.hg.1	6.61	8.09	-2.79	0.0009	EHHADH	enoyl-CoA, hydratase/3-hydroxyacyl CoA dehydrogenase
TC0X00008514.hg.1	8.59	9.67	-2.11	0.0009	DDX26B	DEAD/H (Asp-Glu-Ala-Asp/His) box polypeptide 26B
TC0100007412.hg.1	8.54	7.28	2.4	0.001	MAN1C1	mannosidase, alpha, class 1C, member 1
TC1600011483.hg.1	14.29	12.66	3.09	0.001	LITAF	lipopolysaccharide-induced TNF factor
TC1000008056.hg.1	11.78	9.72	4.17	0.001	VCL	vinculin
TC0400012814.hg.1	5.39	6.42	-2.04	0.001	CXCL6	chemokine (C-X-C motif) ligand 6
TC1200009759.hg.1	6.58	8.36	-3.44	0.001	CDCA3	cell division cycle associated 3
TC1200012698.hg.1	9.8	8.68	2.17	0.001	CHPT1	choline phosphotransferase 1
TC0300011834.hg.1	13.15	12.05	2.15	0.001	FILIP1L	filamin A interacting protein 1-like
TC1200009587.hg.1	12.17	10.29	3.68	0.001	CACNA2D4	calcium channel, voltage-dependent, alpha 2/delta subunit 4
TC1200010023.hg.1	8.5	9.57	-2.1	0.001	ERP27	endoplasmic reticulum protein 27
TC1100011339.hg.1	5.28	6.57	-2.45	0.0011	CABP2	calcium binding protein 2
TC0600014086.hg.1	6.6	5.08	2.87	0.0011	ZNF391	zinc finger protein 391
TC0600011138.hg.1	10.99	12.48	-2.8	0.0011	HIST1H1D	histone cluster 1, H1d
TC0600011507.hg.1	8.65	10.17	-2.87	0.0011	PSMB8	proteasome subunit beta 8
TC0500007915.hg.1	7.14	8.19	-2.07	0.0011	FAM151B	family with sequence similarity 151, member B
TC0200016469.hg.1	11.9	13	-2.14	0.0011	ANXA4	annexin A4
TC0900009592.hg.1	10.95	11.96	-2.02	0.0011	PSIP1	PC4 and SFRS1 interacting protein 1
TC1300007164.hg.1	9.63	8.3	2.51	0.0011	SETDB2	SET domain, bifurcated 2
TC1100008236.hg.1	10.49	8.97	2.86	0.0011	CCND1	cyclin D1
TC0300008705.hg.1	8.24	9.33	-2.12	0.0011	ABTB1	ankyrin repeat and BTB (POZ) domain containing 1
TC0800011211.hg.1	8.86	7.73	2.18	0.0011	NIPAL2	NIPA-like domain containing 2
TC1300009348.hg.1	7.41	6.39	2.03	0.0012	SPRY2	sprouty RTK signaling antagonist 2
TC0900010968.hg.1	8.65	9.85	-2.31	0.0012	TRIM14	tripartite motif containing 14
TC0100008101.hg.1	9.58	11.22	-3.12	0.0012	KIF2C	kinesin family member 2C
TC1700010762.hg.1	13.47	11.68	3.46	0.0012	VAT1	vesicle amine transport 1
TC0200010545.hg.1	14.09	12.7	2.62	0.0012	NRP2	neuropilin 2
TC1000012577.hg.1	16.32	15.13	2.28	0.0012	LIPA	lipase A, lysosomal acid, cholesterol esterase
TC0600014264.hg.1	10.49	9.22	2.41	0.0012	DDAH2	dimethylarginine dimethylaminohydrolase 2
TC0600009831.hg.1	4.79	3.69	2.15	0.0012	PPP1R14C	protein phosphatase 1, regulatory (inhibitor) subunit 14C
TC0X00010329.hg.1	7.87	6.37	2.83	0.0012	TSPAN6	tetraspanin 6
TC1500008616.hg.1	8.56	9.89	-2.53	0.0012	HERC2P3	hect domain and RLD 2 pseudogene 3
TC1600007425.hg.1	9.74	11.1	-2.56	0.0012	KIF22	kinesin family member 22
TSUnmapped00000478.hg.1	5.18	3.64	2.9	0.0012	ZNF502	zinc finger protein 502
TC1700010686.hg.1	9.45	10.96	-2.86	0.0012	JUP	junction plakoglobin
TC1500010244.hg.1	4.02	5.11	-2.12	0.0013	AP3B2	adaptor-related protein complex 3, beta 2 subunit
TC0900006538.hg.1	8.4	9.52	-2.16	0.0013	JAK2	Janus kinase 2
TC1900010856.hg.1	13.58	11.38	4.58	0.0013	PLAUR	plasminogen activator, urokinase receptor
TC1700009043.hg.1	7.81	9.3	-2.8	0.0013	BIRC5	baculoviral IAP repeat containing 5
TC0200007717.hg.1	8.61	9.63	-2.04	0.0013	AHSA2	AHA1, activator of heat shock 90kDa protein ATPase homolog 2 (yeast)
TC0X00010198.hg.1	5.33	6.53	-2.3	0.0013	HDX	highly divergent homeobox
TC0100009723.hg.1	8.86	10.74	-3.67	0.0013	FAM72D	family with sequence similarity 72, member D
TC1700007585.hg.1	11.93	13.16	-2.35	0.0013	SLFN5	schlafen family member 5
TC0500013354.hg.1	11.25	9.77	2.81	0.0013	P4HA2	prolyl 4-hydroxylase, alpha polypeptide II
TC0300009869.hg.1	5.24	3.89	2.56	0.0013	PYDC2	pyrin domain containing 2
TC0500009676.hg.1	4.61	5.8	-2.27	0.0013	ZNF879	zinc finger protein 879
TC0400009137.hg.1	10.1	8.89	2.31	0.0013	FNIP2	folliculin interacting protein 2
TC0600010066.hg.1	11.86	10.64	2.33	0.0013	IGF2R	insulin-like growth factor 2 receptor
TC1200007801.hg.1	5.13	6.32	-2.28	0.0014	OR10P1	olfactory receptor, family 10, subfamily P, member 1
TC0500013271.hg.1	10.17	11.71	-2.91	0.0014	LOC728554; THOC3	THO complex 3 pseudogene; Homo sapiens THO complex 3, mRNA (cDNA clone MGC:5469 IMAGE:3451612), complete cds.; Homo sapiens THO complex 3, mRNA (cDNA clone MGC:87233 IMAGE:5262880), complete cds.; Salzman2013 ANNOTATED, INTERNAL, ncRNA, OVERLAPTX, OVEXON best transcript NR_003615; Transcript Identified by AceView, Entrez Gene ID(s) 728554
TSUnmapped00000606.hg.1	4.52	5.68	-2.25	0.0014	FMN1	formin 1
TC0100016963.hg.1	11.11	9.84	2.42	0.0014	KDM5B	lysine (K)-specific demethylase 5B
TC1700006546.hg.1	10.13	11.29	-2.24	0.0014	SRR	serine racemase
TC2200008874.hg.1	10.35	9.24	2.16	0.0014	NFAM1	NFAT activating protein with ITAM motif 1
TC1400010619.hg.1	15.78	14.63	2.22	0.0014	HIF1A	hypoxia inducible factor 1, alpha subunit (basic helix-loop-helix transcription factor)
TC2000007545.hg.1	8.07	6.86	2.32	0.0014	EYA2	EYA transcriptional coactivator and phosphatase 2
TC0600011125.hg.1	10.83	12.15	-2.5	0.0014	HIST1H2AB	histone cluster 1, H2ab
TC0700011147.hg.1	5.13	6.23	-2.14	0.0014	VOPP1	Jeck2013 ALT_ACCEPTOR, ALT_DONOR, coding, INTERNAL, intronic best transcript NM_030796
TC1100009078.hg.1	8.03	9.28	-2.39	0.0014	TTC12	tetratricopeptide repeat domain 12
TC1100011011.hg.1	4.08	5.49	-2.67	0.0014	PRPF19	Memczak2013 ALT_ACCEPTOR, ALT_DONOR, coding, INTERNAL, intronic best transcript NM_014502
TC1100010290.hg.1	9.98	11.45	-2.77	0.0015	E2F8	E2F transcription factor 8
TC0100006812.hg.1	10.42	8.97	2.73	0.0015	KIF1B	kinesin family member 1B
TC1400007201.hg.1	9.48	10.9	-2.68	0.0015	CDKN3	cyclin-dependent kinase inhibitor 3
TC1100007273.hg.1	14.05	12.99	2.09	0.0015	CD44	CD44 molecule (Indian blood group)
TC1700012207.hg.1	7.48	6.26	2.33	0.0015	EPN2; EPN2-IT1	epsin 2; EPN2 intronic transcript 1
TC0500012519.hg.1	15.85	14.63	2.32	0.0015	SPARC	secreted protein, acidic, cysteine-rich (osteonectin)
TC1200007251.hg.1	11.79	12.85	-2.08	0.0015	KIAA1551	KIAA1551
TC1700009333.hg.1	9.45	7.78	3.17	0.0015	NXN	nucleoredoxin
TC2000006755.hg.1	7.71	9.01	-2.47	0.0015	NDUFAF5	NADH dehydrogenase (ubiquinone) complex I, assembly factor 5
TC1500008757.hg.1	5.52	7.22	-3.24	0.0015	ATP10A	ATPase, class V, type 10A
TC1500007392.hg.1	10.21	11.5	-2.44	0.0015	CCNB2	cyclin B2
TC1800007091.hg.1	8.08	9.17	-2.12	0.0015	ELP2	elongator acetyltransferase complex subunit 2
TC1400006915.hg.1	4.25	5.38	-2.19	0.0015	BRMS1L	Transcript Identified by AceView, Entrez Gene ID(s) 84312
TC1200008113.hg.1	8.16	9.27	-2.15	0.0016	NUP107	nucleoporin 107kDa
TC0600007700.hg.1	10.25	11.82	-2.97	0.0016	KIFC1	kinesin family member C1
TC1500010890.hg.1	14.44	13.28	2.23	0.0016	HEXA	hexosaminidase A (alpha polypeptide)
TC1700009679.hg.1	8.39	9.82	-2.68	0.0016	AURKB	aurora kinase B
TC1300010006.hg.1	6.2	5.16	2.06	0.0016	MCF2L	MCF.2 cell line derived transforming sequence like
TC0200012009.hg.1	10.27	9.15	2.19	0.0016	DTNB	dystrobrevin beta
TC0700008450.hg.1	7.69	6.68	2.02	0.0016	LMTK2	lemur tyrosine kinase 2
TC0800009961.hg.1	7.37	5.22	4.43	0.0016	CLU; MIR6843	clusterin; microRNA 6843
TC1700010797.hg.1	4.02	5.08	-2.07	0.0016	SOST	sclerostin
TC1400008460.hg.1	4.56	5.63	-2.11	0.0016	PLD4	phospholipase D family, member 4
TC1200012807.hg.1	10.58	9.54	2.06	0.0016	STAC3	SH3 and cysteine rich domain 3
TC1600008427.hg.1	7.12	5.96	2.24	0.0016	ZNRF1	zinc and ring finger 1, E3 ubiquitin protein ligase
TC1900007458.hg.1	6.5	7.51	-2.01	0.0017	ZNF93	zinc finger protein 93
TSUnmapped00000392.hg.1	12.45	10.41	4.1	0.0017	FCGBP	Fc fragment of IgG binding protein
TC1000006652.hg.1	7.72	6.21	2.85	0.0017	PFKFB3	6-phosphofructo-2-kinase/fructose-2,6-biphosphatase 3
TC0900011388.hg.1	10.22	11.4	-2.26	0.0017	PHF19	PHD finger protein 19
TC1200010518.hg.1	14.79	13.77	2.03	0.0018	SLC38A2	solute carrier family 38, member 2
TC1900008755.hg.1	10.48	8.86	3.07	0.0018	ZNF331	zinc finger protein 331
TC1700011815.hg.1	9.44	10.59	-2.21	0.0018	MXRA7	matrix-remodelling associated 7
TC0400008985.hg.1	2.82	4.29	-2.78	0.0018	RPS3A	Zhang2013 ALT_DONOR, coding, INTERNAL, intronic best transcript NM_001006
TC1600009137.hg.1	11.06	9.88	2.27	0.0018	TCEB2	transcription elongation factor B (SIII), polypeptide 2 (18kDa, elongin B)
TC0100014685.hg.1	7.23	5.84	2.64	0.0018	ADGRL4	adhesion G protein-coupled receptor L4
TC1600009545.hg.1	5.42	6.46	-2.06	0.0018	ABCC6	ATP binding cassette subfamily C member 6
TC1200008920.hg.1	9.53	10.54	-2.02	0.0018	OAS3	2-5-oligoadenylate synthetase 3
TC0X00007274.hg.1	7.65	5.15	5.65	0.0018	MAGED4B; MAGED4; SNORA11D	melanoma antigen family D4B; melanoma antigen family D4; small nucleolar RNA, H/ACA box 11D
TC1600009829.hg.1	9.38	10.82	-2.71	0.0018	NSMCE1	NSE1 homolog, SMC5-SMC6 complex component
TSUnmapped00000290.hg.1	5.73	7.17	-2.73	0.0019	INPP5D	inositol polyphosphate-5-phosphatase D
TC1300008114.hg.1	5.5	6.59	-2.14	0.0019	CUL4A	Memczak2013 ALT_ACCEPTOR, ALT_DONOR, coding, INTERNAL, intronic best transcript NM_001008895
TC1700006729.hg.1	9.83	10.87	-2.05	0.0019	ACADVL	acyl-CoA dehydrogenase, very long chain
TC1900009208.hg.1	10.06	9	2.08	0.0019	AP3D1	adaptor-related protein complex 3, delta 1 subunit
TC1100011514.hg.1	12	10.23	3.41	0.0019	DHCR7	7-dehydrocholesterol reductase
TC0500012491.hg.1	5.33	6.51	-2.27	0.0019	ZNF300	zinc finger protein 300
TC0900010543.hg.1	7.03	5.83	2.29	0.002	TLE1	transducin-like enhancer of split 1 (E(sp1) homolog, Drosophila)
TC0X00007999.hg.1	9.53	8.47	2.08	0.002	BEX4	brain expressed X-linked 4
TC0500012238.hg.1	9.69	7.25	5.41	0.002	HBEGF	heparin-binding EGF-like growth factor
TC2000007089.hg.1	10.58	12.18	-3.01	0.002	TPX2	TPX2, microtubule-associated
TC1100008218.hg.1	9.36	8.28	2.12	0.002	TPCN2	two pore segment channel 2
TC0500008777.hg.1	10.54	12.24	-3.25	0.0021	KIF20A	kinesin family member 20A
TC1200011961.hg.1	7.58	8.62	-2.05	0.0021	TMEM116	transmembrane protein 116
TC0900008803.hg.1	7.02	6.02	2.01	0.0021	SLC2A8	solute carrier family 2 (facilitated glucose transporter), member 8
TC0X00008054.hg.1	7.34	5.24	4.29	0.0021	RNF128	ring finger protein 128, E3 ubiquitin protein ligase
TC1100008400.hg.1	4.13	3.11	2.03	0.0022	DNAJB13	DnaJ (Hsp40) homolog, subfamily B, member 13
TC1000006768.hg.1	8.43	9.56	-2.19	0.0022	CELF2	Transcript Identified by AceView, Entrez Gene ID(s) 10659
TC0600009381.hg.1	6.63	8.15	-2.88	0.0022	CENPW	centromere protein W
TC0600012656.hg.1	5.03	6.24	-2.32	0.0022	USP45	ubiquitin specific peptidase 45
TC0100014543.hg.1	8.72	10.08	-2.56	0.0022	DEPDC1	DEP domain containing 1
TC0100017113.hg.1	7	8.23	-2.34	0.0022	PIGR	polymeric immunoglobulin receptor
TC1500010715.hg.1	10.73	12.23	-2.84	0.0022	BUB1B	BUB1 mitotic checkpoint serine/threonine kinase B
TC1900009991.hg.1	8.08	9.23	-2.22	0.0022	JAK3	Janus kinase 3
TC1000006782.hg.1	6	7.2	-2.3	0.0022	ECHDC3	enoyl-CoA hydratase domain containing 3
TC1300009008.hg.1	9.5	8.48	2.02	0.0022	NEK3	NIMA-related kinase 3
TC1800007508.hg.1	5.89	7.47	-3	0.0022	TNFRSF11A	Transcript Identified by AceView, Entrez Gene ID(s) 8792
TC0100010140.hg.1	10.37	12.11	-3.34	0.0022	SYT11	synaptotagmin XI
TC0800012026.hg.1	6.94	5.52	2.68	0.0022	SLC45A4	solute carrier family 45, member 4
TC0500011725.hg.1	7.14	5.89	2.38	0.0023	MCC	mutated in colorectal cancers
TC0800007221.hg.1	6.03	4.76	2.4	0.0023	NRG1	neuregulin 1
TC0400012310.hg.1	12.97	13.99	-2.02	0.0023	MARCH1	membrane associated ring finger 1
TC0X00007936.hg.1	7.56	9.15	-3.01	0.0023	CENPI	centromere protein I
TC0100011012.hg.1	11.27	8.63	6.23	0.0023	RGS1	regulator of G-protein signaling 1
TC0600011127.hg.1	10.69	11.77	-2.11	0.0023	HIST1H1C	histone cluster 1, H1c
TC0200010447.hg.1	11.3	12.47	-2.25	0.0023	CASP8	caspase 8, apoptosis-related cysteine peptidase
TC1000011904.hg.1	6.62	4.34	4.87	0.0023	ABLIM1	actin binding LIM protein 1
TC0400007023.hg.1	6.46	7.84	-2.6	0.0023	PACRGL	PARK2 co-regulated like
TC1500010660.hg.1	9.33	7.14	4.55	0.0024	PCSK6	proprotein convertase subtilisin/kexin type 6
TC1200010842.hg.1	6.74	7.78	-2.04	0.0024	PPP1R1A	protein phosphatase 1, regulatory (inhibitor) subunit 1A
TC0100009064.hg.1	10.15	8.9	2.38	0.0024	FNBP1L	formin binding protein 1-like
TC2200008687.hg.1	10.54	9.49	2.07	0.0024	TMEM184B	transmembrane protein 184B
TC1200009734.hg.1	8.65	9.83	-2.26	0.0024	VAMP1	vesicle associated membrane protein 1
TC1200011140.hg.1	4.28	3.2	2.12	0.0024	GRIP1	glutamate receptor interacting protein 1
TC0100012278.hg.1	11.16	10.1	2.09	0.0024	SCCPDH	saccharopine dehydrogenase (putative)
TC1100012535.hg.1	6.66	5.58	2.13	0.0025	PVRL1	poliovirus receptor-related 1 (herpesvirus entry mediator C)
TC0400010682.hg.1	8.3	6.93	2.59	0.0025	SGCB	sarcoglycan beta
TC1900007400.hg.1	8.94	7.22	3.3	0.0025	KLHL26	kelch-like family member 26
TC0600014248.hg.1	5.13	6.4	-2.41	0.0025	HIST1H2BB	histone cluster 1, H2bb
TC2200007150.hg.1	11.17	8.18	7.95	0.0026	TIMP3	TIMP metallopeptidase inhibitor 3
TC1600007470.hg.1	11.47	13.32	-3.61	0.0026	ITGAL	integrin alpha L
TC1900010676.hg.1	11.2	9.59	3.04	0.0026	FCGBP	Fc fragment of IgG binding protein
TC0100010397.hg.1	9.33	10.53	-2.3	0.0026	NUF2	NUF2, NDC80 kinetochore complex component
TC0X00011121.hg.1	10.48	11.79	-2.48	0.0026	GABRE; MIR224; MIR452	gamma-aminobutyric acid (GABA) A receptor, epsilon; microRNA 224; microRNA 452
TC1900011382.hg.1	9.48	7.41	4.18	0.0026	MYADM	Memczak2013 ANTISENSE, CDS, coding, INTERNAL best transcript NM_001020819
TC0100015509.hg.1	9.59	11.17	-3	0.0026	FAM72B	family with sequence similarity 72, member B
TC1000011515.hg.1	9.87	11.12	-2.37	0.0026	BLNK	B-cell linker
TC1400006540.hg.1	12.95	14.23	-2.42	0.0026	RNASE2	ribonuclease, RNase A family, 2 (liver, eosinophil-derived neurotoxin)
TC1700006709.hg.1	6.67	8.58	-3.76	0.0027	XAF1	XIAP associated factor 1
TC0100010381.hg.1	9	7.9	2.14	0.0027	UAP1	UDP-N-acetylglucosamine pyrophosphorylase 1
TC1200007594.hg.1	7.66	5.16	5.68	0.0027	ASIC1	acid sensing ion channel 1
TC0X00006789.hg.1	10.51	9.47	2.05	0.0027	FAM3C2	FAM3C pseudogene
TC1800008977.hg.1	6.67	7.78	-2.16	0.0027	CD226	CD226 molecule
TC1000012580.hg.1	9.9	11.04	-2.2	0.0027	ARHGAP19	Rho GTPase activating protein 19
TC0700007198.hg.1	12.55	13.99	-2.72	0.0027	ANLN	anillin actin binding protein
TC1300006599.hg.1	4.9	3.64	2.39	0.0028	C1QTNF9B-AS1	C1QTNF9B antisense RNA 1
TC0X00011209.hg.1	6.81	7.84	-2.04	0.0028	FAM3A	family with sequence similarity 3, member A
TC2000006813.hg.1	8.26	10.17	-3.74	0.0028	MGME1	mitochondrial genome maintenance exonuclease 1
TC0300006477.hg.1	8.02	6.91	2.16	0.0029	ITPR1	inositol 1,4,5-trisphosphate receptor, type 1
TC1700010851.hg.1	7.83	9.11	-2.43	0.0029	KIF18B	kinesin family member 18B
TC0800011243.hg.1	4.72	5.94	-2.33	0.003	FBXO43	F-box protein 43
TC0100016018.hg.1	6.77	4.8	3.91	0.003	CRABP2	cellular retinoic acid binding protein 2
TC1000012482.hg.1	13.32	12.14	2.27	0.003	ENTPD1	ectonucleoside triphosphate diphosphohydrolase 1
TC0200010745.hg.1	7.77	6.23	2.89	0.003	IGFBP2	insulin like growth factor binding protein 2
TC0500008871.hg.1	5.86	4.82	2.06	0.003	PCDHA9; PCDHAC1; PCDHAC2; PCDHA1; PCDHA10; PCDHA11; PCDHA12; PCDHA13; PCDHA2; PCDHA3; PCDHA4; PCDHA5; PCDHA6; PCDHA7; PCDHA8; PCDHA14	protocadherin alpha 9; protocadherin alpha subfamily C, 1; protocadherin alpha subfamily C, 2; protocadherin alpha 1; protocadherin alpha 10; protocadherin alpha 11; protocadherin alpha 12; protocadherin alpha 13; protocadherin alpha 2; protocadherin alpha 3; protocadherin alpha 4; protocadherin alpha 5; protocadherin alpha 6; protocadherin alpha 7; protocadherin alpha 8; protocadherin alpha 14 p…
TC1700011558.hg.1	9.75	8.36	2.62	0.0031	SLC16A6	solute carrier family 16, member 6
TC1600007718.hg.1	6.65	7.99	-2.54	0.0031	ORC6	origin recognition complex subunit 6
TC0700006844.hg.1	7.69	5.49	4.6	0.0031	ITGB8	integrin beta 8
TC0200007155.hg.1	8.99	7.57	2.69	0.0031	EHD3	EH domain containing 3
TC0100017094.hg.1	9.78	11.56	-3.44	0.0031	FAM72A	family with sequence similarity 72, member A
TC0100009482.hg.1	4.92	6.22	-2.47	0.0032	HIPK1	Memczak2013 ALT_DONOR, coding, INTERNAL, intronic best transcript NM_198268
TC0800011855.hg.1	5.51	6.82	-2.49	0.0032	KCNQ3	potassium channel, voltage gated KQT-like subfamily Q, member 3
TC1700012275.hg.1	4.59	5.9	-2.48	0.0032	EFCAB13	EF-hand calcium binding domain 13
TC0300011899.hg.1	11.49	10.32	2.26	0.0032	CBLB	Cbl proto-oncogene B, E3 ubiquitin protein ligase
TC0300014095.hg.1	10.6	6.4	18.35	0.0032	TM4SF19	transmembrane 4 L six family member 19
TC0600007375.hg.1	8.22	9.57	-2.54	0.0032	HIST1H3H	histone cluster 1, H3h
TC0300014075.hg.1	10.39	11.54	-2.23	0.0032	TRIM59	tripartite motif containing 59
TC0200011040.hg.1	14.27	12.06	4.64	0.0033	ITM2C	integral membrane protein 2C
TC1700008668.hg.1	3.82	5.45	-3.1	0.0033	PRKCA	Jeck2013 ALT_ACCEPTOR, ALT_DONOR, coding, INTERNAL, intronic best transcript NM_002737
TC1400008844.hg.1	8.53	9.57	-2.06	0.0033	HECTD1	HECT domain containing E3 ubiquitin protein ligase 1
TC0300013933.hg.1	5.87	7.17	-2.48	0.0033	THUMPD3-AS1	THUMPD3 antisense RNA 1
TC0200010729.hg.1	6.98	8.33	-2.54	0.0033	XRCC5	Transcript Identified by AceView, Entrez Gene ID(s) 7520
TC0700008875.hg.1	4.66	5.81	-2.22	0.0033	MET	MET proto-oncogene, receptor tyrosine kinase
TC1200009103.hg.1	12.59	10.94	3.14	0.0033	PRKAB1	protein kinase, AMP-activated, beta 1 non-catalytic subunit
TC0100006725.hg.1	7.67	6.67	2.01	0.0034	PER3	period circadian clock 3
TC0600013542.hg.1	5.13	4.11	2.03	0.0034	ULBP3	UL16 binding protein 3
TC0100009149.hg.1	4.81	6.06	-2.38	0.0034	PTBP2	Transcript Identified by AceView, Entrez Gene ID(s) 58155
TC1300006861.hg.1	4.82	3.56	2.38	0.0034	NBEA	neurobeachin
TC1500009522.hg.1	7.27	8.5	-2.35	0.0034	MNS1	meiosis-specific nuclear structural 1
TC1200010650.hg.1	11.93	12.96	-2.04	0.0034	RACGAP1	Rac GTPase activating protein 1
TC1300008793.hg.1	9.72	8.41	2.49	0.0034	TSC22D1	TSC22 domain family, member 1
TC0700010020.hg.1	7.94	6.7	2.36	0.0035	PSMG3	proteasome (prosome, macropain) assembly chaperone 3
TC1200007769.hg.1	9.85	11.28	-2.69	0.0035	PDE1B	phosphodiesterase 1B, calmodulin-dependent
TC0200015556.hg.1	8.2	9.48	-2.43	0.0035	FZD5	frizzled class receptor 5
TC1400010705.hg.1	4.66	5.85	-2.29	0.0035	C14orf80	chromosome 14 open reading frame 80
TC0200016560.hg.1	5.42	4.37	2.07	0.0035	KLHL41	kelch-like family member 41
TC1800007523.hg.1	10.09	8.9	2.28	0.0036	PHLPP1	PH domain and leucine rich repeat protein phosphatase 1
TC0900010386.hg.1	12.67	11.37	2.46	0.0037	TMEM2	transmembrane protein 2
TC0400010256.hg.1	7.07	5.7	2.58	0.0037	CCDC149	coiled-coil domain containing 149
TC1400009710.hg.1	5.9	6.91	-2.01	0.0037	ACYP1	acylphosphatase 1, erythrocyte (common) type
TC1900011969.hg.1	6.8	5.73	2.1	0.0038	IRGQ	immunity-related GTPase family, Q
TC0200016643.hg.1	8.77	7.68	2.12	0.0038	DNMT3A	DNA (cytosine-5-)-methyltransferase 3 alpha
TC1000012398.hg.1	10.58	9.27	2.48	0.0038	FUOM	fucose mutarotase
TC0300007367.hg.1	6.86	5.2	3.16	0.0038	KLHDC8B	kelch domain containing 8B
TC0900010933.hg.1	6.64	8.08	-2.71	0.0038	CTSV	cathepsin V
TC2000009028.hg.1	6.74	7.8	-2.09	0.0038	MROH8	maestro heat-like repeat family member 8
TC1700009556.hg.1	12.51	13.64	-2.19	0.0038	SCIMP	SLP adaptor and CSK interacting membrane protein
TC0700011797.hg.1	8.25	9.46	-2.31	0.0038	SAMD9L	sterile alpha motif domain containing 9-like
TC1200012708.hg.1	12.04	13.94	-3.72	0.0039	OAS1	2-5-oligoadenylate synthetase 1
TC1700009528.hg.1	15.35	13.91	2.71	0.0039	CXCL16	chemokine (C-X-C motif) ligand 16
TC1900008881.hg.1	6.55	4.94	3.05	0.004	FCAR	Fc fragment of IgA receptor
TC0300010476.hg.1	9.17	10.43	-2.39	0.004	SGOL1	shugoshin-like 1 (S. pombe)
TC0400011477.hg.1	9.94	11.28	-2.54	0.004	CENPE	centromere protein E
TC0100016831.hg.1	9.67	11.11	-2.71	0.004	ASPM	abnormal spindle microtubule assembly
TC0800007065.hg.1	8.43	9.94	-2.85	0.004	CDCA2	cell division cycle associated 2
TC2000007503.hg.1	9	10.14	-2.2	0.004	UBE2C	ubiquitin-conjugating enzyme E2C
TC0600013280.hg.1	8.79	9.89	-2.15	0.004	MAP3K5	mitogen-activated protein kinase kinase kinase 5
TC1900011770.hg.1	14.52	13.47	2.08	0.004	C5AR1	complement component 5a receptor 1
TC0100016973.hg.1	11.88	10.82	2.08	0.004	CYB5R1	cytochrome b5 reductase 1
TC1900009310.hg.1	7.88	5.79	4.27	0.0041	MATK	megakaryocyte-associated tyrosine kinase
TC0500013155.hg.1	11.52	9.52	4.01	0.0041	BASP1	brain abundant, membrane attached signal protein 1
TC2100007205.hg.1	8.68	9.94	-2.4	0.0041	MX2	MX dynamin-like GTPase 2
TC0600007377.hg.1	13.23	15.41	-4.53	0.0041	HIST1H2BM	histone cluster 1, H2bm
TC0700010751.hg.1	13.35	12.24	2.16	0.0041	AOAH	acyloxyacyl hydrolase (neutrophil)
TC0300011815.hg.1	10.49	9.3	2.28	0.0042	DCBLD2	discoidin, CUB and LCCL domain containing 2
TC1600007741.hg.1	3.22	5.5	-4.86	0.0042	PHKB	Transcript Identified by AceView, Entrez Gene ID(s) 5257
TC0900006539.hg.1	6.82	8.61	-3.45	0.0043	JAK2	Memczak2013 ALT_ACCEPTOR, ALT_DONOR, coding, INTERNAL, intronic best transcript NM_004972
TC1700010723.hg.1	7.19	5.47	3.29	0.0043	PTRF	polymerase I and transcript release factor
TC1200006616.hg.1	11.07	9.95	2.17	0.0043	LTBR	lymphotoxin beta receptor (TNFR superfamily, member 3)
TC1300008916.hg.1	8.83	7.41	2.66	0.0044	CAB39L	calcium binding protein 39-like
TC0800010926.hg.1	9.05	10.11	-2.08	0.0044	PAG1	phosphoprotein membrane anchor with glycosphingolipid microdomains 1
TC0600009611.hg.1	7.83	6.81	2.04	0.0044	HEBP2	heme binding protein 2
TC1500007633.hg.1	7.04	5.6	2.73	0.0044	SMAD3	SMAD family member 3
TC0400006994.hg.1	11.35	13.24	-3.69	0.0044	NCAPG	non-SMC condensin I complex subunit G
TC0700008293.hg.1	3.85	2.75	2.15	0.0045	STEAP2	STEAP family member 2, metalloreductase
TC0100011871.hg.1	5.31	6.78	-2.77	0.0046	HIST3H2BB	histone cluster 3, H2bb
TC1200009621.hg.1	10.41	11.57	-2.24	0.0047	FOXM1	forkhead box M1
TC0500009320.hg.1	9.76	11.09	-2.52	0.0047	HMMR	hyaluronan-mediated motility receptor (RHAMM)
TC1100012471.hg.1	10.31	11.49	-2.26	0.0048	AMICA1	adhesion molecule, interacts with CXADR antigen 1
TC0500009281.hg.1	8.43	9.8	-2.57	0.0048	PTTG1	pituitary tumor-transforming 1
TC1100011294.hg.1	4.73	6.16	-2.71	0.0048	CTSF	cathepsin F
TC1200008942.hg.1	13.41	12.12	2.46	0.0048	PLBD2	phospholipase B domain containing 2
TC0200008666.hg.1	6.6	4.42	4.55	0.0049	IL1R1	interleukin 1 receptor, type I
TC1500007163.hg.1	9.93	11.26	-2.5	0.0049	DUT	deoxyuridine triphosphatase
TC1200007461.hg.1	10.41	9.2	2.31	0.0049	PCED1B	PC-esterase domain containing 1B
TC0600008630.hg.1	10.98	12.54	-2.94	0.0049	TTK	TTK protein kinase
TC0500013414.hg.1	9.97	11.39	-2.67	0.0049	THOC3	THO complex 3
TC0100013561.hg.1	12.18	9.12	8.33	0.005	FABP3	fatty acid binding protein 3, muscle and heart
TC0400010449.hg.1	5.82	6.9	-2.11	0.005	TLR10	toll-like receptor 10
TC0700006984.hg.1	9.85	10.93	-2.12	0.0051	SNX10	sorting nexin 10
TC0300009500.hg.1	14.27	13.24	2.05	0.0051	FNDC3B	fibronectin type III domain containing 3B
TC0X00007537.hg.1	8.95	10.56	-3.06	0.0051	KIF4A	kinesin family member 4A
TC1100006966.hg.1	9.58	7.37	4.62	0.0051	NCR3LG1	natural killer cell cytotoxicity receptor 3 ligand 1
TC0600010064.hg.1	5.39	4.36	2.04	0.0051	MAS1	MAS1 proto-oncogene, G protein-coupled receptor
TC1000007761.hg.1	13.71	12.59	2.17	0.0051	ARID5B	AT rich interactive domain 5B (MRF1-like)
TC1900010864.hg.1	8.81	7.58	2.35	0.0052	KCNN4	potassium channel, calcium activated intermediate/small conductance subfamily N alpha, member 4
TC0100009176.hg.1	7.49	8.68	-2.29	0.0052	SNX7	sorting nexin 7
TC0100010227.hg.1	8.38	9.59	-2.31	0.0052	CD1D	CD1d molecule
TC0500009055.hg.1	9.08	7.98	2.14	0.0052	ABLIM3	actin binding LIM protein family, member 3
TC1700010420.hg.1	12.37	13.49	-2.17	0.0052	SLFN11	schlafen family member 11
TC0100015060.hg.1	8.47	6.29	4.54	0.0053	LRRC39	leucine rich repeat containing 39
TC0200011991.hg.1	8.74	7.6	2.2	0.0053	ADCY3	adenylate cyclase 3
TC1100008514.hg.1	7.22	5.93	2.45	0.0053	TSKU	tsukushi, small leucine rich proteoglycan
TC0300007842.hg.1	4.76	5.79	-2.05	0.0054	EBLN2	endogenous Bornavirus-like nucleoprotein 2
TC1500008470.hg.1	10.15	8.75	2.65	0.0054	ARRDC4	arrestin domain containing 4
TC0100008182.hg.1	4.42	3.24	2.28	0.0054	CYP4X1	cytochrome P450, family 4, subfamily X, polypeptide 1
TC1700009036.hg.1	10.24	9.1	2.2	0.0054	TMC8	transmembrane channel like 8
TC1100007728.hg.1	11.7	13.28	-2.99	0.0055	FAM111A	family with sequence similarity 111, member A
TC0200016417.hg.1	7.42	8.88	-2.75	0.0055	CENPA	centromere protein A
TC0500007972.hg.1	11.93	10.11	3.52	0.0055	VCAN	versican
TC0500011752.hg.1	4.4	5.71	-2.49	0.0056	FEM1C	Jeck2013 ALT_ACCEPTOR, ALT_DONOR, coding, INTERNAL, intronic best transcript NM_020177
TC2000009550.hg.1	12.57	13.6	-2.05	0.0056	AURKA	aurora kinase A
TSUnmapped00000246.hg.1	8.08	9.46	-2.61	0.0056	CCDC84	coiled-coil domain containing 84
TC0300012216.hg.1	8.8	9.93	-2.18	0.0056	CCDC14	coiled-coil domain containing 14
TC0300011423.hg.1	7.5	8.54	-2.06	0.0056	LRIG1	leucine-rich repeats and immunoglobulin-like domains 1
TC0200016402.hg.1	6.27	7.68	-2.67	0.0057	RSAD2	radical S-adenosyl methionine domain containing 2
TC1600006652.hg.1	10.59	9.16	2.69	0.0057	TNFRSF12A	tumor necrosis factor receptor superfamily, member 12A
TC2100007451.hg.1	8.26	6.16	4.28	0.0058	COL6A2	collagen, type VI, alpha 2
TC1500006999.hg.1	12.62	13.96	-2.54	0.0058	NUSAP1	nucleolar and spindle associated protein 1
TC2000008228.hg.1	11.53	10.42	2.16	0.0058	SIGLEC1	sialic acid binding Ig-like lectin 1, sialoadhesin
TC0500012842.hg.1	10.4	8.62	3.43	0.0058	DUSP1	dual specificity phosphatase 1
TC2100008285.hg.1	10.09	7.44	6.27	0.0059	CBS	cystathionine-beta-synthase
TC0800009782.hg.1	4.8	3.8	2	0.0059	CSGALNACT1	chondroitin sulfate N-acetylgalactosaminyltransferase 1
TC1300008487.hg.1	9.17	8.12	2.07	0.0059	SLC7A1	solute carrier family 7 (cationic amino acid transporter, y+ system), member 1
TC1000009414.hg.1	9.78	8.7	2.11	0.0059	INPP5A	inositol polyphosphate-5-phosphatase A
TC0200015246.hg.1	10.47	7.19	9.73	0.006	STAT4	signal transducer and activator of transcription 4
TC1100010175.hg.1	7.55	6.07	2.8	0.006	RRAS2	related RAS viral (r-ras) oncogene homolog 2
TC0100017534.hg.1	7.51	5.87	3.13	0.006	ITPKB	inositol-trisphosphate 3-kinase B
TC1600008567.hg.1	9.47	10.48	-2.02	0.006	CENPN	centromere protein N
TC0300013513.hg.1	9.42	10.9	-2.79	0.0061	P3H2	prolyl 3-hydroxylase 2
TC1000008400.hg.1	10	11.69	-3.23	0.0061	IFIT1	interferon-induced protein with tetratricopeptide repeats 1
TC0100017083.hg.1	14.46	12.21	4.74	0.0061	RAB7B	RAB7B, member RAS oncogene family
TC0600012708.hg.1	9.78	11.13	-2.55	0.0061	BVES	blood vessel epicardial substance
TC0800007866.hg.1	3.1	4.25	-2.21	0.0061	MCMDC2	minichromosome maintenance domain containing 2
TC0100015858.hg.1	13.14	16.43	-9.77	0.0062	S100A8	S100 calcium binding protein A8
TC0200013030.hg.1	4.37	5.49	-2.17	0.0062	DYSF; kydor	Memczak2013 ANTISENSE, coding, INTERNAL, UTR5 best transcript NM_003494; Transcript Identified by AceView
TC0200013912.hg.1	10.34	11.47	-2.2	0.0062	CKAP2L	cytoskeleton associated protein 2-like
TC1700012296.hg.1	8.24	9.38	-2.21	0.0063	PRKAR1A; ARSG	protein kinase, cAMP-dependent, regulatory, type I, alpha; arylsulfatase G
TC2100007491.hg.1	10.11	7.53	5.97	0.0063	CBS	cystathionine-beta-synthase
TC1700009318.hg.1	11.04	9.54	2.83	0.0064	FAM101B	family with sequence similarity 101, member B
TC1000007950.hg.1	7.54	6.08	2.76	0.0064	UNC5B	unc-5 netrin receptor B
TC0400009001.hg.1	4.47	6.27	-3.46	0.0065	FAM160A1	family with sequence similarity 160, member A1
TC0200012863.hg.1	9.63	8.4	2.35	0.0065	SPRED2	sprouty-related, EVH1 domain containing 2
TC0500012826.hg.1	10.77	9.11	3.17	0.0065	SH3PXD2B	SH3 and PX domains 2B
TC0900011778.hg.1	11.44	9.96	2.78	0.0066	RAPGEF1	Rap guanine nucleotide exchange factor 1
TSUnmapped00000242.hg.1	4.95	5.98	-2.04	0.0066	KIF15	kinesin family member 15
TC1200008921.hg.1	6.28	8.73	-5.48	0.0066	OAS2	2-5-oligoadenylate synthetase 2
TC1900006991.hg.1	11.07	10.03	2.05	0.0067	SLC44A2	solute carrier family 44 (choline transporter), member 2
TC1300008426.hg.1	4.95	6.04	-2.13	0.0067	USP12	Transcript Identified by AceView, Entrez Gene ID(s) 219333
TC1700012093.hg.1	8.9	7.79	2.16	0.0067	FASN	fatty acid synthase
TC0700008073.hg.1	12.55	10.59	3.9	0.0067	POR; MIR4651	P450 (cytochrome) oxidoreductase; microRNA 4651
TC1700006909.hg.1	5.82	4.5	2.49	0.0068	MYOCD	myocardin
TC0900011597.hg.1	6.54	8.18	-3.11	0.0068	SH2D3C	SH2 domain containing 3C
TC1000010276.hg.1	6.19	7.91	-3.29	0.0068	NRP1	Transcript Identified by AceView, Entrez Gene ID(s) 8829
TC1500007196.hg.1	6.65	5.2	2.74	0.0068	SLC27A2	solute carrier family 27 (fatty acid transporter), member 2
TC0100011581.hg.1	10.05	11.6	-2.93	0.0069	CENPF	centromere protein F
TC0100008816.hg.1	6.15	7.51	-2.56	0.0069	IFI44	interferon-induced protein 44
TC0600013001.hg.1	7.42	8.47	-2.06	0.0069	CEP85L	centrosomal protein 85kDa-like
TC0300006691.hg.1	8.3	6.87	2.68	0.0071	FGD5	FYVE, RhoGEF and PH domain containing 5
TC0900008497.hg.1	7.88	6.79	2.14	0.0071	ZNF618	zinc finger protein 618
TC1200009967.hg.1	9.8	8.4	2.65	0.0071	DUSP16	dual specificity phosphatase 16
TC0600008253.hg.1	8.46	9.75	-2.45	0.0071	PAQR8	progestin and adipoQ receptor family member VIII
TC0100011533.hg.1	8.77	6.46	4.95	0.0071	ATF3	activating transcription factor 3
TC1900008824.hg.1	13.46	12.1	2.56	0.0072	MYADM	myeloid-associated differentiation marker
TC0100007447.hg.1	4.48	5.67	-2.28	0.0072	CEP85	centrosomal protein 85kDa
TC0700009680.hg.1	10.34	7.77	5.96	0.0072	TMEM176A	transmembrane protein 176A
TC1000011398.hg.1	7.46	8.73	-2.4	0.0073	HTR7	5-hydroxytryptamine (serotonin) receptor 7, adenylate cyclase-coupled
TC0300006575.hg.1	8.9	10.13	-2.35	0.0074	FANCD2	Fanconi anemia complementation group D2
TC1900011763.hg.1	8.8	7.47	2.51	0.0074	APOC4-APOC2; APOC2	APOC4-APOC2 readthrough (NMD candidate); apolipoprotein C-II
TC0300009310.hg.1	6.51	5.34	2.25	0.0075	MLF1	myeloid leukemia factor 1
TC1000007748.hg.1	11.71	13.01	-2.46	0.0076	CDK1	cyclin-dependent kinase 1
TC0800008126.hg.1	9.59	8.39	2.3	0.0076	CA2	carbonic anhydrase II
TC0700011054.hg.1	6.95	5.54	2.66	0.0076	GRB10	growth factor receptor bound protein 10
TC1700012471.hg.1	5.18	6.37	-2.3	0.0077	MIR4738; H3F3B	microRNA 4738; H3 histone, family 3B (H3.3B)
TC0500013241.hg.1	3.94	2.9	2.05	0.0078	PCDHB5	protocadherin beta 5
TC1000008666.hg.1	5.72	4.64	2.11	0.0079	LZTS2	leucine zipper, putative tumor suppressor 2
TC0700013047.hg.1	11.32	8.87	5.49	0.008	TMEM176B	transmembrane protein 176B
TC1800006484.hg.1	10.13	11.91	-3.41	0.008	NDC80	NDC80 kinetochore complex component
TC1300006879.hg.1	6.13	4.84	2.45	0.0081	CCNA1	cyclin A1
TC0500010203.hg.1	8.76	6.99	3.4	0.0081	MYO10	myosin X
TC2000009597.hg.1	3.03	4.45	-2.68	0.0081	CTCFL	CCCTC-binding factor (zinc finger protein)-like
TC2200007891.hg.1	5.64	4.47	2.25	0.0082	CECR6	cat eye syndrome chromosome region, candidate 6
TC0600007610.hg.1	4.89	6.24	-2.54	0.0082	MSH5; MSH5-SAPCD1; SAPCD1	mutS homolog 5; MSH5-SAPCD1 readthrough (NMD candidate); suppressor APC domain containing 1
TC2000008381.hg.1	7.75	6.21	2.93	0.0082	JAG1	jagged 1
TC0500009707.hg.1	4.7	3.6	2.15	0.0082	SQSTM1	Transcript Identified by AceView, Entrez Gene ID(s) 8878
TC1900008925.hg.1	7.4	8.42	-2.03	0.0082	U2AF2	Memczak2013 ALT_ACCEPTOR, ALT_DONOR, coding, INTERNAL, intronic best transcript NM_001012478
TC0600013271.hg.1	6.71	7.78	-2.1	0.0083	MTFR2	mitochondrial fission regulator 2
TC1900011758.hg.1	13.82	11.79	4.1	0.0083	APOE	apolipoprotein E
TC0700007271.hg.1	12.1	10.59	2.84	0.0083	RALA	v-ral simian leukemia viral oncogene homolog A (ras related)
TC0200013878.hg.1	11.2	12.85	-3.15	0.0083	BUB1	BUB1 mitotic checkpoint serine/threonine kinase
TC0500007665.hg.1	9.96	11.62	-3.17	0.0084	CCNB1	cyclin B1
TC2200007662.hg.1	7.93	9.32	-2.62	0.0084	GTSE1	G-2 and S-phase expressed 1
TC0200015773.hg.1	8.04	6.57	2.77	0.0085	PTPRN	protein tyrosine phosphatase, receptor type, N
TC1700011892.hg.1	11.79	13.13	-2.53	0.0085	TK1	thymidine kinase 1, soluble
TC1400007511.hg.1	6.38	7.42	-2.06	0.0085	RAD51B	RAD51 paralog B
TC1600006888.hg.1	10.36	8.59	3.43	0.0087	CIITA	class II, major histocompatibility complex, transactivator
TC0300014092.hg.1	9.79	6.42	10.35	0.0087	TM4SF19-TCTEX1D2	TM4SF19-TCTEX1D2 readthrough (NMD candidate)
TC0300007055.hg.1	8.23	6.5	3.32	0.0089	CTDSPL	CTD small phosphatase like
TC1900012036.hg.1	9.46	8.13	2.52	0.0089	LILRB3	leukocyte immunoglobulin-like receptor, subfamily B (with TM and ITIM domains), member 3
TC1900010391.hg.1	14.01	12.97	2.05	0.009	PEPD	peptidase D
TC0100007471.hg.1	6.33	7.6	-2.41	0.009	RPS6KA1	Zhang2013 ALT_ACCEPTOR, ALT_DONOR, coding, INTERNAL, intronic best transcript NM_002953
TC0400011748.hg.1	11.82	12.97	-2.21	0.009	CCNA2	cyclin A2
TC1700006524.hg.1	11.67	9.65	4.06	0.009	SERPINF1	serpin peptidase inhibitor, clade F (alpha-2 antiplasmin, pigment epithelium derived factor), member 1
TC1700012380.hg.1	6.42	7.65	-2.36	0.0091	SPAG5	sperm associated antigen 5
TC1700009566.hg.1	5.82	6.86	-2.06	0.0092	NLRP1	NLR family, pyrin domain containing 1
TC0200015976.hg.1	10.88	12.06	-2.26	0.0092	SP110	SP110 nuclear body protein
TC0200014845.hg.1	7.93	8.95	-2.03	0.0093	SPC25	SPC25, NDC80 kinetochore complex component
TC0300007393.hg.1	5.16	6.18	-2.03	0.0093	UBA7	Memczak2013 ANTISENSE, coding, INTERNAL, intronic best transcript NM_003335
TC0900009948.hg.1	6.89	8.39	-2.84	0.0093	ARHGEF39	Rho guanine nucleotide exchange factor 39
TC0200008031.hg.1	9.98	8.79	2.29	0.0094	SPR	sepiapterin reductase (7,8-dihydrobiopterin:NADP+ oxidoreductase)
TSUnmapped00000749.hg.1	3.91	4.95	-2.06	0.0094	RPS6KA1	ribosomal protein S6 kinase, 90kDa, polypeptide 1
TC0600014370.hg.1	8.69	7.11	3	0.0095	RPS6KA2	ribosomal protein S6 kinase, 90kDa, polypeptide 2
TC0400012938.hg.1	10.2	8.83	2.59	0.0095	RASGEF1B	RasGEF domain family member 1B
TC2100008382.hg.1	6.14	7.31	-2.25	0.0095	KRTAP12-1	keratin associated protein 12-1
TC1400006543.hg.1	7.61	8.62	-2.02	0.0096	METTL17	methyltransferase like 17
TC0600007290.hg.1	13.03	14.05	-2.03	0.0097	HIST1H2BH	histone cluster 1, H2bh
TC0600008655.hg.1	6.26	4.32	3.83	0.0097	TPBG	trophoblast glycoprotein
TC0300012238.hg.1	8.3	7.07	2.34	0.0097	HEG1	heart development protein with EGF-like domains 1
TC0500012166.hg.1	8	9.24	-2.35	0.0097	CDC25C	cell division cycle 25C
TC0100015945.hg.1	7.12	8.24	-2.17	0.0097	THBS3	thrombospondin 3
TC0900011864.hg.1	8.23	6.52	3.26	0.0098	VAV2	vav 2 guanine nucleotide exchange factor
TC1200011982.hg.1	9.79	8.19	3.02	0.0098	RASAL1	RAS protein activator like 1 (GAP1 like)
TC0400012964.hg.1	10.23	11.3	-2.11	0.0098	SCLT1	sodium channel and clathrin linker 1
TC0X00010038.hg.1	5.1	4.09	2.02	0.0099	PHKA1	phosphorylase kinase, alpha 1 (muscle)
TC1900011845.hg.1	13.01	12	2.02	0.0099	MFSD12	major facilitator superfamily domain containing 12
TC0600009683.hg.1	9.09	10.28	-2.27	0.0099	AIG1	androgen-induced 1
TC0800011148.hg.1	8.09	9.18	-2.14	0.01	CCNE2	cyclin E2
TC0400011721.hg.1	6.92	8.15	-2.34	0.01	MAD2L1	MAD2 mitotic arrest deficient-like 1 (yeast)
TC1000010439.hg.1	3.4	4.78	-2.6	0.01	HNRNPF	Memczak2013 ALT_ACCEPTOR, ALT_DONOR, coding, INTERNAL, intronic best transcript NM_001098207
TC1400010617.hg.1	9.56	7.81	3.37	0.01	PRKCH	protein kinase C, eta
TC0100016135.hg.1	8.54	6.51	4.07	0.01	SLAMF6	SLAM family member 6
TC0200010419.hg.1	8.97	10.13	-2.23	0.0101	SGOL2	shugoshin-like 2 (S. pombe)
TC1700012212.hg.1	7.11	5.44	3.19	0.0102	CCDC144NL-AS1	CCDC144NL antisense RNA 1
TC1100007408.hg.1	5.26	4.11	2.23	0.0103	PRDM11	PR domain containing 11
TC1600007235.hg.1	14.01	15.05	-2.06	0.0104	PLK1	polo-like kinase 1
TC1200007051.hg.1	9.47	8.41	2.08	0.0105	PYROXD1	pyridine nucleotide-disulphide oxidoreductase domain 1
TC1800007518.hg.1	8.59	7.57	2.03	0.0105	ZCCHC2	zinc finger, CCHC domain containing 2
TC0300013636.hg.1	5.23	6.4	-2.25	0.0105	ACAP2; ACAP2-IT1; AC090018.3	Transcript Identified by AceView, Entrez Gene ID(s) 23527; ACAP2 intronic transcript 1 (non-protein coding) [Source:HGNC Symbol;Acc:HGNC:41426]; novel transcript; ACAP2 intronic transcript 1 [Source:HGNC Symbol;Acc:HGNC:41426]
TC1700011423.hg.1	6.98	8.2	-2.32	0.0105	FTSJ3	FtsJ homolog 3 (E. coli)
TC1400009829.hg.1	9.25	10.68	-2.69	0.0106	CEP128	centrosomal protein 128kDa
TC0300007596.hg.1	6.03	5.02	2.02	0.0106	FLNB	filamin B, beta
TC0500006472.hg.1	8.21	9.31	-2.14	0.0107	TRIP13	thyroid hormone receptor interactor 13
TC0100018293.hg.1	3.7	4.86	-2.23	0.0107	LCE5A	late cornified envelope 5A
TC1900009854.hg.1	5.82	4.51	2.47	0.0108	NOTCH3	notch 3
TC1600007022.hg.1	11.34	10.18	2.24	0.0109	ABCC1	ATP binding cassette subfamily C member 1
TC1700007771.hg.1	9.14	8.05	2.12	0.0109	GSDMA	gasdermin A
TC1400007207.hg.1	10.4	9.21	2.29	0.011	SAMD4A	sterile alpha motif domain containing 4A
TC0200014414.hg.1	12.16	7.41	26.88	0.011	CXCR4	chemokine (C-X-C motif) receptor 4
TC1000009149.hg.1	11.68	10.52	2.24	0.011	PLEKHA1	pleckstrin homology domain containing, family A (phosphoinositide binding specific) member 1
TSUnmapped00000627.hg.1	9.36	10.93	-2.98	0.0111	KIF15	kinesin family member 15
TC0600010797.hg.1	5.07	3.89	2.27	0.0112	MAK	male germ cell-associated kinase
TC1200009875.hg.1	5.89	7.43	-2.9	0.0113	CLECL1	C-type lectin-like 1
TC0900008865.hg.1	8.04	6.95	2.13	0.0113	CERCAM	cerebral endothelial cell adhesion molecule
TC0100011958.hg.1	10.04	11.05	-2.02	0.0113	GNPAT	glyceronephosphate O-acyltransferase
TC1000008471.hg.1	10.83	12.31	-2.8	0.0114	KIF11	kinesin family member 11
TC2100006659.hg.1	5.55	4.36	2.27	0.0114	CXADR	coxsackie virus and adenovirus receptor
TC0200011130.hg.1	8.58	7.44	2.21	0.0115	DGKD	diacylglycerol kinase, delta 130kDa
TC1300006802.hg.1	8.71	9.71	-2	0.0116	BRCA2	breast cancer 2, early onset
TC0100008517.hg.1	5.25	6.61	-2.57	0.0117	NFIA	nuclear factor I/A
TC1700012285.hg.1	12.01	13.27	-2.4	0.0118	PRR11	proline rich 11
TC1900011762.hg.1	10.65	8.64	4.02	0.0119	APOC2	apolipoprotein C-II
TC0800011334.hg.1	9.62	8.28	2.54	0.0119	KLF10	Kruppel-like factor 10
TC1900008343.hg.1	7.12	6	2.17	0.0119	QPCTL	glutaminyl-peptide cyclotransferase-like
TSUnmapped00000525.hg.1	5.31	6.38	-2.11	0.012	BCL2L14	BCL2-like 14 (apoptosis facilitator)
TC0600007384.hg.1	6.4	7.7	-2.47	0.0121	HIST1H2BO	histone cluster 1, H2bo
TC1500007829.hg.1	8.26	6.21	4.15	0.0121	LOXL1	lysyl oxidase-like 1
TC0100014531.hg.1	7.38	5.66	3.29	0.0122	WLS	wntless Wnt ligand secretion mediator
TC0600007262.hg.1	8.05	9.62	-2.97	0.0122	HIST1H3A	histone cluster 1, H3a
TC0300013344.hg.1	10.52	9.24	2.43	0.0123	KLHL6	kelch-like family member 6
TC0800012349.hg.1	8.15	9.36	-2.31	0.0123	MTBP	MDM2 binding protein
TC1900011910.hg.1	8.46	7.43	2.05	0.0123	HOMER3	homer scaffolding protein 3
TC1600006610.hg.1	9.03	10.28	-2.37	0.0123	CCNF	cyclin F
TC0100012695.hg.1	4.15	5.51	-2.58	0.0125	DNAJC11	Zhang2013 ALT_ACCEPTOR, ALT_DONOR, coding, INTERNAL, intronic best transcript NM_018198
TC0700010189.hg.1	9.6	8.54	2.09	0.0125	CYTH3	cytohesin 3
TC0300011597.hg.1	6.88	7.94	-2.09	0.0126	ZNF717	zinc finger protein 717
TC2000006442.hg.1	8.12	7.05	2.1	0.0126	NRSN2	neurensin 2
TC1100012134.hg.1	14.96	16.14	-2.27	0.0127	MMP12	matrix metallopeptidase 12
TC0100010032.hg.1	14.48	15.65	-2.25	0.0127	S100A9	S100 calcium binding protein A9
TC1900010009.hg.1	9.11	7.84	2.4	0.0128	JUND	jun D proto-oncogene
TC2000007239.hg.1	7.21	5.82	2.63	0.0129	EPB41L1	erythrocyte membrane protein band 4.1-like 1
TC1600007982.hg.1	13.82	12.79	2.04	0.013	HERPUD1	homocysteine-inducible, endoplasmic reticulum stress-inducible, ubiquitin-like domain member 1
TC0900006815.hg.1	4.57	3.52	2.07	0.013	DMRTA1	DMRT-like family A1
TC0100016145.hg.1	6.59	7.73	-2.2	0.0132	CD244	CD244 molecule, natural killer cell receptor 2B4
TC0400011620.hg.1	7.56	8.6	-2.05	0.0134	ZGRF1	zinc finger, GRF-type containing 1
TC1500007822.hg.1	11.15	9.78	2.58	0.0135	CD276	CD276 molecule
TC0400009088.hg.1	6.11	7.46	-2.55	0.0136	GUCY1B3	guanylate cyclase 1, soluble, beta 3
TC0900009776.hg.1	10.88	9.41	2.76	0.0138	MOB3B	MOB kinase activator 3B
TC1600009779.hg.1	4.46	5.53	-2.1	0.0139	ARHGAP17	Memczak2013 ALT_ACCEPTOR, ALT_DONOR, coding, INTERNAL, intronic best transcript NM_001006634
TC0600008697.hg.1	8.34	7.32	2.03	0.0139	NT5E	5-nucleotidase, ecto (CD73)
TC0300011391.hg.1	5.73	3.51	4.67	0.0139	ADAMTS9	ADAM metallopeptidase with thrombospondin type 1 motif 9
TC2000007341.hg.1	8.87	10.28	-2.65	0.014	FAM83D	family with sequence similarity 83, member D
TC1500006785.hg.1	10.22	11.89	-3.19	0.0141	ARHGAP11B; ARHGAP11A	Rho GTPase activating protein 11B; Rho GTPase activating protein 11A
TC1000008749.hg.1	10.94	8.7	4.72	0.0145	SFXN2	sideroflexin 2
TC0300008467.hg.1	13.01	11.61	2.64	0.0146	ARHGAP31	Rho GTPase activating protein 31
TC1200011608.hg.1	11.17	10.01	2.24	0.0148	CDK17	cyclin-dependent kinase 17
TC1500009738.hg.1	9.95	11.28	-2.52	0.0149	KIAA0101; CSNK1G1	KIAA0101; casein kinase 1, gamma 1
TC0800010630.hg.1	7.47	8.56	-2.13	0.0149	GGH	gamma-glutamyl hydrolase (conjugase, folylpolygammaglutamyl hydrolase)
TC0X00008910.hg.1	8.76	7.11	3.13	0.0149	ASMTL	acetylserotonin O-methyltransferase-like
TC0Y00006884.hg.1	8.76	7.11	3.13	0.0149	ASMTL	acetylserotonin O-methyltransferase-like
TC1500010184.hg.1	9.44	7.35	4.26	0.015	BCL2A1	BCL2-related protein A1
TC0200016099.hg.1	11.7	12.97	-2.4	0.015	HJURP	Holliday junction recognition protein
TC1900011406.hg.1	10.49	7.5	7.97	0.0151	LILRB5	leukocyte immunoglobulin-like receptor, subfamily B (with TM and ITIM domains), member 5
TC0100007841.hg.1	9.15	10.27	-2.16	0.0154	CDCA8	cell division cycle associated 8
TC0600007012.hg.1	11.86	8.2	12.66	0.0155	CD83	CD83 molecule
TC1700010562.hg.1	4.11	5.11	-2	0.0156	ARL5C	ADP-ribosylation factor like GTPase 5C
TSUnmapped00000127.hg.1	7.02	8.75	-3.33	0.0157	KIF15	kinesin family member 15
TC0300007223.hg.1	7.58	8.94	-2.58	0.0159	KIF15	kinesin family member 15
TC0500008544.hg.1	10.77	11.96	-2.27	0.016	LMNB1	lamin B1
TC1500007699.hg.1	10.22	11.48	-2.4	0.0161	KIF23	kinesin family member 23
TC0400010024.hg.1	6.75	8.02	-2.41	0.0162	SLC2A9	solute carrier family 2 (facilitated glucose transporter), member 9
TC0600009980.hg.1	8.31	7.01	2.46	0.0162	ZDHHC14	zinc finger, DHHC-type containing 14
TC1700012186.hg.1	11.44	10.41	2.05	0.0166	TNFSF13	tumor necrosis factor (ligand) superfamily, member 13
TC0300009337.hg.1	13.56	14.59	-2.05	0.0166	SMC4	structural maintenance of chromosomes 4
TC0100016664.hg.1	9.31	8.07	2.36	0.0167	COLGALT2	collagen beta(1-O)galactosyltransferase 2
TC1000007272.hg.1	14.75	13.35	2.63	0.0168	CREM	cAMP responsive element modulator
TC2100007039.hg.1	9.27	8.24	2.04	0.0168	DOPEY2	dopey family member 2
TC0100012543.hg.1	5.59	4.42	2.25	0.0168	FAM213B	Memczak2013 ANTISENSE, coding, INTERNAL, UTR3 best transcript NM_001195737
TC0600012132.hg.1	8.84	7.77	2.1	0.017	RAB23	RAB23, member RAS oncogene family
TC0400012947.hg.1	13.31	12.27	2.07	0.017	GPRIN3	GPRIN family member 3
TC1700011746.hg.1	12.52	11.49	2.04	0.017	SLC25A19	solute carrier family 25 (mitochondrial thiamine pyrophosphate carrier), member 19
TC0700013290.hg.1	9.82	11.18	-2.56	0.0171	NCAPG2	non-SMC condensin II complex subunit G2
TC1500008840.hg.1	8.78	7.1	3.2	0.0172	TJP1	tight junction protein 1
TC1100010030.hg.1	3.96	5.31	-2.55	0.0173	STK33	serine/threonine kinase 33
TC0600014277.hg.1	10.97	9.85	2.17	0.0173	HLA-DMA	major histocompatibility complex, class II, DM alpha
TC0500010865.hg.1	7.2	8.47	-2.41	0.0173	DEPDC1B	DEP domain containing 1B
TC1200010101.hg.1	5.01	4	2.01	0.0174	SLCO1A2	solute carrier organic anion transporter family, member 1A2
TC0600011130.hg.1	9.05	10.21	-2.24	0.0175	HIST1H4C	Jeck2013 ANTISENSE, CDS, coding, INTERNAL, OVCODE, OVEXON, UTR3 best transcript NM_003542
TC1100012126.hg.1	4.76	5.98	-2.33	0.0175	MMP8	matrix metallopeptidase 8
TC0200009978.hg.1	9.88	8.53	2.55	0.0179	PDK1	pyruvate dehydrogenase kinase, isozyme 1
TC0100012788.hg.1	10.24	8.71	2.87	0.0179	GPR157	G protein-coupled receptor 157
TC1100012002.hg.1	9.85	10.89	-2.05	0.018	MRE11A	MRE11 homolog A, double strand break repair nuclease
TC0800008493.hg.1	7.3	5.54	3.39	0.0181	DCSTAMP	dendrocyte expressed seven transmembrane protein
TC0100018451.hg.1	11.02	9.99	2.04	0.0181	GBP2	guanylate binding protein 2, interferon-inducible
TC1000010768.hg.1	9.2	6.5	6.49	0.0182	EGR2	early growth response 2
TC0100014930.hg.1	4.8	6.39	-3.02	0.0182	EVI5	Transcript Identified by AceView, Entrez Gene ID(s) 7813
TC0300012323.hg.1	10.08	11.35	-2.41	0.0184	MGLL	monoglyceride lipase
TSUnmapped00000012.hg.1	4.94	3.82	2.17	0.0184	LRP6	LDL receptor related protein 6
TC0100018481.hg.1	8.86	10.01	-2.22	0.0185	NOTCH2NL	notch 2 N-terminal like
TC1100007818.hg.1	9.53	8.07	2.77	0.0185	DAGLA	diacylglycerol lipase, alpha
TC0200007261.hg.1	8.47	9.51	-2.06	0.0185	QPCT	glutaminyl-peptide cyclotransferase
TC1400009248.hg.1	10.9	12.39	-2.81	0.0186	DLGAP5	discs, large (Drosophila) homolog-associated protein 5
TC1100010418.hg.1	10.23	11.61	-2.6	0.0186	KIF18A	kinesin family member 18A
TC0400011535.hg.1	7.98	6.71	2.42	0.0187	DKK2	dickkopf WNT signaling pathway inhibitor 2
TC1200012143.hg.1	8.22	9.28	-2.09	0.0188	CIT; MIR1178	citron rho-interacting serine/threonine kinase; microRNA 1178
TC0500011240.hg.1	6.49	4.99	2.82	0.0189	HOMER1	homer scaffolding protein 1
TC0500011220.hg.1	3.69	4.87	-2.27	0.019	AP3B1	Memczak2013 ALT_ACCEPTOR, ALT_DONOR, coding, INTERNAL, intronic best transcript NM_003664
TC0300012243.hg.1	7.65	6.06	3.02	0.019	SLC12A8	solute carrier family 12, member 8
TC1200012804.hg.1	8.71	9.89	-2.27	0.0191	PRIM1	primase, DNA, polypeptide 1 (49kDa)
TC1100012197.hg.1	5.38	4.04	2.54	0.0192	GUCY1A2	guanylate cyclase 1, soluble, alpha 2
TC0800011062.hg.1	4.76	5.91	-2.22	0.0193	NBN	Transcript Identified by AceView, Entrez Gene ID(s) 4683
TC1800007316.hg.1	8.52	9.53	-2.02	0.0195	SKA1	spindle and kinetochore associated complex subunit 1
TSUnmapped00000353.hg.1	8.89	7.75	2.2	0.0195	DUSP16	dual specificity phosphatase 16
TC1100013111.hg.1	9.56	10.83	-2.41	0.0195	CHEK1	checkpoint kinase 1
TC0500011334.hg.1	5.93	7.55	-3.08	0.0197	TMEM167A	Transcript Identified by AceView, Entrez Gene ID(s) 153339
TC0100009870.hg.1	11.25	12.55	-2.46	0.0198	HIST2H4B; HIST2H4A	histone cluster 2, H4b; histone cluster 2, H4a
TC1600008119.hg.1	9.81	8.81	2.01	0.0199	CDH5	cadherin 5, type 2 (vascular endothelium)
TC0100007638.hg.1	7.53	5.54	3.95	0.0201	SERINC2	serine incorporator 2
TC1400006551.hg.1	8.39	7.16	2.34	0.0202	ARHGEF40	Rho guanine nucleotide exchange factor (GEF) 40
TC0600010707.hg.1	7.24	6.06	2.27	0.0202	NRN1	neuritin 1
TC1000012570.hg.1	11.25	9.87	2.6	0.0202	NDST2	N-deacetylase/N-sulfotransferase (heparan glucosaminyl) 2
TC0500008890.hg.1	10.32	9.28	2.05	0.0203	PCDHGC3; PCDHGA12; PCDHGB4; PCDHGA8; PCDHGA1; PCDHGA10; PCDHGA11; PCDHGA2; PCDHGA3; PCDHGA4; PCDHGA5; PCDHGA6; PCDHGA7; PCDHGA9; PCDHGB1; PCDHGB2; PCDHGB3; PCDHGB5; PCDHGB6; PCDHGB7; PCDHGC4; PCDHGC5	protocadherin gamma subfamily C, 3; protocadherin gamma subfamily A, 12; protocadherin gamma subfamily B, 4; protocadherin gamma subfamily A, 8; protocadherin gamma subfamily A, 1; protocadherin gamma subfamily A, 10; protocadherin gamma subfamily A, 11; protocadherin gamma subfamily A, 2; protocadherin gamma subfamily A, 3; protocadherin gamma subfamily A, 4; protocadherin gamma subfamily A, 5; …
TC0500012956.hg.1	11.81	10.52	2.44	0.0203	HK3	hexokinase 3 (white cell)
TC0800007119.hg.1	9.77	10.9	-2.18	0.0204	ESCO2	establishment of sister chromatid cohesion N-acetyltransferase 2
TC0600012631.hg.1	9.13	10.27	-2.2	0.0204	MMS22L	MMS22-like, DNA repair protein
TC0800006980.hg.1	7.46	6.13	2.51	0.0204	SLC39A14	solute carrier family 39 (zinc transporter), member 14
TC1900011099.hg.1	7.69	5.18	5.68	0.0206	HSD17B14	hydroxysteroid (17-beta) dehydrogenase 14
TC2000007016.hg.1	9.54	10.64	-2.14	0.0206	GINS1	GINS complex subunit 1 (Psf1 homolog)
TC1000007132.hg.1	8.84	7.31	2.88	0.0207	BAMBI	BMP and activin membrane-bound inhibitor
TC1400010730.hg.1	5.94	4.89	2.08	0.0209	EGLN3	egl-9 family hypoxia-inducible factor 3
TC0600011228.hg.1	7.07	8.12	-2.08	0.0209	HIST1H2AK	histone cluster 1, H2ak
TSUnmapped00000527.hg.1	4.29	5.36	-2.09	0.021	LRIG1
TC1900011759.hg.1	9.31	6.81	5.64	0.021	APOC1	apolipoprotein C-I
TC0900012209.hg.1	6.17	7.36	-2.28	0.0211	TTC39B	tetratricopeptide repeat domain 39B
TC0900011820.hg.1	4.8	6	-2.29	0.0211	TSC1	Transcript Identified by AceView, Entrez Gene ID(s) 7248
TC2200009270.hg.1	10.65	11.76	-2.16	0.0213	APOBEC3B	apolipoprotein B mRNA editing enzyme, catalytic polypeptide-like 3B
TC0600009439.hg.1	7.02	5.57	2.73	0.0215	TMEM200A	transmembrane protein 200A
TC0X00010793.hg.1	8.75	7.61	2.21	0.0215	ZDHHC9	zinc finger, DHHC-type containing 9
TC1200006520.hg.1	7.9	6.38	2.87	0.0216	TSPAN9	tetraspanin 9
TC1300006979.hg.1	10.96	9.15	3.52	0.0218	RGCC	regulator of cell cycle
TC0100008308.hg.1	5.75	4.73	2.02	0.022	ZFYVE9	zinc finger, FYVE domain containing 9
TC2200009337.hg.1	8.22	6.77	2.73	0.022	GATSL3	GATS protein-like 3
TSUnmapped00000704.hg.1	4.09	5.17	-2.11	0.0221	FMN1	formin 1
TC1100007727.hg.1	8.76	10.56	-3.47	0.0221	FAM111B	family with sequence similarity 111, member B
TC2000009317.hg.1	7.68	6.19	2.82	0.0222	SULF2	sulfatase 2
TC1000008406.hg.1	9.85	11.13	-2.43	0.0223	KIF20B	kinesin family member 20B
TC0100015707.hg.1	11.36	12.69	-2.52	0.0224	HIST2H4A; HIST2H4B	histone cluster 2, H4a; histone cluster 2, H4b
TC0600010078.hg.1	5.63	4.01	3.09	0.0224	SLC22A3	solute carrier family 22 (organic cation transporter), member 3
TC1500007805.hg.1	4.5	5.72	-2.32	0.0226	BBS4	Memczak2013 ALT_ACCEPTOR, ALT_DONOR, coding, INTERNAL, intronic best transcript NM_033028
TC0100008260.hg.1	10.4	11.67	-2.41	0.0227	CDKN2C	cyclin-dependent kinase inhibitor 2C (p18, inhibits CDK4)
TC1100011257.hg.1	9.83	8.7	2.19	0.0227	EFEMP2	EGF containing fibulin-like extracellular matrix protein 2
TC0500011875.hg.1	8.94	7.84	2.15	0.0228	PPIC	peptidylprolyl isomerase C (cyclophilin C)
TC0900008949.hg.1	9.39	8.04	2.56	0.023	NCS1	neuronal calcium sensor 1
TC1900009493.hg.1	9.08	6.82	4.79	0.023	CD209	CD209 molecule
TC0100007800.hg.1	6.12	7.2	-2.11	0.0234	THRAP3	Jeck2013 ALT_ACCEPTOR, ALT_DONOR, coding, INTERNAL, intronic best transcript NM_005119
TC1900009603.hg.1	5.9	4.62	2.44	0.0235	OLFM2	olfactomedin 2
TC0100011022.hg.1	12.31	11.16	2.22	0.0235	RGS2	regulator of G-protein signaling 2
TC0900011072.hg.1	14.41	13.28	2.19	0.0237	ABCA1	ATP binding cassette subfamily A member 1
TC1900006727.hg.1	9.05	10.36	-2.47	0.0237	UHRF1	ubiquitin-like with PHD and ring finger domains 1
TC0400008345.hg.1	5.9	4.26	3.13	0.0238	SGMS2	sphingomyelin synthase 2
TC0900010789.hg.1	8.46	9.9	-2.72	0.0239	IARS	isoleucyl-tRNA synthetase
TC0100018551.hg.1	7.88	5.29	6.02	0.0242	CHIT1	chitinase 1 (chitotriosidase)
TC0600009843.hg.1	4.69	3.42	2.42	0.0243	PLEKHG1	pleckstrin homology domain containing, family G (with RhoGef domain) member 1
TC1800006715.hg.1	9.61	10.79	-2.27	0.0243	IMPA2	inositol(myo)-1(or 4)-monophosphatase 2
TC0100015754.hg.1	11.22	10.02	2.29	0.0244	CTSK	cathepsin K
TC0900007877.hg.1	7.32	5.79	2.91	0.0246	GADD45G	growth arrest and DNA-damage-inducible, gamma
TC0900006560.hg.1	10.01	8.77	2.36	0.0246	PDCD1LG2	programmed cell death 1 ligand 2
TC0200015194.hg.1	11.47	9.74	3.33	0.0247	TFPI	tissue factor pathway inhibitor (lipoprotein-associated coagulation inhibitor)
TC0300012164.hg.1	7.41	8.68	-2.41	0.0249	POLQ	polymerase (DNA directed), theta
TC1400010390.hg.1	5.87	4.62	2.38	0.0253	AHNAK2	AHNAK nucleoprotein 2
TC1200008474.hg.1	6.29	4.57	3.3	0.0253	SOCS2	suppressor of cytokine signaling 2
TC0800008324.hg.1	7.06	5.61	2.72	0.0253	MATN2	matrilin 2
TC0600007301.hg.1	8.86	10.2	-2.52	0.0254	BTN3A2	butyrophilin, subfamily 3, member A2
TC2200008710.hg.1	11.47	10.29	2.26	0.0254	JOSD1	Josephin domain containing 1
TC0100010230.hg.1	10.85	11.98	-2.19	0.0255	CD1C	CD1c molecule
TC0100010755.hg.1	8.52	7.48	2.06	0.0255	RALGPS2	Ral GEF with PH domain and SH3 binding motif 2
TC0200007458.hg.1	14.12	12.97	2.23	0.0256	EPAS1	endothelial PAS domain protein 1
TC0100015856.hg.1	8.94	12.48	-11.64	0.026	S100A12	S100 calcium binding protein A12
TC1200011791.hg.1	11.68	10.11	2.98	0.0269	CKAP4	cytoskeleton-associated protein 4
TC1200010182.hg.1	12.41	10.97	2.72	0.0269	BHLHE41	basic helix-loop-helix family, member e41
TC0600008109.hg.1	9.73	7.97	3.4	0.0272	VEGFA	vascular endothelial growth factor A
TC1500008170.hg.1	6.86	5.32	2.91	0.0273	ALPK3	alpha kinase 3
TC0200008502.hg.1	10.91	12.1	-2.28	0.0273	NCAPH	non-SMC condensin I complex subunit H
TC0700012849.hg.1	14.47	12.88	3.02	0.0275	CLEC5A	C-type lectin domain family 5, member A
TC2200007398.hg.1	8.28	6.9	2.62	0.0276	SYNGR1	synaptogyrin 1
TC0X00008911.hg.1	10.86	9.7	2.22	0.0276	P2RY8	purinergic receptor P2Y, G-protein coupled, 8
TC0Y00006887.hg.1	10.86	9.7	2.22	0.0276	P2RY8	Homo sapiens purinergic receptor P2Y, G-protein coupled, 8 (P2RY8), mRNA.; purinergic receptor P2Y, G-protein coupled, 8 [Source:HGNC Symbol;Acc:HGNC:15524]; Homo sapiens purinergic receptor P2Y, G-protein coupled, 8, mRNA (cDNA clone MGC:50878 IMAGE:5787268), complete cds.
TC1800007431.hg.1	11.37	9.67	3.25	0.028	MALT1	MALT1 paracaspase
TC0200008464.hg.1	5.79	4.02	3.4	0.0282	KCNIP3	Kv channel interacting protein 3, calsenilin
TC1000011040.hg.1	8.76	7.49	2.41	0.0283	CAMK2G	calcium/calmodulin-dependent protein kinase II gamma
TC0600006873.hg.1	8.33	5.09	9.43	0.0286	BMP6	bone morphogenetic protein 6
TC0900011992.hg.1	9.3	8.2	2.15	0.0288	AGPAT2	1-acylglycerol-3-phosphate O-acyltransferase 2
TC0200015793.hg.1	5.88	4.87	2.02	0.0288	OBSL1	obscurin-like 1
TC0600014105.hg.1	12.58	11.41	2.24	0.0291	C2	complement component 2
TC1000007976.hg.1	5.05	3.93	2.17	0.0292	CHST3	carbohydrate (chondroitin 6) sulfotransferase 3
TC0X00007480.hg.1	4.88	3.84	2.06	0.0293	HEPH	hephaestin
TC0500012587.hg.1	7.96	6.91	2.08	0.03	TIMD4	T-cell immunoglobulin and mucin domain containing 4
TC0900006739.hg.1	3.88	5.02	-2.2	0.0303	CNTLN	Transcript Identified by AceView, Entrez Gene ID(s) 54875
TC0900008286.hg.1	9.65	10.7	-2.07	0.0305	SMC2	structural maintenance of chromosomes 2
TC0500012760.hg.1	5.98	4.61	2.59	0.0305	SLIT3	slit guidance ligand 3
TC1000010995.hg.1	4.75	5.82	-2.11	0.0307	MICU1	mitochondrial calcium uptake 1
TC0600007565.hg.1	8.34	9.37	-2.03	0.0308	TCF19	transcription factor 19
TC0600007855.hg.1	11.39	12.49	-2.15	0.031	FGD2	FYVE, RhoGEF and PH domain containing 2
TC0100011382.hg.1	4.84	3.52	2.5	0.0316	DYRK3	dual specificity tyrosine-(Y)-phosphorylation regulated kinase 3
TC1200012016.hg.1	8.26	9.35	-2.12	0.0317	TBX3	T-box 3
TC1900010543.hg.1	4.33	5.5	-2.26	0.032	ZNF829	zinc finger protein 829
TC2000007246.hg.1	8.63	7.48	2.22	0.032	DLGAP4	discs, large (Drosophila) homolog-associated protein 4
TC0200007609.hg.1	8.33	6.3	4.07	0.0324	SPTBN1	spectrin, beta, non-erythrocytic 1
TC0300013555.hg.1	9.84	8.04	3.49	0.0325	MB21D2	Mab-21 domain containing 2
TC0100018443.hg.1	6.38	4.86	2.88	0.0325	PLPP3	phospholipid phosphatase 3
TC1700008769.hg.1	8.6	9.69	-2.12	0.0327	KCNJ2	potassium channel, inwardly rectifying subfamily J, member 2
TC0400011175.hg.1	5.92	4.64	2.44	0.0328	TMEM150C	transmembrane protein 150C
TC2000007283.hg.1	10.87	9.44	2.71	0.0333	SRC	SRC proto-oncogene, non-receptor tyrosine kinase
TC1600010756.hg.1	6.88	5.71	2.25	0.0334	ST3GAL2	ST3 beta-galactoside alpha-2,3-sialyltransferase 2
TC1600010168.hg.1	11.19	12.42	-2.35	0.0334	SHCBP1	SHC SH2-domain binding protein 1
TC2200007427.hg.1	3.88	5.11	-2.34	0.0336	TNRC6B	Transcript Identified by AceView, Entrez Gene ID(s) 23112
TC1200007037.hg.1	6.44	3.29	8.88	0.0336	PDE3A	phosphodiesterase 3A, cGMP-inhibited
TC0600013409.hg.1	7.2	5.07	4.39	0.0338	HIVEP2	human immunodeficiency virus type I enhancer binding protein 2
TC0100015784.hg.1	5.77	4.6	2.25	0.0339	SELENBP1	selenium binding protein 1
TC0500007114.hg.1	9.7	7.79	3.75	0.0339	RAI14	retinoic acid induced 14
TC1800006749.hg.1	7.61	8.65	-2.06	0.034	CEP192	centrosomal protein 192kDa
TC0500007138.hg.1	15.51	14.15	2.57	0.0344	IL7R	interleukin 7 receptor
TC1200011567.hg.1	7.55	5.88	3.18	0.0345	TMCC3; MIR7844	transmembrane and coiled-coil domain family 3; microRNA 7844
TC0300013949.hg.1	11.35	9.84	2.85	0.0346	SATB1	SATB homeobox 1
TC0100013700.hg.1	9.37	10.41	-2.05	0.0349	CLSPN	claspin
TC0900007129.hg.1	10.68	11.83	-2.22	0.035	MELK	maternal embryonic leucine zipper kinase
TC0100017984.hg.1	8.52	7.41	2.15	0.0352	AKT3	v-akt murine thymoma viral oncogene homolog 3
TC2000007005.hg.1	6.45	4.75	3.24	0.0357	CST7	cystatin F (leukocystatin)
TC0400006538.hg.1	11.64	12.64	-2	0.0358	TACC3	transforming, acidic coiled-coil containing protein 3
TC0600012747.hg.1	8.74	7.11	3.09	0.0358	CD24	CD24 molecule
TC0700013584.hg.1	10.74	9.55	2.29	0.036	CYP51A1	cytochrome P450, family 51, subfamily A, polypeptide 1
TC0300007645.hg.1	7.58	6.42	2.24	0.0361	PTPRG	protein tyrosine phosphatase, receptor type, G
TC0200016743.hg.1	4.61	3.36	2.38	0.0366	ITGB6	integrin beta 6
TC1100008354.hg.1	5.74	4.41	2.52	0.0368	LINC01537	long intergenic non-protein coding RNA 1537
TC0400010282.hg.1	9.35	7.02	5.03	0.0371	SEL1L3	sel-1 suppressor of lin-12-like 3 (C. elegans)
TC2000008852.hg.1	10.57	9.39	2.27	0.0371	NOL4L	nucleolar protein 4-like
TC0500011100.hg.1	9.7	10.77	-2.09	0.0372	ZNF366	zinc finger protein 366
TC0200010811.hg.1	7.67	6.5	2.25	0.0377	CYP27A1	cytochrome P450, family 27, subfamily A, polypeptide 1
TC1500008175.hg.1	8.1	6.96	2.2	0.0379	PDE8A	phosphodiesterase 8A
TC0100008625.hg.1	9.57	7.36	4.61	0.0387	PDE4B	phosphodiesterase 4B, cAMP-specific
TC0100016891.hg.1	8.37	9.56	-2.27	0.0389	KIF14	kinesin family member 14
TC0500010553.hg.1	14.26	15.36	-2.15	0.0389	FYB	FYN binding protein
TC0700010854.hg.1	7.65	6.2	2.73	0.039	INHBA	inhibin beta A
TC0900008219.hg.1	7.89	4.73	8.93	0.0392	NR4A3	nuclear receptor subfamily 4, group A, member 3
TC1300008760.hg.1	8.14	9.15	-2.01	0.0393	EPSTI1	epithelial stromal interaction 1 (breast)
TC1200010516.hg.1	8.73	7.23	2.84	0.0399	SLC38A1	solute carrier family 38, member 1
TC0600009459.hg.1	5.31	4	2.49	0.0399	ENPP1	ectonucleotide pyrophosphatase/phosphodiesterase 1
TC1200010022.hg.1	3.93	2.75	2.26	0.04	MGP	matrix Gla protein
TC1500007615.hg.1	3.93	4.99	-2.08	0.0402	MAP2K1	Transcript Identified by AceView, Entrez Gene ID(s) 5604
TC1400008767.hg.1	7.15	6.02	2.2	0.0402	STXBP6	syntaxin binding protein 6 (amisyn)
TC0600008006.hg.1	8.78	7.55	2.35	0.0403	FOXP4; MIR4641	forkhead box P4; microRNA 4641
TC1000010909.hg.1	5.24	4.22	2.02	0.0404	AIFM2	apoptosis-inducing factor, mitochondrion-associated, 2
TC0800011620.hg.1	11.56	10.33	2.35	0.0406	ENPP2	ectonucleotide pyrophosphatase/phosphodiesterase 2
TC1700012382.hg.1	7.62	8.66	-2.07	0.041	OMG	oligodendrocyte myelin glycoprotein
TC1500006965.hg.1	6.71	7.8	-2.14	0.0415	RAD51	RAD51 recombinase
TC2000009218.hg.1	9.14	7.28	3.64	0.0422	SDC4	syndecan 4
TC0300010427.hg.1	12.89	11.72	2.25	0.0422	RFTN1	raftlin, lipid raft linker 1
TC0X00009707.hg.1	6.83	5.02	3.49	0.0424	MAGED4; MAGED4B; SNORA11D; SNORA11E	melanoma antigen family D4; melanoma antigen family D4B; small nucleolar RNA, H/ACA box 11D; small nucleolar RNA, H/ACA box 11E
TC1200008667.hg.1	4.61	5.96	-2.55	0.0424	HSP90B1	Transcript Identified by AceView, Entrez Gene ID(s) 7184
TC1000007199.hg.1	6.83	5.51	2.49	0.0426	ZEB1	zinc finger E-box binding homeobox 1
TC1100013109.hg.1	10.42	7.92	5.64	0.0427	GRAMD1B	GRAM domain containing 1B
TC2000009604.hg.1	7.38	5.8	3	0.0433	PMEPA1	prostate transmembrane protein, androgen induced 1
TC1600011186.hg.1	11.51	10.16	2.55	0.0436	SLC7A5	solute carrier family 7 (amino acid transporter light chain, L system), member 5
TC0500011596.hg.1	6.49	3.73	6.78	0.0437	SLCO4C1	solute carrier organic anion transporter family, member 4C1
TC0900008811.hg.1	10.85	9.73	2.18	0.0439	STXBP1	syntaxin binding protein 1
TC0600010825.hg.1	10.8	9.2	3.05	0.0444	ADTRP	androgen-dependent TFPI-regulating protein
TC1400008362.hg.1	11.41	9.92	2.8	0.0444	TRAF3	TNF receptor-associated factor 3
TC0600010609.hg.1	12.56	11.26	2.46	0.0446	PXDC1	PX domain containing 1
TC2200008741.hg.1	8.72	7.69	2.04	0.0451	PDGFB	platelet-derived growth factor beta polypeptide
TC0400006951.hg.1	9.72	11.79	-4.21	0.0457	CD38	CD38 molecule
TC0200012429.hg.1	4.69	6.22	-2.88	0.0457	PPM1B	Memczak2013 ANTISENSE, coding, INTERNAL, intronic best transcript NM_001033556
TC1900009832.hg.1	5.45	4.18	2.41	0.0459	ADGRE3	adhesion G protein-coupled receptor E3
TC1300007148.hg.1	4.65	5.68	-2.05	0.0459	CYSLTR2	cysteinyl leukotriene receptor 2
TC1900011449.hg.1	9.04	7.96	2.11	0.0463	TNNT1	troponin T type 1 (skeletal, slow)
TC0400011014.hg.1	13.13	14.14	-2.02	0.0466	CXCL5	chemokine (C-X-C motif) ligand 5
TC1700007558.hg.1	7.15	8.23	-2.12	0.0473	CCL7	chemokine (C-C motif) ligand 7
TC0500007201.hg.1	5.71	4.64	2.11	0.0477	OSMR	oncostatin M receptor
TC0700010719.hg.1	6.43	5.33	2.14	0.048	TBX20	T-box 20
TC1000008396.hg.1	7.37	8.61	-2.37	0.0481	IFIT2	interferon-induced protein with tetratricopeptide repeats 2
TC1100013022.hg.1	15.35	14.17	2.26	0.0485	FADS2	fatty acid desaturase 2
TC0100007451.hg.1	8.68	6.04	6.26	0.049	CD52	CD52 molecule
TC1500009036.hg.1	9.08	7.95	2.18	0.049	MEIS2	Meis homeobox 2
TC0100008815.hg.1	4.34	6.28	-3.85	0.049	IFI44L	interferon-induced protein 44-like
TC0400010785.hg.1	10.04	7.19	7.25	0.0491	IGFBP7	insulin like growth factor binding protein 7
TC1400010758.hg.1	3.59	4.71	-2.17	0.0496	CCDC175	coiled-coil domain containing 175
TC1100010349.hg.1	5.29	4.25	2.05	0.0499	SVIP	small VCP/p97-interacting protein
