# Supplementary material for: C5a Activates a Pro-Inflammatory Gene Expression Profile in Human Gaucher iPSC-Derived Macrophages
Source: Int J Mol Sci. 2021 Sep 14;22(18):9912. doi: 10.3390/ijms22189912 (PMC8466165; doi:10.3390/ijms22189912)
Supplement: Supplementary file 1 [file ijms-22-09912-s001.zip › Supplemental Table S3B.xlsx]

## Sheet: Sheet1
ClariomTM S Assay Transcript Cluster (TC) ID	C5a stimulated control Avg (log2)	C5a stimulated GD Avg (log2)	Fold Change	P-val	Gene Symbol	Description
TC0100008637.hg.1	7.27	12.59	-40.06	2.78e-08	TCTEX1D1	Tctex1 domain containing 1
TC0800012143.hg.1	4.8	8.93	-17.53	6.9e-08	NAPRT	nicotinate phosphoribosyltransferase
TC1500010744.hg.1	9.66	5.41	19.03	3.21e-07	GCOM1; MYZAP; POLR2M	GRINL1A complex locus 1; myocardial zonula adherens protein; polymerase (RNA) II (DNA directed) polypeptide M
TC2000007942.hg.1	6.44	9.73	-9.77	5.35e-07	FAM217B	family with sequence similarity 217, member B
TC1900009684.hg.1	13.41	8.88	23.14	9.76e-07	ACP5	acid phosphatase 5, tartrate resistant
TC0600013205.hg.1	11.17	6.14	32.76	1.05e-06	VNN2	vanin 2
TC1100007257.hg.1	10.42	7.44	7.9	1.07e-06	CAT	catalase
TC0600014273.hg.1	12.09	6.07	64.71	1.32e-06	HLA-DRB1	major histocompatibility complex, class II, DR beta 1
TC1400007706.hg.1	8.77	12.36	-11.98	1.4e-06	FOS	FBJ murine osteosarcoma viral oncogene homolog
TC0400009090.hg.1	7.92	11.57	-12.64	1.45e-06	TDO2	tryptophan 2,3-dioxygenase
TC0700006913.hg.1	17.23	14.79	5.43	1.73e-06	GPNMB	glycoprotein (transmembrane) nmb
TC0600007650.hg.1	13.59	7.59	63.84	1.82e-06	HLA-DRA	major histocompatibility complex, class II, DR alpha
TC0300013932.hg.1	7.56	5.45	4.33	3.02e-06	SRGAP3	SLIT-ROBO Rho GTPase activating protein 3
TC1100009524.hg.1	10.99	8.86	4.36	3.39e-06	ST14	suppression of tumorigenicity 14 (colon carcinoma)
TC0600011517.hg.1	8.82	4.49	20.09	3.78e-06	HLA-DPA1	major histocompatibility complex, class II, DP alpha 1
TC0100015211.hg.1	9.07	6.13	7.65	4.14e-06	GSTM3	glutathione S-transferase mu 3 (brain)
TC1200012417.hg.1	5.05	9.52	-22.12	4.2e-06	SLC15A4	solute carrier family 15 (oligopeptide transporter), member 4
TC0700011584.hg.1	13.65	10.74	7.54	4.45e-06	FGL2	fibrinogen-like 2
TC0600011491.hg.1	7.43	5.03	5.28	4.56e-06	HLA-DRB5	major histocompatibility complex, class II, DR beta 5
TC0300012676.hg.1	6.44	8.75	-4.96	4.69e-06	PCOLCE2	procollagen C-endopeptidase enhancer 2
TC2000009674.hg.1	4.81	6.92	-4.3	4.77e-06	PPP1R3D	protein phosphatase 1, regulatory subunit 3D
TC0600006967.hg.1	7.44	10.21	-6.86	4.86e-06	EDN1	endothelin 1
TC1900008885.hg.1	8.8	4.53	19.28	5.42e-06	NLRP2	NLR family, pyrin domain containing 2
TC0200014361.hg.1	8.19	5.21	7.9	6.16e-06	LYPD1	LY6/PLAUR domain containing 1
TC2100007852.hg.1	4.52	7.54	-8.14	7.87e-06	RWDD2B	RWD domain containing 2B
TC1000011376.hg.1	4.27	7.92	-12.51	1e-05	CH25H	cholesterol 25-hydroxylase
TC0900008776.hg.1	7.88	4.89	7.91	1.08e-05	MVB12B	multivesicular body subunit 12B
TC2000007083.hg.1	7.37	10.64	-9.63	1.27e-05	ID1	inhibitor of DNA binding 1, dominant negative helix-loop-helix protein
TC0700013368.hg.1	6.34	9.28	-7.64	1.27e-05	ZNF736	zinc finger protein 736
TC1900007853.hg.1	5.05	7.38	-5	1.44e-05	GPR42	G protein-coupled receptor 42 (gene/pseudogene)
TC1700010393.hg.1	8.75	13.26	-22.71	1.49e-05	CCL1	chemokine (C-C motif) ligand 1
TC0100006675.hg.1	13.35	11.38	3.91	1.52e-05	KCNAB2	potassium channel, voltage gated subfamily A regulatory beta subunit 2
TC1200008346.hg.1	3.36	5.6	-4.72	1.56e-05	ALX1	ALX homeobox 1
TC1700011815.hg.1	8.24	10.55	-4.93	1.73e-05	MXRA7	matrix-remodelling associated 7
TC0800009856.hg.1	5.84	9.66	-14.11	1.75e-05	EGR3	early growth response 3
TC0500008785.hg.1	8.21	13.53	-39.97	1.77e-05	EGR1	early growth response 1
TC1800008628.hg.1	7.31	5.3	4.05	1.78e-05	ZBTB7C	zinc finger and BTB domain containing 7C
TC0300010082.hg.1	6.61	8.34	-3.32	1.96e-05	FAM157A	family with sequence similarity 157, member A
TC0400010258.hg.1	9.05	6.72	5.03	2.09e-05	LGI2	leucine-rich repeat LGI family, member 2
TC1000010593.hg.1	9.61	7.75	3.63	2.1e-05	C10orf128	chromosome 10 open reading frame 128
TC0600014276.hg.1	10.76	8.28	5.57	2.3e-05	HLA-DMB	major histocompatibility complex, class II, DM beta
TC0200015211.hg.1	12.81	9.94	7.35	2.34e-05	SLC40A1	solute carrier family 40 (iron-regulated transporter), member 1
TC2100006784.hg.1	6.27	10.01	-13.39	2.52e-05	JAM2	junctional adhesion molecule 2
TC0600007677.hg.1	10.35	7.1	9.54	2.6e-05	HLA-DPB1	major histocompatibility complex, class II, DP beta 1
TC1900007127.hg.1	7.97	10.87	-7.47	2.63e-05	IER2	immediate early response 2
TC1000008054.hg.1	12.13	10.31	3.52	2.74e-05	PLAU	plasminogen activator, urokinase
TC0200008005.hg.1	6.9	9.17	-4.86	2.94e-05	DYSF	dysferlin
TC0200014204.hg.1	9.15	7.54	3.07	2.96e-05	HS6ST1	heparan sulfate 6-O-sulfotransferase 1
TC0400011535.hg.1	8.11	11.83	-13.2	3.06e-05	DKK2	dickkopf WNT signaling pathway inhibitor 2
TC1600006888.hg.1	10.94	6.57	20.68	3.22e-05	CIITA	class II, major histocompatibility complex, transactivator
TC1100012131.hg.1	8.8	13.01	-18.63	3.27e-05	MMP1	matrix metallopeptidase 1
TC1300009348.hg.1	8.07	9.8	-3.32	3.44e-05	SPRY2	sprouty RTK signaling antagonist 2
TC0200010811.hg.1	9.7	5.72	15.72	3.45e-05	CYP27A1	cytochrome P450, family 27, subfamily A, polypeptide 1
TC0200008663.hg.1	12.93	8.5	21.55	3.52e-05	IL1R2	interleukin 1 receptor, type II
TC0500009109.hg.1	5.04	7.3	-4.79	3.71e-05	GPX3	glutathione peroxidase 3
TC0100013315.hg.1	6.83	9.26	-5.38	3.86e-05	IFNLR1	interferon, lambda receptor 1
TC1900011259.hg.1	10.3	6.54	13.63	3.9e-05	SIGLEC12	sialic acid binding Ig-like lectin 12 (gene/pseudogene)
TC0700013354.hg.1	12.25	9.92	5.03	4.17e-05	GPR141	G protein-coupled receptor 141
TC1100013015.hg.1	9.77	12.2	-5.37	4.51e-05	MS4A14	membrane-spanning 4-domains, subfamily A, member 14
TC0100008752.hg.1	5.5	8.79	-9.76	4.51e-05	TYW3	tRNA-yW synthesizing protein 3 homolog (S. cerevisiae)
TC0100007564.hg.1	10.15	8.73	2.69	4.68e-05	RAB42	RAB42, member RAS oncogene family
TC1500009214.hg.1	6.36	4.92	2.71	5.05e-05	TGM5	transglutaminase 5
TC0500007826.hg.1	13.02	11.32	3.24	5.33e-05	IQGAP2	IQ motif containing GTPase activating protein 2
TC1500009737.hg.1	5.03	8.07	-8.19	5.41e-05	PPIB	Jeck2013 ALT_ACCEPTOR, ALT_DONOR, coding, INTERNAL, intronic, OVERLAPTX, OVEXON best transcript NM_000942
TC1200006779.hg.1	9.47	7.66	3.51	5.55e-05	CLEC12A	C-type lectin domain family 12, member A
TC1000011114.hg.1	8.89	6.3	6.03	5.59e-05	KCNMA1	potassium channel, calcium activated large conductance subfamily M alpha, member 1
TC1700006524.hg.1	12.56	7.96	24.25	5.9e-05	SERPINF1	serpin peptidase inhibitor, clade F (alpha-2 antiplasmin, pigment epithelium derived factor), member 1
TC0600008697.hg.1	7.56	10.07	-5.72	6.27e-05	NT5E	5-nucleotidase, ecto (CD73)
TC0700008292.hg.1	5.89	7.28	-2.62	6.45e-05	STEAP1	six transmembrane epithelial antigen of the prostate 1
TC0900008425.hg.1	5.92	7.48	-2.94	6.93e-05	ZNF483	zinc finger protein 483
TC0800012371.hg.1	7.78	10.54	-6.8	6.99e-05	LY6E	lymphocyte antigen 6 complex, locus E
TC1100012219.hg.1	8.8	7.3	2.82	7.06e-05	SLC35F2	solute carrier family 35, member F2
TC0700011977.hg.1	11.04	8.98	4.18	7.14e-05	GAL3ST4	galactose-3-O-sulfotransferase 4
TC1400006540.hg.1	12.06	14.28	-4.65	7.75e-05	RNASE2	ribonuclease, RNase A family, 2 (liver, eosinophil-derived neurotoxin)
TC0200016560.hg.1	4	5.92	-3.79	7.86e-05	KLHL41	kelch-like family member 41
TC0200012404.hg.1	14.54	13.16	2.59	8.02e-05	ZFP36L2	ZFP36 ring finger protein-like 2
TC1100011083.hg.1	11.74	8.87	7.32	8.27e-05	AHNAK	AHNAK nucleoprotein
TC0800008146.hg.1	5.29	6.82	-2.89	8.48e-05	WWP1	Transcript Identified by AceView, Entrez Gene ID(s) 11059
TC0100015754.hg.1	12.18	8.98	9.18	8.53e-05	CTSK	cathepsin K
TC1700006449.hg.1	5.25	6.75	-2.84	8.59e-05	C17orf97	chromosome 17 open reading frame 97
TC1800007508.hg.1	6.26	8.89	-6.19	8.61e-05	TNFRSF11A	Transcript Identified by AceView, Entrez Gene ID(s) 8792
TC0200007717.hg.1	8.09	9.65	-2.93	8.74e-05	AHSA2	AHA1, activator of heat shock 90kDa protein ATPase homolog 2 (yeast)
TC0500012567.hg.1	10.16	8.72	2.7	9.04e-05	FAXDC2	fatty acid hydroxylase domain containing 2
TC1000006802.hg.1	9.27	7.46	3.51	9.32e-05	CAMK1D	calcium/calmodulin-dependent protein kinase ID
TC1200012707.hg.1	12.81	10.85	3.88	9.98e-05	ALDH2	aldehyde dehydrogenase 2 family (mitochondrial)
TC1700012353.hg.1	6.12	7.65	-2.88	0.0001	PER1; MIR6883	period circadian clock 1; microRNA 6883
TC0800010938.hg.1	4.09	6.64	-5.88	0.0001	FABP4	fatty acid binding protein 4, adipocyte
TC1700010358.hg.1	9.62	7.57	4.15	0.0001	MYO1D	myosin ID
TC1200011207.hg.1	12.05	10.8	2.37	0.0001	CPM	carboxypeptidase M
TC0200010745.hg.1	8.42	5.87	5.84	0.0001	IGFBP2	insulin like growth factor binding protein 2
TC0900010586.hg.1	7.64	10.43	-6.88	0.0001	C9orf64	chromosome 9 open reading frame 64
TC0800008140.hg.1	12.26	10.85	2.65	0.0001	ATP6V0D2	ATPase, H+ transporting, lysosomal 38kDa, V0 subunit d2
TC0X00007378.hg.1	6.83	5.49	2.53	0.0001	MAGEH1	MAGE family member H1
TC0700009682.hg.1	8.11	5.98	4.35	0.0001	AOC1	amine oxidase, copper containing 1
TC2200007271.hg.1	14.25	12.6	3.13	0.0001	NCF4	neutrophil cytosolic factor 4
TC1900011801.hg.1	13.13	10.69	5.41	0.0001	LILRB4	leukocyte immunoglobulin-like receptor, subfamily B (with TM and ITIM domains), member 4
TC0800009735.hg.1	11.91	13.77	-3.62	0.0001	MTUS1	microtubule associated tumor suppressor 1
TC0600014360.hg.1	11.72	13.85	-4.36	0.0001	IPCEF1	interaction protein for cytohesin exchange factors 1
TC0X00011238.hg.1	6.12	4.31	3.52	0.0001	CLIC2	chloride intracellular channel 2
TC0500010766.hg.1	8.94	7.66	2.43	0.0001	PLPP1; RNF138P1	phospholipid phosphatase 1; ring finger protein 138, E3 ubiquitin protein ligase pseudogene 1
TC1700011708.hg.1	8.3	6.61	3.23	0.0001	CD300LF	CD300 molecule-like family member f
TC0900010388.hg.1	5.21	7.22	-4.03	0.0001	TMEM2	Transcript Identified by AceView, Entrez Gene ID(s) 23670
TC0X00009025.hg.1	7.64	11.34	-13	0.0002	ANOS1	anosmin 1
TC0500010670.hg.1	8.82	7.17	3.14	0.0002	EMB	embigin
TC0100016631.hg.1	6.75	10.53	-13.73	0.0002	RGS16	regulator of G-protein signaling 16
TC0200014620.hg.1	6.41	7.95	-2.91	0.0002	CACNB4	calcium channel, voltage-dependent, beta 4 subunit
TC1600011578.hg.1	8.38	9.93	-2.94	0.0002	FBXO31	F-box protein 31
TC1200008133.hg.1	16.14	14.66	2.79	0.0002	LYZ	lysozyme
TSUnmapped00000255.hg.1	7.16	8.72	-2.94	0.0002	KIF15	kinesin family member 15
TC0600013431.hg.1	9.56	10.98	-2.69	0.0002	PLAGL1; HYMAI	pleiomorphic adenoma gene-like 1; hydatidiform mole associated and imprinted (non-protein coding)
TC0300010913.hg.1	9.05	10.95	-3.73	0.0002	CDCP1	CUB domain containing protein 1
TC1200011786.hg.1	7.91	9.73	-3.55	0.0002	NUAK1	NUAK family, SNF1-like kinase, 1
TC0300008242.hg.1	12.64	13.8	-2.23	0.0002	ALCAM	activated leukocyte cell adhesion molecule
TC0600007585.hg.1	12.29	13.61	-2.5	0.0002	MICB	MHC class I polypeptide-related sequence B
TC0800011249.hg.1	8.88	10.66	-3.42	0.0002	RNF19A	ring finger protein 19A, RBR E3 ubiquitin protein ligase
TC0100008243.hg.1	9.26	11.81	-5.88	0.0002	ELAVL4	ELAV like neuron-specific RNA binding protein 4
TC1300010037.hg.1	7.07	8.67	-3.05	0.0002	KIAA0226L	KIAA0226-like
TC1600009184.hg.1	4.68	6.02	-2.52	0.0002	ZNF200	Transcript Identified by AceView, Entrez Gene ID(s) 7752
TC1300008468.hg.1	9.46	7.45	4.03	0.0002	SLC46A3	solute carrier family 46, member 3
TC0800009816.hg.1	12.04	7.74	19.63	0.0002	GFRA2	GDNF family receptor alpha 2
TSUnmapped00000053.hg.1	6.65	7.94	-2.44	0.0002	RPL7A	ribosomal protein L7a
TC1500010128.hg.1	10.83	9.18	3.14	0.0002	TBC1D2B	TBC1 domain family, member 2B
TC2100007446.hg.1	10.89	8.38	5.69	0.0002	COL6A1	collagen, type VI, alpha 1
TC1600009683.hg.1	14.25	12.74	2.85	0.0002	IGSF6	immunoglobulin superfamily, member 6
TC1400007584.hg.1	8.17	6.74	2.69	0.0002	TTC9	tetratricopeptide repeat domain 9
TC0100014349.hg.1	11.32	9.87	2.72	0.0002	JUN	jun proto-oncogene
TC0300013827.hg.1	9.67	8.45	2.34	0.0002	WDR6	WD repeat domain 6
TC0300013913.hg.1	7.32	10.06	-6.7	0.0002	TPRG1	tumor protein p63 regulated 1
TC1900007852.hg.1	5.49	7.67	-4.53	0.0002	FFAR3	free fatty acid receptor 3
TC0900010387.hg.1	4.35	6.07	-3.3	0.0002	TMEM2	Transcript Identified by AceView, Entrez Gene ID(s) 23670
TC1500010737.hg.1	9.36	12.29	-7.59	0.0002	SQRDL	sulfide quinone reductase-like (yeast)
TSUnmapped00000330.hg.1	4.83	3.61	2.33	0.0003	ZNF502	zinc finger protein 502
TC2100007451.hg.1	9.6	6.08	11.44	0.0003	COL6A2	collagen, type VI, alpha 2
TC1000007913.hg.1	8.67	6.39	4.85	0.0003	H2AFY2	H2A histone family, member Y2
TC0X00006593.hg.1	9.85	8.32	2.89	0.0003	CLCN4	chloride channel, voltage-sensitive 4
TC0200016651.hg.1	14.72	13.46	2.39	0.0003	CYP1B1	cytochrome P450, family 1, subfamily B, polypeptide 1
TC0800006439.hg.1	4.63	5.86	-2.35	0.0003	ZNF596	zinc finger protein 596
TC0400006598.hg.1	10.84	9.22	3.06	0.0003	RGS12	regulator of G-protein signaling 12
TC2100008030.hg.1	11.93	13.12	-2.29	0.0003	RCAN1	regulator of calcineurin 1
TC0300013914.hg.1	5.61	7.06	-2.73	0.0003	TPRG1	tumor protein p63 regulated 1
TC0900006559.hg.1	7.7	5.73	3.93	0.0003	CD274	CD274 molecule
TC1900007679.hg.1	9.87	8.24	3.08	0.0003	PLEKHF1	pleckstrin homology domain containing, family F (with FYVE domain) member 1
TC2200007672.hg.1	11.15	9.73	2.68	0.0003	GRAMD4	GRAM domain containing 4
TC0100009558.hg.1	11.81	10.74	2.1	0.0003	PTGFRN	prostaglandin F2 receptor inhibitor
TC1200012807.hg.1	10.35	8.99	2.57	0.0003	STAC3	SH3 and cysteine rich domain 3
TC0500012470.hg.1	13.9	11.93	3.93	0.0003	CD74	CD74 molecule, major histocompatibility complex, class II invariant chain
TC0400011429.hg.1	7.97	12.5	-23.05	0.0003	DDIT4L	DNA-damage-inducible transcript 4-like
TC0300010399.hg.1	11.37	9.84	2.89	0.0003	SH3BP5	SH3-domain binding protein 5 (BTK-associated)
TC0700009675.hg.1	9.74	8.19	2.93	0.0003	GIMAP8	GTPase, IMAP family member 8
TC1900011057.hg.1	5.67	7.45	-3.45	0.0003	PLA2G4C	phospholipase A2, group IVC (cytosolic, calcium-independent)
TSUnmapped00000463.hg.1	5.67	7.48	-3.49	0.0003	RPS25	ribosomal protein S25
TC0X00009580.hg.1	6.91	4.87	4.1	0.0003	CFP	complement factor properdin
TC2000006861.hg.1	12.61	14.36	-3.36	0.0003	RIN2	Ras and Rab interactor 2
TC0600014277.hg.1	11.91	9.65	4.8	0.0003	HLA-DMA	major histocompatibility complex, class II, DM alpha
TC1000008767.hg.1	12.07	13.64	-2.98	0.0003	INA	internexin neuronal intermediate filament protein, alpha
TC0700010751.hg.1	13.51	11.83	3.2	0.0003	AOAH	acyloxyacyl hydrolase (neutrophil)
TC1200010407.hg.1	3.23	4.98	-3.36	0.0003	KIF21A	kinesin family member 21A
TC0900006560.hg.1	9.28	6.59	6.45	0.0004	PDCD1LG2	programmed cell death 1 ligand 2
TC0100007206.hg.1	5.66	3.26	5.28	0.0004	CDA	cytidine deaminase
TC1800007506.hg.1	11.95	13.15	-2.3	0.0004	TNFRSF11A	tumor necrosis factor receptor superfamily, member 11a, NFKB activator
TC0700013581.hg.1	5.03	6.91	-3.67	0.0004	STEAP4	STEAP family member 4
TC1400010774.hg.1	11.99	10.95	2.06	0.0004	FOXN3	forkhead box N3
TC0100006862.hg.1	7.87	6.48	2.62	0.0004	FBXO6	F-box protein 6
TC1900010286.hg.1	11.34	10.11	2.34	0.0004	UQCRFS1	ubiquinol-cytochrome c reductase, Rieske iron-sulfur polypeptide 1
TC0500013342.hg.1	12.1	13.25	-2.21	0.0004	ERAP1	endoplasmic reticulum aminopeptidase 1
TC1000007954.hg.1	11.02	9.56	2.73	0.0004	SLC29A3	solute carrier family 29 (equilibrative nucleoside transporter), member 3
TC0300008563.hg.1	11.74	10.69	2.07	0.0004	DIRC2	disrupted in renal carcinoma 2
TC0800007221.hg.1	6.76	5.08	3.21	0.0004	NRG1	neuregulin 1
TC0100016065.hg.1	7.54	8.85	-2.48	0.0004	CD1B	CD1b molecule
TC0900011241.hg.1	5.36	7.96	-6.07	0.0004	SLC46A2	solute carrier family 46, member 2
TC0500007491.hg.1	12.96	10.48	5.56	0.0004	GAPT	GRB2-binding adaptor protein, transmembrane
TC0Y00006730.hg.1	8.9	9.96	-2.08	0.0004	EIF1AY	eukaryotic translation initiation factor 1A, Y-linked
TC2000006642.hg.1	6.82	9.28	-5.51	0.0004	BMP2	bone morphogenetic protein 2
TC1200011002.hg.1	5.6	7.24	-3.13	0.0004	LRIG3	leucine-rich repeats and immunoglobulin-like domains 3
TC1700009651.hg.1	12.06	10.4	3.17	0.0004	TP53	tumor protein p53
TC1100006998.hg.1	12.97	11.69	2.42	0.0004	GTF2H1	general transcription factor IIH subunit 1
TC0100017113.hg.1	7.33	8.92	-3.02	0.0004	PIGR	polymeric immunoglobulin receptor
TC2000006622.hg.1	7.79	9.29	-2.83	0.0004	C20orf196	chromosome 20 open reading frame 196
TC0500012937.hg.1	9	10.27	-2.41	0.0004	NOP16	NOP16 nucleolar protein
TC1100013072.hg.1	9.24	8.02	2.34	0.0004	NEU3	sialidase 3 (membrane sialidase)
TC0100008874.hg.1	10.42	9.12	2.47	0.0004	PRKACB	protein kinase, cAMP-dependent, catalytic, beta
TC1100009306.hg.1	9.72	8.24	2.79	0.0005	SC5D	sterol-C5-desaturase
TC1100010730.hg.1	14.98	13.91	2.11	0.0005	ACP2	acid phosphatase 2, lysosomal
TC0100018045.hg.1	7.43	6.16	2.41	0.0005	SMYD3	SET and MYND domain containing 3
TC1200011310.hg.1	10.82	13.25	-5.41	0.0005	PHLDA1	pleckstrin homology-like domain, family A, member 1
TC1500007851.hg.1	7.88	6.01	3.66	0.0005	ARID3B	AT rich interactive domain 3B (BRIGHT-like)
TC1200010640.hg.1	7.09	5.88	2.32	0.0005	NCKAP5L	NCK-associated protein 5-like
TC1700009333.hg.1	9.41	7.42	3.98	0.0005	NXN	nucleoredoxin
TC0900010971.hg.1	8.37	6.13	4.71	0.0005	TBC1D2	TBC1 domain family, member 2
TC1700012187.hg.1	12.88	11.65	2.34	0.0005	TNFSF12-TNFSF13	TNFSF12-TNFSF13 readthrough
TC1500010871.hg.1	10.76	9.69	2.1	0.0005	ZNF280D	zinc finger protein 280D
TC1000008063.hg.1	11.67	10.62	2.06	0.0005	ADK; MRPL35P3	adenosine kinase; mitochondrial ribosomal protein L35 pseudogene 3
TC1500010707.hg.1	8.42	9.87	-2.73	0.0006	ARHGAP11B	Rho GTPase activating protein 11B
TC1800009268.hg.1	10.52	8.94	2.99	0.0006	DSC2	desmocollin 2
TC1300008388.hg.1	6.01	7.75	-3.33	0.0006	MTMR6	Transcript Identified by AceView, Entrez Gene ID(s) 9107
TC1500006981.hg.1	5.41	6.45	-2.05	0.0006	DLL4	delta-like 4 (Drosophila)
TC1000007885.hg.1	7.32	9.22	-3.73	0.0006	SRGN	Transcript Identified by AceView, Entrez Gene ID(s) 5552
TC0400007556.hg.1	14.06	12.68	2.61	0.0006	SRD5A3	steroid 5 alpha-reductase 3
TC1200012622.hg.1	12.34	10.91	2.68	0.0006	SLC48A1	solute carrier family 48 (heme transporter), member 1
TC1700007777.hg.1	8.82	7.54	2.42	0.0006	THRA	thyroid hormone receptor, alpha
TC0600013165.hg.1	11.75	10.63	2.17	0.0006	EPB41L2	erythrocyte membrane protein band 4.1-like 2
TC0100011770.hg.1	10.94	8.82	4.36	0.0006	EPHX1	epoxide hydrolase 1, microsomal (xenobiotic)
TC0600012123.hg.1	8.83	7.07	3.38	0.0006	DST	dystonin
TC2000008515.hg.1	5.56	7.99	-5.4	0.0006	SNX5	Jeck2013 ALT_DONOR, coding, INTERNAL, intronic best transcript NM_152227
TC0300009869.hg.1	5.49	3.95	2.9	0.0006	PYDC2	pyrin domain containing 2
TC2200008687.hg.1	10.87	9.56	2.48	0.0006	TMEM184B	transmembrane protein 184B
TC1100011794.hg.1	11.62	10.61	2.01	0.0006	PRCP	prolylcarboxypeptidase
TC0100009555.hg.1	5.02	3.69	2.52	0.0006	CD2	CD2 molecule
TC0800007027.hg.1	6.63	8.15	-2.87	0.0006	SLC25A37	solute carrier family 25 (mitochondrial iron transporter), member 37
TC2000007091.hg.1	4.97	3.92	2.07	0.0006	MYLK2	myosin light chain kinase 2
TC1200008845.hg.1	5.83	7.03	-2.3	0.0006	RAD9B	RAD9 checkpoint clamp component B
TC0300013915.hg.1	5.3	7.12	-3.53	0.0007	TPRG1	tumor protein p63 regulated 1
TC0800009875.hg.1	6.17	7.66	-2.81	0.0007	TNFRSF10A	tumor necrosis factor receptor superfamily, member 10a
TC1000007337.hg.1	8.26	9.44	-2.26	0.0007	ZNF37A	zinc finger protein 37A
TC0900011981.hg.1	8.52	7.45	2.1	0.0007	NOTCH1	notch 1
TC0300009004.hg.1	7.58	8.77	-2.29	0.0007	RASA2	RAS p21 protein activator 2
TC1000009092.hg.1	11.18	9.6	2.98	0.0007	INPP5F	inositol polyphosphate-5-phosphatase F
TC1300009008.hg.1	9.12	7.89	2.35	0.0007	NEK3	NIMA-related kinase 3
TC0X00011139.hg.1	11.15	12.28	-2.19	0.0007	CETN2	centrin 2
TSUnmapped00000241.hg.1	4.55	3.4	2.22	0.0007	ZNF502	zinc finger protein 502
TC1500010709.hg.1	5.75	6.91	-2.23	0.0007	ARHGAP11B	Rho GTPase activating protein 11B
TC0200008099.hg.1	10.91	9.54	2.57	0.0007	HK2	hexokinase 2
TC2200008630.hg.1	7.48	6.48	2	0.0007	TST	thiosulfate sulfurtransferase (rhodanese)
TC1700012340.hg.1	8.08	9.11	-2.04	0.0007	NUP88	nucleoporin 88kDa
TC1300008359.hg.1	11.91	10.5	2.65	0.0007	PARP4	poly(ADP-ribose) polymerase family member 4
TC1800006757.hg.1	8.56	7.17	2.62	0.0007	LDLRAD4	low density lipoprotein receptor class A domain containing 4
TC1400008752.hg.1	6.3	7.84	-2.92	0.0007	CIDEB	cell death-inducing DFFA-like effector b
TC1700012445.hg.1	12.82	11.74	2.11	0.0007	STRADA	STE20-related kinase adaptor alpha
TC1500008616.hg.1	7.77	9.23	-2.75	0.0007	HERC2P3	hect domain and RLD 2 pseudogene 3
TC0700009253.hg.1	7.48	8.62	-2.21	0.0007	NUP205	nucleoporin 205kDa
TC1400006741.hg.1	6.14	4.4	3.33	0.0007	NYNRIN	NYN domain and retroviral integrase containing
TC0100016715.hg.1	7.95	9.69	-3.36	0.0007	PTGS2	prostaglandin-endoperoxide synthase 2 (prostaglandin G/H synthase and cyclooxygenase)
TC0100018551.hg.1	9.95	4.97	31.59	0.0007	CHIT1	chitinase 1 (chitotriosidase)
TC1900007850.hg.1	7.25	5.92	2.52	0.0008	CD22; MIR5196	CD22 molecule; microRNA 5196
TSUnmapped00000290.hg.1	5.05	6.72	-3.19	0.0008	INPP5D	inositol polyphosphate-5-phosphatase D
TC0100007295.hg.1	10.93	9.38	2.93	0.0008	EPHB2	EPH receptor B2
TSUnmapped00000268.hg.1	4.55	5.76	-2.31	0.0008	CCDC84	coiled-coil domain containing 84
TC1900008597.hg.1	9.56	8.19	2.57	0.0008	CLEC11A	C-type lectin domain family 11, member A
TC1800008333.hg.1	10	11.6	-3.03	0.0008	DHFR; DHFRP1	dihydrofolate reductase; dihydrofolate reductase pseudogene 1
TC1300008253.hg.1	11.11	9.87	2.37	0.0008	CRYL1	crystallin lambda 1
TC1100011716.hg.1	3.71	4.84	-2.2	0.0008	GDPD4	glycerophosphodiester phosphodiesterase domain containing 4
TC0100010586.hg.1	6.88	5.82	2.08	0.0008	FMO4	flavin containing monooxygenase 4
TC1200007775.hg.1	4.22	7.18	-7.79	0.0008	MUCL1	mucin-like 1
TC0800010749.hg.1	10.28	9.2	2.12	0.0008	NCOA2	nuclear receptor coactivator 2
TC0300013513.hg.1	9.43	11.52	-4.25	0.0008	P3H2	prolyl 3-hydroxylase 2
TC1200012698.hg.1	9.67	8.52	2.22	0.0009	CHPT1	choline phosphotransferase 1
TC0100007136.hg.1	7.93	6.14	3.47	0.0009	IGSF21	immunoglobin superfamily, member 21
TC0100015401.hg.1	6.34	5.32	2.03	0.0009	IGSF3	immunoglobulin superfamily, member 3
TC1700007771.hg.1	8.84	7.13	3.27	0.0009	GSDMA	gasdermin A
TC0900011220.hg.1	12.05	11.05	2	0.0009	SUSD1	sushi domain containing 1
TC1000007761.hg.1	13.21	14.72	-2.85	0.0009	ARID5B	AT rich interactive domain 5B (MRF1-like)
TC0600007265.hg.1	3.42	5.36	-3.82	0.0009	HIST1H3C	histone cluster 1, H3c
TC1700012339.hg.1	3.33	4.35	-2.03	0.0009	NUP88	nucleoporin 88kDa
TC0500009346.hg.1	6.35	5.31	2.06	0.0009	WWC1	WW and C2 domain containing 1
TC1300006879.hg.1	6.98	5.09	3.7	0.0009	CCNA1	cyclin A1
TC0100014612.hg.1	4.45	6.63	-4.53	0.0009	CRYZ	crystallin zeta
TC0100013076.hg.1	7.89	4.96	7.59	0.001	PADI2	peptidyl arginine deiminase, type II
TC0900012209.hg.1	6.21	8.33	-4.35	0.001	TTC39B	tetratricopeptide repeat domain 39B
TC0200012727.hg.1	7.6	8.64	-2.05	0.001	PUS10	pseudouridylate synthase 10
TC1700009613.hg.1	10.16	12.41	-4.73	0.001	ASGR2	asialoglycoprotein receptor 2
TC0800007042.hg.1	13.76	12.26	2.83	0.001	ADAMDEC1	ADAM-like, decysin 1
TC0400009936.hg.1	11.06	12.12	-2.08	0.001	GRPEL1	GrpE-like 1, mitochondrial (E. coli)
TC1600011570.hg.1	9.49	10.59	-2.14	0.001	CMC2	C-x(9)-C motif containing 2
TC0600009831.hg.1	4.39	5.53	-2.21	0.001	PPP1R14C	protein phosphatase 1, regulatory (inhibitor) subunit 14C
TC0700011147.hg.1	5.3	6.46	-2.24	0.001	VOPP1	Jeck2013 ALT_ACCEPTOR, ALT_DONOR, coding, INTERNAL, intronic best transcript NM_030796
TC1700008868.hg.1	10.84	9.63	2.32	0.001	TMEM104	transmembrane protein 104
TC1000012475.hg.1	8.6	6.66	3.83	0.001	FFAR4	free fatty acid receptor 4
TC0600014350.hg.1	7.96	9.37	-2.65	0.001	TXLNB	taxilin beta
TC2200008874.hg.1	9.69	8.52	2.25	0.001	NFAM1	NFAT activating protein with ITAM motif 1
TC1500008360.hg.1	10.78	9.74	2.07	0.001	SLCO3A1	solute carrier organic anion transporter family, member 3A1
TC0100010368.hg.1	7.1	8.24	-2.21	0.0011	DUSP12	dual specificity phosphatase 12
TSUnmapped00000085.hg.1	3.61	4.98	-2.58	0.0011	CCDC84	coiled-coil domain containing 84
TC1100008330.hg.1	14.51	13.11	2.65	0.0011	IL18BP	interleukin 18 binding protein
TSUnmapped00000246.hg.1	7.89	9.73	-3.59	0.0011	CCDC84	coiled-coil domain containing 84
TC0300012935.hg.1	8.17	6.93	2.37	0.0011	SHOX2	short stature homeobox 2
TC1500009403.hg.1	10.24	11.93	-3.23	0.0011	TNFAIP8L3	tumor necrosis factor, alpha-induced protein 8-like 3
TC1200009829.hg.1	10.01	7.99	4.06	0.0011	CLEC4E	C-type lectin domain family 4, member E
TC0600009019.hg.1	7	8.12	-2.17	0.0011	SOBP	sine oculis binding protein homolog
TC0700009317.hg.1	11.14	10.06	2.11	0.0011	TRIM24	tripartite motif containing 24
TC1900009754.hg.1	12.77	10.59	4.52	0.0012	DNASE2	deoxyribonuclease II, lysosomal
TC0900008202.hg.1	13.57	12.44	2.18	0.0012	TGFBR1	transforming growth factor, beta receptor 1
TC1500007985.hg.1	7.84	6.76	2.12	0.0012	LOC646938	TBC1 domain family, member 2B pseudogene; Transcript Identified by AceView, Entrez Gene ID(s) 646938
TC0600009534.hg.1	6.2	4.34	3.63	0.0012	MYB	v-myb avian myeloblastosis viral oncogene homolog
TC0100016476.hg.1	6.09	4.66	2.7	0.0012	KIAA0040	KIAA0040
TC1500010463.hg.1	11.44	12.63	-2.29	0.0012	PRC1	protein regulator of cytokinesis 1
TC0600007610.hg.1	4.98	6.87	-3.71	0.0012	MSH5; MSH5-SAPCD1; SAPCD1	mutS homolog 5; MSH5-SAPCD1 readthrough (NMD candidate); suppressor APC domain containing 1
TC1700009123.hg.1	11.22	10.11	2.16	0.0012	RNF213	ring finger protein 213
TC1900009493.hg.1	9.72	5.78	15.37	0.0013	CD209	CD209 molecule
TC0600014162.hg.1	5.39	4.24	2.21	0.0013	TSTD3	thiosulfate sulfurtransferase (rhodanese)-like domain containing 3
TC1200008116.hg.1	12.29	10.74	2.92	0.0013	MDM2	MDM2 proto-oncogene, E3 ubiquitin protein ligase
TC0600011121.hg.1	5.55	6.86	-2.46	0.0013	HIST1H1A	histone cluster 1, H1a
TC0200012009.hg.1	9.63	8.46	2.25	0.0013	DTNB	dystrobrevin beta
TC1300007718.hg.1	8.64	7.14	2.84	0.0013	GPC6	glypican 6
TC0200010502.hg.1	8.06	7.04	2.03	0.0013	FAM117B	family with sequence similarity 117, member B
TC1200012327.hg.1	12.08	10.69	2.63	0.0013	SCARB1	scavenger receptor class B, member 1
TC0700012230.hg.1	7.83	9.2	-2.58	0.0013	NRCAM	neuronal cell adhesion molecule
TC1900010676.hg.1	11.02	9.22	3.47	0.0013	FCGBP	Fc fragment of IgG binding protein
TC0100016427.hg.1	4.9	6.7	-3.49	0.0013	TNFSF18	tumor necrosis factor (ligand) superfamily, member 18
TC1400006529.hg.1	6.07	7.2	-2.18	0.0014	ANG; RNASE4	angiogenin, ribonuclease, RNase A family, 5; ribonuclease, RNase A family, 4
TC1700009500.hg.1	8.6	7.44	2.23	0.0014	ZZEF1	zinc finger, ZZ-type with EF-hand domain 1
TC0100018310.hg.1	15.03	13.79	2.36	0.0014	FCGR2B	Fc fragment of IgG, low affinity IIb, receptor (CD32)
TC1400009980.hg.1	7.93	9.05	-2.17	0.0014	CCDC88C	coiled-coil domain containing 88C
TC1200007769.hg.1	9.61	11.28	-3.18	0.0014	PDE1B	phosphodiesterase 1B, calmodulin-dependent
TC0500012312.hg.1	6.07	7.46	-2.63	0.0015	SPRY4	sprouty RTK signaling antagonist 4
TC0700008004.hg.1	5.55	4.17	2.6	0.0015	GTF2IRD1	GTF2I repeat domain containing 1
TC0700012299.hg.1	7.19	8.34	-2.23	0.0015	GPR85	G protein-coupled receptor 85
TC1400008588.hg.1	7.52	8.86	-2.52	0.0015	TEP1	telomerase-associated protein 1
TC1500010890.hg.1	13.94	12.77	2.25	0.0015	HEXA	hexosaminidase A (alpha polypeptide)
TC0X00007267.hg.1	9.91	8.61	2.47	0.0015	MAGED1	MAGE family member D1
TC0800007978.hg.1	10.38	9.33	2.07	0.0015	LY96	lymphocyte antigen 96
TC1700010701.hg.1	5.03	6.13	-2.13	0.0015	DNAJC7	DnaJ (Hsp40) homolog, subfamily C, member 7
TC1100012535.hg.1	6.82	5.64	2.27	0.0015	PVRL1	poliovirus receptor-related 1 (herpesvirus entry mediator C)
TC0100014849.hg.1	7.07	8.51	-2.71	0.0015	GBP3	guanylate binding protein 3
TC1900011800.hg.1	9.91	8.15	3.4	0.0016	LILRB4	leukocyte immunoglobulin-like receptor, subfamily B (with TM and ITIM domains), member 4
TC1400007495.hg.1	5.47	4.21	2.39	0.0016	PLEKHH1	pleckstrin homology domain containing, family H (with MyTH4 domain) member 1
TC0500011702.hg.1	9.67	10.68	-2.02	0.0016	STARD4	StAR-related lipid transfer domain containing 4
TC1100006494.hg.1	10.68	12.25	-2.96	0.0016	CD151	CD151 molecule (Raph blood group)
TC1800007091.hg.1	7.9	8.97	-2.11	0.0016	ELP2	elongator acetyltransferase complex subunit 2
TC1800007895.hg.1	7.98	9.1	-2.16	0.0016	METTL4	methyltransferase like 4
TC0200015601.hg.1	7.87	6.68	2.28	0.0016	KANSL1L	KAT8 regulatory NSL complex subunit 1 like
TC0100018339.hg.1	9.51	10.67	-2.22	0.0016	MDM4	MDM4, p53 regulator
TC0900009424.hg.1	4.88	6.48	-3.02	0.0016	GLIS3	GLIS family zinc finger 3
TC1100011032.hg.1	14.14	12.63	2.85	0.0017	CYB561A3	cytochrome b561 family, member A3
TC0600014110.hg.1	7.21	8.35	-2.2	0.0017	PSMB9	proteasome subunit beta 9
TC1200011844.hg.1	9.92	8.46	2.75	0.0017	TMEM119	transmembrane protein 119
TC1800008977.hg.1	6.36	7.56	-2.29	0.0017	CD226	CD226 molecule
TC1000007876.hg.1	11.53	12.58	-2.07	0.0017	DDX21	DEAD (Asp-Glu-Ala-Asp) box helicase 21
TC1700011558.hg.1	11.32	9.79	2.88	0.0018	SLC16A6	solute carrier family 16, member 6
TC1000012580.hg.1	9.74	10.97	-2.33	0.0018	ARHGAP19	Rho GTPase activating protein 19
TC0X00008002.hg.1	12.39	11.22	2.26	0.0018	NGFRAP1	nerve growth factor receptor (TNFRSF16) associated protein 1
TC1700006522.hg.1	8.66	7.49	2.26	0.0018	WDR81	WD repeat domain 81
TC0300007051.hg.1	11.08	9.82	2.39	0.0018	ITGA9	integrin alpha 9
TC0200015894.hg.1	6.8	8.21	-2.67	0.0018	DOCK10	Transcript Identified by AceView, Entrez Gene ID(s) 55619
TC0800008801.hg.1	12.12	13.25	-2.2	0.0018	TRIB1	tribbles pseudokinase 1
TC1500009561.hg.1	6.72	7.92	-2.3	0.0018	ALDH1A2	aldehyde dehydrogenase 1 family, member A2
TC0300006465.hg.1	3.29	4.41	-2.19	0.0018	LRRN1	leucine rich repeat neuronal 1
TC0100017445.hg.1	10	8.78	2.32	0.0018	TLR5	toll-like receptor 5
TC0700012917.hg.1	9.57	8.1	2.76	0.0018	TPK1	thiamin pyrophosphokinase 1
TC0200007115.hg.1	8.11	6.66	2.71	0.0018	CLIP4	CAP-GLY domain containing linker protein family, member 4
TC1500009377.hg.1	10.7	12.15	-2.74	0.0019	ATP8B4	ATPase, class I, type 8B, member 4
TC1100009514.hg.1	7.37	5.85	2.87	0.0019	TMEM45B	transmembrane protein 45B
TSUnmapped00000277.hg.1	4.5	5.77	-2.42	0.0019	PSMC4	proteasome 26S subunit, ATPase 4 [Source:HGNC Symbol;Acc:HGNC:9551]
TC0300011423.hg.1	6.93	8.19	-2.4	0.0019	LRIG1	leucine-rich repeats and immunoglobulin-like domains 1
TC1000006768.hg.1	7.72	8.87	-2.23	0.0019	CELF2	Transcript Identified by AceView, Entrez Gene ID(s) 10659
TC0X00011338.hg.1	10.28	9.28	2	0.002	ARSD	arylsulfatase D
TC0X00007999.hg.1	9.47	8.42	2.08	0.002	BEX4	brain expressed X-linked 4
TC1100006598.hg.1	9.87	8.05	3.52	0.002	SLC22A18	solute carrier family 22, member 18
TC0600014220.hg.1	12.91	14	-2.13	0.002	SERPINB9	serpin peptidase inhibitor, clade B (ovalbumin), member 9
TC0500012519.hg.1	15.24	14.09	2.22	0.0021	SPARC	secreted protein, acidic, cysteine-rich (osteonectin)
TC0400007857.hg.1	4.26	5.76	-2.82	0.0021	AREG	amphiregulin
TC1000012423.hg.1	13.77	14.94	-2.25	0.0021	PFKP	phosphofructokinase, platelet
TC0300010038.hg.1	3.62	4.85	-2.34	0.0021	SENP5	Transcript Identified by AceView, Entrez Gene ID(s) 205564
TC0800011855.hg.1	5.39	6.81	-2.67	0.0021	KCNQ3	potassium channel, voltage gated KQT-like subfamily Q, member 3
TC0500012299.hg.1	9.86	11.27	-2.66	0.0021	PCDH12	protocadherin 12
TC1200010899.hg.1	4.94	6.22	-2.42	0.0021	MYL6	Memczak2013 ANTISENSE, coding, INTERNAL, intronic best transcript NM_079423
TC1500009335.hg.1	6.7	5.36	2.53	0.0021	MYEF2	myelin expression factor 2
TC0500012017.hg.1	7.84	6	3.58	0.0021	IRF1	interferon regulatory factor 1
TC1700010762.hg.1	13.37	11.75	3.08	0.0021	VAT1	vesicle amine transport 1
TC1900011449.hg.1	9.54	7.47	4.17	0.0021	TNNT1	troponin T type 1 (skeletal, slow)
TC1700009992.hg.1	5.89	4.85	2.06	0.0021	FAM83G	family with sequence similarity 83, member G
TC0100007194.hg.1	3.53	4.6	-2.09	0.0021	UBXN10	UBX domain protein 10
TC1500009457.hg.1	12.34	11.29	2.07	0.0021	MYO5A	myosin VA
TC0500008229.hg.1	8.08	6.95	2.18	0.0021	PAM	peptidylglycine alpha-amidating monooxygenase
TC2200007273.hg.1	12.93	11.43	2.84	0.0021	CSF2RB	colony stimulating factor 2 receptor, beta, low-affinity (granulocyte-macrophage)
TC1600011358.hg.1	7.58	9.17	-3.01	0.0021	C16orf45	chromosome 16 open reading frame 45
TC1700009043.hg.1	7.48	8.85	-2.57	0.0021	BIRC5	baculoviral IAP repeat containing 5
TC0800008478.hg.1	7.5	6.27	2.35	0.0022	FZD6	frizzled class receptor 6
TC0200011991.hg.1	9.25	7.92	2.51	0.0022	ADCY3	adenylate cyclase 3
TC0100018146.hg.1	5.05	6.41	-2.56	0.0022	ZNF692	zinc finger protein 692
TC0900012179.hg.1	11.47	10.46	2.02	0.0022	SPTAN1	spectrin, alpha, non-erythrocytic 1
TC1600008021.hg.1	7.3	5.39	3.74	0.0022	MMP15	matrix metallopeptidase 15 (membrane-inserted)
TC0300006483.hg.1	11.05	9.9	2.21	0.0022	BHLHE40	basic helix-loop-helix family, member e40
TC1100007017.hg.1	12.09	11.07	2.02	0.0022	TMEM86A	transmembrane protein 86A
TC1400007445.hg.1	5.41	4.3	2.16	0.0022	PLEKHG3	pleckstrin homology domain containing, family G (with RhoGef domain) member 3
TC0700010760.hg.1	12.85	11.8	2.07	0.0022	ELMO1	engulfment and cell motility 1
TC1200007352.hg.1	8.79	7.11	3.21	0.0023	LRRK2	leucine-rich repeat kinase 2
TC0400009221.hg.1	13.34	12.11	2.35	0.0023	MSMO1	methylsterol monooxygenase 1
TC1000008435.hg.1	8.42	9.53	-2.16	0.0023	HECTD2	HECT domain containing E3 ubiquitin protein ligase 2
TC0600013425.hg.1	5.78	7.3	-2.86	0.0023	ADAT2	adenosine deaminase, tRNA-specific 2
TC0100009877.hg.1	10.16	11.23	-2.11	0.0023	HIST2H3A	histone cluster 2, H3a
TC1000012581.hg.1	9.56	10.77	-2.32	0.0023	ARHGAP19-SLIT1	ARHGAP19-SLIT1 readthrough (NMD candidate)
TC0300013108.hg.1	8.57	7.1	2.77	0.0023	TNIK	TRAF2 and NCK interacting kinase
TC0400008086.hg.1	5.33	6.4	-2.11	0.0024	IBSP	integrin-binding sialoprotein
TC0100018417.hg.1	8.08	6.71	2.59	0.0024	ALDH4A1	aldehyde dehydrogenase 4 family, member A1
TC1600009351.hg.1	2.84	4.04	-2.3	0.0024	GRIN2A	Transcript Identified by AceView, Entrez Gene ID(s) 2903
TC0600007657.hg.1	8.71	5.99	6.55	0.0025	HLA-DQA1	major histocompatibility complex, class II, DQ alpha 1
TC1000010727.hg.1	5.57	6.92	-2.55	0.0025	ANK3	ankyrin 3, node of Ranvier (ankyrin G)
TC0400010058.hg.1	11.04	9.86	2.27	0.0025	HS3ST1	heparan sulfate (glucosamine) 3-O-sulfotransferase 1
TC1500007531.hg.1	6.2	7.33	-2.19	0.0025	USP3	Memczak2013 ALT_ACCEPTOR, ALT_DONOR, coding, INTERNAL, intronic best transcript NM_006537
TC1400010390.hg.1	6.93	4.94	3.96	0.0025	AHNAK2	AHNAK nucleoprotein 2
TC0800009523.hg.1	8.84	7.8	2.05	0.0025	MFHAS1	malignant fibrous histiocytoma amplified sequence 1
TC1200007153.hg.1	9.2	10.28	-2.13	0.0026	PPFIBP1	PTPRF interacting protein, binding protein 1 (liprin beta 1)
TC0100007574.hg.1	10.88	9.26	3.07	0.0026	EPB41	erythrocyte membrane protein band 4.1
TC0300007367.hg.1	5.89	4.11	3.44	0.0026	KLHDC8B	kelch domain containing 8B
TC0100016024.hg.1	5.6	6.62	-2.02	0.0026	SH2D2A	SH2 domain containing 2A
TC0700013491.hg.1	11.85	10.45	2.64	0.0026	GIMAP1-GIMAP5; GIMAP5; GIMAP1	GIMAP1-GIMAP5 readthrough; GTPase, IMAP family member 5; GTPase, IMAP family member 1
TC0400008093.hg.1	9.36	10.37	-2.02	0.0026	PKD2	polycystic kidney disease 2 (autosomal dominant)
TC1200007559.hg.1	6.93	8.12	-2.29	0.0026	TROAP	trophinin associated protein
TC1100012126.hg.1	5.2	6.97	-3.39	0.0026	MMP8	matrix metallopeptidase 8
TC0500012842.hg.1	9.8	11.86	-4.15	0.0027	DUSP1	dual specificity phosphatase 1
TC0100014340.hg.1	3.89	5.84	-3.87	0.0027	TACSTD2	tumor-associated calcium signal transducer 2
TC0600010810.hg.1	7.21	8.54	-2.51	0.0027	NEDD9	neural precursor cell expressed, developmentally down-regulated 9
TC0300006437.hg.1	4.73	3.68	2.08	0.0027	CHL1	cell adhesion molecule L1-like
TC0500011280.hg.1	12.14	13.58	-2.72	0.0027	DHFR	dihydrofolate reductase
TC0100018483.hg.1	11.16	12.27	-2.16	0.0027	HIST2H2BE	histone cluster 2, H2be
TC0100010269.hg.1	14.91	13.69	2.33	0.0027	SLAMF8	SLAM family member 8
TC0100015550.hg.1	9.63	11.33	-3.24	0.0027	FAM72C	family with sequence similarity 72, member C
TC0200010419.hg.1	8.32	9.8	-2.79	0.0027	SGOL2	shugoshin-like 2 (S. pombe)
TC0300013933.hg.1	6.53	7.88	-2.54	0.0028	THUMPD3-AS1	THUMPD3 antisense RNA 1
TC2000009980.hg.1	5.88	7.05	-2.25	0.0029	LINC00654	long intergenic non-protein coding RNA 654
TC1200006616.hg.1	11.67	10.47	2.3	0.0029	LTBR	lymphotoxin beta receptor (TNFR superfamily, member 3)
TC1900009242.hg.1	3.32	4.34	-2.03	0.0029	GNG7	Transcript Identified by AceView, Entrez Gene ID(s) 2788
TC0X00007573.hg.1	10.4	11.5	-2.15	0.0029	OGT	O-linked N-acetylglucosamine (GlcNAc) transferase
TC0800006892.hg.1	3.13	4.25	-2.17	0.0029	NAT2	N-acetyltransferase 2 (arylamine N-acetyltransferase)
TC0100009723.hg.1	9.08	10.72	-3.1	0.003	FAM72D	family with sequence similarity 72, member D
TC2200006517.hg.1	6.62	5.07	2.92	0.003	CECR2	cat eye syndrome chromosome region, candidate 2
TC0400008943.hg.1	7.74	10.81	-8.4	0.003	EDNRA	endothelin receptor type A
TC0300013277.hg.1	5.18	3.88	2.47	0.003	PEX5L	Transcript Identified by AceView, Entrez Gene ID(s) 51555
TC1200006786.hg.1	6.84	8.75	-3.76	0.003	TMEM52B	transmembrane protein 52B
TC1300009249.hg.1	6.45	5.37	2.1	0.003	KLF12	Kruppel-like factor 12
TC1500010655.hg.1	11	12.3	-2.46	0.0031	CHSY1	chondroitin sulfate synthase 1
TC1900008669.hg.1	15.21	13.87	2.54	0.0031	FPR3	formyl peptide receptor 3
TC1500007392.hg.1	10.02	11.16	-2.2	0.0031	CCNB2	cyclin B2
TC0900009333.hg.1	9.78	10.88	-2.15	0.0032	FAM157B	family with sequence similarity 157, member B
TC0600010066.hg.1	11.55	10.5	2.08	0.0032	IGF2R	insulin-like growth factor 2 receptor
TC1700006546.hg.1	9.51	10.51	-2.01	0.0033	SRR	serine racemase
TC1200011993.hg.1	13.35	12	2.55	0.0033	SLC8B1	solute carrier family 8 (sodium/lithium/calcium exchanger), member B1
TC0300013687.hg.1	3.63	4.76	-2.19	0.0033	TFRC	Transcript Identified by AceView, Entrez Gene ID(s) 7037
TC0200012977.hg.1	6.22	7.66	-2.71	0.0034	MXD1	Memczak2013 ANTISENSE, coding, INTERNAL, intronic best transcript NM_001202514
TC0700008875.hg.1	4.34	5.49	-2.22	0.0034	MET	MET proto-oncogene, receptor tyrosine kinase
TC0100015509.hg.1	9.78	11.3	-2.86	0.0034	FAM72B	family with sequence similarity 72, member B
TC1900010334.hg.1	6.71	5.6	2.15	0.0034	TSHZ3	teashirt zinc finger homeobox 3
TC0600007377.hg.1	13.24	15.5	-4.78	0.0034	HIST1H2BM	histone cluster 1, H2bm
TC2100007402.hg.1	11.03	12.75	-3.31	0.0034	ADARB1	adenosine deaminase, RNA-specific, B1
TC1700009640.hg.1	8.07	7.02	2.07	0.0034	ZBTB4	zinc finger and BTB domain containing 4
TC0800009865.hg.1	5.77	6.78	-2.02	0.0034	RP11-875O11.1; RHOBTB2	Salzman2013 ANTISENSE, CDS, coding, INTERNAL, intronic, OVCODE, OVERLAPTX, OVEXON, UTR3 best transcript NM_015178; novel transcript, antisense to RHOBTB2
TC0500011804.hg.1	8.4	7.15	2.37	0.0034	DTWD2	DTW domain containing 2
TC0600011507.hg.1	8.68	9.92	-2.37	0.0034	PSMB8	proteasome subunit beta 8
TC0100018439.hg.1	8.96	11.03	-4.2	0.0035	TAL1	T-cell acute lymphocytic leukemia 1
TC1100007841.hg.1	5.15	3.98	2.25	0.0035	SCGB2A2	secretoglobin, family 2A, member 2
TC1000011368.hg.1	6.55	7.88	-2.52	0.0035	ANKRD22	ankyrin repeat domain 22
TC1600009022.hg.1	4.73	3.49	2.36	0.0035	TPSB2; TPSAB1	tryptase beta 2 (gene/pseudogene); tryptase alpha/beta 1
TC0800008080.hg.1	12.74	14.51	-3.42	0.0036	FABP5	fatty acid binding protein 5 (psoriasis-associated)
TC0700011561.hg.1	10.16	11.78	-3.07	0.0036	CCL24	chemokine (C-C motif) ligand 24
TC1700012186.hg.1	11.35	9.94	2.65	0.0036	TNFSF13	tumor necrosis factor (ligand) superfamily, member 13
TSUnmapped00000103.hg.1	11.97	10.9	2.1	0.0036	MLXIP	MLX interacting protein
TC0500011398.hg.1	9.24	10.31	-2.11	0.0036	CCNH	cyclin H
TC0800007370.hg.1	5.17	4.11	2.09	0.0036	ADAM32	ADAM metallopeptidase domain 32
TC0200016424.hg.1	13.11	14.61	-2.83	0.0036	LBH	limb bud and heart development
TC0600009683.hg.1	8.54	9.98	-2.71	0.0036	AIG1	androgen-induced 1
TC0500011725.hg.1	7.12	5.98	2.22	0.0036	MCC	mutated in colorectal cancers
TC1500009429.hg.1	12.49	11.48	2.01	0.0036	DMXL2	Dmx-like 2
TC1100009287.hg.1	8.9	7.2	3.26	0.0037	ARHGEF12	Rho guanine nucleotide exchange factor (GEF) 12
TC0600006976.hg.1	9.1	6.59	5.69	0.0037	PHACTR1	phosphatase and actin regulator 1
TC0200014672.hg.1	4.93	8.42	-11.23	0.0038	NR4A2	nuclear receptor subfamily 4, group A, member 2
TC1900012038.hg.1	8.22	7.03	2.27	0.0039	LILRA6	leukocyte immunoglobulin-like receptor, subfamily A (with TM domain), member 6
TC0200014834.hg.1	8.13	6.88	2.39	0.004	STK39	serine threonine kinase 39
TC0600012875.hg.1	9.99	11.05	-2.08	0.004	FYN	FYN proto-oncogene, Src family tyrosine kinase
TC1000010276.hg.1	6.23	8.12	-3.72	0.004	NRP1	Transcript Identified by AceView, Entrez Gene ID(s) 8829
TC0100014203.hg.1	6.77	5.73	2.06	0.004	ZCCHC11	zinc finger, CCHC domain containing 11
TC0100015698.hg.1	9.57	10.7	-2.18	0.004	HIST2H3D	histone cluster 2, H3d
TC1100007003.hg.1	14.86	16.25	-2.62	0.0041	LDHA	lactate dehydrogenase A
TC1900010391.hg.1	14.16	12.95	2.3	0.0041	PEPD	peptidase D
TSUnmapped00000252.hg.1	4.14	5.39	-2.38	0.0041	TRAPPC4	trafficking protein particle complex 4
TC1100011014.hg.1	9.73	8.72	2.02	0.0041	SLC15A3	solute carrier family 15 (oligopeptide transporter), member 3
TC2200006638.hg.1	4.4	5.47	-2.1	0.0041	DGCR8	Zhang2013 ALT_ACCEPTOR, ALT_DONOR, coding, INTERNAL, intronic best transcript NM_022720
TC1900011799.hg.1	11.6	10.19	2.66	0.0042	LILRB1	leukocyte immunoglobulin-like receptor, subfamily B (with TM and ITIM domains), member 1
TC0900006531.hg.1	6.28	7.32	-2.07	0.0042	RCL1	RNA terminal phosphate cyclase-like 1
TC0600008262.hg.1	7.31	6	2.49	0.0042	TMEM14A	transmembrane protein 14A
TC1800006657.hg.1	6.02	7.25	-2.33	0.0042	VAPA	Memczak2013 ALT_ACCEPTOR, ALT_DONOR, coding, INTERNAL, intronic best transcript NM_003574
TC1100011395.hg.1	10.41	8.89	2.86	0.0043	CPT1A	carnitine palmitoyltransferase 1A (liver)
TC1100008039.hg.1	7.96	9.01	-2.07	0.0043	MUS81	MUS81 structure-specific endonuclease subunit
TC0700013047.hg.1	11.18	8.42	6.77	0.0043	TMEM176B	transmembrane protein 176B
TC0600014348.hg.1	7.8	6.5	2.46	0.0043	NHSL1	NHS-like 1
TC0300011152.hg.1	9.91	11.07	-2.22	0.0044	DUSP7	dual specificity phosphatase 7
TC0500013155.hg.1	10.6	8.62	3.93	0.0044	BASP1	brain abundant, membrane attached signal protein 1
TC1600006941.hg.1	10.12	8.93	2.29	0.0044	SNX29	sorting nexin 29
TC0600011385.hg.1	3.15	4.21	-2.08	0.0044	FLOT1	Transcript Identified by AceView, Entrez Gene ID(s) 10211
TC1500007513.hg.1	11.65	10.63	2.03	0.0044	LACTB	lactamase, beta
TC1100010216.hg.1	7.1	5.44	3.17	0.0045	PLEKHA7	pleckstrin homology domain containing, family A member 7
TC0100006587.hg.1	9.63	8.41	2.33	0.0045	FAM213B	family with sequence similarity 213, member B
TC1800007201.hg.1	6.32	5.3	2.02	0.0045	SIGLEC15	sialic acid binding Ig-like lectin 15
TC1900011762.hg.1	11.68	9.25	5.37	0.0045	APOC2	apolipoprotein C-II
TC1900007012.hg.1	8.95	7.7	2.38	0.0045	LDLR; MIR6886	low density lipoprotein receptor; microRNA 6886
TC0600007262.hg.1	7.89	9.79	-3.75	0.0045	HIST1H3A	histone cluster 1, H3a
TC0700009680.hg.1	10.45	7.64	6.98	0.0046	TMEM176A	transmembrane protein 176A
TC0600013258.hg.1	4.56	5.94	-2.61	0.0046	AHI1	Abelson helper integration site 1
TC1200011838.hg.1	15.55	14.48	2.1	0.0046	CMKLR1	chemerin chemokine-like receptor 1
TC1600009868.hg.1	9.27	8.08	2.28	0.0047	SULT1A2	sulfotransferase family 1A member 2
TC0300014048.hg.1	6.95	8.08	-2.18	0.0047	NPHP3-ACAD11	NPHP3-ACAD11 readthrough (NMD candidate)
TC1400007860.hg.1	7.14	8.27	-2.19	0.0047	FLRT2	fibronectin leucine rich transmembrane protein 2
TC0100012496.hg.1	12.21	10.85	2.56	0.0047	NADK	NAD kinase
TC0600014223.hg.1	7.82	6.61	2.31	0.0047	SLC22A23	solute carrier family 22, member 23
TC0600011125.hg.1	10.32	11.39	-2.1	0.0048	HIST1H2AB	histone cluster 1, H2ab
TC1200008942.hg.1	13.41	12.11	2.46	0.0048	PLBD2	phospholipase B domain containing 2
TC1400006521.hg.1	13.31	14.35	-2.05	0.0048	PNP	purine nucleoside phosphorylase
TC0500010928.hg.1	7.74	8.79	-2.08	0.0048	CENPK	centromere protein K
TSUnmapped00000527.hg.1	4.35	5.78	-2.71	0.0048	LRIG1
TC0100006787.hg.1	10.41	9.25	2.24	0.0049	PIK3CD	phosphatidylinositol-4,5-bisphosphate 3-kinase, catalytic subunit delta
TC1600011292.hg.1	7.88	9.1	-2.32	0.0049	FANCA	Fanconi anemia complementation group A
TC1700006774.hg.1	6.8	7.85	-2.07	0.0049	CYB5D1	cytochrome b5 domain containing 1
TSUnmapped00000392.hg.1	11.93	10.25	3.21	0.0049	FCGBP	Fc fragment of IgG binding protein
TC0600008253.hg.1	8.94	7.56	2.61	0.0049	PAQR8	progestin and adipoQ receptor family member VIII
TC1700006646.hg.1	9.29	8.25	2.06	0.0049	MINK1	misshapen-like kinase 1
TC0500012238.hg.1	8.9	10.97	-4.21	0.005	HBEGF	heparin-binding EGF-like growth factor
TC0100014660.hg.1	10.15	11.15	-2.01	0.005	FUBP1	far upstream element (FUSE) binding protein 1
TC1900008057.hg.1	13.53	15	-2.76	0.0051	ZFP36	ZFP36 ring finger protein
TC0800007004.hg.1	10.61	12.02	-2.66	0.0051	RHOBTB2	Rho-related BTB domain containing 2
TC0600011228.hg.1	6.54	7.95	-2.65	0.0051	HIST1H2AK	histone cluster 1, H2ak
TC0900010866.hg.1	6.67	3.81	7.27	0.0051	FBP1	fructose-1,6-bisphosphatase 1
TC1500010660.hg.1	9.03	7.12	3.74	0.0051	PCSK6	proprotein convertase subtilisin/kexin type 6
TC0500009281.hg.1	8.69	10.03	-2.54	0.0051	PTTG1	pituitary tumor-transforming 1
TC0100008897.hg.1	6.59	5.31	2.43	0.0052	WDR63	WD repeat domain 63
TC2200007331.hg.1	9.15	7.98	2.26	0.0052	PICK1	protein interacting with PRKCA 1
TC1000007950.hg.1	7.5	5.98	2.87	0.0052	UNC5B	unc-5 netrin receptor B
TC1100010987.hg.1	12.11	13.81	-3.23	0.0053	FABP5	fatty acid binding protein 5 (psoriasis-associated)
TC1600010732.hg.1	10.35	9.14	2.31	0.0053	NQO1	NAD(P)H dehydrogenase, quinone 1
TC0200009973.hg.1	8.38	7.11	2.41	0.0054	ITGA6	integrin alpha 6
TC1900011758.hg.1	14.76	12.55	4.62	0.0054	APOE	apolipoprotein E
TC1000012570.hg.1	11.9	10.09	3.51	0.0054	NDST2	N-deacetylase/N-sulfotransferase (heparan glucosaminyl) 2
TC1500007633.hg.1	7.66	9.06	-2.63	0.0054	SMAD3	SMAD family member 3
TC0400008628.hg.1	5.32	6.78	-2.76	0.0054	SPRY1	sprouty RTK signaling antagonist 1
TC1100012123.hg.1	10.48	6.06	21.42	0.0055	MMP7	matrix metallopeptidase 7
TC0100015858.hg.1	12.94	16.3	-10.27	0.0055	S100A8	S100 calcium binding protein A8
TC1600006926.hg.1	7.71	6.36	2.55	0.0055	SNN	stannin
TC1100009453.hg.1	6.31	5.18	2.2	0.0056	ST3GAL4	ST3 beta-galactoside alpha-2,3-sialyltransferase 4
TC1200011845.hg.1	14.51	13.25	2.41	0.0056	SELPLG	selectin P ligand
TC0100015701.hg.1	10.2	11.24	-2.06	0.0056	HIST2H3A; HIST2H3C	histone cluster 2, H3a; histone cluster 2, H3c
TC0500013414.hg.1	9.72	11.09	-2.6	0.0057	THOC3	THO complex 3
TC0100009101.hg.1	3.2	4.44	-2.36	0.0058	ABCD3	Transcript Identified by AceView, Entrez Gene ID(s) 5825
TC0100012318.hg.1	4.48	2.88	3.03	0.0058	GCSAML	germinal center-associated, signaling and motility-like
TC0800009961.hg.1	6.68	4.97	3.27	0.0058	CLU; MIR6843	clusterin; microRNA 6843
TC1700011779.hg.1	12.54	11.33	2.31	0.0058	ACOX1	acyl-CoA oxidase 1, palmitoyl
TC2200007023.hg.1	7.95	6.85	2.14	0.0059	NEFH	neurofilament, heavy polypeptide
TC1600007934.hg.1	3.27	4.43	-2.24	0.0059	CAPNS2	calpain, small subunit 2
TC2000008228.hg.1	10.92	9.81	2.15	0.006	SIGLEC1	sialic acid binding Ig-like lectin 1, sialoadhesin
TC1600009779.hg.1	4.3	5.56	-2.41	0.006	ARHGAP17	Memczak2013 ALT_ACCEPTOR, ALT_DONOR, coding, INTERNAL, intronic best transcript NM_001006634
TC0600007596.hg.1	8.53	9.87	-2.54	0.0061	TNF	tumor necrosis factor
TC0800010426.hg.1	3.82	4.88	-2.08	0.0061	FAM150A	family with sequence similarity 150, member A
TC0200016502.hg.1	6.3	4.13	4.49	0.0061	IL18R1	interleukin 18 receptor 1
TC0500011146.hg.1	9.91	11.01	-2.16	0.0062	ENC1	ectodermal-neural cortex 1 (with BTB domain)
TC0X00010785.hg.1	8.96	10.29	-2.52	0.0062	SMARCA1	SWI/SNF related, matrix associated, actin dependent regulator of chromatin, subfamily a, member 1
TC0200016717.hg.1	10.15	11.54	-2.61	0.0063	TBC1D8	TBC1 domain family, member 8 (with GRAM domain)
TC0600009381.hg.1	7	8.26	-2.39	0.0064	CENPW	centromere protein W
TC1500010723.hg.1	6.13	8.38	-4.76	0.0064	CHAC1	ChaC glutathione-specific gamma-glutamylcyclotransferase 1
TC0300014049.hg.1	5.74	7.03	-2.45	0.0064	ACAD11	acyl-CoA dehydrogenase family, member 11
TC1200006718.hg.1	5.73	4.7	2.04	0.0064	CLEC6A	C-type lectin domain family 6, member A
TC1000009865.hg.1	5.89	7.04	-2.22	0.0066	FAM107B	Memczak2013 ALT_ACCEPTOR, ALT_DONOR, coding, INTERNAL, intronic best transcript NM_031453
TC1900007318.hg.1	8.91	10.13	-2.33	0.0066	BABAM1	Zhang2013 ALT_ACCEPTOR, ALT_DONOR, coding, INTERNAL, intronic best transcript NM_001033549
TC1200010516.hg.1	9.47	7.23	4.73	0.0067	SLC38A1	solute carrier family 38, member 1
TC2000008852.hg.1	11.45	9.72	3.31	0.0067	NOL4L	nucleolar protein 4-like
TC0700011797.hg.1	9.29	8.2	2.13	0.0067	SAMD9L	sterile alpha motif domain containing 9-like
TC0200010467.hg.1	4.89	3.61	2.44	0.0067	CDK15	cyclin-dependent kinase 15
TC1000007176.hg.1	11.07	9.34	3.31	0.0068	MAP3K8	mitogen-activated protein kinase kinase kinase 8
TC1200009676.hg.1	5.66	4.28	2.6	0.0068	AKAP3	A kinase (PRKA) anchor protein 3
TC0200008930.hg.1	11.8	13.26	-2.75	0.0068	SLC20A1	solute carrier family 20 (phosphate transporter), member 1
TC2100007534.hg.1	4.04	5.1	-2.08	0.0069	TEKT4P2	tektin 4 pseudogene 2
TC1700008769.hg.1	9.01	10.53	-2.87	0.0069	KCNJ2	potassium channel, inwardly rectifying subfamily J, member 2
TC1900011763.hg.1	9.52	8.17	2.54	0.0069	APOC4-APOC2; APOC2	APOC4-APOC2 readthrough (NMD candidate); apolipoprotein C-II
TC1500008757.hg.1	6.95	8.23	-2.44	0.0071	ATP10A	ATPase, class V, type 10A
TC1000007990.hg.1	9.1	10.54	-2.71	0.0072	DDIT4	DNA damage inducible transcript 4
TC0X00007537.hg.1	8.58	10.09	-2.84	0.0072	KIF4A	kinesin family member 4A
TC0600009439.hg.1	7.03	8.85	-3.52	0.0074	TMEM200A	transmembrane protein 200A
TC1100008736.hg.1	7.87	9.27	-2.64	0.0074	NAALAD2	N-acetylated alpha-linked acidic dipeptidase 2
TC1700010420.hg.1	12.29	13.34	-2.07	0.0074	SLFN11	schlafen family member 11
TC0200011040.hg.1	13.46	11.56	3.73	0.0074	ITM2C	integral membrane protein 2C
TC0300009310.hg.1	7.47	6.3	2.25	0.0075	MLF1	myeloid leukemia factor 1
TC0500011334.hg.1	5.47	7.46	-3.97	0.0075	TMEM167A	Transcript Identified by AceView, Entrez Gene ID(s) 153339
TC0900010702.hg.1	9.25	8.05	2.29	0.0075	SEMA4D	sema domain, immunoglobulin domain (Ig), transmembrane domain (TM) and short cytoplasmic domain, (semaphorin) 4D
TC0900008839.hg.1	5.86	7.03	-2.25	0.0075	SLC25A25	solute carrier family 25 (mitochondrial carrier; phosphate carrier), member 25
TC0200009539.hg.1	7.94	9.71	-3.43	0.0075	ARHGAP15	Rho GTPase activating protein 15
TC0100014768.hg.1	6.85	4.94	3.77	0.0076	MCOLN2	mucolipin 2
TC0700006813.hg.1	10.04	11.19	-2.23	0.0076	HDAC9	histone deacetylase 9
TC0600013519.hg.1	11.17	9.77	2.64	0.0077	ZC3H12D	zinc finger CCCH-type containing 12D
TC1200009875.hg.1	6.1	7.76	-3.16	0.0077	CLECL1	C-type lectin-like 1
TC2000006864.hg.1	5.94	7.17	-2.34	0.0077	RIN2	Transcript Identified by AceView, Entrez Gene ID(s) 54453
TC0800012026.hg.1	5.71	4.58	2.19	0.0077	SLC45A4	solute carrier family 45, member 4
TC0600012542.hg.1	13.12	14.21	-2.13	0.0077	UBE2J1	ubiquitin-conjugating enzyme E2, J1
TC0700011586.hg.1	8.52	7.29	2.35	0.0078	GSAP	gamma-secretase activating protein
TC1600008119.hg.1	9.58	8.36	2.34	0.0079	CDH5	cadherin 5, type 2 (vascular endothelium)
TC1700010731.hg.1	6.55	7.57	-2.04	0.008	PSMC3IP	PSMC3 interacting protein
TC2100007491.hg.1	10.3	7.84	5.5	0.0081	CBS	cystathionine-beta-synthase
TC1200012610.hg.1	6.89	5.59	2.46	0.0082	SSPN	sarcospan
TC2000006813.hg.1	8.05	9.6	-2.94	0.0083	MGME1	mitochondrial genome maintenance exonuclease 1
TC1700012380.hg.1	5.92	7.18	-2.4	0.0083	SPAG5	sperm associated antigen 5
TC1400007201.hg.1	9.67	10.71	-2.06	0.0084	CDKN3	cyclin-dependent kinase inhibitor 3
TC0200010012.hg.1	3.74	4.85	-2.15	0.0084	AC010894.3; SCRN3	novel transcript; Transcript Identified by AceView, Entrez Gene ID(s) 79634
TC2000007089.hg.1	10.8	12.03	-2.34	0.0084	TPX2	TPX2, microtubule-associated
TC0200013511.hg.1	7.73	8.95	-2.33	0.0084	DUSP2	dual specificity phosphatase 2
TC0800007957.hg.1	9.3	7.91	2.63	0.0085	RDH10	retinol dehydrogenase 10 (all-trans)
TC1900012036.hg.1	10.25	8.91	2.54	0.0085	LILRB3	leukocyte immunoglobulin-like receptor, subfamily B (with TM and ITIM domains), member 3
TC1000008056.hg.1	12.17	10.76	2.66	0.0085	VCL	vinculin
TC0600014198.hg.1	10.44	9.32	2.17	0.0085	TULP4	tubby like protein 4
TC0400010256.hg.1	6.01	4.84	2.24	0.0085	CCDC149	coiled-coil domain containing 149
TC0600007384.hg.1	5.79	7.18	-2.63	0.0086	HIST1H2BO	histone cluster 1, H2bo
TC0X00009929.hg.1	8.05	6.92	2.2	0.0087	OPHN1	oligophrenin 1
TC1400008382.hg.1	11.97	9.86	4.3	0.0087	TNFAIP2	tumor necrosis factor, alpha-induced protein 2
TC1200009157.hg.1	10.08	8.75	2.52	0.0088	P2RX7	purinergic receptor P2X, ligand gated ion channel, 7
TC0300011597.hg.1	6.81	7.96	-2.21	0.0088	ZNF717	zinc finger protein 717
TC0500012388.hg.1	6.34	8.64	-4.92	0.0088	DPYSL3	dihydropyrimidinase-like 3
TC1200011054.hg.1	6.28	5.16	2.17	0.0089	PPM1H	protein phosphatase, Mg2+/Mn2+ dependent, 1H
TC1500007355.hg.1	9.67	11.53	-3.64	0.0089	AQP9	aquaporin 9
TC0800010193.hg.1	12.81	13.85	-2.06	0.0089	TM2D2	TM2 domain containing 2
TC0100017094.hg.1	9.97	11.43	-2.75	0.009	FAM72A	family with sequence similarity 72, member A
TC0500008014.hg.1	11.15	12.33	-2.26	0.009	RASA1	RAS p21 protein activator (GTPase activating protein) 1
TC0500010615.hg.1	14.91	13.74	2.24	0.009	SEPP1	selenoprotein P, plasma, 1
TC1100009657.hg.1	14.61	15.83	-2.32	0.009	IFITM3	interferon induced transmembrane protein 3
TC0400012917.hg.1	7.13	8.15	-2.03	0.0092	ARAP2	ArfGAP with RhoGAP domain, ankyrin repeat and PH domain 2
TC1600009829.hg.1	9.52	10.59	-2.1	0.0092	NSMCE1	NSE1 homolog, SMC5-SMC6 complex component
TC0100009870.hg.1	10.6	12.12	-2.88	0.0093	HIST2H4B; HIST2H4A	histone cluster 2, H4b; histone cluster 2, H4a
TC0200010729.hg.1	7.11	8.22	-2.15	0.0093	XRCC5	Transcript Identified by AceView, Entrez Gene ID(s) 7520
TC2100008285.hg.1	10.24	7.82	5.35	0.0093	CBS	cystathionine-beta-synthase
TC2200007574.hg.1	11.75	10.28	2.77	0.0094	PARVB	parvin, beta
TC0100009056.hg.1	6.97	7.98	-2.02	0.0095	CCDC18	coiled-coil domain containing 18
TC0600011142.hg.1	10.31	11.49	-2.26	0.0096	HIST1H3G	histone cluster 1, H3g
TC1700011744.hg.1	9.6	8.57	2.05	0.0096	MIF4GD	MIF4G domain containing
TC0100018446.hg.1	8.04	6.71	2.51	0.0097	OMA1	OMA1 zinc metallopeptidase
TC2000008516.hg.1	5.4	6.93	-2.89	0.0097	SNX5	Zhang2013 ALT_ACCEPTOR, ALT_DONOR, coding, INTERNAL, intronic best transcript NM_152227
TC1200011567.hg.1	6.46	4.24	4.65	0.0098	TMCC3; MIR7844	transmembrane and coiled-coil domain family 3; microRNA 7844
TC0600007274.hg.1	9.92	10.93	-2.02	0.0099	HIST1H2BD	histone cluster 1, H2bd
TC0300013878.hg.1	12.31	11.09	2.33	0.0101	NCK1	NCK adaptor protein 1
TC1900007988.hg.1	8.85	7.54	2.48	0.0101	SIPA1L3	signal-induced proliferation-associated 1 like 3
TC1500009082.hg.1	11.33	9.89	2.71	0.0101	BMF	Bcl2 modifying factor
TC2200009281.hg.1	5.45	4.21	2.36	0.0101	PNPLA3	patatin-like phospholipase domain containing 3
TC0100016891.hg.1	7.96	9.56	-3.05	0.0101	KIF14	kinesin family member 14
TC0200016767.hg.1	7.38	6.06	2.49	0.0102	MREG	melanoregulin
TC1900006856.hg.1	7.38	6.29	2.14	0.0102	CLEC4M	C-type lectin domain family 4, member M
TC2100006982.hg.1	4.87	5.99	-2.18	0.0104	LINC00649	long intergenic non-protein coding RNA 649
TC1200007844.hg.1	9.05	7.85	2.3	0.0105	RBMS2	RNA binding motif, single stranded interacting protein 2
TC1500007967.hg.1	7.29	8.3	-2.01	0.0106	DNAJA4	DnaJ (Hsp40) homolog, subfamily A, member 4
TC0600008120.hg.1	10.22	11.69	-2.77	0.0106	TMEM63B	transmembrane protein 63B
TC0300011247.hg.1	8.63	11.46	-7.12	0.0106	WNT5A	wingless-type MMTV integration site family, member 5A
TC0500011752.hg.1	5.02	6.18	-2.23	0.0107	FEM1C	Jeck2013 ALT_ACCEPTOR, ALT_DONOR, coding, INTERNAL, intronic best transcript NM_020177
TC1200007461.hg.1	9.49	8.46	2.05	0.0108	PCED1B	PC-esterase domain containing 1B
TC0200010577.hg.1	3.92	5.42	-2.83	0.0108	ADAM23	ADAM metallopeptidase domain 23
TC2100008527.hg.1	6.9	5.54	2.57	0.0109	SLC37A1	solute carrier family 37 (glucose-6-phosphate transporter), member 1
TC0300013103.hg.1	9.74	11	-2.39	0.011	RPL22L1	ribosomal protein L22-like 1
TC0700006735.hg.1	6.38	4.41	3.92	0.0111	SCIN	scinderin
TC0300012718.hg.1	9.08	10.16	-2.12	0.0111	PLOD2	procollagen-lysine, 2-oxoglutarate 5-dioxygenase 2
TC0600008981.hg.1	11.72	10.45	2.4	0.0112	AIM1	absent in melanoma 1
TC0800006884.hg.1	5.65	6.81	-2.23	0.0112	PCM1	Transcript Identified by AceView, Entrez Gene ID(s) 5108
TC0900010789.hg.1	8.68	10.38	-3.26	0.0113	IARS	isoleucyl-tRNA synthetase
TC0600011903.hg.1	8.58	9.73	-2.22	0.0113	MRPL14	mitochondrial ribosomal protein L14
TC0X00008394.hg.1	6.04	4.88	2.23	0.0113	BCORL1	BCL6 corepressor-like 1
TC0100009176.hg.1	6.95	7.98	-2.04	0.0113	SNX7	sorting nexin 7
TC0X00008073.hg.1	12.11	13.31	-2.3	0.0115	PRPS1	phosphoribosyl pyrophosphate synthetase 1
TC1400009738.hg.1	3.97	5.39	-2.68	0.0115	TGFB3	transforming growth factor beta 3
TC0400011014.hg.1	12.9	14.32	-2.66	0.0115	CXCL5	chemokine (C-X-C motif) ligand 5
TC1700006751.hg.1	12.32	11.32	2.01	0.0115	POLR2A	polymerase (RNA) II (DNA directed) polypeptide A, 220kDa
TC1500010369.hg.1	10.89	9.22	3.17	0.0115	MFGE8	milk fat globule-EGF factor 8 protein
TC0400010558.hg.1	4.93	3.37	2.94	0.0116	ATP8A1	ATPase, aminophospholipid transporter (APLT), class I, type 8A, member 1
TC0500006472.hg.1	8.73	9.81	-2.11	0.0117	TRIP13	thyroid hormone receptor interactor 13
TC0400012222.hg.1	7.61	6.45	2.24	0.0117	PDGFC	platelet derived growth factor C
TC0500013193.hg.1	5.43	4.33	2.14	0.0117	CRHBP	corticotropin releasing hormone binding protein
TC1200009903.hg.1	8.33	7.29	2.05	0.0117	KLRC4-KLRK1; KLRK1; KLRC4	KLRC4-KLRK1 readthrough; killer cell lectin-like receptor subfamily K, member 1; killer cell lectin-like receptor subfamily C, member 4
TC0200013332.hg.1	5.78	7.13	-2.55	0.0118	PLGLB1	Transcript Identified by AceView, Entrez Gene ID(s) 285074; 5343
TC0400007023.hg.1	6.6	7.62	-2.02	0.0118	PACRGL	PARK2 co-regulated like
TC0500009108.hg.1	11.76	12.77	-2.02	0.0118	GPX3	glutathione peroxidase 3
TC0400008556.hg.1	6.12	8.18	-4.16	0.0122	MYOZ2	myozenin 2
TC1900011099.hg.1	7.59	4.78	7.02	0.0122	HSD17B14	hydroxysteroid (17-beta) dehydrogenase 14
TC0400011721.hg.1	6.89	8.06	-2.26	0.0123	MAD2L1	MAD2 mitotic arrest deficient-like 1 (yeast)
TC0400011477.hg.1	9.74	10.81	-2.11	0.0124	CENPE	centromere protein E
TC1900010502.hg.1	9.12	11.63	-5.71	0.0126	NFKBID	nuclear factor of kappa light polypeptide gene enhancer in B-cells inhibitor, delta
TC1100011514.hg.1	11.8	10.55	2.37	0.0127	DHCR7	7-dehydrocholesterol reductase
TC1000012573.hg.1	8.21	9.52	-2.49	0.0128	MMRN2	multimerin 2
TC1700011423.hg.1	7.43	8.59	-2.23	0.013	FTSJ3	FtsJ homolog 3 (E. coli)
TC0600007270.hg.1	10.06	11.13	-2.1	0.013	HIST1H2AC	histone cluster 1, H2ac
TC0700009977.hg.1	8.21	10.74	-5.78	0.0134	PDGFA	platelet-derived growth factor alpha polypeptide
TC1200011313.hg.1	6.42	7.74	-2.51	0.0135	NAP1L1	Memczak2013 ALT_ACCEPTOR, ALT_DONOR, coding, INTERNAL, intronic best transcript NM_139207
TC0X00006590.hg.1	6.81	5.48	2.51	0.0136	WWC3	WWC family member 3
TC1900007859.hg.1	9	10.52	-2.87	0.0136	FFAR2	free fatty acid receptor 2
TC0600012833.hg.1	5.03	3.72	2.48	0.0137	SLC22A16	solute carrier family 22 (organic cation/carnitine transporter), member 16
TC0300010413.hg.1	10.01	11.08	-2.11	0.0137	ANKRD28	ankyrin repeat domain 28
TC0300009122.hg.1	9.71	5.4	19.81	0.0138	CPA3	carboxypeptidase A3 (mast cell)
TC0500013271.hg.1	10.46	11.46	-2	0.014	LOC728554; THOC3	THO complex 3 pseudogene; Homo sapiens THO complex 3, mRNA (cDNA clone MGC:5469 IMAGE:3451612), complete cds.; Homo sapiens THO complex 3, mRNA (cDNA clone MGC:87233 IMAGE:5262880), complete cds.; Salzman2013 ANNOTATED, INTERNAL, ncRNA, OVERLAPTX, OVEXON best transcript NR_003615; Transcript Identified by AceView, Entrez Gene ID(s) 728554
TC1200010946.hg.1	11.64	12.68	-2.06	0.0142	NEMP1	nuclear envelope integral membrane protein 1
TC0400011192.hg.1	7.46	6.39	2.1	0.0142	PLAC8	placenta specific 8
TC0900008869.hg.1	10.72	11.86	-2.2	0.0143	ODF2	outer dense fiber of sperm tails 2
TC0500007925.hg.1	5.72	4.6	2.19	0.0145	RASGRF2	Ras protein-specific guanine nucleotide-releasing factor 2
TC1200007594.hg.1	7.09	5.28	3.5	0.0146	ASIC1	acid sensing ion channel 1
TC0100015707.hg.1	10.77	12.23	-2.76	0.0147	HIST2H4A; HIST2H4B	histone cluster 2, H4a; histone cluster 2, H4b
TC1400006652.hg.1	8.93	7.84	2.13	0.0148	ABHD4	abhydrolase domain containing 4
TC0600010707.hg.1	6.55	5.28	2.4	0.0149	NRN1	neuritin 1
TC1200012016.hg.1	6.78	8.07	-2.45	0.015	TBX3	T-box 3
TC0100009364.hg.1	13.34	11.16	4.52	0.015	CSF1	colony stimulating factor 1 (macrophage)
TC0400011978.hg.1	10.31	9.28	2.04	0.0152	TBC1D9	TBC1 domain family, member 9 (with GRAM domain)
TC1200009759.hg.1	7.15	8.23	-2.12	0.0152	CDCA3	cell division cycle associated 3
TC2200007891.hg.1	6.45	7.48	-2.04	0.0153	CECR6	cat eye syndrome chromosome region, candidate 6
TC0200016511.hg.1	13.45	15.44	-3.97	0.0153	IL1RN	interleukin 1 receptor antagonist
TC1500009606.hg.1	4.94	6.1	-2.24	0.0154	MYO1E	Transcript Identified by AceView, Entrez Gene ID(s) 4643
TC0200010733.hg.1	5.29	6.4	-2.16	0.0154	XRCC5	Memczak2013 ALT_ACCEPTOR, ALT_DONOR, coding, INTERNAL, intronic best transcript NM_021141
TC0100016831.hg.1	9.17	10.26	-2.14	0.0155	ASPM	abnormal spindle microtubule assembly
TC0500010599.hg.1	7.38	8.81	-2.68	0.0157	OXCT1	3-oxoacid CoA-transferase 1
TC0500011597.hg.1	3.36	4.39	-2.05	0.0157	SLCO6A1	solute carrier organic anion transporter family, member 6A1
TC0400007460.hg.1	5.25	6.51	-2.39	0.0158	OCIAD1	Transcript Identified by AceView, Entrez Gene ID(s) 54940
TSUnmapped00000486.hg.1	10.25	9.21	2.05	0.0158	MLXIP	MLX interacting protein
TC0100010755.hg.1	7.36	6.19	2.24	0.0158	RALGPS2	Ral GEF with PH domain and SH3 binding motif 2
TC0100007451.hg.1	10.52	7.03	11.21	0.0159	CD52	CD52 molecule
TC1600011440.hg.1	8.83	7.03	3.48	0.0159	OSGIN1	oxidative stress induced growth inhibitor 1
TC0200010328.hg.1	9.97	8.77	2.3	0.016	SLC39A10	solute carrier family 39 (zinc transporter), member 10
TC0100008101.hg.1	9.74	10.75	-2.01	0.016	KIF2C	kinesin family member 2C
TC0500007494.hg.1	4.64	3.62	2.03	0.016	RAB3C	RAB3C, member RAS oncogene family
TC1500010755.hg.1	7.11	6.04	2.11	0.0162	ANKDD1A	ankyrin repeat and death domain containing 1A
TC2000009317.hg.1	7.19	5.59	3.03	0.0164	SULF2	sulfatase 2
TC0100010230.hg.1	11.63	12.88	-2.37	0.0165	CD1C	CD1c molecule
TC0100013581.hg.1	7.61	8.65	-2.05	0.0166	SPOCD1	SPOC domain containing 1
TC1700008668.hg.1	4.85	6.03	-2.27	0.0167	PRKCA	Jeck2013 ALT_ACCEPTOR, ALT_DONOR, coding, INTERNAL, intronic best transcript NM_002737
TC1000008474.hg.1	8.71	9.75	-2.05	0.0167	HHEX	hematopoietically expressed homeobox
TC0100010032.hg.1	14.55	15.66	-2.15	0.0168	S100A9	S100 calcium binding protein A9
TC0600012708.hg.1	9.97	11.06	-2.13	0.017	BVES	blood vessel epicardial substance
TC0600011233.hg.1	13.54	14.56	-2.02	0.0171	HIST1H3I	histone cluster 1, H3i
TC1300009332.hg.1	4.44	5.51	-2.09	0.0172	RBM26	Transcript Identified by AceView, Entrez Gene ID(s) 64062
TC0100016018.hg.1	5.91	4.52	2.63	0.0172	CRABP2	cellular retinoic acid binding protein 2
TC0100018565.hg.1	4.49	3.42	2.1	0.0173	AGT	angiotensinogen (serpin peptidase inhibitor, clade A, member 8)
TC0600007991.hg.1	5.17	4.07	2.14	0.0173	TREML4	triggering receptor expressed on myeloid cells-like 4
TC0800010880.hg.1	5.91	4.46	2.73	0.0173	IL7	interleukin 7
TC0600014109.hg.1	5.33	6.38	-2.07	0.0175	PSMB8-AS1	PSMB8 antisense RNA 1 (head to head)
TC1000007748.hg.1	11.43	12.53	-2.13	0.0175	CDK1	cyclin-dependent kinase 1
TC0600010825.hg.1	10.87	8.86	4.05	0.0176	ADTRP	androgen-dependent TFPI-regulating protein
TC0900010769.hg.1	9.89	11.01	-2.18	0.0177	NFIL3	nuclear factor, interleukin 3 regulated
TC0600008630.hg.1	10.71	11.91	-2.3	0.0177	TTK	TTK protein kinase
TC0100009048.hg.1	6.51	7.62	-2.16	0.0177	RPL5	Memczak2013 ALT_ACCEPTOR, ALT_DONOR, coding, INTERNAL, intronic best transcript NM_000969
TC0200007458.hg.1	13.31	12.05	2.39	0.0177	EPAS1	endothelial PAS domain protein 1
TC2000009198.hg.1	12.12	10.75	2.58	0.0177	ADA	adenosine deaminase
TC0500009038.hg.1	3.78	2.72	2.09	0.018	SPINK9	serine peptidase inhibitor, Kazal type 9
TC0100012167.hg.1	11.74	9.72	4.06	0.0182	KMO	kynurenine 3-monooxygenase (kynurenine 3-hydroxylase)
TC1100012197.hg.1	5.66	4.3	2.56	0.0183	GUCY1A2	guanylate cyclase 1, soluble, alpha 2
TC0300011988.hg.1	4.7	3.39	2.47	0.0186	GCSAM	germinal center-associated, signaling and motility
TC0900011193.hg.1	4.41	5.68	-2.42	0.0195	LPAR1	Jeck2013 ALT_ACCEPTOR, ALT_DONOR, coding, INTERNAL, intronic best transcript NM_057159; Salzman2013 ALT_ACCEPTOR, ALT_DONOR, coding, INTERNAL, intronic best transcript NM_057159
TC0400012950.hg.1	4.97	3.94	2.03	0.0196	RP11-499E18.1; SLC39A8	novel transcript; Transcript Identified by AceView, Entrez Gene ID(s) 64116
TC0100007841.hg.1	9.16	10.22	-2.08	0.0197	CDCA8	cell division cycle associated 8
TC2000006464.hg.1	10.04	8.56	2.78	0.0199	FAM110A	family with sequence similarity 110, member A
TC0700007993.hg.1	5.03	3.53	2.84	0.02	CLDN4	claudin 4
TC0500010453.hg.1	4.63	5.76	-2.19	0.0201	ADAMTS12	ADAM metallopeptidase with thrombospondin type 1 motif 12
TC1900009966.hg.1	5.15	6.53	-2.61	0.0201	PLVAP	plasmalemma vesicle associated protein
TC0800006927.hg.1	11.58	14.32	-6.69	0.0203	LPL	lipoprotein lipase
TC1200008057.hg.1	12.27	11.2	2.1	0.0206	IRAK3; MIR6502	interleukin 1 receptor associated kinase 3; microRNA 6502
TC1400007227.hg.1	14.01	12.83	2.26	0.0206	LGALS3	lectin, galactoside-binding, soluble, 3
TC0100015060.hg.1	7.23	5.59	3.13	0.0208	LRRC39	leucine rich repeat containing 39
TC0900011597.hg.1	7.23	8.52	-2.44	0.0211	SH2D3C	SH2 domain containing 3C
TC0500013363.hg.1	9.2	7.47	3.32	0.0212	DCANP1	dendritic cell-associated nuclear protein
TC0200014772.hg.1	10.57	9.44	2.19	0.0212	IFIH1	interferon induced, with helicase C domain 1
TC1100011294.hg.1	4.47	5.52	-2.08	0.0214	CTSF	cathepsin F
TC1200010182.hg.1	13.94	12.42	2.86	0.0217	BHLHE41	basic helix-loop-helix family, member e41
TC2000008217.hg.1	6.21	5.08	2.19	0.0221	SLC4A11	solute carrier family 4, sodium borate transporter, member 11
TC1200009967.hg.1	8.83	7.73	2.15	0.0221	DUSP16	dual specificity phosphatase 16
TC1200009587.hg.1	11.9	10.85	2.07	0.0222	CACNA2D4	calcium channel, voltage-dependent, alpha 2/delta subunit 4
TC0400006994.hg.1	11.34	12.69	-2.56	0.0224	NCAPG	non-SMC condensin I complex subunit G
TC1200006520.hg.1	7.62	6.11	2.84	0.0226	TSPAN9	tetraspanin 9
TC0100011871.hg.1	5.21	6.27	-2.09	0.0227	HIST3H2BB	histone cluster 3, H2bb
TC0600011235.hg.1	11.27	12.29	-2.02	0.0228	HIST1H2AM; HIST1H3J	histone cluster 1, H2am; histone cluster 1, H3j
TC0100015856.hg.1	8.93	12.58	-12.55	0.0229	S100A12	S100 calcium binding protein A12
TC1500007699.hg.1	9.97	11.14	-2.24	0.0231	KIF23	kinesin family member 23
TC0900012153.hg.1	10.21	9.06	2.22	0.0234	MSANTD3	Myb/SANT-like DNA-binding domain containing 3
TC0900011864.hg.1	7.75	6.34	2.65	0.0236	VAV2	vav 2 guanine nucleotide exchange factor
TC1900010009.hg.1	9.35	10.45	-2.15	0.0237	JUND	jun D proto-oncogene
TC0300006622.hg.1	7.18	9.22	-4.11	0.0239	PPARG	peroxisome proliferator-activated receptor gamma
TC2200007398.hg.1	7.93	6.49	2.7	0.024	SYNGR1	synaptogyrin 1
TC1700012212.hg.1	6.88	5.49	2.62	0.024	CCDC144NL-AS1	CCDC144NL antisense RNA 1
TC0200016115.hg.1	10.57	12.05	-2.79	0.0242	ARL4C	ADP-ribosylation factor like GTPase 4C
TC2000007341.hg.1	9.03	10.27	-2.36	0.0242	FAM83D	family with sequence similarity 83, member D
TC0500013364.hg.1	13.35	11.36	3.95	0.0243	TIFAB	TRAF-interacting protein with forkhead-associated domain, family member B
TC0900010773.hg.1	5.96	4.76	2.29	0.0244	ROR2	receptor tyrosine kinase-like orphan receptor 2
TC0300009301.hg.1	6.9	5.87	2.05	0.025	PTX3	pentraxin 3, long
TC0200015194.hg.1	10.36	8.63	3.31	0.0252	TFPI	tissue factor pathway inhibitor (lipoprotein-associated coagulation inhibitor)
TC0600014300.hg.1	14.27	13.15	2.17	0.0253	GCLC	glutamate-cysteine ligase, catalytic subunit
TC1400009829.hg.1	9.01	10.18	-2.26	0.0255	CEP128	centrosomal protein 128kDa
TC0600014031.hg.1	8.07	6.38	3.23	0.0262	DLL1	delta-like 1 (Drosophila)
TC0600012952.hg.1	6.18	4.74	2.72	0.0265	FRK	fyn-related Src family tyrosine kinase
TC0Y00006651.hg.1	8.64	6.4	4.74	0.0267	NLGN4Y	neuroligin 4, Y-linked
TC0900011072.hg.1	13.26	12.16	2.14	0.0267	ABCA1	ATP binding cassette subfamily A member 1
TC1800009222.hg.1	9.97	8.94	2.05	0.0268	RNF125	ring finger protein 125, E3 ubiquitin protein ligase
TSUnmapped00000289.hg.1	4.68	5.73	-2.07	0.0269	RPL7A	ribosomal protein L7a
TC0200015793.hg.1	5.56	4.53	2.04	0.0269	OBSL1	obscurin-like 1
TC1100007763.hg.1	6.19	4.34	3.59	0.027	MS4A3	membrane-spanning 4-domains, subfamily A, member 3 (hematopoietic cell-specific)
TC2100006854.hg.1	5.3	6.39	-2.13	0.0271	MAP3K7CL	MAP3K7 C-terminal like
TC1400007320.hg.1	4.33	5.65	-2.51	0.0272	DACT1	dishevelled-binding antagonist of beta-catenin 1
TC0900006539.hg.1	6.66	7.87	-2.32	0.0274	JAK2	Memczak2013 ALT_ACCEPTOR, ALT_DONOR, coding, INTERNAL, intronic best transcript NM_004972
TC0100016135.hg.1	8.67	7.06	3.07	0.0276	SLAMF6	SLAM family member 6
TC0200009393.hg.1	5.71	6.79	-2.12	0.0279	LOC101928161; AC010890.1; NCKAP5; spawfa	uncharacterized LOC101928161; Salzman2013 ANTISENSE, coding, INTERNAL, intronic, OVERLAPTX best transcript NM_207363; novel transcript, antisense to NCKAP5; Transcript Identified by AceView
TC0100009560.hg.1	11.58	10.52	2.08	0.0286	CD101	CD101 molecule
TC1100010992.hg.1	8.2	7.14	2.08	0.0297	TCN1	transcobalamin I (vitamin B12 binding protein, R binder family)
TC0700009082.hg.1	5.88	4.78	2.14	0.0301	SMO	smoothened, frizzled class receptor
TC0100008260.hg.1	9.7	10.89	-2.27	0.0303	CDKN2C	cyclin-dependent kinase inhibitor 2C (p18, inhibits CDK4)
TC0200008666.hg.1	7.04	5.56	2.79	0.0304	IL1R1	interleukin 1 receptor, type I
TC2000007519.hg.1	11.57	10.29	2.42	0.0306	CD40	CD40 molecule, TNF receptor superfamily member 5
TSUnmapped00000627.hg.1	9.23	10.48	-2.38	0.0307	KIF15	kinesin family member 15
TC1600011375.hg.1	9.91	8.53	2.59	0.0308	QPRT	quinolinate phosphoribosyltransferase
TC1800008580.hg.1	11.86	10.31	2.92	0.0309	PSTPIP2	proline-serine-threonine phosphatase interacting protein 2
TC0100011001.hg.1	10.4	9.2	2.3	0.0311	RGS18	regulator of G-protein signaling 18
TC1200007861.hg.1	14.12	13.12	2	0.0314	LRP1	LDL receptor related protein 1
TC1100007301.hg.1	5.98	7.31	-2.52	0.0315	PRR5L	proline rich 5 like
TC0100010140.hg.1	10.76	11.77	-2.02	0.0316	SYT11	synaptotagmin XI
TC1300008705.hg.1	5.79	7.02	-2.34	0.0318	ELF1	Transcript Identified by AceView, Entrez Gene ID(s) 1997; 100128628
TC1000010575.hg.1	7.22	6.19	2.05	0.0318	ARHGAP22	Rho GTPase activating protein 22
TC0100014772.hg.1	6.21	5.13	2.11	0.0322	SYDE2	synapse defective 1, Rho GTPase, homolog 2 (C. elegans)
TC0100014743.hg.1	4.66	3.33	2.51	0.0323	TTLL7	tubulin tyrosine ligase-like family member 7
TC0500008125.hg.1	7.95	8.95	-2.01	0.0325	RHOBTB3	Rho-related BTB domain containing 3
TC0100008882.hg.1	5.48	4.12	2.57	0.0328	DNASE2B	deoxyribonuclease II beta
TC0100007638.hg.1	7.22	5.46	3.39	0.0329	SERINC2	serine incorporator 2
TC0300008467.hg.1	14.26	13.1	2.23	0.0329	ARHGAP31	Rho GTPase activating protein 31
TC1400009248.hg.1	10.39	11.69	-2.46	0.0331	DLGAP5	discs, large (Drosophila) homolog-associated protein 5
TC1600009952.hg.1	11.89	10.73	2.23	0.0335	YPEL3	yippee like 3
TC1200006570.hg.1	3.91	4.94	-2.04	0.0335	KCNA1	potassium channel, voltage gated shaker related subfamily A, member 1
TC1400010629.hg.1	12.39	11.34	2.08	0.0337	FLVCR2	feline leukemia virus subgroup C cellular receptor family, member 2
TC0300013751.hg.1	5.82	4.35	2.78	0.0337	BDH1	3-hydroxybutyrate dehydrogenase, type 1
TC0100012734.hg.1	13.41	11.58	3.55	0.0337	TNFRSF9	tumor necrosis factor receptor superfamily, member 9
TC1800007360.hg.1	5.55	4.4	2.22	0.0338	RAB27B	RAB27B, member RAS oncogene family
TC1900011677.hg.1	8.38	6.81	2.97	0.034	IL27RA	interleukin 27 receptor, alpha
TC1300006817.hg.1	4.97	6.42	-2.73	0.034	KL	klotho
TC1200012815.hg.1	6.9	8.06	-2.24	0.0342	METTL1	methyltransferase like 1
TC0300006691.hg.1	8.35	7.34	2.01	0.0342	FGD5	FYVE, RhoGEF and PH domain containing 5
TC1400010617.hg.1	9.95	11.28	-2.51	0.0347	PRKCH	protein kinase C, eta
TC1800008891.hg.1	9.33	8.31	2.02	0.0348	BCL2	B-cell CLL/lymphoma 2
TC0500009046.hg.1	7.54	8.89	-2.55	0.0349	ADRB2	adrenoceptor beta 2, surface
TC1900009310.hg.1	9.62	10.94	-2.51	0.035	MATK	megakaryocyte-associated tyrosine kinase
TC2000007239.hg.1	6.74	5.63	2.15	0.0356	EPB41L1	erythrocyte membrane protein band 4.1-like 1
TC1900011977.hg.1	4.35	5.39	-2.06	0.0357	ZNF229	zinc finger protein 229
TC0500007665.hg.1	10.24	11.44	-2.31	0.0357	CCNB1	cyclin B1
TC0100009837.hg.1	11.34	10.08	2.4	0.0358	PDE4DIP	phosphodiesterase 4D interacting protein
TC1000007272.hg.1	12.79	13.95	-2.24	0.036	CREM	cAMP responsive element modulator
TC1000008406.hg.1	9.69	10.83	-2.19	0.0368	KIF20B	kinesin family member 20B
TC0100013072.hg.1	9.06	8.02	2.06	0.0369	ATP13A2	ATPase type 13A2
TC1500006785.hg.1	10.26	11.6	-2.52	0.0372	ARHGAP11B; ARHGAP11A	Rho GTPase activating protein 11B; Rho GTPase activating protein 11A
TC2100007263.hg.1	5.8	4.67	2.19	0.0376	PDE9A	phosphodiesterase 9A
TC1900011406.hg.1	10.64	8.23	5.33	0.0376	LILRB5	leukocyte immunoglobulin-like receptor, subfamily B (with TM and ITIM domains), member 5
TC0500007972.hg.1	8.71	9.9	-2.29	0.0379	VCAN	versican
TC0300013336.hg.1	7.01	5.71	2.47	0.039	LAMP3	lysosomal-associated membrane protein 3
TC0100013636.hg.1	12.3	11.13	2.26	0.0394	RNF19B	ring finger protein 19B
TC1500009738.hg.1	9.71	10.76	-2.08	0.0396	KIAA0101; CSNK1G1	KIAA0101; casein kinase 1, gamma 1
TC0600011615.hg.1	6.72	7.75	-2.04	0.04	DEF6	Memczak2013 ANTISENSE, CDS, coding, INTERNAL best transcript NM_022047
TC1100013206.hg.1	9.48	8.38	2.15	0.0412	STARD10	StAR-related lipid transfer domain containing 10
TC1000008891.hg.1	8.4	9.74	-2.53	0.0415	DUSP5	dual specificity phosphatase 5
TC1400006551.hg.1	8.2	7.17	2.04	0.0418	ARHGEF40	Rho guanine nucleotide exchange factor (GEF) 40
TC1700012386.hg.1	9.8	8.64	2.24	0.0419	RFFL	ring finger and FYVE-like domain containing E3 ubiquitin protein ligase
TC2000007005.hg.1	7.56	5.94	3.08	0.042	CST7	cystatin F (leukocystatin)
TC2000009275.hg.1	5.97	4.66	2.47	0.042	OCSTAMP	osteoclast stimulatory transmembrane protein
TC0600009980.hg.1	7.75	6.72	2.04	0.0423	ZDHHC14	zinc finger, DHHC-type containing 14
TC1900010670.hg.1	12.36	8.84	11.54	0.0425	CLC	Charcot-Leyden crystal galectin
TC0X00006581.hg.1	8.47	7.46	2.02	0.0433	TBL1X	transducin (beta)-like 1X-linked
TC0100009395.hg.1	4.28	5.34	-2.08	0.0441	CD53	Memczak2013 ALT_ACCEPTOR, ALT_DONOR, coding, INTERNAL, intronic best transcript NM_001040033
TC0100017420.hg.1	10.69	9.3	2.63	0.0445	DUSP10	dual specificity phosphatase 10
TC1600010174.hg.1	4.93	5.98	-2.06	0.0448	MYLK3	myosin light chain kinase 3
TC0100014243.hg.1	9.71	10.76	-2.07	0.045	NDC1	NDC1 transmembrane nucleoporin
TC0100010310.hg.1	11.31	10.16	2.23	0.0451	SLAMF7	SLAM family member 7
TC1200012199.hg.1	9.45	8.16	2.45	0.0464	CAMKK2	calcium/calmodulin-dependent protein kinase kinase 2, beta
TC0500013352.hg.1	7.56	8.68	-2.17	0.0468	MEIKIN	meiotic kinetochore factor
TC1800008129.hg.1	3.85	4.94	-2.12	0.047	PTPN2	Transcript Identified by AceView, Entrez Gene ID(s) 5771
TC0100011253.hg.1	13.09	14.14	-2.07	0.0473	BTG2	BTG family, member 2
TC0600006873.hg.1	5.63	8.47	-7.11	0.048	BMP6	bone morphogenetic protein 6
TC1400010758.hg.1	4.24	3.12	2.19	0.048	CCDC175	coiled-coil domain containing 175
TC1100010349.hg.1	5.08	4.03	2.07	0.0485	SVIP	small VCP/p97-interacting protein
TC0700013290.hg.1	9.77	10.82	-2.07	0.0486	NCAPG2	non-SMC condensin II complex subunit G2
TC0X00007370.hg.1	2.8	4.03	-2.35	0.0491	APEX2	Transcript Identified by AceView, Entrez Gene ID(s) 27301
TC0600014105.hg.1	12.15	11.14	2.02	0.0497	C2	complement component 2
