# Supplementary material for: C5a Activates a Pro-Inflammatory Gene Expression Profile in Human Gaucher iPSC-Derived Macrophages
Source: Int J Mol Sci. 2021 Sep 14;22(18):9912. doi: 10.3390/ijms22189912 (PMC8466165; doi:10.3390/ijms22189912)
Supplement: Supplementary file 1 [file ijms-22-09912-s001.zip › Supplemental Table S3C.xlsx]

## Sheet: Sheet1
ClariomTM S Assay Transcript Cluster (TC) ID	unstimulated control Avg (log2)	C5a stimulated control Avg (log2)	Fold Change	P-val	Gene Symbol	Description
TC0600007596.hg.1	4.09	8.53	-21.69	2.25e-06	TNF	tumor necrosis factor
TC0100010231.hg.1	8.01	10.25	-4.7	5.6e-06	CD1E	CD1e molecule
TC0500012567.hg.1	12.16	10.16	4.01	8.29e-06	FAXDC2	fatty acid hydroxylase domain containing 2
TC0500012937.hg.1	6.94	9	-4.17	1.58e-05	NOP16	NOP16 nucleolar protein
TC0100018403.hg.1	11.75	9.89	3.63	1.83e-05	ERRFI1	ERBB receptor feedback inhibitor 1
TC0300012007.hg.1	10.05	8.03	4.04	2.11e-05	CD200R1	CD200 receptor 1
TC1200008165.hg.1	11.24	9.11	4.36	2.91e-05	KCNMB4	potassium channel subfamily M regulatory beta subunit 4
TC1100009533.hg.1	8.29	5.97	4.98	3.15e-05	ADAMTS15	ADAM metallopeptidase with thrombospondin type 1 motif 15
TC1300009271.hg.1	9.46	7.95	2.85	5.93e-05	TBC1D4	TBC1 domain family, member 4
TC0400012818.hg.1	12.98	11.49	2.81	6.71e-05	CCNG2	cyclin G2
TC1900010864.hg.1	8.81	11.28	-5.52	6.87e-05	KCNN4	potassium channel, calcium activated intermediate/small conductance subfamily N alpha, member 4
TC0500012299.hg.1	12.25	9.86	5.26	6.89e-05	PCDH12	protocadherin 12
TC0300007257.hg.1	8.53	9.89	-2.57	6.92e-05	CCR5	chemokine (C-C motif) receptor 5 (gene/pseudogene)
TC1700007557.hg.1	10.08	14.54	-21.95	6.96e-05	CCL2	chemokine (C-C motif) ligand 2
TC1400007860.hg.1	9.32	7.14	4.55	7.78e-05	FLRT2	fibronectin leucine rich transmembrane protein 2
TC0100007412.hg.1	8.54	6.7	3.58	7.9e-05	MAN1C1	mannosidase, alpha, class 1C, member 1
TC1900008329.hg.1	11.92	13.57	-3.15	8.02e-05	VASP	vasodilator-stimulated phosphoprotein
TC0200013916.hg.1	9.82	14.57	-26.97	8.7e-05	IL1B	interleukin 1 beta
TC1700010461.hg.1	7.2	11.17	-15.66	9.16e-05	CCL3L3; CCL3L1	chemokine (C-C motif) ligand 3-like 3; chemokine (C-C motif) ligand 3-like 1
TC0300006483.hg.1	9.16	11.05	-3.69	9.28e-05	BHLHE40	basic helix-loop-helix family, member e40
TC0900010445.hg.1	11.46	9.86	3.01	9.31e-05	NMRK1	nicotinamide riboside kinase 1
TC0400008902.hg.1	11.08	12.7	-3.07	0.0001	ABCE1	ATP binding cassette subfamily E member 1
TC0600012628.hg.1	8.32	9.67	-2.55	0.0001	NDUFAF4	NADH dehydrogenase (ubiquinone) complex I, assembly factor 4
TC0100016006.hg.1	9.06	10.93	-3.65	0.0001	GPATCH4	G-patch domain containing 4
TC0600009059.hg.1	11.99	10.71	2.43	0.0001	FOXO3	forkhead box O3
TC1500009214.hg.1	5.08	6.36	-2.42	0.0001	TGM5	transglutaminase 5
TC1900011775.hg.1	9.03	10.81	-3.42	0.0001	GRWD1	glutamate-rich WD repeat containing 1
TC0500013297.hg.1	10.09	8.76	2.52	0.0001	AMACR	alpha-methylacyl-CoA racemase
TC0500013153.hg.1	9.69	11.09	-2.64	0.0001	MTRR	5-methyltetrahydrofolate-homocysteine methyltransferase reductase
TC0300013471.hg.1	12.75	14.55	-3.48	0.0001	BCL6	B-cell CLL/lymphoma 6
TC1100011259.hg.1	4.66	5.99	-2.5	0.0001	FOSL1	FOS-like antigen 1
TC0700008023.hg.1	10.32	8.77	2.93	0.0002	GATSL2	GATS protein-like 2
TC1100010440.hg.1	5.88	4.44	2.71	0.0002	MPPED2	metallophosphoesterase domain containing 2
TC0500007972.hg.1	11.93	8.71	9.3	0.0002	VCAN	versican
TC1900007859.hg.1	5.78	9	-9.29	0.0002	FFAR2	free fatty acid receptor 2
TC1300007187.hg.1	8.79	10.02	-2.34	0.0002	TRIM13; KCNRG	tripartite motif containing 13; potassium channel regulator
TC1900008881.hg.1	6.55	9.21	-6.33	0.0002	FCAR	Fc fragment of IgA receptor
TC0100016431.hg.1	5.68	4.27	2.67	0.0002	TNFSF4	tumor necrosis factor (ligand) superfamily, member 4
TC1000010737.hg.1	9.31	7.82	2.81	0.0002	RHOBTB1	Rho-related BTB domain containing 1
TC1100013165.hg.1	14.22	15.5	-2.43	0.0002	SLC43A3	solute carrier family 43, member 3
TC0400011299.hg.1	10.02	8.16	3.63	0.0002	FAM13A	family with sequence similarity 13, member A
TC1300007774.hg.1	12.44	10.77	3.18	0.0002	MBNL2	muscleblind-like splicing regulator 2
TC1100008236.hg.1	10.49	12.48	-3.99	0.0002	CCND1	cyclin D1
TC0300008563.hg.1	12.9	11.74	2.25	0.0002	DIRC2	disrupted in renal carcinoma 2
TC1200009829.hg.1	7.35	10.01	-6.34	0.0002	CLEC4E	C-type lectin domain family 4, member E
TC1400006521.hg.1	11.56	13.31	-3.36	0.0002	PNP	purine nucleoside phosphorylase
TC0500009488.hg.1	11.73	9.99	3.35	0.0002	CREBRF	CREB3 regulatory factor
TC1900007340.hg.1	11.79	13.02	-2.34	0.0002	MAP1S	microtubule-associated protein 1S
TC0500012312.hg.1	4.18	6.07	-3.72	0.0002	SPRY4	sprouty RTK signaling antagonist 4
TC1400010749.hg.1	5.82	7.14	-2.49	0.0002	LINC01599	long intergenic non-protein coding RNA 1599
TC0300012718.hg.1	11.18	9.08	4.31	0.0002	PLOD2	procollagen-lysine, 2-oxoglutarate 5-dioxygenase 2
TC1100009524.hg.1	9.82	10.99	-2.25	0.0002	ST14	suppression of tumorigenicity 14 (colon carcinoma)
TC0200012863.hg.1	9.63	11.78	-4.45	0.0002	SPRED2	sprouty-related, EVH1 domain containing 2
TC0X00009580.hg.1	4.76	6.91	-4.43	0.0002	CFP	complement factor properdin
TC1500008485.hg.1	8.97	7.28	3.23	0.0002	IGF1R	insulin-like growth factor 1 receptor
TC0400010733.hg.1	7.61	5.13	5.55	0.0003	KDR	kinase insert domain receptor
TC0300013920.hg.1	6.95	9.03	-4.22	0.0003	NRROS	negative regulator of reactive oxygen species
TC2000008815.hg.1	8.18	9.36	-2.28	0.0003	BCL2L1	BCL2-like 1
TC0500011100.hg.1	9.7	12.35	-6.25	0.0003	ZNF366	zinc finger protein 366
TC0400011616.hg.1	5.6	7.27	-3.19	0.0003	TIFA	TRAF-interacting protein with forkhead-associated domain
TC0800008845.hg.1	7.36	10.35	-7.99	0.0003	MYC	v-myc avian myelocytomatosis viral oncogene homolog
TC1200010837.hg.1	8.37	10.44	-4.2	0.0003	GPR84	G protein-coupled receptor 84
TC1000008926.hg.1	10.2	11.34	-2.19	0.0003	ACSL5	acyl-CoA synthetase long-chain family member 5
TC1200009741.hg.1	4.97	6.64	-3.2	0.0003	NOP2	NOP2 nucleolar protein
TC1000007462.hg.1	6.36	7.45	-2.13	0.0003	ZNF22	zinc finger protein 22
TC0100014349.hg.1	9.97	11.32	-2.54	0.0003	JUN	jun proto-oncogene
TC1000007876.hg.1	10.17	11.53	-2.57	0.0003	DDX21	DEAD (Asp-Glu-Ala-Asp) box helicase 21
TC1800006882.hg.1	13	11.06	3.83	0.0003	CABLES1	Cdk5 and Abl enzyme substrate 1
TC1000011081.hg.1	9.59	8.17	2.66	0.0004	ZNF503	zinc finger protein 503
TC1100012019.hg.1	8.15	5.91	4.75	0.0004	SESN3	sestrin 3
TC1100008999.hg.1	8.7	11.25	-5.88	0.0004	ZC3H12C	zinc finger CCCH-type containing 12C
TC2000007545.hg.1	8.07	6.57	2.82	0.0004	EYA2	EYA transcriptional coactivator and phosphatase 2
TC0100010310.hg.1	8.46	11.31	-7.21	0.0004	SLAMF7	SLAM family member 7
TC1500009460.hg.1	9.09	7.71	2.59	0.0004	FAM214A	family with sequence similarity 214, member A
TC0700009072.hg.1	8.07	9.35	-2.43	0.0004	IRF5	interferon regulatory factor 5
TC0100014040.hg.1	8.66	7.1	2.95	0.0005	PIK3R3	phosphoinositide-3-kinase, regulatory subunit 3 (gamma)
TC0100013441.hg.1	9.43	11.09	-3.18	0.0005	FGR	FGR proto-oncogene, Src family tyrosine kinase
TC1100012219.hg.1	7.67	8.8	-2.19	0.0005	SLC35F2	solute carrier family 35, member F2
TC0600009143.hg.1	15.31	14.04	2.43	0.0005	SLC16A10	solute carrier family 16 (aromatic amino acid transporter), member 10
TC1500010753.hg.1	6.47	4.91	2.93	0.0005	TLN2	talin 2
TC0300009301.hg.1	4.75	6.9	-4.44	0.0005	PTX3	pentraxin 3, long
TC0100013608.hg.1	9.53	11.29	-3.37	0.0005	MARCKSL1	MARCKS-like 1
TC1700010393.hg.1	6.05	8.75	-6.49	0.0005	CCL1	chemokine (C-C motif) ligand 1
TC0600014189.hg.1	8.39	9.91	-2.86	0.0005	LTV1	LTV1 ribosome biogenesis factor
TC1400009973.hg.1	7.71	5.94	3.43	0.0005	RPS6KA5	ribosomal protein S6 kinase, 90kDa, polypeptide 5
TC1500008360.hg.1	9.61	10.78	-2.25	0.0005	SLCO3A1	solute carrier organic anion transporter family, member 3A1
TC1100008797.hg.1	11.21	12.21	-2	0.0005	PANX1	pannexin 1
TC1300006481.hg.1	10.22	9.13	2.12	0.0005	ZMYM2	zinc finger, MYM-type 2
TC1200008920.hg.1	9.53	10.76	-2.34	0.0006	OAS3	2-5-oligoadenylate synthetase 3
TC1100012984.hg.1	8.26	9.35	-2.13	0.0006	NAT10	N-acetyltransferase 10 (GCN5-related)
TC1500010733.hg.1	8.67	11.02	-5.09	0.0006	C15orf48; MIR147B	chromosome 15 open reading frame 48; microRNA 147b
TC0800007245.hg.1	9.07	10.24	-2.24	0.0006	MAK16	MAK16 homolog
TC1900007679.hg.1	8.4	9.87	-2.77	0.0006	PLEKHF1	pleckstrin homology domain containing, family F (with FYVE domain) member 1
TC0200016560.hg.1	5.42	4	2.69	0.0006	KLHL41	kelch-like family member 41
TC0700011982.hg.1	10.08	8.47	3.06	0.0006	GATS	GATS, stromal antigen 3 opposite strand
TC0300012815.hg.1	7.26	8.28	-2.03	0.0006	P2RY13	purinergic receptor P2Y, G-protein coupled, 13
TC1700012340.hg.1	7.03	8.08	-2.07	0.0006	NUP88	nucleoporin 88kDa
TC1900006576.hg.1	7.39	9.18	-3.46	0.0006	DOT1L	DOT1-like histone H3K79 methyltransferase
TC1400007595.hg.1	9.49	7.47	4.06	0.0006	SIPA1L1	signal-induced proliferation-associated 1 like 1
TC1300008573.hg.1	8.75	7.63	2.17	0.0007	STARD13	StAR-related lipid transfer domain containing 13
TC0700010257.hg.1	10.59	9.49	2.14	0.0007	ICA1	islet cell autoantigen 1
TC1200008275.hg.1	10.48	9.06	2.67	0.0007	SYT1	synaptotagmin I
TC1800008691.hg.1	9.23	8.05	2.26	0.0007	MRO	maestro
TC1500006788.hg.1	6.2	7.4	-2.31	0.0007	GREM1	gremlin 1, DAN family BMP antagonist
TC1700010459.hg.1	8.21	13.97	-54.25	0.0007	CCL3	chemokine (C-C motif) ligand 3
TC0800008146.hg.1	6.39	5.29	2.15	0.0007	WWP1	Transcript Identified by AceView, Entrez Gene ID(s) 11059
TC1500007942.hg.1	7.15	6.06	2.13	0.0008	HMG20A	Transcript Identified by AceView, Entrez Gene ID(s) 10363
TC0100015598.hg.1	14.52	13.38	2.21	0.0008	TXNIP	thioredoxin interacting protein
TC1100011022.hg.1	8.08	9.27	-2.27	0.0008	VPS37C	vacuolar protein sorting 37 homolog C (S. cerevisiae)
TC1700007620.hg.1	5.75	11.47	-52.42	0.0008	CCL4L2; CCL4; CCL4L1	chemokine (C-C motif) ligand 4-like 2; chemokine (C-C motif) ligand 4; chemokine (C-C motif) ligand 4-like 1
TC0300013277.hg.1	3.55	5.18	-3.1	0.0008	PEX5L	Transcript Identified by AceView, Entrez Gene ID(s) 51555
TC0100011566.hg.1	5.92	4.68	2.37	0.0008	PROX1	prospero homeobox 1
TC0700009682.hg.1	6.51	8.11	-3.02	0.0008	AOC1	amine oxidase, copper containing 1
TC1000009296.hg.1	9.84	11.63	-3.46	0.0008	PTPRE	protein tyrosine phosphatase, receptor type, E
TC1700007636.hg.1	7.28	8.36	-2.11	0.0008	PIGW	phosphatidylinositol glycan anchor biosynthesis class W
TC0200008870.hg.1	9.6	8.19	2.65	0.0009	BCL2L11	BCL2-like 11 (apoptosis facilitator)
TC0600009076.hg.1	6.81	4.99	3.53	0.0009	ARMC2	armadillo repeat containing 2
TC1300009765.hg.1	7.77	6.72	2.07	0.0009	IRS2	insulin receptor substrate 2
TC0200008930.hg.1	9.72	11.8	-4.25	0.0009	SLC20A1	solute carrier family 20 (phosphate transporter), member 1
TC1700012053.hg.1	5.83	6.92	-2.14	0.0009	FAAP100	Fanconi anemia core complex associated protein 100
TC0600011674.hg.1	9.92	10.98	-2.08	0.0009	PPIL1	peptidylprolyl isomerase (cyclophilin)-like 1
TC1600009351.hg.1	4.25	2.84	2.65	0.0009	GRIN2A	Transcript Identified by AceView, Entrez Gene ID(s) 2903
TC1200011002.hg.1	7.05	5.6	2.73	0.0009	LRIG3	leucine-rich repeats and immunoglobulin-like domains 3
TC0100010269.hg.1	13.45	14.91	-2.74	0.001	SLAMF8	SLAM family member 8
TC1400007706.hg.1	7.37	8.77	-2.64	0.001	FOS	FBJ murine osteosarcoma viral oncogene homolog
TC0500013401.hg.1	13.07	14.19	-2.18	0.001	LCP2	lymphocyte cytosolic protein 2
TC1200006909.hg.1	13.67	15.27	-3.04	0.001	EMP1	epithelial membrane protein 1
TC1000008904.hg.1	12.7	11.39	2.48	0.001	PDCD4; MIR4680	programmed cell death 4 (neoplastic transformation inhibitor); microRNA 4680
TC0700012377.hg.1	11.66	10.41	2.39	0.001	CTTNBP2	cortactin binding protein 2
TC0200008005.hg.1	8.23	6.9	2.52	0.001	DYSF	dysferlin
TC0300007720.hg.1	6.43	7.53	-2.13	0.001	KBTBD8	kelch repeat and BTB (POZ) domain containing 8
TC1800008891.hg.1	7.31	9.33	-4.06	0.001	BCL2	B-cell CLL/lymphoma 2
TC0100008779.hg.1	5.7	4.29	2.65	0.0011	ST6GALNAC3	ST6 (alpha-N-acetyl-neuraminyl-2,3-beta-galactosyl-1,3)-N-acetylgalactosaminide alpha-2,6-sialyltransferase 3
TC0100017748.hg.1	7.86	6.85	2.02	0.0011	SIPA1L2	signal-induced proliferation-associated 1 like 2
TC0100014910.hg.1	5.98	4.58	2.64	0.0011	TGFBR3	transforming growth factor beta receptor III
TC0500013384.hg.1	5.71	4.49	2.33	0.0011	PPP2R2B	protein phosphatase 2, regulatory subunit B, beta
TC1500010929.hg.1	8.5	6.94	2.95	0.0011	FAM174B	family with sequence similarity 174, member B
TC2100007446.hg.1	8.97	10.89	-3.78	0.0012	COL6A1	collagen, type VI, alpha 1
TC0900011659.hg.1	6.49	7.57	-2.1	0.0012	C9orf114	chromosome 9 open reading frame 114
TC0200008663.hg.1	10.33	12.93	-6.08	0.0012	IL1R2	interleukin 1 receptor, type II
TC1900007850.hg.1	6.02	7.25	-2.34	0.0013	CD22; MIR5196	CD22 molecule; microRNA 5196
TC0300013360.hg.1	9.88	8.77	2.16	0.0013	ABCC5	ATP binding cassette subfamily C member 5
TC1000011368.hg.1	4.97	6.55	-2.99	0.0013	ANKRD22	ankyrin repeat domain 22
TC1800008781.hg.1	10.88	11.99	-2.16	0.0013	ATP8B1	ATPase, aminophospholipid transporter, class I, type 8B, member 1
TC1700011815.hg.1	9.44	8.24	2.3	0.0014	MXRA7	matrix-remodelling associated 7
TC1500010796.hg.1	7.32	6.12	2.29	0.0014	SYNM	synemin, intermediate filament protein
TC1500009403.hg.1	8.61	10.24	-3.1	0.0014	TNFAIP8L3	tumor necrosis factor, alpha-induced protein 8-like 3
TC0700008011.hg.1	14.62	15.82	-2.3	0.0015	NCF1	neutrophil cytosolic factor 1
TC0200010284.hg.1	8.59	9.84	-2.38	0.0015	MYO1B	myosin IB
TC1200011470.hg.1	11.26	13.27	-4.01	0.0015	DUSP6	dual specificity phosphatase 6
TC1600010732.hg.1	8.84	10.35	-2.85	0.0015	NQO1	NAD(P)H dehydrogenase, quinone 1
TC1700011558.hg.1	9.75	11.32	-2.97	0.0015	SLC16A6	solute carrier family 16, member 6
TC1100011282.hg.1	7.72	6.62	2.14	0.0015	CD248	CD248 molecule, endosialin
TC0X00011238.hg.1	4.87	6.12	-2.38	0.0015	CLIC2	chloride intracellular channel 2
TC0100011374.hg.1	9.84	11.24	-2.64	0.0015	IKBKE	inhibitor of kappa light polypeptide gene enhancer in B-cells, kinase epsilon
TC0100006781.hg.1	5.94	7.22	-2.43	0.0016	SLC25A33	solute carrier family 25 (pyrimidine nucleotide carrier), member 33
TC0900011379.hg.1	9.84	8.56	2.43	0.0016	MEGF9	multiple EGF-like-domains 9
TC1700008867.hg.1	11.31	10.18	2.19	0.0016	SLC9A3R1; MIR3615	solute carrier family 9, subfamily A (NHE3, cation proton antiporter 3), member 3 regulator 1; microRNA 3615
TC0100011022.hg.1	12.31	10.37	3.85	0.0016	RGS2	regulator of G-protein signaling 2
TC1800006748.hg.1	9.05	10.22	-2.25	0.0016	SEH1L	SEH1-like nucleoporin
TC0500008296.hg.1	10.5	9.48	2.03	0.0016	MAN2A1	mannosidase, alpha, class 2A, member 1
TC1400010784.hg.1	5.74	7.04	-2.47	0.0017	SYNE3	spectrin repeat containing, nuclear envelope family member 3
TC1900008292.hg.1	9.36	10.48	-2.17	0.0017	TOMM40	translocase of outer mitochondrial membrane 40 homolog (yeast)
TC1900009684.hg.1	11.87	13.41	-2.91	0.0017	ACP5	acid phosphatase 5, tartrate resistant
TC0200010480.hg.1	9.58	10.73	-2.21	0.0017	NOP58	NOP58 ribonucleoprotein
TC1700010247.hg.1	7.54	6.37	2.25	0.0017	ABHD15	abhydrolase domain containing 15
TC0300013849.hg.1	4.4	3.34	2.09	0.0017	ROBO2	roundabout guidance receptor 2
TC0700006634.hg.1	8.12	9.28	-2.23	0.0017	AIMP2	aminoacyl tRNA synthetase complex-interacting multifunctional protein 2
TC0300009661.hg.1	12.84	11.34	2.82	0.0018	B3GNT5	UDP-GlcNAc:betaGal beta-1,3-N-acetylglucosaminyltransferase 5
TC0800010417.hg.1	12.25	11.21	2.06	0.0018	PCMTD1	protein-L-isoaspartate (D-aspartate) O-methyltransferase domain containing 1
TC0100012734.hg.1	10.12	13.41	-9.8	0.0018	TNFRSF9	tumor necrosis factor receptor superfamily, member 9
TC0600012061.hg.1	10.25	9.08	2.25	0.0018	ICK	intestinal cell (MAK-like) kinase
TC0700007997.hg.1	11.75	12.92	-2.26	0.0019	LIMK1	LIM domain kinase 1
TC0200007102.hg.1	12.52	11.06	2.75	0.002	PLB1	phospholipase B1
TC0100018238.hg.1	10.05	8.93	2.17	0.002	DNAJB4	DnaJ (Hsp40) homolog, subfamily B, member 4
TC0500009072.hg.1	5.54	6.83	-2.44	0.002	PPARGC1B	peroxisome proliferator-activated receptor gamma, coactivator 1 beta
TC0100008874.hg.1	11.45	10.42	2.03	0.002	PRKACB	protein kinase, cAMP-dependent, catalytic, beta
TC1100011190.hg.1	9.22	11.95	-6.61	0.0021	EHD1	EH domain containing 1
TC0100009364.hg.1	10.17	13.34	-9.02	0.0021	CSF1	colony stimulating factor 1 (macrophage)
TC0700011675.hg.1	4.66	3.37	2.44	0.0021	SEMA3D	sema domain, immunoglobulin domain (Ig), short basic domain, secreted, (semaphorin) 3D
TC1100008330.hg.1	13.25	14.51	-2.4	0.0021	IL18BP	interleukin 18 binding protein
TC0200015211.hg.1	14.26	12.81	2.73	0.0021	SLC40A1	solute carrier family 40 (iron-regulated transporter), member 1
TC0100012211.hg.1	7.74	6.73	2.01	0.0021	ZBTB18	zinc finger and BTB domain containing 18
TC1900007748.hg.1	9.36	10.46	-2.15	0.0022	PDCD5	programmed cell death 5
TC0100012921.hg.1	11.34	10.04	2.46	0.0022	DHRS3; MIR6730	dehydrogenase/reductase (SDR family) member 3; microRNA 6730
TC0400008879.hg.1	10.63	9.29	2.52	0.0022	GAB1	GRB2-associated binding protein 1
TC0300011152.hg.1	8.62	9.91	-2.46	0.0022	DUSP7	dual specificity phosphatase 7
TC2000007686.hg.1	10.79	12.01	-2.32	0.0023	LINC01272	long intergenic non-protein coding RNA 1272
TC1000008767.hg.1	10.92	12.07	-2.22	0.0023	INA	internexin neuronal intermediate filament protein, alpha
TC1000009092.hg.1	12.45	11.18	2.41	0.0024	INPP5F	inositol polyphosphate-5-phosphatase F
TC0300010714.hg.1	7.63	6.38	2.38	0.0024	TRANK1	tetratricopeptide repeat and ankyrin repeat containing 1
TC0500013336.hg.1	12.72	11.37	2.55	0.0024	SSBP2	single-stranded DNA binding protein 2
TC0100016678.hg.1	10.85	11.86	-2.01	0.0025	FAM129A	family with sequence similarity 129, member A
TC0900006442.hg.1	5.1	7.66	-5.9	0.0025	KANK1	KN motif and ankyrin repeat domains 1
TC0600008027.hg.1	6.72	8.05	-2.51	0.0025	BYSL	bystin-like
TC2000007283.hg.1	10.87	13.31	-5.42	0.0025	SRC	SRC proto-oncogene, non-receptor tyrosine kinase
TC0600006950.hg.1	8.92	7.78	2.2	0.0025	TMEM170B	transmembrane protein 170B
TC1100011614.hg.1	10.72	9.71	2.01	0.0025	KCNE3	potassium channel, voltage gated subfamily E regulatory beta subunit 3
TC0700011785.hg.1	8.75	10.03	-2.42	0.0025	CDK6	cyclin-dependent kinase 6
TC0300007466.hg.1	10.84	12.84	-4.01	0.0025	ALAS1	5-aminolevulinate synthase 1
TC0600007060.hg.1	9.33	7.46	3.66	0.0026	MYLIP; MIR4639	myosin regulatory light chain interacting protein; microRNA 4639
TC0400009048.hg.1	12.18	13.34	-2.23	0.0027	TLR2	toll-like receptor 2
TC0400012938.hg.1	10.2	11.93	-3.33	0.0027	RASGEF1B	RasGEF domain family member 1B
TC0200010811.hg.1	7.67	9.7	-4.07	0.0027	CYP27A1	cytochrome P450, family 27, subfamily A, polypeptide 1
TC0700006984.hg.1	9.85	11.06	-2.31	0.0027	SNX10	sorting nexin 10
TC0100018438.hg.1	10.17	11.22	-2.07	0.0027	MOB3C	MOB kinase activator 3C
TC1700009515.hg.1	5.73	6.76	-2.04	0.0028	MYBBP1A	MYB binding protein (P160) 1a
TC1500010184.hg.1	9.44	12.33	-7.44	0.0028	BCL2A1	BCL2-related protein A1
TC0600009622.hg.1	9.92	8.85	2.09	0.0028	CCDC28A	coiled-coil domain containing 28A
TC0200014991.hg.1	10.15	8.57	2.99	0.0029	GPR155	G protein-coupled receptor 155
TC0500007154.hg.1	8.58	10.29	-3.26	0.0029	SLC1A3	solute carrier family 1 (glial high affinity glutamate transporter), member 3
TC0100013873.hg.1	7.52	10	-5.6	0.0029	HIVEP3	human immunodeficiency virus type I enhancer binding protein 3
TC0100018315.hg.1	9.15	10.18	-2.04	0.0029	UCK2; MIR3658	uridine-cytidine kinase 2; microRNA 3658
TC2000008121.hg.1	5.61	4.47	2.21	0.0029	C20orf96	chromosome 20 open reading frame 96
TC1000007272.hg.1	14.75	12.79	3.89	0.0029	CREM	cAMP responsive element modulator
TC0100011696.hg.1	8.06	5.79	4.83	0.0029	FAM177B	family with sequence similarity 177, member B
TC0400009137.hg.1	10.1	11.15	-2.07	0.003	FNIP2	folliculin interacting protein 2
TC0900008776.hg.1	9.14	7.88	2.41	0.003	MVB12B	multivesicular body subunit 12B
TC1700011704.hg.1	9.23	10.29	-2.09	0.0031	CD300E	CD300e molecule
TC1300009309.hg.1	8.98	7.76	2.34	0.0031	EDNRB	endothelin receptor type B
TC0800010034.hg.1	12.47	13.49	-2.03	0.0031	GSR	glutathione reductase
TC1100008736.hg.1	9.51	7.87	3.13	0.0031	NAALAD2	N-acetylated alpha-linked acidic dipeptidase 2
TC0X00006799.hg.1	13.87	12.65	2.33	0.0032	SAT1	spermidine/spermine N1-acetyltransferase 1
TC0300006580.hg.1	5.77	9.75	-15.72	0.0032	IRAK2	interleukin 1 receptor associated kinase 2
TC2100007327.hg.1	9.54	10.64	-2.14	0.0032	RRP1	ribosomal RNA processing 1
TC0200014108.hg.1	10.06	11.19	-2.19	0.0033	NIFK	nucleolar protein interacting with the FHA domain of MKI67
TC1700007626.hg.1	5.41	9.98	-23.87	0.0033	CCL4L2; CCL4L1	chemokine (C-C motif) ligand 4-like 2; chemokine (C-C motif) ligand 4-like 1
TC1400009585.hg.1	6.72	5.66	2.09	0.0034	MAP3K9	mitogen-activated protein kinase kinase kinase 9
TC0700006669.hg.1	8.9	10.02	-2.17	0.0034	MIOS	missing oocyte, meiosis regulator, homolog (Drosophila)
TC0100010218.hg.1	6.4	5.32	2.11	0.0034	KIRREL	kin of IRRE like (Drosophila)
TC1200011844.hg.1	8.63	9.92	-2.45	0.0034	TMEM119	transmembrane protein 119
TC0X00010473.hg.1	9.19	7.76	2.69	0.0035	TSC22D3	TSC22 domain family, member 3
TC0300008482.hg.1	7.26	8.3	-2.05	0.0036	ADPRH	ADP-ribosylarginine hydrolase
TC0600010021.hg.1	9.83	7.4	5.38	0.0036	SYTL3	synaptotagmin-like 3
TC1600009068.hg.1	3.97	4.99	-2.03	0.0036	MEIOB; LINC00254	meiosis specific with OB domains; long intergenic non-protein coding RNA 254
TC1500010737.hg.1	7.47	9.36	-3.71	0.0036	SQRDL	sulfide quinone reductase-like (yeast)
TC0100012167.hg.1	8.96	11.74	-6.89	0.0036	KMO	kynurenine 3-monooxygenase (kynurenine 3-hydroxylase)
TC2000009204.hg.1	9.83	11.02	-2.29	0.0037	TOMM34	translocase of outer mitochondrial membrane 34
TC1900011800.hg.1	8.4	9.91	-2.86	0.0037	LILRB4	leukocyte immunoglobulin-like receptor, subfamily B (with TM and ITIM domains), member 4
TC0700011584.hg.1	12.6	13.65	-2.08	0.0038	FGL2	fibrinogen-like 2
TC0X00007274.hg.1	7.65	5.46	4.56	0.0039	MAGED4B; MAGED4; SNORA11D	melanoma antigen family D4B; melanoma antigen family D4; small nucleolar RNA, H/ACA box 11D
TC1700007558.hg.1	7.15	9.01	-3.64	0.0039	CCL7	chemokine (C-C motif) ligand 7
TC1200006718.hg.1	4.6	5.73	-2.18	0.0039	CLEC6A	C-type lectin domain family 6, member A
TC1000010699.hg.1	11.09	10.07	2.02	0.0039	IPMK	inositol polyphosphate multikinase
TC1100007216.hg.1	8.83	7.65	2.26	0.0039	PRRG4	proline rich Gla (G-carboxyglutamic acid) 4 (transmembrane)
TC0800011683.hg.1	6.47	5.23	2.36	0.004	FBXO32	F-box protein 32
TC1700011561.hg.1	12.98	11.74	2.37	0.004	WIPI1	WD repeat domain, phosphoinositide interacting 1
TC0200016770.hg.1	8.31	9.54	-2.34	0.004	MIR6809; TNS1	microRNA 6809; tensin 1
TC0600008611.hg.1	2.47	3.49	-2.02	0.004	SH3BGRL2	Transcript Identified by AceView, Entrez Gene ID(s) 83699
TC2000008037.hg.1	7.51	8.82	-2.48	0.0041	SLC17A9	solute carrier family 17 (vesicular nucleotide transporter), member 9
TC1100013015.hg.1	10.96	9.77	2.28	0.0041	MS4A14	membrane-spanning 4-domains, subfamily A, member 14
TC1500008757.hg.1	5.52	6.95	-2.69	0.0042	ATP10A	ATPase, class V, type 10A
TC0500011146.hg.1	11.1	9.91	2.29	0.0042	ENC1	ectodermal-neural cortex 1 (with BTB domain)
TC0100010672.hg.1	9.05	7.87	2.26	0.0045	RABGAP1L	RAB GTPase activating protein 1-like
TC2000008653.hg.1	12.7	11.5	2.29	0.0045	CD93	CD93 molecule
TC0100016427.hg.1	3.44	4.9	-2.75	0.0045	TNFSF18	tumor necrosis factor (ligand) superfamily, member 18
TC0100015932.hg.1	8.71	7.69	2.02	0.0046	PBXIP1	pre-B-cell leukemia homeobox interacting protein 1
TC0700010989.hg.1	12.92	14.42	-2.84	0.0046	TNS3	tensin 3
TC0300010038.hg.1	4.68	3.62	2.09	0.0047	SENP5	Transcript Identified by AceView, Entrez Gene ID(s) 205564
TC2200008475.hg.1	9.87	8.19	3.19	0.0047	PIK3IP1	phosphoinositide-3-kinase interacting protein 1
TC2200007014.hg.1	6.24	7.28	-2.05	0.0048	GAS2L1	growth arrest-specific 2 like 1
TC1600009935.hg.1	6.39	7.93	-2.91	0.0048	SPN	Memczak2013 ANTISENSE, CDS, coding, INTERNAL best transcript NM_003123
TC0500013364.hg.1	10.59	13.35	-6.77	0.0049	TIFAB	TRAF-interacting protein with forkhead-associated domain, family member B
TC0200009067.hg.1	12.7	11.45	2.37	0.005	TMEM37	transmembrane protein 37
TC0800012026.hg.1	6.94	5.71	2.35	0.005	SLC45A4	solute carrier family 45, member 4
TC0100014768.hg.1	4.78	6.85	-4.2	0.005	MCOLN2	mucolipin 2
TC0600012875.hg.1	8.98	9.99	-2.02	0.0051	FYN	FYN proto-oncogene, Src family tyrosine kinase
TC0100014531.hg.1	7.38	5.34	4.12	0.0051	WLS	wntless Wnt ligand secretion mediator
TC0700013342.hg.1	11.16	8.97	4.57	0.0051	CHN2	chimerin 2
TC0700009677.hg.1	10.85	9.67	2.27	0.0053	GIMAP4	GTPase, IMAP family member 4
TC0600012656.hg.1	5.03	6.06	-2.04	0.0054	USP45	ubiquitin specific peptidase 45
TC0200016424.hg.1	11.71	13.11	-2.63	0.0054	LBH	limb bud and heart development
TC1700012382.hg.1	7.62	5.99	3.09	0.0055	OMG	oligodendrocyte myelin glycoprotein
TC1100007841.hg.1	4.08	5.15	-2.1	0.0056	SCGB2A2	secretoglobin, family 2A, member 2
TC0X00008857.hg.1	9.13	10.2	-2.09	0.0056	DKC1; SNORA36A; SNORA56; MIR664B	dyskeratosis congenita 1, dyskerin; small nucleolar RNA, H/ACA box 36A; small nucleolar RNA, H/ACA box 56; microRNA 664b
TC2100007208.hg.1	9.81	11.17	-2.55	0.0056	MX1	MX dynamin-like GTPase 1
TC1200008732.hg.1	3.79	4.82	-2.04	0.0057	RFX4	Transcript Identified by AceView, Entrez Gene ID(s) 5992
TC0400009038.hg.1	7.67	8.76	-2.12	0.0057	KIAA0922	KIAA0922
TC0400009221.hg.1	12.3	13.34	-2.06	0.0058	MSMO1	methylsterol monooxygenase 1
TC1200009903.hg.1	9.52	8.33	2.28	0.0058	KLRC4-KLRK1; KLRK1; KLRC4	KLRC4-KLRK1 readthrough; killer cell lectin-like receptor subfamily K, member 1; killer cell lectin-like receptor subfamily C, member 4
TC1900008044.hg.1	4.71	5.78	-2.1	0.0059	NCCRP1	non-specific cytotoxic cell receptor protein 1 homolog (zebrafish)
TC0800011150.hg.1	10.82	9.82	2	0.0059	TP53INP1	tumor protein p53 inducible nuclear protein 1
TC0100010152.hg.1	14.68	15.81	-2.19	0.006	LMNA	lamin A/C
TC1200012731.hg.1	6.95	8.04	-2.13	0.0061	PGAM5	PGAM family member 5, serine/threonine protein phosphatase, mitochondrial
TC1300006861.hg.1	4.82	3.7	2.17	0.0062	NBEA	neurobeachin
TC0800008126.hg.1	9.59	10.84	-2.37	0.0063	CA2	carbonic anhydrase II
TC0500012470.hg.1	12.72	13.9	-2.28	0.0063	CD74	CD74 molecule, major histocompatibility complex, class II invariant chain
TC0X00008911.hg.1	10.86	9.28	2.98	0.0064	P2RY8	purinergic receptor P2Y, G-protein coupled, 8
TC0Y00006887.hg.1	10.86	9.28	2.98	0.0064	P2RY8	Homo sapiens purinergic receptor P2Y, G-protein coupled, 8 (P2RY8), mRNA.; purinergic receptor P2Y, G-protein coupled, 8 [Source:HGNC Symbol;Acc:HGNC:15524]; Homo sapiens purinergic receptor P2Y, G-protein coupled, 8, mRNA (cDNA clone MGC:50878 IMAGE:5787268), complete cds.
TC1000007081.hg.1	7.25	8.28	-2.05	0.0064	PDSS1	prenyl (decaprenyl) diphosphate synthase, subunit 1
TC1100011032.hg.1	12.96	14.14	-2.27	0.0065	CYB561A3	cytochrome b561 family, member A3
TC0100016476.hg.1	5.03	6.09	-2.09	0.0067	KIAA0040	KIAA0040
TC1700006909.hg.1	5.82	4.5	2.5	0.0067	MYOCD	myocardin
TC0100010874.hg.1	13.75	14.83	-2.11	0.0067	RGL1	ral guanine nucleotide dissociation stimulator-like 1
TC0700013354.hg.1	13.28	12.25	2.05	0.0067	GPR141	G protein-coupled receptor 141
TC0500007201.hg.1	5.71	4.04	3.18	0.0069	OSMR	oncostatin M receptor
TC0500010453.hg.1	6.05	4.63	2.67	0.0069	ADAMTS12	ADAM metallopeptidase with thrombospondin type 1 motif 12
TC1100011011.hg.1	4.08	5.15	-2.1	0.0069	PRPF19	Memczak2013 ALT_ACCEPTOR, ALT_DONOR, coding, INTERNAL, intronic best transcript NM_014502
TC0500010869.hg.1	7.05	8.38	-2.51	0.0071	ELOVL7	ELOVL fatty acid elongase 7
TC0400008556.hg.1	8.42	6.12	4.9	0.0071	MYOZ2	myozenin 2
TC0100013076.hg.1	9.94	7.89	4.14	0.0072	PADI2	peptidyl arginine deiminase, type II
TC0600007650.hg.1	11.89	13.59	-3.25	0.0073	HLA-DRA	major histocompatibility complex, class II, DR alpha
TC0600012801.hg.1	10.74	9.72	2.04	0.0073	SESN1	sestrin 1
TC0900011423.hg.1	6.48	7.48	-2.01	0.0074	TTLL11	tubulin tyrosine ligase-like family member 11
TC0200016767.hg.1	5.98	7.38	-2.64	0.0075	MREG	melanoregulin
TC0300006627.hg.1	5.53	6.7	-2.26	0.0075	TSEN2	TSEN2 tRNA splicing endonuclease subunit
TC1200012016.hg.1	8.26	6.78	2.8	0.0075	TBX3	T-box 3
TSUnmapped00000003.hg.1	4.61	8.17	-11.76	0.0077	SLC2A6	solute carrier family 2 (facilitated glucose transporter), member 6 [Source:HGNC Symbol;Acc:HGNC:11011]
TC0300009673.hg.1	11.56	10.4	2.23	0.0077	KLHL24	kelch-like family member 24
TC0100014685.hg.1	7.23	6.16	2.1	0.0078	ADGRL4	adhesion G protein-coupled receptor L4
TC0100007136.hg.1	9.15	7.93	2.32	0.0079	IGSF21	immunoglobin superfamily, member 21
TC0600014273.hg.1	10.48	12.09	-3.05	0.0079	HLA-DRB1	major histocompatibility complex, class II, DR beta 1
TC2000008381.hg.1	7.75	6.2	2.94	0.008	JAG1	jagged 1
TC1600008220.hg.1	10.82	11.91	-2.13	0.0081	UTP4	UTP4 small subunit (SSU) processome component
TC0800008324.hg.1	7.06	5.22	3.58	0.0083	MATN2	matrilin 2
TC0700011797.hg.1	8.25	9.29	-2.06	0.0084	SAMD9L	sterile alpha motif domain containing 9-like
TC0500007761.hg.1	6.27	8.47	-4.58	0.0084	TMEM171	transmembrane protein 171
TSUnmapped00000123.hg.1	5.7	9.29	-12.06	0.0084	SLC2A6	solute carrier family 2 (facilitated glucose transporter), member 6 [Source:HGNC Symbol;Acc:HGNC:11011]
TC1600008226.hg.1	9.95	10.96	-2.02	0.0088	NIP7	NIP7, nucleolar pre-rRNA processing protein
TC1900011913.hg.1	5.53	4.52	2.02	0.0088	LINC00663	long intergenic non-protein coding RNA 663
TC1100011257.hg.1	9.83	8.45	2.61	0.009	EFEMP2	EGF containing fibulin-like extracellular matrix protein 2
TC0700011561.hg.1	8.8	10.16	-2.56	0.0091	CCL24	chemokine (C-C motif) ligand 24
TC1700008549.hg.1	9.12	8.05	2.11	0.0091	TANC2	tetratricopeptide repeat, ankyrin repeat and coiled-coil containing 2
TC1700012433.hg.1	7.8	6.44	2.56	0.0092	HOXB6	homeobox B6
TC1500010655.hg.1	9.94	11	-2.08	0.0092	CHSY1	chondroitin sulfate synthase 1
TC1700007262.hg.1	8.14	9.6	-2.75	0.0094	MAP2K3	mitogen-activated protein kinase kinase 3
TC0900011393.hg.1	7.02	10.38	-10.24	0.0094	TRAF1	TNF receptor-associated factor 1
TC0100015717.hg.1	6.85	5.62	2.35	0.0094	OTUD7B	OTU deubiquitinase 7B
TC0200010733.hg.1	6.52	5.29	2.35	0.0094	XRCC5	Memczak2013 ALT_ACCEPTOR, ALT_DONOR, coding, INTERNAL, intronic best transcript NM_021141
TC2200009234.hg.1	6.5	9.76	-9.58	0.0095	SPECC1L-ADORA2A	SPECC1L-ADORA2A readthrough (NMD candidate)
TC0100016139.hg.1	11.2	12.38	-2.27	0.0098	CD48	CD48 molecule
TC0X00010098.hg.1	6.4	5.22	2.26	0.0098	KIAA2022	KIAA2022
TC1800008580.hg.1	9.87	11.86	-3.98	0.0099	PSTPIP2	proline-serine-threonine phosphatase interacting protein 2
TC0200010216.hg.1	13.17	12.16	2.01	0.0099	ITGAV	integrin alpha V
TC0600008981.hg.1	10.43	11.72	-2.45	0.0101	AIM1	absent in melanoma 1
TC0600007788.hg.1	5.6	4.44	2.23	0.0104	SCUBE3	signal peptide, CUB domain, EGF-like 3
TC1900011985.hg.1	7.58	8.63	-2.08	0.0104	DMWD	dystrophia myotonica, WD repeat containing
TC0700011586.hg.1	7.36	8.52	-2.24	0.0104	GSAP	gamma-secretase activating protein
TC0900008441.hg.1	8.19	9.22	-2.04	0.0107	UGCG	UDP-glucose ceramide glucosyltransferase
TC1900009310.hg.1	7.88	9.62	-3.32	0.0109	MATK	megakaryocyte-associated tyrosine kinase
TC1900010863.hg.1	9.61	10.68	-2.1	0.011	SMG9	SMG9 nonsense mediated mRNA decay factor
TC0300006847.hg.1	10.06	8.87	2.28	0.0115	NR1D2	nuclear receptor subfamily 1, group D, member 2
TC0100009959.hg.1	8.96	7.78	2.27	0.0115	TUFT1	tuftelin 1
TC1500007829.hg.1	8.26	6.19	4.2	0.0116	LOXL1	lysyl oxidase-like 1
TSUnmapped00000286.hg.1	4.4	5.41	-2.02	0.0117	HMBS	hydroxymethylbilane synthase
TC1300007718.hg.1	9.65	8.64	2.01	0.0117	GPC6	glypican 6
TC0600007657.hg.1	6.69	8.71	-4.04	0.0118	HLA-DQA1	major histocompatibility complex, class II, DQ alpha 1
TC1200009157.hg.1	8.82	10.08	-2.39	0.0118	P2RX7	purinergic receptor P2X, ligand gated ion channel, 7
TC1700012274.hg.1	8.1	9.11	-2.01	0.0121	ITGB3	integrin beta 3
TC0100007447.hg.1	4.48	5.55	-2.1	0.0122	CEP85	centrosomal protein 85kDa
TC0400008284.hg.1	4.8	3.51	2.44	0.0126	UBE2D3	Memczak2013 ANTISENSE, coding, INTERNAL, intronic best transcript NM_181893
TC0100015079.hg.1	6.78	5.61	2.25	0.0132	EXTL2	exostosin-like glycosyltransferase 2
TC0500007881.hg.1	8.11	7.09	2.03	0.0133	JMY	junction mediating and regulatory protein, p53 cofactor
TC0100018220.hg.1	4.88	3.84	2.06	0.0133	CCDC30	coiled-coil domain containing 30
TC0700007398.hg.1	7.04	8.41	-2.59	0.0133	ZMIZ2	zinc finger, MIZ-type containing 2
TC0200007155.hg.1	8.99	7.92	2.11	0.0133	EHD3	EH domain containing 3
TC0400010256.hg.1	7.07	6.01	2.09	0.0136	CCDC149	coiled-coil domain containing 149
TC0100012787.hg.1	10.68	8.81	3.65	0.0137	SLC2A5	solute carrier family 2 (facilitated glucose/fructose transporter), member 5
TC1900008824.hg.1	13.46	14.65	-2.28	0.0137	MYADM	myeloid-associated differentiation marker
TC1100010038.hg.1	8.04	7.03	2.01	0.014	ST5	suppression of tumorigenicity 5
TC0800010783.hg.1	7.57	10.59	-8.13	0.0141	MSC	musculin
TC1700007617.hg.1	6.77	8.3	-2.88	0.0142	CCL18	chemokine (C-C motif) ligand 18
TC0800009816.hg.1	9.98	12.04	-4.15	0.0143	GFRA2	GDNF family receptor alpha 2
TC1200011991.hg.1	8.28	7.19	2.13	0.0144	IQCD	IQ motif containing D
TC1900011382.hg.1	9.48	10.96	-2.8	0.0146	MYADM	Memczak2013 ANTISENSE, CDS, coding, INTERNAL best transcript NM_001020819
TC1500009173.hg.1	11.9	13.03	-2.18	0.0147	EHD4	EH domain containing 4
TC1600011440.hg.1	7	8.83	-3.55	0.0148	OSGIN1	oxidative stress induced growth inhibitor 1
TC1000010768.hg.1	9.2	12.01	-7.03	0.015	EGR2	early growth response 2
TC1900008036.hg.1	5.69	6.69	-2	0.0156	MRPS12	mitochondrial ribosomal protein S12
TC0300012238.hg.1	8.3	7.19	2.16	0.0156	HEG1	heart development protein with EGF-like domains 1
TC0100013713.hg.1	11.7	13.17	-2.78	0.0157	STK40	serine/threonine kinase 40
TC0100010755.hg.1	8.52	7.36	2.24	0.016	RALGPS2	Ral GEF with PH domain and SH3 binding motif 2
TC1600011350.hg.1	7.26	8.33	-2.1	0.0161	PMM2	phosphomannomutase 2
TC1000009152.hg.1	10.2	8.62	2.99	0.0164	HTRA1	HtrA serine peptidase 1
TC0700007477.hg.1	6.5	7.5	-2	0.0166	UPP1	uridine phosphorylase 1
TC0900012153.hg.1	8.97	10.21	-2.36	0.0167	MSANTD3	Myb/SANT-like DNA-binding domain containing 3
TC1200006688.hg.1	5.46	4.43	2.04	0.017	NANOG	Nanog homeobox
TC1200008726.hg.1	10.17	8.91	2.39	0.017	TCP11L2	t-complex 11, testis-specific-like 2
TC1200007775.hg.1	5.92	4.22	3.23	0.017	MUCL1	mucin-like 1
TC1700010200.hg.1	9.21	7.98	2.33	0.0171	ALDOC	aldolase C, fructose-bisphosphate
TC1500010369.hg.1	12.42	10.89	2.89	0.0171	MFGE8	milk fat globule-EGF factor 8 protein
TC0800009673.hg.1	6.27	7.67	-2.64	0.0174	LONRF1	LON peptidase N-terminal domain and ring finger 1
TC0900010773.hg.1	7.24	5.96	2.43	0.0183	ROR2	receptor tyrosine kinase-like orphan receptor 2
TC1400010730.hg.1	5.94	4.86	2.12	0.0183	EGLN3	egl-9 family hypoxia-inducible factor 3
TC1600009952.hg.1	13.22	11.89	2.51	0.0189	YPEL3	yippee like 3
TC0300012323.hg.1	10.08	11.34	-2.4	0.019	MGLL	monoglyceride lipase
TC0800007899.hg.1	7.64	6.47	2.25	0.0191	SULF1	sulfatase 1
TC0500010835.hg.1	7.61	6.33	2.43	0.0192	PLK2	polo-like kinase 2
TC0100013368.hg.1	7.87	6.81	2.09	0.0195	PAQR7	progestin and adipoQ receptor family member VII
TC0600011517.hg.1	7.73	8.82	-2.13	0.0202	HLA-DPA1	major histocompatibility complex, class II, DP alpha 1
TC0500008785.hg.1	6.55	8.21	-3.16	0.0203	EGR1	early growth response 1
TC1500007822.hg.1	11.15	12.4	-2.38	0.0205	CD276	CD276 molecule
TC0500013363.hg.1	7.45	9.2	-3.35	0.0206	DCANP1	dendritic cell-associated nuclear protein
TC1000006633.hg.1	7.39	8.54	-2.21	0.0211	FAM208B	family with sequence similarity 208, member B
TC1200010182.hg.1	12.41	13.94	-2.88	0.0212	BHLHE41	basic helix-loop-helix family, member e41
TC1200011313.hg.1	5.22	6.42	-2.3	0.0212	NAP1L1	Memczak2013 ALT_ACCEPTOR, ALT_DONOR, coding, INTERNAL, intronic best transcript NM_139207
TC0200015226.hg.1	5.87	4.49	2.6	0.0215	HIBCH	Transcript Identified by AceView, Entrez Gene ID(s) 26275
TC1400008767.hg.1	7.15	5.83	2.5	0.0215	STXBP6	syntaxin binding protein 6 (amisyn)
TC0900011072.hg.1	14.41	13.26	2.23	0.0216	ABCA1	ATP binding cassette subfamily A member 1
TC1100010054.hg.1	9.87	11.11	-2.37	0.0216	NRIP3	nuclear receptor interacting protein 3
TC0600010078.hg.1	5.63	3.99	3.12	0.0216	SLC22A3	solute carrier family 22 (organic cation transporter), member 3
TSUnmapped00000051.hg.1	6.12	9.23	-8.64	0.0221	SLC2A6	solute carrier family 2 (facilitated glucose transporter), member 6 [Source:HGNC Symbol;Acc:HGNC:11011]
TC1000006816.hg.1	8.8	10.14	-2.53	0.0226	OPTN	optineurin
TC1700011566.hg.1	6.72	5.52	2.3	0.0232	FAM20A	family with sequence similarity 20, member A
TC1000006464.hg.1	7.74	8.79	-2.08	0.0234	GTPBP4	GTP binding protein 4
TC0800011137.hg.1	8.06	6.93	2.2	0.0235	RAD54B; FSBP	RAD54 homolog B (S. cerevisiae); fibrinogen silencer binding protein
TC0200011287.hg.1	6.82	7.94	-2.17	0.0239	ASB1	ankyrin repeat and SOCS box containing 1
TC0300008467.hg.1	13.01	14.26	-2.38	0.0241	ARHGAP31	Rho GTPase activating protein 31
TC1000010065.hg.1	10.79	9.49	2.47	0.0243	ARHGAP21	Rho GTPase activating protein 21
TC1900008564.hg.1	9.26	11.24	-3.97	0.0247	ATF5; MIR4751	activating transcription factor 5; microRNA 4751
TC0X00011226.hg.1	6.48	5.19	2.44	0.0249	F8	coagulation factor VIII, procoagulant component
TC0500010924.hg.1	4.78	3.3	2.78	0.025	ADAMTS6	ADAM metallopeptidase with thrombospondin type 1 motif 6
TC1700009612.hg.1	8.27	9.33	-2.08	0.0251	CLEC10A	C-type lectin domain family 10, member A
TC0200016679.hg.1	5.88	7.05	-2.26	0.0252	SERTAD2	SERTA domain containing 2
TC1400009175.hg.1	4.99	3.41	2.98	0.0252	NID2	nidogen 2 (osteonidogen)
TC1500009056.hg.1	4.24	7.28	-8.23	0.0256	RASGRP1	RAS guanyl releasing protein 1 (calcium and DAG-regulated)
TC0600007677.hg.1	9.34	10.35	-2.02	0.026	HLA-DPB1	major histocompatibility complex, class II, DP beta 1
TSUnmapped00000571.hg.1	5.48	6.64	-2.25	0.0262	GREM1	gremlin 1, DAN family BMP antagonist [Source:HGNC Symbol;Acc:HGNC:2001]
TC1300006979.hg.1	10.96	12.7	-3.34	0.0264	RGCC	regulator of cell cycle
TC0900011850.hg.1	7.19	9.81	-6.12	0.0269	SLC2A6	solute carrier family 2 (facilitated glucose transporter), member 6
TC2200006540.hg.1	5.43	6.88	-2.75	0.027	USP18	ubiquitin specific peptidase 18
TC0400008628.hg.1	6.36	5.32	2.06	0.0271	SPRY1	sprouty RTK signaling antagonist 1
TC0X00009025.hg.1	9.11	7.64	2.76	0.0271	ANOS1	anosmin 1
TC0200016611.hg.1	8.91	10.8	-3.69	0.0271	GPR35	G protein-coupled receptor 35
TC0700013355.hg.1	5.38	4.28	2.14	0.0276	NME8	NME/NM23 family member 8
TC0200014597.hg.1	8.73	10.34	-3.05	0.0281	RND3	Rho family GTPase 3
TC0100008807.hg.1	6.17	4.63	2.9	0.0284	NEXN	nexilin (F actin binding protein)
TC0400011053.hg.1	5.31	9.45	-17.62	0.0284	CXCL10	chemokine (C-X-C motif) ligand 10
TC0200016502.hg.1	4.74	6.3	-2.95	0.0286	IL18R1	interleukin 18 receptor 1
TC1900011756.hg.1	10.36	11.4	-2.06	0.0289	PVR	poliovirus receptor
TC0200009060.hg.1	10.23	11.71	-2.78	0.0299	STEAP3	STEAP family member 3, metalloreductase
TC1700008668.hg.1	3.82	4.85	-2.05	0.03	PRKCA	Jeck2013 ALT_ACCEPTOR, ALT_DONOR, coding, INTERNAL, intronic best transcript NM_002737
TC1700006946.hg.1	8.05	10.53	-5.6	0.0302	HS3ST3B1	heparan sulfate (glucosamine) 3-O-sulfotransferase 3B1
TC1900009756.hg.1	3.47	4.5	-2.04	0.0304	SYCE2	synaptonemal complex central element protein 2
TC1000008193.hg.1	11.7	13.14	-2.72	0.0305	PPIF	peptidylprolyl isomerase F
TC1500007901.hg.1	8.68	7.66	2.03	0.0306	SNX33	sorting nexin 33
TC0500011896.hg.1	6.76	5.67	2.13	0.0307	ZNF608	zinc finger protein 608
TC0300008826.hg.1	3.96	4.99	-2.04	0.0307	NEK11	NIMA-related kinase 11
TC0100009221.hg.1	5.36	6.63	-2.41	0.0314	VCAM1	vascular cell adhesion molecule 1
TC1100010123.hg.1	5.28	3.99	2.44	0.0315	DKK3	dickkopf WNT signaling pathway inhibitor 3
TC1800007850.hg.1	14.58	13.57	2.01	0.0319	COLEC12	collectin sub-family member 12
TC0200010219.hg.1	9.17	8.11	2.08	0.032	FAM171B	family with sequence similarity 171, member B
TC0X00009637.hg.1	8.56	9.65	-2.13	0.0331	PIM2	Pim-2 proto-oncogene, serine/threonine kinase
TC1200009103.hg.1	12.59	11.57	2.03	0.0331	PRKAB1	protein kinase, AMP-activated, beta 1 non-catalytic subunit
TC0500013349.hg.1	6.42	5.23	2.28	0.0332	FBN2	fibrillin 2
TC2200008036.hg.1	5.12	6.5	-2.59	0.0336	USP41	ubiquitin specific peptidase 41
TC1100011901.hg.1	4.3	2.96	2.53	0.0339	NOX4	NADPH oxidase 4
TC0200009955.hg.1	12.25	10.82	2.69	0.0339	CYBRD1	cytochrome b reductase 1
TC1100012990.hg.1	4.98	3.82	2.23	0.0341	MIR670HG; HSD17B12	MIR670 host gene; hydroxysteroid (17-beta) dehydrogenase 12
TC0300014092.hg.1	9.79	12.27	-5.57	0.0346	TM4SF19-TCTEX1D2	TM4SF19-TCTEX1D2 readthrough (NMD candidate)
TC1800006915.hg.1	2.8	3.89	-2.14	0.0351	HRH4	histamine receptor H4
TC1000007976.hg.1	5.05	4	2.07	0.0367	CHST3	carbohydrate (chondroitin 6) sulfotransferase 3
TC0300011391.hg.1	5.73	3.96	3.41	0.0369	ADAMTS9	ADAM metallopeptidase with thrombospondin type 1 motif 9
TC1200008474.hg.1	6.29	4.73	2.96	0.0371	SOCS2	suppressor of cytokine signaling 2
TC0100011253.hg.1	11.97	13.09	-2.17	0.0373	BTG2	BTG family, member 2
TC1400006537.hg.1	8.54	7.49	2.07	0.0376	RNASE3	ribonuclease, RNase A family, 3
TC0700006977.hg.1	6.63	8.71	-4.22	0.0376	NFE2L3	nuclear factor, erythroid 2-like 3
TC1100011797.hg.1	7.07	5.95	2.17	0.0378	RAB30	RAB30, member RAS oncogene family
TC0200016511.hg.1	11.84	13.45	-3.05	0.0378	IL1RN	interleukin 1 receptor antagonist
TC1600007741.hg.1	3.22	4.65	-2.69	0.0379	PHKB	Transcript Identified by AceView, Entrez Gene ID(s) 5257
TC0700006735.hg.1	4.9	6.38	-2.79	0.0385	SCIN	scinderin
TC0200016115.hg.1	11.89	10.57	2.49	0.0387	ARL4C	ADP-ribosylation factor like GTPase 4C
TC0700008264.hg.1	4.39	5.43	-2.07	0.0388	DBF4	Transcript Identified by AceView, Entrez Gene ID(s) 10926
TC0200008501.hg.1	5.86	6.95	-2.13	0.0389	ITPRIPL1	inositol 1,4,5-trisphosphate receptor interacting protein-like 1
TC0200015002.hg.1	6.86	5.56	2.46	0.0394	CHN1	chimerin 1
TC0600011945.hg.1	6	4.51	2.81	0.0396	RCAN2	regulator of calcineurin 2
TC1700007560.hg.1	6.41	8.65	-4.72	0.0415	CCL8	chemokine (C-C motif) ligand 8
TC1200008921.hg.1	6.28	7.91	-3.09	0.0416	OAS2	2-5-oligoadenylate synthetase 2
TC0500012388.hg.1	7.95	6.34	3.05	0.042	DPYSL3	dihydropyrimidinase-like 3
TC2100007241.hg.1	10.36	7.71	6.27	0.042	ABCG1	ATP binding cassette subfamily G member 1
TC0800006927.hg.1	9.29	11.58	-4.89	0.0423	LPL	lipoprotein lipase
TC0500012497.hg.1	10.49	12.11	-3.07	0.0423	TNIP1	TNFAIP3 interacting protein 1
TC2100007451.hg.1	8.26	9.6	-2.54	0.0431	COL6A2	collagen, type VI, alpha 2
TC0300013336.hg.1	5.75	7.01	-2.41	0.0434	LAMP3	lysosomal-associated membrane protein 3
TC0700006890.hg.1	3.63	5.02	-2.62	0.044	IL6	interleukin 6
TC0400009258.hg.1	7.78	6.35	2.69	0.044	PALLD	palladin, cytoskeletal associated protein
TC1200010874.hg.1	11.92	13.32	-2.65	0.0441	MMP19	matrix metallopeptidase 19
TC0400008007.hg.1	8.66	9.84	-2.26	0.0446	GPAT3	glycerol-3-phosphate acyltransferase 3
TC0X00008235.hg.1	5.48	6.94	-2.74	0.045	LONRF3	LON peptidase N-terminal domain and ring finger 3
TC1200010022.hg.1	3.93	2.79	2.2	0.0453	MGP	matrix Gla protein
TC1100007818.hg.1	9.53	10.71	-2.26	0.0456	DAGLA	diacylglycerol lipase, alpha
TC1400008382.hg.1	10.53	11.97	-2.71	0.0456	TNFAIP2	tumor necrosis factor, alpha-induced protein 2
TC2000009275.hg.1	4.69	5.97	-2.42	0.0458	OCSTAMP	osteoclast stimulatory transmembrane protein
TC0100008815.hg.1	4.34	6.31	-3.94	0.0463	IFI44L	interferon-induced protein 44-like
TC1200012597.hg.1	8.25	9.31	-2.08	0.0469	MGST1	microsomal glutathione S-transferase 1
TC0100013182.hg.1	7.42	5.91	2.85	0.047	CAMK2N1	calcium/calmodulin-dependent protein kinase II inhibitor 1
TC0200009539.hg.1	9.11	7.94	2.25	0.0471	ARHGAP15	Rho GTPase activating protein 15
TC0100011382.hg.1	4.84	6.03	-2.28	0.0471	DYRK3	dual specificity tyrosine-(Y)-phosphorylation regulated kinase 3
TC1700009809.hg.1	7.27	9.09	-3.54	0.0472	HS3ST3A1	heparan sulfate (glucosamine) 3-O-sulfotransferase 3A1
TC2000006736.hg.1	5.75	3.56	4.57	0.0473	SPTLC3	serine palmitoyltransferase, long chain base subunit 3
TC0300014095.hg.1	10.6	12.96	-5.12	0.0473	TM4SF19	transmembrane 4 L six family member 19
TC0200007237.hg.1	10.87	12.15	-2.43	0.0474	CRIM1	cysteine rich transmembrane BMP regulator 1 (chordin-like)
TC0100016166.hg.1	5.78	3.08	6.5	0.0475	APOA2	apolipoprotein A-II
TC2000007519.hg.1	10.44	11.57	-2.19	0.0487	CD40	CD40 molecule, TNF receptor superfamily member 5
TC1300006817.hg.1	6.29	4.97	2.49	0.049	KL	klotho
TC1400010390.hg.1	5.87	6.93	-2.08	0.049	AHNAK2	AHNAK nucleoprotein 2
TC0900010591.hg.1	7.77	9.14	-2.6	0.0495	SLC28A3	solute carrier family 28 (concentrative nucleoside transporter), member 3
TC1100007801.hg.1	13.69	14.91	-2.34	0.0499	TMEM138	transmembrane protein 138
