# Supplementary material for: C5a Activates a Pro-Inflammatory Gene Expression Profile in Human Gaucher iPSC-Derived Macrophages
Source: Int J Mol Sci. 2021 Sep 14;22(18):9912. doi: 10.3390/ijms22189912 (PMC8466165; doi:10.3390/ijms22189912)
Supplement: Supplementary file 1 [file ijms-22-09912-s001.zip › Supplemental Table S3D.xlsx]

## Sheet: Sheet1
ClariomTM S Assay Transcript Cluster (TC) ID	unstimulated GD Avg (log2)	C5a stimulated GD Avg (log2)	Fold Change	P-val	Gene Symbol	Description
TC1400007706.hg.1	7.26	12.36	-34.15	9.88e-08	FOS	FBJ murine osteosarcoma viral oncogene homolog
TC1300009348.hg.1	6.39	9.8	-10.66	2.3e-07	SPRY2	sprouty RTK signaling antagonist 2
TC0500012567.hg.1	11.9	8.72	9.01	2.73e-07	FAXDC2	fatty acid hydroxylase domain containing 2
TC1700010393.hg.1	5.68	13.26	-190.9	3.17e-07	CCL1	chemokine (C-C motif) ligand 1
TC0300006483.hg.1	6.25	9.9	-12.51	7.85e-07	BHLHE40	basic helix-loop-helix family, member e40
TC0200015211.hg.1	14.51	9.94	23.77	7.86e-07	SLC40A1	solute carrier family 40 (iron-regulated transporter), member 1
TC0600007596.hg.1	4.76	9.87	-34.39	7.94e-07	TNF	tumor necrosis factor
TC0500012937.hg.1	7.22	10.27	-8.27	8.87e-07	NOP16	NOP16 nucleolar protein
TC0800009856.hg.1	4.13	9.66	-46.43	1.15e-06	EGR3	early growth response 3
TC0500008785.hg.1	5.83	13.53	-207.56	1.18e-06	EGR1	early growth response 1
TC0600006967.hg.1	6.88	10.21	-10.07	1.26e-06	EDN1	endothelin 1
TC0300013146.hg.1	11.77	8.28	11.19	1.31e-06	TNFSF10	tumor necrosis factor (ligand) superfamily, member 10
TC1200008165.hg.1	11.66	8.42	9.48	1.32e-06	KCNMB4	potassium channel subfamily M regulatory beta subunit 4
TC0700012230.hg.1	5.51	9.2	-12.88	1.41e-06	NRCAM	neuronal cell adhesion molecule
TC1000009296.hg.1	7.99	12.35	-20.52	1.7e-06	PTPRE	protein tyrosine phosphatase, receptor type, E
TC1300009271.hg.1	10.35	7.89	5.48	1.77e-06	TBC1D4	TBC1 domain family, member 4
TC0100015750.hg.1	8.51	6.06	5.47	2.22e-06	HORMAD1	HORMA domain containing 1
TC2100008030.hg.1	10.77	13.12	-5.12	2.38e-06	RCAN1	regulator of calcineurin 1
TC0200010502.hg.1	9.58	7.04	5.8	2.52e-06	FAM117B	family with sequence similarity 117, member B
TC0300008563.hg.1	12.81	10.69	4.35	2.78e-06	DIRC2	disrupted in renal carcinoma 2
TC1900007340.hg.1	11.15	13.4	-4.75	2.82e-06	MAP1S	microtubule-associated protein 1S
TC0400011535.hg.1	6.71	11.83	-34.93	3e-06	DKK2	dickkopf WNT signaling pathway inhibitor 2
TC0200010284.hg.1	6.66	9.75	-8.49	3.02e-06	MYO1B	myosin IB
TC1000011376.hg.1	3.67	7.92	-18.96	3.3e-06	CH25H	cholesterol 25-hydroxylase
TC1100008797.hg.1	10.19	12.25	-4.19	3.31e-06	PANX1	pannexin 1
TC0500012312.hg.1	4.07	7.46	-10.49	3.4e-06	SPRY4	sprouty RTK signaling antagonist 4
TC1100008236.hg.1	8.97	12.49	-11.46	3.46e-06	CCND1	cyclin D1
TC1900007853.hg.1	4.56	7.38	-7.03	3.57e-06	GPR42	G protein-coupled receptor 42 (gene/pseudogene)
TC1600011578.hg.1	7.33	9.93	-6.09	4.12e-06	FBXO31	F-box protein 31
TC2000008650.hg.1	4.31	6.54	-4.69	4.32e-06	THBD	thrombomodulin
TC0200008930.hg.1	8.76	13.26	-22.69	4.46e-06	SLC20A1	solute carrier family 20 (phosphate transporter), member 1
TC1000007876.hg.1	10.12	12.58	-5.5	5.46e-06	DDX21	DEAD (Asp-Glu-Ala-Asp) box helicase 21
TC0900010543.hg.1	5.83	8.6	-6.83	6.99e-06	TLE1	transducin-like enhancer of split 1 (E(sp1) homolog, Drosophila)
TC0300013932.hg.1	7.33	5.45	3.68	7.18e-06	SRGAP3	SLIT-ROBO Rho GTPase activating protein 3
TC1900006576.hg.1	6.59	10	-10.65	7.36e-06	DOT1L	DOT1-like histone H3K79 methyltransferase
TC0900010445.hg.1	11.78	9.51	4.84	7.36e-06	NMRK1	nicotinamide riboside kinase 1
TC0100011453.hg.1	7.2	9.26	-4.17	7.66e-06	G0S2	G0/G1 switch 2
TC1900011775.hg.1	8.52	11.15	-6.17	7.69e-06	GRWD1	glutamate-rich WD repeat containing 1
TC1400006521.hg.1	11.59	14.35	-6.75	8.03e-06	PNP	purine nucleoside phosphorylase
TC0300011152.hg.1	8.09	11.07	-7.85	8.77e-06	DUSP7	dual specificity phosphatase 7
TC1100013165.hg.1	13.27	15.25	-3.93	9.06e-06	SLC43A3	solute carrier family 43, member 3
TC1200011310.hg.1	8.95	13.25	-19.81	9.23e-06	PHLDA1	pleckstrin homology-like domain, family A, member 1
TC0400010418.hg.1	13.41	11.49	3.77	9.79e-06	RELL1	RELT-like 1
TC0300012007.hg.1	10.15	7.91	4.72	9.87e-06	CD200R1	CD200 receptor 1
TC1700010461.hg.1	6.75	12.17	-42.85	1.01e-05	CCL3L3; CCL3L1	chemokine (C-C motif) ligand 3-like 3; chemokine (C-C motif) ligand 3-like 1
TC0200012404.hg.1	15	13.16	3.59	1.01e-05	ZFP36L2	ZFP36 ring finger protein-like 2
TC0400011395.hg.1	11.15	12.95	-3.47	1.03e-05	EIF4E	eukaryotic translation initiation factor 4E
TC0200013916.hg.1	9.47	15.89	-85.43	1.04e-05	IL1B	interleukin 1 beta
TC1200011786.hg.1	7.01	9.73	-6.62	1.05e-05	NUAK1	NUAK family, SNF1-like kinase, 1
TC0700013354.hg.1	12.74	9.92	7.08	1.06e-05	GPR141	G protein-coupled receptor 141
TC0100016006.hg.1	8.95	11.57	-6.14	1.06e-05	GPATCH4	G-patch domain containing 4
TC0100016427.hg.1	3.01	6.7	-12.92	1.07e-05	TNFSF18	tumor necrosis factor (ligand) superfamily, member 18
TC2200009356.hg.1	9.14	10.97	-3.54	1.07e-05	ARFGAP3	ADP-ribosylation factor GTPase activating protein 3
TC1000011501.hg.1	10.52	12.36	-3.57	1.12e-05	TCTN3	tectonic family member 3
TC1200010837.hg.1	7.56	10.91	-10.21	1.12e-05	GPR84	G protein-coupled receptor 84
TC1900008329.hg.1	11.54	13.72	-4.54	1.12e-05	VASP	vasodilator-stimulated phosphoprotein
TC0300012815.hg.1	9.4	7.57	3.55	1.13e-05	P2RY13	purinergic receptor P2Y, G-protein coupled, 13
TC1900009310.hg.1	5.79	10.94	-35.67	1.14e-05	MATK	megakaryocyte-associated tyrosine kinase
TC1000009092.hg.1	12.43	9.6	7.08	1.21e-05	INPP5F	inositol polyphosphate-5-phosphatase F
TC1000011749.hg.1	7.97	10.57	-6.07	1.23e-05	ITPRIP	inositol 1,4,5-trisphosphate receptor interacting protein
TC0300007237.hg.1	8.46	10.17	-3.27	1.36e-05	LIMD1	LIM domains containing 1
TC0700009675.hg.1	10.62	8.19	5.39	1.38e-05	GIMAP8	GTPase, IMAP family member 8
TC1200012606.hg.1	12.66	10.92	3.35	1.5e-05	LRMP	lymphoid-restricted membrane protein
TC1500009403.hg.1	8.72	11.93	-9.25	1.5e-05	TNFAIP8L3	tumor necrosis factor, alpha-induced protein 8-like 3
TC1200009800.hg.1	11.17	13.63	-5.52	1.52e-05	SLC2A3	solute carrier family 2 (facilitated glucose transporter), member 3
TC2000007083.hg.1	7.46	10.64	-9.07	1.53e-05	ID1	inhibitor of DNA binding 1, dominant negative helix-loop-helix protein
TC1500007633.hg.1	5.6	9.06	-11.01	1.58e-05	SMAD3	SMAD family member 3
TC1900007127.hg.1	7.78	10.87	-8.53	1.67e-05	IER2	immediate early response 2
TC0800008845.hg.1	6.63	11.13	-22.66	1.72e-05	MYC	v-myc avian myelocytomatosis viral oncogene homolog
TC1100013201.hg.1	5.83	7.49	-3.17	1.73e-05	ORAOV1	oral cancer overexpressed 1
TC1900010864.hg.1	7.58	10.54	-7.81	1.87e-05	KCNN4	potassium channel, calcium activated intermediate/small conductance subfamily N alpha, member 4
TC1400009194.hg.1	9.42	11.4	-3.96	1.89e-05	FERMT2	fermitin family member 2
TC0800007245.hg.1	8.72	10.62	-3.74	2.02e-05	MAK16	MAK16 homolog
TC2200007891.hg.1	4.47	7.48	-8.03	2.17e-05	CECR6	cat eye syndrome chromosome region, candidate 6
TC1700007557.hg.1	9.86	15.11	-38.12	2.18e-05	CCL2	chemokine (C-C motif) ligand 2
TC1700009293.hg.1	7.78	12.15	-20.65	2.44e-05	METRNL	meteorin, glial cell differentiation regulator-like
TC1600009580.hg.1	10.01	12.17	-4.45	2.58e-05	XYLT1	xylosyltransferase I
TC0200016424.hg.1	11.39	14.61	-9.28	2.67e-05	LBH	limb bud and heart development
TC2100008555.hg.1	10.34	8.63	3.28	2.68e-05	TIAM1	T-cell lymphoma invasion and metastasis 1
TC0500011702.hg.1	8.81	10.68	-3.66	2.71e-05	STARD4	StAR-related lipid transfer domain containing 4
TC2200006501.hg.1	11.96	13.78	-3.52	2.78e-05	IL17RA	interleukin 17 receptor A
TC0100013315.hg.1	6.72	9.26	-5.82	2.8e-05	IFNLR1	interferon, lambda receptor 1
TC1000012117.hg.1	10.71	12.51	-3.48	2.83e-05	CHST15	carbohydrate (N-acetylgalactosamine 4-sulfate 6-O) sulfotransferase 15
TC1200009796.hg.1	12	14.36	-5.13	2.91e-05	SLC2A14	solute carrier family 2 (facilitated glucose transporter), member 14
TC0600012875.hg.1	8.78	11.05	-4.83	2.97e-05	FYN	FYN proto-oncogene, Src family tyrosine kinase
TC1900008881.hg.1	4.94	8.37	-10.8	3.06e-05	FCAR	Fc fragment of IgA receptor
TC1300010037.hg.1	6.58	8.67	-4.27	3.15e-05	KIAA0226L	KIAA0226-like
TC1900011382.hg.1	7.41	11.47	-16.64	3.25e-05	MYADM	Memczak2013 ANTISENSE, CDS, coding, INTERNAL best transcript NM_001020819
TC0100008564.hg.1	11.57	9.95	3.07	3.29e-05	ATG4C	autophagy related 4C, cysteine peptidase
TC0600008697.hg.1	7.32	10.07	-6.75	3.32e-05	NT5E	5-nucleotidase, ecto (CD73)
TC0400012818.hg.1	13.08	11.44	3.12	3.36e-05	CCNG2	cyclin G2
TC0400009856.hg.1	7.92	9.58	-3.16	3.39e-05	LYAR	Ly1 antibody reactive
TC0600009744.hg.1	11.78	9.96	3.52	3.46e-05	RAB32	RAB32, member RAS oncogene family
TC0700011561.hg.1	8.46	11.78	-9.94	3.57e-05	CCL24	chemokine (C-C motif) ligand 24
TC0800012474.hg.1	8.71	10.66	-3.86	3.63e-05	AGO2	argonaute RISC catalytic component 2
TC1700007204.hg.1	11.24	9.48	3.4	3.7e-05	SPECC1	sperm antigen with calponin homology and coiled-coil domains 1
TC1100011259.hg.1	4.52	6.13	-3.06	3.71e-05	FOSL1	FOS-like antigen 1
TC1200012254.hg.1	6.07	8.13	-4.18	3.8e-05	VPS37B	vacuolar protein sorting 37 homolog B (S. cerevisiae)
TC1900007852.hg.1	4.83	7.67	-7.15	3.86e-05	FFAR3	free fatty acid receptor 3
TC0400010609.hg.1	7.42	5.91	2.86	3.88e-05	CORIN	corin, serine peptidase
TC1100012984.hg.1	8.45	10.06	-3.06	4.03e-05	NAT10	N-acetyltransferase 10 (GCN5-related)
TC0100016631.hg.1	5.93	10.53	-24.24	4.04e-05	RGS16	regulator of G-protein signaling 16
TC0600009831.hg.1	3.69	5.53	-3.58	4.1e-05	PPP1R14C	protein phosphatase 1, regulatory (inhibitor) subunit 14C
TC1000010593.hg.1	9.44	7.75	3.23	4.1e-05	C10orf128	chromosome 10 open reading frame 128
TC2000008815.hg.1	7.59	9.15	-2.95	4.19e-05	BCL2L1	BCL2-like 1
TC1200007153.hg.1	8.23	10.28	-4.14	4.22e-05	PPFIBP1	PTPRF interacting protein, binding protein 1 (liprin beta 1)
TC1900007859.hg.1	6.57	10.52	-15.44	4.24e-05	FFAR2	free fatty acid receptor 2
TC0600012628.hg.1	8.69	10.23	-2.9	4.29e-05	NDUFAF4	NADH dehydrogenase (ubiquinone) complex I, assembly factor 4
TC0700006634.hg.1	7.96	9.98	-4.06	4.47e-05	AIMP2	aminoacyl tRNA synthetase complex-interacting multifunctional protein 2
TC1700007677.hg.1	5.88	7.97	-4.23	4.47e-05	DUSP14	dual specificity phosphatase 14
TC1500010655.hg.1	9.79	12.3	-5.66	4.55e-05	CHSY1	chondroitin sulfate synthase 1
TC0700009677.hg.1	11.64	9.12	5.74	4.62e-05	GIMAP4	GTPase, IMAP family member 4
TC0200007111.hg.1	8.51	10.61	-4.28	4.71e-05	WDR43; SNORD53	WD repeat domain 43; small nucleolar RNA, C/D box 53
TC1300008487.hg.1	8.12	10.39	-4.81	4.73e-05	SLC7A1	solute carrier family 7 (cationic amino acid transporter, y+ system), member 1
TC1500006788.hg.1	6.22	8.02	-3.5	4.75e-05	GREM1	gremlin 1, DAN family BMP antagonist
TC0600010810.hg.1	6.06	8.54	-5.59	4.75e-05	NEDD9	neural precursor cell expressed, developmentally down-regulated 9
TC1100008999.hg.1	7.95	11.41	-11.01	4.81e-05	ZC3H12C	zinc finger CCCH-type containing 12C
TC1000010737.hg.1	9.39	7.61	3.44	5.44e-05	RHOBTB1	Rho-related BTB domain containing 1
TC0X00008836.hg.1	5.47	6.98	-2.84	5.46e-05	PLXNA3	plexin A3
TC1900007436.hg.1	9.8	11.14	-2.53	5.6e-05	GATAD2A; MIR640	GATA zinc finger domain containing 2A; microRNA 640
TC1100011022.hg.1	8.06	9.82	-3.39	5.62e-05	VPS37C	vacuolar protein sorting 37 homolog C (S. cerevisiae)
TC1500009561.hg.1	5.88	7.92	-4.12	5.66e-05	ALDH1A2	aldehyde dehydrogenase 1 family, member A2
TC0600008073.hg.1	6.96	8.53	-2.97	5.8e-05	SRF	serum response factor
TC0100017445.hg.1	10.84	8.78	4.18	5.82e-05	TLR5	toll-like receptor 5
TC1300008468.hg.1	9.84	7.45	5.27	5.97e-05	SLC46A3	solute carrier family 46, member 3
TC1700012382.hg.1	8.66	5.31	10.22	6.01e-05	OMG	oligodendrocyte myelin glycoprotein
TC0400011299.hg.1	10.19	7.99	4.6	6.01e-05	FAM13A	family with sequence similarity 13, member A
TC0100013581.hg.1	5.98	8.65	-6.34	6.19e-05	SPOCD1	SPOC domain containing 1
TC1900008292.hg.1	8.78	10.64	-3.63	6.21e-05	TOMM40	translocase of outer mitochondrial membrane 40 homolog (yeast)
TC1000010768.hg.1	6.5	13.55	-132.43	6.28e-05	EGR2	early growth response 2
TC0400012938.hg.1	8.83	11.95	-8.71	6.28e-05	RASGEF1B	RasGEF domain family member 1B
TC0300013123.hg.1	11.24	9.73	2.85	6.38e-05	PLD1	phospholipase D1, phosphatidylcholine-specific
TC1300007187.hg.1	9.33	10.75	-2.68	6.45e-05	TRIM13; KCNRG	tripartite motif containing 13; potassium channel regulator
TC1200006909.hg.1	13.35	15.77	-5.34	6.61e-05	EMP1	epithelial membrane protein 1
TC0600009059.hg.1	12.02	10.63	2.62	6.73e-05	FOXO3	forkhead box O3
TC0300013920.hg.1	6.98	9.51	-5.77	6.76e-05	NRROS	negative regulator of reactive oxygen species
TC1200010702.hg.1	8.69	10	-2.49	7.05e-05	SMAGP	small cell adhesion glycoprotein
TC0100008637.hg.1	10.75	12.59	-3.59	7.1e-05	TCTEX1D1	Tctex1 domain containing 1
TC0100010231.hg.1	8.21	9.76	-2.94	7.39e-05	CD1E	CD1e molecule
TC0800008126.hg.1	8.39	10.94	-5.85	7.52e-05	CA2	carbonic anhydrase II
TC0800010938.hg.1	3.95	6.64	-6.47	7.69e-05	FABP4	fatty acid binding protein 4, adipocyte
TC0100011384.hg.1	11.05	12.52	-2.78	7.72e-05	MAPKAPK2	mitogen-activated protein kinase-activated protein kinase 2
TC0300010413.hg.1	8.52	11.08	-5.92	7.72e-05	ANKRD28	ankyrin repeat domain 28
TC0100006494.hg.1	7.41	8.72	-2.48	7.82e-05	B3GALT6	UDP-Gal:betaGal beta 1,3-galactosyltransferase 6
TC0200012863.hg.1	8.4	10.92	-5.74	7.9e-05	SPRED2	sprouty-related, EVH1 domain containing 2
TC0400008175.hg.1	12.41	13.84	-2.7	7.98e-05	PDLIM5	PDZ and LIM domain 5
TC0600014220.hg.1	12.19	14	-3.5	8e-05	SERPINB9	serpin peptidase inhibitor, clade B (ovalbumin), member 9
TC1900008824.hg.1	12.1	14.92	-7.08	8.02e-05	MYADM	myeloid-associated differentiation marker
TC0700008023.hg.1	9.84	8.13	3.28	8.02e-05	GATSL2	GATS protein-like 2
TC0900009592.hg.1	11.96	10.46	2.84	8.09e-05	PSIP1	PC4 and SFRS1 interacting protein 1
TC1500008339.hg.1	9.14	7.76	2.6	8.51e-05	FES	FES proto-oncogene, tyrosine kinase
TC1600007193.hg.1	6.32	8.27	-3.88	8.55e-05	POLR3E	polymerase (RNA) III (DNA directed) polypeptide E (80kD)
TC0900011379.hg.1	10.65	8.65	4.01	8.58e-05	MEGF9	multiple EGF-like-domains 9
TC2000009058.hg.1	7.49	9.68	-4.56	8.59e-05	TGM2	transglutaminase 2
TC1400008460.hg.1	5.63	3.94	3.23	8.61e-05	PLD4	phospholipase D family, member 4
TC1400009980.hg.1	7.33	9.05	-3.28	8.72e-05	CCDC88C	coiled-coil domain containing 88C
TC1700012274.hg.1	6.48	8.78	-4.93	8.75e-05	ITGB3	integrin beta 3
TC0100009558.hg.1	12.02	10.74	2.43	8.93e-05	PTGFRN	prostaglandin F2 receptor inhibitor
TC1000010622.hg.1	12.76	11.27	2.81	9.08e-05	SGMS1	sphingomyelin synthase 1
TC0100015265.hg.1	8.04	9.5	-2.77	9.26e-05	DENND2D	DENN/MADD domain containing 2D
TC0200015601.hg.1	8.54	6.68	3.63	9.3e-05	KANSL1L	KAT8 regulatory NSL complex subunit 1 like
TC1700007636.hg.1	7.03	8.52	-2.83	9.5e-05	PIGW	phosphatidylinositol glycan anchor biosynthesis class W
TC0300010714.hg.1	8.03	5.95	4.23	9.59e-05	TRANK1	tetratricopeptide repeat and ankyrin repeat containing 1
TC1000007761.hg.1	12.59	14.72	-4.37	9.63e-05	ARID5B	AT rich interactive domain 5B (MRF1-like)
TC0800012405.hg.1	10.05	8.58	2.77	9.7e-05	FUT10	fucosyltransferase 10 (alpha (1,3) fucosyltransferase)
TC0100008517.hg.1	6.61	3.58	8.17	9.71e-05	NFIA	nuclear factor I/A
TC1100009309.hg.1	8.24	6.73	2.84	9.86e-05	SORL1	sortilin-related receptor, L(DLR class) A repeats containing
TC0900010773.hg.1	7.9	4.76	8.78	9.91e-05	ROR2	receptor tyrosine kinase-like orphan receptor 2
TC1400009973.hg.1	7.94	5.66	4.85	9.94e-05	RPS6KA5	ribosomal protein S6 kinase, 90kDa, polypeptide 5
TC2100007402.hg.1	9.73	12.75	-8.15	9.98e-05	ADARB1	adenosine deaminase, RNA-specific, B1
TC1900010856.hg.1	11.38	14.62	-9.47	0.0001	PLAUR	plasminogen activator, urokinase receptor
TC0200014991.hg.1	10.6	7.92	6.42	0.0001	GPR155	G protein-coupled receptor 155
TC0200011624.hg.1	10.07	7.66	5.3	0.0001	CMPK2	cytidine monophosphate (UMP-CMP) kinase 2, mitochondrial
TC0600009870.hg.1	9.23	7.78	2.73	0.0001	CCDC170	coiled-coil domain containing 170
TC0100009364.hg.1	6.11	11.16	-33.16	0.0001	CSF1	colony stimulating factor 1 (macrophage)
TC0100010510.hg.1	10.04	8.42	3.09	0.0001	RCSD1	RCSD domain containing 1
TC0300013914.hg.1	5.38	7.06	-3.21	0.0001	TPRG1	tumor protein p63 regulated 1
TC0400007264.hg.1	12.07	13.31	-2.36	0.0001	KLF3	Kruppel-like factor 3 (basic)
TC0100011533.hg.1	6.46	11.04	-23.92	0.0001	ATF3	activating transcription factor 3
TC0500012162.hg.1	12.4	11.1	2.46	0.0001	BRD8	bromodomain containing 8
TC0100006773.hg.1	6.66	8.5	-3.6	0.0001	SPSB1	splA/ryanodine receptor domain and SOCS box containing 1
TC0300010082.hg.1	6.99	8.34	-2.55	0.0001	FAM157A	family with sequence similarity 157, member A
TC1900010375.hg.1	7.49	5.91	2.99	0.0001	RHPN2	rhophilin, Rho GTPase binding protein 2
TC1500010871.hg.1	11.04	9.69	2.54	0.0001	ZNF280D	zinc finger protein 280D
TC0400008902.hg.1	10.85	12.44	-3.01	0.0001	ABCE1	ATP binding cassette subfamily E member 1
TC1300009505.hg.1	11.37	9.95	2.68	0.0001	ABCC4	ATP binding cassette subfamily C member 4
TC1100009330.hg.1	11.26	13.79	-5.77	0.0001	UBASH3B	ubiquitin associated and SH3 domain containing B
TC1700007620.hg.1	4.22	11.85	-198.52	0.0001	CCL4L2; CCL4; CCL4L1	chemokine (C-C motif) ligand 4-like 2; chemokine (C-C motif) ligand 4; chemokine (C-C motif) ligand 4-like 1
TC1700010459.hg.1	7.22	14.78	-188.57	0.0001	CCL3	chemokine (C-C motif) ligand 3
TC1500010613.hg.1	10.14	8.76	2.6	0.0001	TTC23	tetratricopeptide repeat domain 23
TC1400009190.hg.1	10.63	12.19	-2.94	0.0001	GNPNAT1	glucosamine-phosphate N-acetyltransferase 1
TC0800008801.hg.1	11.53	13.25	-3.3	0.0001	TRIB1	tribbles pseudokinase 1
TC1100011614.hg.1	11.21	9.59	3.07	0.0001	KCNE3	potassium channel, voltage gated subfamily E regulatory beta subunit 3
TC1300009597.hg.1	7.55	6.22	2.51	0.0001	GPR18	G protein-coupled receptor 18
TC0100013651.hg.1	8.91	10.7	-3.46	0.0001	PHC2; MIR3605	polyhomeotic homolog 2 (Drosophila); microRNA 3605
TC0800010138.hg.1	9.96	8.54	2.69	0.0001	RAB11FIP1	RAB11 family interacting protein 1 (class I)
TC0500013153.hg.1	10.06	11.47	-2.66	0.0001	MTRR	5-methyltetrahydrofolate-homocysteine methyltransferase reductase
TC0700008292.hg.1	6.03	7.28	-2.39	0.0001	STEAP1	six transmembrane epithelial antigen of the prostate 1
TC0800010749.hg.1	10.64	9.2	2.71	0.0001	NCOA2	nuclear receptor coactivator 2
TC1000010744.hg.1	9.85	8.16	3.23	0.0001	TMEM26	transmembrane protein 26
TC0800009745.hg.1	8.17	6.6	2.97	0.0001	FGL1	fibrinogen like 1
TC1000011368.hg.1	5.63	7.88	-4.77	0.0001	ANKRD22	ankyrin repeat domain 22
TC0300008242.hg.1	12.6	13.8	-2.3	0.0001	ALCAM	activated leukocyte cell adhesion molecule
TC0800011150.hg.1	11.02	9.16	3.63	0.0001	TP53INP1	tumor protein p53 inducible nuclear protein 1
TC0500012238.hg.1	7.25	10.97	-13.18	0.0001	HBEGF	heparin-binding EGF-like growth factor
TC0900011582.hg.1	11.32	12.98	-3.17	0.0001	FAM129B	family with sequence similarity 129, member B
TC1200006779.hg.1	9.25	7.66	3	0.0001	CLEC12A	C-type lectin domain family 12, member A
TC1400009066.hg.1	10.36	8.8	2.94	0.0001	MIS18BP1	MIS18 binding protein 1
TC1700011704.hg.1	8.45	10.2	-3.35	0.0001	CD300E	CD300e molecule
TC1700012353.hg.1	6.19	7.65	-2.75	0.0001	PER1; MIR6883	period circadian clock 1; microRNA 6883
TC1200010556.hg.1	8.32	9.65	-2.51	0.0001	HDAC7	histone deacetylase 7
TC0900006762.hg.1	7.04	5.58	2.74	0.0001	ACER2	alkaline ceramidase 2
TC1400007860.hg.1	6.28	8.27	-3.97	0.0001	FLRT2	fibronectin leucine rich transmembrane protein 2
TC1500010184.hg.1	7.35	11.95	-24.36	0.0002	BCL2A1	BCL2-related protein A1
TC0900009861.hg.1	7.45	9.26	-3.5	0.0002	NOL6	nucleolar protein 6 (RNA-associated)
TC0600008095.hg.1	8.93	10.42	-2.81	0.0002	POLR1C	polymerase (RNA) I polypeptide C
TC0500012842.hg.1	8.62	11.86	-9.41	0.0002	DUSP1	dual specificity phosphatase 1
TC0800012313.hg.1	10.71	9.35	2.56	0.0002	SGK3; C8orf44-SGK3	serum/glucocorticoid regulated kinase family, member 3; C8orf44-SGK3 readthrough
TC1000008767.hg.1	11.87	13.64	-3.42	0.0002	INA	internexin neuronal intermediate filament protein, alpha
TC1000008904.hg.1	13.04	11.29	3.37	0.0002	PDCD4; MIR4680	programmed cell death 4 (neoplastic transformation inhibitor); microRNA 4680
TC0300009004.hg.1	7.28	8.77	-2.81	0.0002	RASA2	RAS p21 protein activator 2
TC0300008705.hg.1	9.33	7.86	2.77	0.0002	ABTB1	ankyrin repeat and BTB (POZ) domain containing 1
TC0500006816.hg.1	13.46	12.2	2.4	0.0002	FAM105A	family with sequence similarity 105, member A
TC0300013913.hg.1	7.18	10.06	-7.39	0.0002	TPRG1	tumor protein p63 regulated 1
TC0700009083.hg.1	9.64	8.43	2.31	0.0002	AHCYL2	adenosylhomocysteinase-like 2
TC0100013076.hg.1	8.8	4.96	14.26	0.0002	PADI2	peptidyl arginine deiminase, type II
TC1900011084.hg.1	9.95	8.51	2.71	0.0002	DBP	D site of albumin promoter (albumin D-box) binding protein
TC0400008093.hg.1	8.8	10.37	-2.97	0.0002	PKD2	polycystic kidney disease 2 (autosomal dominant)
TC0100011012.hg.1	8.63	12.63	-16	0.0002	RGS1	regulator of G-protein signaling 1
TC1200009300.hg.1	12.1	10.83	2.41	0.0002	BRI3BP	BRI3 binding protein
TC0600014189.hg.1	8.53	10.32	-3.46	0.0002	LTV1	LTV1 ribosome biogenesis factor
TC0100014040.hg.1	8.3	6.49	3.51	0.0002	PIK3R3	phosphoinositide-3-kinase, regulatory subunit 3 (gamma)
TC0800007027.hg.1	6.3	8.15	-3.61	0.0002	SLC25A37	solute carrier family 25 (mitochondrial iron transporter), member 37
TC0300009131.hg.1	13.06	11.76	2.46	0.0002	HPS3	Hermansky-Pudlak syndrome 3
TC1000007954.hg.1	11.2	9.56	3.1	0.0002	SLC29A3	solute carrier family 29 (equilibrative nucleoside transporter), member 3
TC1900011863.hg.1	8	9.37	-2.59	0.0002	FDX1L	ferredoxin 1-like
TC1900006522.hg.1	11.1	12.7	-3.02	0.0002	MIDN	midnolin
TC0400011283.hg.1	8.76	7.51	2.38	0.0002	PPM1K	protein phosphatase, Mg2+/Mn2+ dependent, 1K
TC1100008480.hg.1	10.38	8.93	2.75	0.0002	UVRAG	UV radiation resistance associated
TC0300010913.hg.1	9.06	10.95	-3.7	0.0002	CDCP1	CUB domain containing protein 1
TC1500007822.hg.1	9.78	12.66	-7.35	0.0002	CD276	CD276 molecule
TC1400010617.hg.1	7.81	11.28	-11.06	0.0002	PRKCH	protein kinase C, eta
TC0800011249.hg.1	8.87	10.66	-3.46	0.0002	RNF19A	ring finger protein 19A, RBR E3 ubiquitin protein ligase
TC0700012377.hg.1	11.55	9.91	3.12	0.0002	CTTNBP2	cortactin binding protein 2
TC0100013756.hg.1	6.9	8.19	-2.44	0.0002	YRDC	yrdC N(6)-threonylcarbamoyltransferase domain containing
TC0700011982.hg.1	9.6	7.68	3.79	0.0002	GATS	GATS, stromal antigen 3 opposite strand
TC0400012378.hg.1	8.11	9.78	-3.18	0.0002	SH3RF1	SH3 domain containing ring finger 1
TC1500010925.hg.1	10.1	8.77	2.5	0.0002	ARPIN	actin-related protein 2/3 complex inhibitor
TC1900010009.hg.1	7.84	10.45	-6.1	0.0002	JUND	jun D proto-oncogene
TC0600011903.hg.1	7.43	9.73	-4.93	0.0002	MRPL14	mitochondrial ribosomal protein L14
TC0900007064.hg.1	9.61	11.57	-3.88	0.0002	DNAJB5	DnaJ (Hsp40) homolog, subfamily B, member 5
TC1500007554.hg.1	11.3	10.07	2.34	0.0002	ZNF609	zinc finger protein 609
TC0100007160.hg.1	6.69	8.06	-2.58	0.0002	MRTO4	MRT4 homolog, ribosome maturation factor
TC1200011470.hg.1	10.9	13.65	-6.75	0.0002	DUSP6	dual specificity phosphatase 6
TC0200013595.hg.1	13.47	11.85	3.08	0.0002	MGAT4A	mannosyl (alpha-1,3-)-glycoprotein beta-1,4-N-acetylglucosaminyltransferase, isozyme A
TC1100007216.hg.1	10.37	8.45	3.76	0.0002	PRRG4	proline rich Gla (G-carboxyglutamic acid) 4 (transmembrane)
TC1500009597.hg.1	11.9	13.72	-3.54	0.0002	MYO1E	myosin IE
TC1900009838.hg.1	10.09	11.5	-2.66	0.0002	ADGRE2	adhesion G protein-coupled receptor E2
TC1000009104.hg.1	6.93	9.68	-6.73	0.0002	PLPP4	phospholipid phosphatase 4
TC0200016511.hg.1	11.25	15.44	-18.28	0.0002	IL1RN	interleukin 1 receptor antagonist
TC0600012542.hg.1	12.21	14.21	-3.99	0.0002	UBE2J1	ubiquitin-conjugating enzyme E2, J1
TC1000011382.hg.1	8.84	7.04	3.48	0.0002	PANK1	pantothenate kinase 1
TC0200007535.hg.1	9.57	7.95	3.08	0.0002	PPP1R21	protein phosphatase 1, regulatory subunit 21
TC0600014318.hg.1	10.69	9.07	3.08	0.0002	FAM46A	family with sequence similarity 46, member A
TC0600009439.hg.1	5.57	8.85	-9.67	0.0002	TMEM200A	transmembrane protein 200A
TC0100017083.hg.1	12.21	16.12	-14.95	0.0002	RAB7B	RAB7B, member RAS oncogene family
TSUnmapped00000053.hg.1	6.67	7.94	-2.41	0.0002	RPL7A	ribosomal protein L7a
TC0900009424.hg.1	4.29	6.48	-4.57	0.0002	GLIS3	GLIS family zinc finger 3
TC1200012707.hg.1	12.59	10.85	3.33	0.0002	ALDH2	aldehyde dehydrogenase 2 family (mitochondrial)
TC0500009488.hg.1	11.54	9.83	3.28	0.0002	CREBRF	CREB3 regulatory factor
TC1500010754.hg.1	11.91	13.12	-2.31	0.0002	PLEKHO2	pleckstrin homology domain containing, family O member 2
TC0600009228.hg.1	10.41	8.92	2.82	0.0002	NT5DC1	5-nucleotidase domain containing 1
TC1400007584.hg.1	8.15	6.74	2.66	0.0002	TTC9	tetratricopeptide repeat domain 9
TC0100006781.hg.1	5.72	7.45	-3.31	0.0002	SLC25A33	solute carrier family 25 (pyrimidine nucleotide carrier), member 33
TC0100016945.hg.1	5.84	8.93	-8.49	0.0002	PTPN7	protein tyrosine phosphatase, non-receptor type 7
TC0800012312.hg.1	10.53	9.33	2.3	0.0002	SGK3	serum/glucocorticoid regulated kinase family, member 3
TC0900008839.hg.1	4.94	7.03	-4.28	0.0002	SLC25A25	solute carrier family 25 (mitochondrial carrier; phosphate carrier), member 25
TC1300006979.hg.1	9.15	13.21	-16.76	0.0002	RGCC	regulator of cell cycle
TC0300007606.hg.1	9.12	10.31	-2.28	0.0002	ABHD6	abhydrolase domain containing 6
TC1800006748.hg.1	8.99	10.57	-2.99	0.0002	SEH1L	SEH1-like nucleoporin
TC0700009977.hg.1	5.68	10.74	-33.34	0.0002	PDGFA	platelet-derived growth factor alpha polypeptide
TC0300014093.hg.1	11.49	12.73	-2.36	0.0002	PCYT1A	phosphate cytidylyltransferase 1, choline, alpha
TC0300008482.hg.1	7.21	8.81	-3.03	0.0003	ADPRH	ADP-ribosylarginine hydrolase
TC0800006980.hg.1	6.13	9.04	-7.51	0.0003	SLC39A14	solute carrier family 39 (zinc transporter), member 14
TC0X00011382.hg.1	11.59	12.8	-2.31	0.0003	ACSL4	acyl-CoA synthetase long-chain family member 4
TC1300010029.hg.1	7.23	5.64	3.01	0.0003	N4BP2L1	NEDD4 binding protein 2-like 1
TC0400010449.hg.1	6.9	5.13	3.39	0.0003	TLR10	toll-like receptor 10
TC2200009283.hg.1	8.28	9.51	-2.35	0.0003	PRR5	proline rich 5 (renal)
TC0100008033.hg.1	9.96	8.6	2.57	0.0003	ERMAP	erythroblast membrane-associated protein (Scianna blood group)
TC0X00007378.hg.1	6.69	5.49	2.3	0.0003	MAGEH1	MAGE family member H1
TC0X00006704.hg.1	7.84	6.73	2.15	0.0003	REPS2	RALBP1 associated Eps domain containing 2
TC2200007150.hg.1	8.18	12.49	-19.83	0.0003	TIMP3	TIMP metallopeptidase inhibitor 3
TC0700013502.hg.1	11.34	12.74	-2.64	0.0003	SNX8; MIR6836	sorting nexin 8; microRNA 6836
TC1700007408.hg.1	9.34	7.6	3.34	0.0003	PIPOX	pipecolic acid oxidase
TC0100011695.hg.1	14.22	13.12	2.14	0.0003	BROX	BRO1 domain and CAAX motif containing
TC0800009673.hg.1	5.26	8.18	-7.53	0.0003	LONRF1	LON peptidase N-terminal domain and ring finger 1
TC0100016625.hg.1	16.58	15.42	2.24	0.0003	GLUL	glutamate-ammonia ligase
TC0600012061.hg.1	9.88	8.3	2.98	0.0003	ICK	intestinal cell (MAK-like) kinase
TC0100007505.hg.1	11.81	10.69	2.16	0.0003	WDTC1	WD and tetratricopeptide repeats 1
TC1600007112.hg.1	9.14	8	2.2	0.0003	CCP110	centriolar coiled coil protein 110kDa
TC0900009404.hg.1	7.11	8.56	-2.73	0.0003	PUM3	pumilio RNA binding family member 3
TC1200011961.hg.1	8.62	7.2	2.67	0.0003	TMEM116	transmembrane protein 116
TC1100012471.hg.1	11.49	9.62	3.64	0.0003	AMICA1	adhesion molecule, interacts with CXADR antigen 1
TC0700009233.hg.1	4.65	5.99	-2.52	0.0003	BPGM	Transcript Identified by AceView, Entrez Gene ID(s) 669
TC1900009116.hg.1	7.39	8.48	-2.13	0.0003	R3HDM4	R3H domain containing 4
TC1000008665.hg.1	5.8	6.91	-2.16	0.0003	C10orf2	chromosome 10 open reading frame 2
TC1100012019.hg.1	8.58	6.27	4.96	0.0003	SESN3	sestrin 3
TC0600008253.hg.1	9.75	7.56	4.58	0.0003	PAQR8	progestin and adipoQ receptor family member VIII
TC0400010618.hg.1	10.29	9.07	2.34	0.0003	TEC	tec protein tyrosine kinase
TC0200011837.hg.1	13.73	12.55	2.27	0.0003	FAM49A	family with sequence similarity 49, member A
TC0500007491.hg.1	13.06	10.48	5.98	0.0003	GAPT	GRB2-binding adaptor protein, transmembrane
TC1200009994.hg.1	4.44	3.09	2.55	0.0003	LINC01559	long intergenic non-protein coding RNA 1559
TC0600009534.hg.1	6.63	4.34	4.9	0.0003	MYB	v-myb avian myeloblastosis viral oncogene homolog
TC0200008040.hg.1	6.23	7.82	-3.01	0.0003	SMYD5	SMYD family member 5
TC0800010417.hg.1	12	10.63	2.59	0.0003	PCMTD1	protein-L-isoaspartate (D-aspartate) O-methyltransferase domain containing 1
TC0200016770.hg.1	7.45	9.31	-3.63	0.0003	MIR6809; TNS1	microRNA 6809; tensin 1
TC1200008683.hg.1	12.75	14.53	-3.44	0.0003	CHST11	carbohydrate (chondroitin 4) sulfotransferase 11
TC1700009850.hg.1	14.32	13.12	2.3	0.0003	PMP22	peripheral myelin protein 22
TC0800007529.hg.1	9.31	7.87	2.7	0.0003	SPIDR	scaffolding protein involved in DNA repair
TC0400012900.hg.1	9.35	10.49	-2.2	0.0003	FBXL5	F-box and leucine-rich repeat protein 5
TC0200016560.hg.1	4.37	5.92	-2.92	0.0003	KLHL41	kelch-like family member 41
TC1000011515.hg.1	11.12	9.38	3.33	0.0003	BLNK	B-cell linker
TC1200011002.hg.1	8.95	7.24	3.25	0.0003	LRIG3	leucine-rich repeats and immunoglobulin-like domains 3
TC1600009777.hg.1	12.05	10.98	2.09	0.0003	ARHGAP17	Rho GTPase activating protein 17
TC1900011985.hg.1	7.28	9.19	-3.75	0.0003	DMWD	dystrophia myotonica, WD repeat containing
TC1800006882.hg.1	12.23	10.29	3.83	0.0003	CABLES1	Cdk5 and Abl enzyme substrate 1
TC1500007238.hg.1	9.29	7.75	2.91	0.0003	TMOD2	tropomodulin 2 (neuronal)
TC1600011358.hg.1	7.04	9.17	-4.36	0.0004	C16orf45	chromosome 16 open reading frame 45
TC0400010470.hg.1	8.75	7.3	2.72	0.0004	SMIM14	small integral membrane protein 14
TC0500008890.hg.1	9.28	11.42	-4.42	0.0004	PCDHGC3; PCDHGA12; PCDHGB4; PCDHGA8; PCDHGA1; PCDHGA10; PCDHGA11; PCDHGA2; PCDHGA3; PCDHGA4; PCDHGA5; PCDHGA6; PCDHGA7; PCDHGA9; PCDHGB1; PCDHGB2; PCDHGB3; PCDHGB5; PCDHGB6; PCDHGB7; PCDHGC4; PCDHGC5	protocadherin gamma subfamily C, 3; protocadherin gamma subfamily A, 12; protocadherin gamma subfamily B, 4; protocadherin gamma subfamily A, 8; protocadherin gamma subfamily A, 1; protocadherin gamma subfamily A, 10; protocadherin gamma subfamily A, 11; protocadherin gamma subfamily A, 2; protocadherin gamma subfamily A, 3; protocadherin gamma subfamily A, 4; protocadherin gamma subfamily A, 5; …
TC0300013915.hg.1	5.13	7.12	-3.98	0.0004	TPRG1	tumor protein p63 regulated 1
TC0400009936.hg.1	10.88	12.12	-2.36	0.0004	GRPEL1	GrpE-like 1, mitochondrial (E. coli)
TC0300010770.hg.1	6.66	7.79	-2.2	0.0004	CSRNP1	cysteine-serine-rich nuclear protein 1
TC2200009252.hg.1	6	7.3	-2.46	0.0004	SEC14L2	SEC14-like lipid binding 2
TC0300012195.hg.1	8.15	6.96	2.29	0.0004	HSPBAP1	HSPB (heat shock 27kDa) associated protein 1
TC1900009766.hg.1	9.22	10.26	-2.05	0.0004	TRMT1	tRNA methyltransferase 1
TC0200007174.hg.1	11.48	10.34	2.21	0.0004	SPAST	spastin
TC0700013491.hg.1	12.36	10.45	3.76	0.0004	GIMAP1-GIMAP5; GIMAP5; GIMAP1	GIMAP1-GIMAP5 readthrough; GTPase, IMAP family member 5; GTPase, IMAP family member 1
TC1100007017.hg.1	12.43	11.07	2.56	0.0004	TMEM86A	transmembrane protein 86A
TC0100008243.hg.1	9.51	11.81	-4.93	0.0004	ELAVL4	ELAV like neuron-specific RNA binding protein 4
TC1800008691.hg.1	9.46	8.17	2.44	0.0004	MRO	maestro
TC0400010615.hg.1	7.03	5.41	3.07	0.0004	TXK	TXK tyrosine kinase
TC0800006927.hg.1	8.73	14.32	-48.33	0.0004	LPL	lipoprotein lipase
TC2200007614.hg.1	9.36	8.2	2.23	0.0004	FAM118A	family with sequence similarity 118, member A
TC1700007585.hg.1	13.16	11.67	2.81	0.0004	SLFN5	schlafen family member 5
TC0400008106.hg.1	9.75	7.92	3.54	0.0004	HERC5	HECT and RLD domain containing E3 ubiquitin protein ligase 5
TC1900009754.hg.1	13.16	10.59	5.94	0.0004	DNASE2	deoxyribonuclease II, lysosomal
TC0200015631.hg.1	7.17	5.57	3.04	0.0004	IKZF2	IKAROS family zinc finger 2
TC0600009279.hg.1	10.27	9.25	2.02	0.0004	ASF1A	anti-silencing function 1A histone chaperone
TC0500009109.hg.1	5.71	7.3	-2.99	0.0004	GPX3	glutathione peroxidase 3
TC1000008891.hg.1	6.52	9.74	-9.35	0.0004	DUSP5	dual specificity phosphatase 5
TC1000008744.hg.1	10.34	11.59	-2.38	0.0004	TRIM8	tripartite motif containing 8
TC1100013222.hg.1	13.28	12.09	2.27	0.0004	CARD16	caspase recruitment domain family, member 16
TC1000007779.hg.1	8.85	10.1	-2.37	0.0004	ADO	2-aminoethanethiol (cysteamine) dioxygenase
TC0800008145.hg.1	13.77	12.29	2.79	0.0004	WWP1	WW domain containing E3 ubiquitin protein ligase 1
TC0700011570.hg.1	10.37	11.51	-2.19	0.0004	YWHAG	tyrosine 3-monooxygenase/tryptophan 5-monooxygenase activation protein, gamma
TC1700007262.hg.1	7.28	9.75	-5.56	0.0004	MAP2K3	mitogen-activated protein kinase kinase 3
TC0300013471.hg.1	13.59	15.1	-2.84	0.0004	BCL6	B-cell CLL/lymphoma 6
TC0100012211.hg.1	7.79	6.5	2.45	0.0005	ZBTB18	zinc finger and BTB domain containing 18
TC0500011049.hg.1	13.88	12.14	3.33	0.0005	NAIP	NLR family, apoptosis inhibitory protein
TC1300007774.hg.1	12.58	11.12	2.75	0.0005	MBNL2	muscleblind-like splicing regulator 2
TC1900010502.hg.1	7.13	11.63	-22.71	0.0005	NFKBID	nuclear factor of kappa light polypeptide gene enhancer in B-cells inhibitor, delta
TC0900008467.hg.1	7.44	6.06	2.61	0.0005	KIAA1958	KIAA1958
TC0900012212.hg.1	11.95	13.02	-2.09	0.0005	PLIN2	perilipin 2
TC0900008949.hg.1	8.04	10.8	-6.79	0.0005	NCS1	neuronal calcium sensor 1
TSUnmapped00000606.hg.1	5.68	4.3	2.61	0.0005	FMN1	formin 1
TC0400008228.hg.1	9.46	10.73	-2.41	0.0005	METAP1	methionyl aminopeptidase 1
TC0200014108.hg.1	10.23	11.78	-2.93	0.0005	NIFK	nucleolar protein interacting with the FHA domain of MKI67
TC0400008803.hg.1	10.48	8.87	3.06	0.0005	RAB33B	RAB33B, member RAS oncogene family
TC1900006866.hg.1	7.02	8.42	-2.63	0.0005	SNAPC2	small nuclear RNA activating complex polypeptide 2
TC0700008090.hg.1	13.38	14.51	-2.19	0.0005	HSPB1	heat shock 27kDa protein 1
TC0400012432.hg.1	13.21	12.18	2.03	0.0005	HMGB2	high mobility group box 2
TC1000009612.hg.1	11.85	13.34	-2.81	0.0005	KLF6	Kruppel-like factor 6
TC0400012811.hg.1	11.45	10.26	2.28	0.0005	DCK	deoxycytidine kinase
TC0600014143.hg.1	12.34	11.19	2.22	0.0005	PHF3	PHD finger protein 3
TC2000009268.hg.1	11.69	12.94	-2.38	0.0005	ELMO2	engulfment and cell motility 2
TC1900008623.hg.1	12.32	14.47	-4.42	0.0005	SIGLEC9	sialic acid binding Ig-like lectin 9
TC1400010749.hg.1	6.45	7.6	-2.22	0.0005	LINC01599	long intergenic non-protein coding RNA 1599
TC1900006508.hg.1	10.26	8.92	2.54	0.0006	ABCA7	ATP binding cassette subfamily A member 7
TC0700011705.hg.1	9.1	10.29	-2.28	0.0006	ABCB4	ATP binding cassette subfamily B member 4
TC0400012846.hg.1	11.3	12.63	-2.52	0.0006	NAA15	N(alpha)-acetyltransferase 15, NatA auxiliary subunit
TC0500012299.hg.1	13.02	11.27	3.36	0.0006	PCDH12	protocadherin 12
TC1700010038.hg.1	7.9	6.68	2.32	0.0006	ULK2	unc-51 like autophagy activating kinase 2
TC2100008545.hg.1	11.62	10.49	2.2	0.0006	NRIP1	nuclear receptor interacting protein 1
TC0900006442.hg.1	4.43	7.68	-9.51	0.0006	KANK1	KN motif and ankyrin repeat domains 1
TC0300012935.hg.1	5.55	6.93	-2.6	0.0006	SHOX2	short stature homeobox 2
TC0700006669.hg.1	8.96	10.46	-2.82	0.0006	MIOS	missing oocyte, meiosis regulator, homolog (Drosophila)
TC2200008447.hg.1	9.12	10.34	-2.34	0.0006	PES1	pescadillo ribosomal biogenesis factor 1
TC1700009123.hg.1	11.36	10.11	2.37	0.0006	RNF213	ring finger protein 213
TC1900011969.hg.1	5.73	7.19	-2.75	0.0006	IRGQ	immunity-related GTPase family, Q
TC1900009208.hg.1	9	10.28	-2.43	0.0006	AP3D1	adaptor-related protein complex 3, delta 1 subunit
TC0600009142.hg.1	10.49	11.82	-2.52	0.0006	RPF2	ribosome production factor 2 homolog
TC0300006602.hg.1	7.82	6.72	2.13	0.0006	HRH1	histamine receptor H1
TC0400012854.hg.1	11.74	10.51	2.35	0.0006	TMEM144	transmembrane protein 144
TC1200008748.hg.1	9.83	10.91	-2.1	0.0006	PWP1	PWP1 homolog, endonuclein
TC0100017107.hg.1	7.84	9.06	-2.32	0.0006	IL10	interleukin 10
TC1200008606.hg.1	6.12	7.34	-2.32	0.0006	UTP20	UTP20 small subunit (SSU) processome component
TC0400009001.hg.1	6.27	3.58	6.43	0.0006	FAM160A1	family with sequence similarity 160, member A1
TC0100018451.hg.1	9.99	11.9	-3.75	0.0006	GBP2	guanylate binding protein 2, interferon-inducible
TC0100011696.hg.1	8.12	5.17	7.69	0.0006	FAM177B	family with sequence similarity 177, member B
TC0700007409.hg.1	12.58	11.53	2.07	0.0006	CCM2	cerebral cavernous malformation 2
TC0800011312.hg.1	12.11	10.92	2.27	0.0006	RRM2B	ribonucleotide reductase M2 B (TP53 inducible)
TC0100015629.hg.1	6.51	5.19	2.5	0.0006	FMO5	flavin containing monooxygenase 5
TC1100008199.hg.1	4.64	6.34	-3.25	0.0006	GAL	galanin/GMAP prepropeptide
TC1700008452.hg.1	8.44	7.11	2.5	0.0006	GDPD1	glycerophosphodiester phosphodiesterase domain containing 1
TC1900006507.hg.1	11.43	12.47	-2.06	0.0006	CNN2	calponin 2
TC1900011747.hg.1	4.93	6.09	-2.24	0.0006	ZNF576	zinc finger protein 576
TC1700007922.hg.1	6.08	4.64	2.72	0.0006	G6PC	glucose-6-phosphatase, catalytic subunit
TC0200011287.hg.1	6.09	8.28	-4.57	0.0006	ASB1	ankyrin repeat and SOCS box containing 1
TC0300013981.hg.1	6.82	7.95	-2.19	0.0006	IFRD2	interferon-related developmental regulator 2
TC1600010734.hg.1	9.55	10.69	-2.21	0.0006	NOB1	NIN1/RPN12 binding protein 1 homolog
TC1200008275.hg.1	10.09	8.67	2.69	0.0007	SYT1	synaptotagmin I
TC0600014360.hg.1	12.17	13.85	-3.2	0.0007	IPCEF1	interaction protein for cytohesin exchange factors 1
TC0300007051.hg.1	11.3	9.82	2.79	0.0007	ITGA9	integrin alpha 9
TC1900010047.hg.1	6.43	7.47	-2.04	0.0007	NR2C2AP	nuclear receptor 2C2-associated protein
TC0400009137.hg.1	8.89	10.24	-2.55	0.0007	FNIP2	folliculin interacting protein 2
TC0100011461.hg.1	9	10.22	-2.32	0.0007	DIEXF	digestive organ expansion factor homolog (zebrafish)
TC0300007437.hg.1	8.11	9.46	-2.55	0.0007	MANF	mesencephalic astrocyte-derived neurotrophic factor
TC0800008493.hg.1	5.54	8.75	-9.27	0.0007	DCSTAMP	dendrocyte expressed seven transmembrane protein
TC1800007905.hg.1	12.77	11.53	2.38	0.0007	LPIN2	lipin 2
TC0200008663.hg.1	5.66	8.5	-7.17	0.0007	IL1R2	interleukin 1 receptor, type II
TC1000009414.hg.1	8.7	10.26	-2.94	0.0007	INPP5A	inositol polyphosphate-5-phosphatase A
TC0600013431.hg.1	9.84	10.98	-2.21	0.0007	PLAGL1; HYMAI	pleiomorphic adenoma gene-like 1; hydatidiform mole associated and imprinted (non-protein coding)
TC0600009102.hg.1	11.84	10.6	2.36	0.0007	FIG4	FIG4 phosphoinositide 5-phosphatase
TC1400009123.hg.1	10.79	9.61	2.26	0.0007	SOS2	SOS Ras/Rho guanine nucleotide exchange factor 2
TC1100013221.hg.1	12.61	11.42	2.28	0.0007	CASP1	caspase 1
TC0800011887.hg.1	9.37	10.88	-2.85	0.0007	ST3GAL1	ST3 beta-galactoside alpha-2,3-sialyltransferase 1
TC2000007283.hg.1	9.44	12.44	-8.02	0.0007	SRC	SRC proto-oncogene, non-receptor tyrosine kinase
TC2000009968.hg.1	11.89	10.53	2.56	0.0007	SIRPB2	signal-regulatory protein beta 2
TC0300011485.hg.1	10.91	9.61	2.46	0.0007	FOXP1	forkhead box P1
TC0900008491.hg.1	6.92	8.35	-2.68	0.0007	RGS3	regulator of G-protein signaling 3
TC0300007194.hg.1	7.98	6.82	2.23	0.0007	ABHD5	abhydrolase domain containing 5
TC0500011758.hg.1	8.09	6.68	2.66	0.0007	CDO1	cysteine dioxygenase type 1
TC0600011674.hg.1	10.85	11.94	-2.13	0.0007	PPIL1	peptidylprolyl isomerase (cyclophilin)-like 1
TC1200007352.hg.1	9.13	7.11	4.05	0.0007	LRRK2	leucine-rich repeat kinase 2
TC0700012836.hg.1	11.22	10	2.32	0.0008	KIAA1147	KIAA1147
TC0600014276.hg.1	9.76	8.28	2.78	0.0008	HLA-DMB	major histocompatibility complex, class II, DM beta
TC0100014009.hg.1	8.59	7.24	2.53	0.0008	TESK2	testis-specific kinase 2
TC0100010672.hg.1	9.48	7.89	3.01	0.0008	RABGAP1L	RAB GTPase activating protein 1-like
TC0100017534.hg.1	5.87	8.21	-5.09	0.0008	ITPKB	inositol-trisphosphate 3-kinase B
TC1600009642.hg.1	12.99	11.95	2.06	0.0008	GDE1	glycerophosphodiester phosphodiesterase 1
TC1200009903.hg.1	8.98	7.29	3.22	0.0008	KLRC4-KLRK1; KLRK1; KLRC4	KLRC4-KLRK1 readthrough; killer cell lectin-like receptor subfamily K, member 1; killer cell lectin-like receptor subfamily C, member 4
TC1400009391.hg.1	7.32	8.41	-2.13	0.0008	WDR89	WD repeat domain 89
TC2100006879.hg.1	3.33	4.4	-2.1	0.0008	KRTAP22-1	keratin associated protein 22-1
TC1600009952.hg.1	13.13	10.73	5.26	0.0008	YPEL3	yippee like 3
TC0100007529.hg.1	7.21	8.29	-2.12	0.0008	FAM76A	family with sequence similarity 76, member A
TC0X00006799.hg.1	14.34	12.8	2.92	0.0008	SAT1	spermidine/spermine N1-acetyltransferase 1
TC0900008425.hg.1	8.55	7.48	2.11	0.0008	ZNF483	zinc finger protein 483
TC1200006604.hg.1	12.71	14.83	-4.33	0.0008	CD9	CD9 molecule
TC1600008226.hg.1	9.91	11.45	-2.91	0.0008	NIP7	NIP7, nucleolar pre-rRNA processing protein
TC1600008220.hg.1	10.75	12.39	-3.1	0.0008	UTP4	UTP4 small subunit (SSU) processome component
TC0500011240.hg.1	4.99	7.67	-6.39	0.0008	HOMER1	homer scaffolding protein 1
TC0600007302.hg.1	8.76	7.59	2.24	0.0008	BTN2A2	butyrophilin, subfamily 2, member A2
TC0500011146.hg.1	9.44	11.01	-2.97	0.0008	ENC1	ectodermal-neural cortex 1 (with BTB domain)
TC0200013511.hg.1	7.11	8.95	-3.58	0.0008	DUSP2	dual specificity phosphatase 2
TC0400008686.hg.1	8.11	7.05	2.09	0.0008	C4orf33	chromosome 4 open reading frame 33
TC1700006480.hg.1	9.94	11.22	-2.42	0.0008	TIMM22	translocase of inner mitochondrial membrane 22 homolog (yeast)
TC0600010681.hg.1	6.42	7.83	-2.66	0.0008	RPP40	ribonuclease P/MRP 40kDa subunit
TC1500008955.hg.1	10.08	9.07	2.01	0.0008	FMN1	formin 1
TC1800006757.hg.1	8.52	7.17	2.55	0.0008	LDLRAD4	low density lipoprotein receptor class A domain containing 4
TC0300006847.hg.1	10.41	8.51	3.72	0.0008	NR1D2	nuclear receptor subfamily 1, group D, member 2
TC1500009460.hg.1	8.83	7.6	2.34	0.0009	FAM214A	family with sequence similarity 214, member A
TC1000008529.hg.1	7.45	8.66	-2.32	0.0009	CCNJ	cyclin J
TC1100010216.hg.1	7.63	5.44	4.58	0.0009	PLEKHA7	pleckstrin homology domain containing, family A member 7
TC1200006737.hg.1	8.35	9.69	-2.54	0.0009	PHC1	polyhomeotic homolog 1 (Drosophila)
TC0700007997.hg.1	11.12	12.45	-2.52	0.0009	LIMK1	LIM domain kinase 1
TC0200010480.hg.1	9.7	10.97	-2.41	0.0009	NOP58	NOP58 ribonucleoprotein
TC1500009514.hg.1	9.67	8.63	2.06	0.0009	RFX7	regulatory factor X, 7
TC0900006531.hg.1	5.96	7.32	-2.57	0.0009	RCL1	RNA terminal phosphate cyclase-like 1
TC0300011899.hg.1	10.32	11.77	-2.74	0.0009	CBLB	Cbl proto-oncogene B, E3 ubiquitin protein ligase
TC0900007971.hg.1	10.79	9.37	2.66	0.0009	FGD3	FYVE, RhoGEF and PH domain containing 3
TC0200010790.hg.1	9.85	8.46	2.63	0.0009	GPBAR1	G protein-coupled bile acid receptor 1
TC0900009673.hg.1	8.59	7.43	2.24	0.0009	MLLT3	myeloid/lymphoid or mixed-lineage leukemia; translocated to, 3
TC0600007771.hg.1	11.84	10.64	2.29	0.0009	UHRF1BP1	UHRF1 binding protein 1
TC0300008271.hg.1	11.77	10.47	2.46	0.0009	BBX	bobby sox homolog (Drosophila)
TC0200014728.hg.1	13.05	11.84	2.33	0.0009	LY75-CD302; CD302; LY75	LY75-CD302 readthrough; CD302 molecule; lymphocyte antigen 75
TC0400008943.hg.1	7.08	10.81	-13.29	0.0009	EDNRA	endothelin receptor type A
TC1600010825.hg.1	8.54	7.23	2.48	0.0009	ZFHX3	zinc finger homeobox 3
TC0600014223.hg.1	8.21	6.61	3.02	0.0009	SLC22A23	solute carrier family 22, member 23
TC1600010623.hg.1	8.36	10.43	-4.18	0.0009	FHOD1	formin homology 2 domain containing 1
TC1200010795.hg.1	5.09	6.44	-2.55	0.001	RARG	retinoic acid receptor, gamma
TC1600011350.hg.1	7.13	8.94	-3.5	0.001	PMM2	phosphomannomutase 2
TC0800011334.hg.1	8.28	10.4	-4.35	0.001	KLF10	Kruppel-like factor 10
TC1200010415.hg.1	8.48	7.29	2.29	0.001	SLC2A13	solute carrier family 2 (facilitated glucose transporter), member 13
TC1700011699.hg.1	10.14	11.62	-2.78	0.001	CD300C	CD300c molecule
TC0700011796.hg.1	8.76	7.56	2.29	0.001	SAMD9	sterile alpha motif domain containing 9
TC0100008549.hg.1	3.44	4.45	-2.02	0.001	L1TD1	LINE-1 type transposase domain containing 1
TC0900007904.hg.1	12.03	10.83	2.31	0.001	SYK	spleen tyrosine kinase
TC0200014764.hg.1	8.27	9.3	-2.04	0.001	DPP4	dipeptidyl-peptidase 4
TC2000008121.hg.1	6.15	4.78	2.58	0.001	C20orf96	chromosome 20 open reading frame 96
TC0900011241.hg.1	5.71	7.96	-4.77	0.001	SLC46A2	solute carrier family 46, member 2
TC1400009967.hg.1	9.36	11.01	-3.14	0.001	TTC7B	tetratricopeptide repeat domain 7B
TC1400009481.hg.1	9.93	11.26	-2.52	0.001	PLEK2	pleckstrin 2
TC0700011495.hg.1	9.5	10.61	-2.16	0.001	TBL2	transducin (beta)-like 2
TC1900007096.hg.1	10.07	11.5	-2.69	0.001	JUNB	jun B proto-oncogene
TC1200011301.hg.1	8.53	9.57	-2.06	0.001	KRR1	KRR1, small subunit (SSU) processome component, homolog (yeast)
TC0400011791.hg.1	9.77	8.52	2.37	0.001	ANKRD50	ankyrin repeat domain 50
TC1500010753.hg.1	6.45	5.08	2.59	0.001	TLN2	talin 2
TC0200013298.hg.1	10.21	11.9	-3.22	0.001	ST3GAL5	ST3 beta-galactoside alpha-2,3-sialyltransferase 5
TC0100018360.hg.1	7.6	6.36	2.36	0.001	DISC1	disrupted in schizophrenia 1
TC0800012386.hg.1	7.51	8.67	-2.23	0.0011	PINX1; MIR1322	PIN2/TERF1 interacting, telomerase inhibitor 1; microRNA 1322
TC1200008346.hg.1	6.8	5.6	2.29	0.0011	ALX1	ALX homeobox 1
TC1900008057.hg.1	13.08	15	-3.78	0.0011	ZFP36	ZFP36 ring finger protein
TC0100016548.hg.1	9.96	11.13	-2.25	0.0011	ABL2	ABL proto-oncogene 2, non-receptor tyrosine kinase
TC0800011132.hg.1	5.72	7.49	-3.41	0.0011	GEM	GTP binding protein overexpressed in skeletal muscle
TC0200014672.hg.1	4.08	8.42	-20.21	0.0011	NR4A2	nuclear receptor subfamily 4, group A, member 2
TC1000012423.hg.1	13.64	14.94	-2.46	0.0011	PFKP	phosphofructokinase, platelet
TC0700007477.hg.1	6.53	8.19	-3.16	0.0011	UPP1	uridine phosphorylase 1
TC0400011234.hg.1	4.96	3.68	2.42	0.0011	MAPK10	mitogen-activated protein kinase 10
TC0100010152.hg.1	13.9	15.42	-2.86	0.0011	LMNA	lamin A/C
TC0600009783.hg.1	7.22	10.29	-8.35	0.0011	UST	uronyl-2-sulfotransferase
TC1900010706.hg.1	9.69	11.08	-2.63	0.0011	SERTAD1	SERTA domain containing 1
TC0X00010098.hg.1	6.36	4.62	3.33	0.0011	KIAA2022	KIAA2022
TC0300007489.hg.1	9.07	10.49	-2.66	0.0011	GNL3; SNORD19B	guanine nucleotide binding protein-like 3 (nucleolar); small nucleolar RNA, C/D box 19B
TC1100007938.hg.1	12.09	13.11	-2.03	0.0011	FERMT3	fermitin family member 3
TC1900010941.hg.1	11.83	12.88	-2.06	0.0012	ERCC1	excision repair cross-complementation group 1
TC1500007093.hg.1	11.13	12.16	-2.04	0.0012	EIF3J	eukaryotic translation initiation factor 3, subunit J
TC0100016715.hg.1	8.07	9.69	-3.08	0.0012	PTGS2	prostaglandin-endoperoxide synthase 2 (prostaglandin G/H synthase and cyclooxygenase)
TC0400009221.hg.1	10.73	12.11	-2.6	0.0012	MSMO1	methylsterol monooxygenase 1
TC1200012815.hg.1	5.8	8.06	-4.78	0.0012	METTL1	methyltransferase like 1
TC0800012422.hg.1	11.62	10.59	2.04	0.0012	VCPIP1	valosin containing protein (p97)/p47 complex interacting protein 1
TC0100008874.hg.1	10.23	9.12	2.17	0.0012	PRKACB	protein kinase, cAMP-dependent, catalytic, beta
TC1600008675.hg.1	11.96	10.39	2.98	0.0012	KIAA0513	KIAA0513
TC0300011403.hg.1	8.42	7.23	2.29	0.0012	MAGI1	membrane associated guanylate kinase, WW and PDZ domain containing 1
TC0400012029.hg.1	10.82	12	-2.27	0.0012	OTUD4	OTU deubiquitinase 4
TC1700010723.hg.1	5.47	7.62	-4.41	0.0012	PTRF	polymerase I and transcript release factor
TC0500013322.hg.1	14.27	12.81	2.75	0.0012	NAIP	NLR family, apoptosis inhibitory protein
TC0800010823.hg.1	11.43	12.64	-2.33	0.0012	TCEB1	transcription elongation factor B (SIII), polypeptide 1 (15kDa, elongin C)
TC0100007295.hg.1	10.82	9.38	2.72	0.0012	EPHB2	EPH receptor B2
TC0100018315.hg.1	9.37	10.56	-2.28	0.0012	UCK2; MIR3658	uridine-cytidine kinase 2; microRNA 3658
TC2100007467.hg.1	10.79	9.78	2.01	0.0012	DIP2A	disco-interacting protein 2 homolog A
TC1200012855.hg.1	5.35	4.2	2.22	0.0012	VSIG10	V-set and immunoglobulin domain containing 10
TC1100012957.hg.1	10.92	9.71	2.32	0.0013	TRIM22	tripartite motif containing 22
TC0200015336.hg.1	10.65	9.59	2.08	0.0013	ANKRD44	ankyrin repeat domain 44
TC0400008879.hg.1	10.28	8.81	2.76	0.0013	GAB1	GRB2-associated binding protein 1
TC0200008900.hg.1	11.66	12.93	-2.4	0.0013	TMEM87B	transmembrane protein 87B
TC0200010518.hg.1	7.61	8.74	-2.19	0.0013	ABI2	abl-interactor 2
TC1000007703.hg.1	3.62	4.71	-2.12	0.0013	BICC1	BicC family RNA binding protein 1
TC1400007732.hg.1	10.59	11.77	-2.27	0.0013	VASH1	vasohibin 1
TC1700006569.hg.1	9.17	7.77	2.63	0.0013	RAP1GAP2	RAP1 GTPase activating protein 2
TC1800006731.hg.1	10.56	11.62	-2.08	0.0013	TUBB6	tubulin, beta 6 class V
TC1600009260.hg.1	7.27	8.33	-2.09	0.0013	EEF2KMT	eukaryotic elongation factor 2 lysine methyltransferase
TC0200008806.hg.1	14.28	15.43	-2.21	0.0013	LIMS1	LIM and senescent cell antigen-like domains 1
TC0900006560.hg.1	8.77	6.59	4.53	0.0013	PDCD1LG2	programmed cell death 1 ligand 2
TC1700007777.hg.1	8.66	7.54	2.17	0.0013	THRA	thyroid hormone receptor, alpha
TC1300008793.hg.1	8.41	9.95	-2.92	0.0013	TSC22D1	TSC22 domain family, member 1
TC1700008938.hg.1	9.52	10.57	-2.06	0.0013	UBALD2	UBA-like domain containing 2
TC0100011001.hg.1	11.42	9.2	4.68	0.0014	RGS18	regulator of G-protein signaling 18
TC0300013360.hg.1	10.2	9.1	2.15	0.0014	ABCC5	ATP binding cassette subfamily C member 5
TC1700011697.hg.1	6.93	8.16	-2.35	0.0014	CD300LB	CD300 molecule-like family member b
TC1200009420.hg.1	6.11	4.9	2.31	0.0014	ADGRD1	adhesion G protein-coupled receptor D1
TSUnmapped00000819.hg.1	12.02	13.05	-2.05	0.0014	PCYT1A	phosphate cytidylyltransferase 1, choline, alpha
TC0200016702.hg.1	10.05	11.08	-2.05	0.0014	POLR1A	polymerase (RNA) I polypeptide A
TC0500007758.hg.1	12.15	10.92	2.36	0.0014	FCHO2	FCH domain only 2
TC0200016618.hg.1	8.64	9.67	-2.05	0.0014	RNASEH1	ribonuclease H1
TC1100007729.hg.1	6.74	5.74	2	0.0014	DTX4	deltex 4, E3 ubiquitin ligase
TC0800012457.hg.1	9.55	10.67	-2.17	0.0014	TMEM65	transmembrane protein 65
TC0700011803.hg.1	5.11	4.02	2.12	0.0014	CALCR	calcitonin receptor
TC0900008219.hg.1	4.73	10.91	-72.49	0.0014	NR4A3	nuclear receptor subfamily 4, group A, member 3
TC0400006742.hg.1	8.55	9.72	-2.24	0.0014	SH3TC1	SH3 domain and tetratricopeptide repeats 1
TC0800009875.hg.1	6.35	7.66	-2.48	0.0014	TNFRSF10A	tumor necrosis factor receptor superfamily, member 10a
TSUnmapped00000571.hg.1	5.11	7.17	-4.15	0.0015	GREM1	gremlin 1, DAN family BMP antagonist [Source:HGNC Symbol;Acc:HGNC:2001]
TC1200010874.hg.1	11.53	14.35	-7.03	0.0015	MMP19	matrix metallopeptidase 19
TC1800009222.hg.1	10.76	8.94	3.52	0.0015	RNF125	ring finger protein 125, E3 ubiquitin protein ligase
TC1100010054.hg.1	9.43	11.51	-4.22	0.0015	NRIP3	nuclear receptor interacting protein 3
TC0200009067.hg.1	12.33	10.79	2.91	0.0015	TMEM37	transmembrane protein 37
TC0100012242.hg.1	8.98	7.96	2.03	0.0015	EFCAB2	EF-hand calcium binding domain 2
TC0100016024.hg.1	5.5	6.62	-2.16	0.0015	SH2D2A	SH2 domain containing 2A
TC1500009904.hg.1	10.34	11.84	-2.83	0.0015	TLE3	transducin-like enhancer of split 3
TC1600008231.hg.1	8.44	9.44	-2	0.0015	NFAT5	nuclear factor of activated T-cells 5, tonicity-responsive
TC1800009268.hg.1	10.28	8.94	2.54	0.0015	DSC2	desmocollin 2
TC0800010002.hg.1	5.97	9.38	-10.65	0.0015	DUSP4	dual specificity phosphatase 4
TC1200009910.hg.1	5.16	4	2.23	0.0015	KLRAP1	killer cell lectin-like receptor subfamily A pseudogene 1
TC0200016494.hg.1	9.57	8.17	2.65	0.0015	CNNM4	cyclin and CBS domain divalent metal cation transport mediator 4
TC0500010615.hg.1	15.35	13.74	3.03	0.0016	SEPP1	selenoprotein P, plasma, 1
TC1300009309.hg.1	9.29	7.92	2.6	0.0016	EDNRB	endothelin receptor type B
TC0800010132.hg.1	9.01	7.89	2.17	0.0016	LOC102723701; RP11-863K10.7	uncharacterized LOC102723701; novel transcript, antisense to ERLIN2
TC0800009247.hg.1	9.19	10.2	-2.01	0.0016	HSF1	heat shock transcription factor 1
TC0300009500.hg.1	13.24	14.51	-2.42	0.0016	FNDC3B	fibronectin type III domain containing 3B
TC0700012512.hg.1	11	9.77	2.34	0.0016	LRRC4	leucine rich repeat containing 4
TC1600009236.hg.1	7.03	8.32	-2.45	0.0016	UBALD1	UBA-like domain containing 1
TC0500010203.hg.1	6.99	9.36	-5.17	0.0016	MYO10	myosin X
TSUnmapped00000559.hg.1	9.4	7.93	2.78	0.0016	FMN1	formin 1
TC0X00007504.hg.1	6.83	8.08	-2.37	0.0016	STARD8	StAR-related lipid transfer domain containing 8
TC0700006813.hg.1	9.66	11.19	-2.89	0.0016	HDAC9	histone deacetylase 9
TC1700009318.hg.1	9.54	11.46	-3.78	0.0016	FAM101B	family with sequence similarity 101, member B
TC2100008272.hg.1	6.33	7.42	-2.13	0.0016	WDR4	WD repeat domain 4
TC0200016578.hg.1	7.19	8.34	-2.21	0.0016	NUP35	nucleoporin 35kDa
TC0200008617.hg.1	8.59	9.81	-2.34	0.0016	PDCL3	phosducin like 3
TC1200012748.hg.1	12.15	10.89	2.4	0.0017	CD163L1	CD163 molecule-like 1
TC0600007012.hg.1	8.2	13.78	-47.96	0.0017	CD83	CD83 molecule
TC0100008938.hg.1	10.21	8.69	2.88	0.0017	LMO4	LIM domain only 4
TC2000007686.hg.1	10.36	11.64	-2.43	0.0017	LINC01272	long intergenic non-protein coding RNA 1272
TC1200010265.hg.1	12.02	10.95	2.1	0.0017	CAPRIN2	caprin family member 2
TC2000006518.hg.1	11.31	12.45	-2.22	0.0017	NOP56; SNORD57; SNORD56; SNORA51; SNORD110; SNORD86; MIR1292	NOP56 ribonucleoprotein; small nucleolar RNA, C/D box 57; small nucleolar RNA, C/D box 56; small nucleolar RNA, H/ACA box 51; small nucleolar RNA, C/D box 110; small nucleolar RNA, C/D box 86; microRNA 1292
TC0X00011121.hg.1	11.79	10.38	2.67	0.0017	GABRE; MIR224; MIR452	gamma-aminobutyric acid (GABA) A receptor, epsilon; microRNA 224; microRNA 452
TC0200010219.hg.1	9.66	7.76	3.73	0.0017	FAM171B	family with sequence similarity 171, member B
TC0300008839.hg.1	12.66	11.28	2.62	0.0017	ACPP	acid phosphatase, prostate
TC0200006687.hg.1	9.54	11.41	-3.65	0.0017	HPCAL1	hippocalcin-like 1
TC0100017708.hg.1	5.18	6.82	-3.12	0.0017	C1orf198	chromosome 1 open reading frame 198
TC1700008867.hg.1	10.69	9.58	2.16	0.0017	SLC9A3R1; MIR3615	solute carrier family 9, subfamily A (NHE3, cation proton antiporter 3), member 3 regulator 1; microRNA 3615
TC1700007626.hg.1	4.79	9.9	-34.74	0.0017	CCL4L2; CCL4L1	chemokine (C-C motif) ligand 4-like 2; chemokine (C-C motif) ligand 4-like 1
TC1700011038.hg.1	11.03	9.89	2.2	0.0017	ZNF652	zinc finger protein 652
TC0300010315.hg.1	7.72	8.74	-2.03	0.0018	IQSEC1	IQ motif and Sec7 domain 1
TC0200008259.hg.1	13.48	14.51	-2.04	0.0018	MAT2A	methionine adenosyltransferase II, alpha
TC1200010612.hg.1	4.05	5.11	-2.08	0.0018	RHEBL1	Ras homolog enriched in brain like 1
TC1500007851.hg.1	7.52	6.01	2.85	0.0018	ARID3B	AT rich interactive domain 3B (BRIGHT-like)
TC1000008713.hg.1	10.31	11.42	-2.16	0.0018	NOLC1	nucleolar and coiled-body phosphoprotein 1
TC0100010381.hg.1	7.9	9.08	-2.26	0.0018	UAP1	UDP-N-acetylglucosamine pyrophosphorylase 1
TC0300006555.hg.1	6.2	7.31	-2.16	0.0018	BRPF1	bromodomain and PHD finger containing 1
TC0200010263.hg.1	5.34	6.43	-2.13	0.0018	INPP1	inositol polyphosphate-1-phosphatase
TC1200006657.hg.1	14.08	15.09	-2.01	0.0018	PTPN6	protein tyrosine phosphatase, non-receptor type 6
TC0100011253.hg.1	12.07	14.14	-4.19	0.0018	BTG2	BTG family, member 2
TC0200007954.hg.1	13.32	12.11	2.31	0.0018	PCYOX1	prenylcysteine oxidase 1
TC2100008562.hg.1	12.13	13.43	-2.45	0.0018	RUNX1	runt-related transcription factor 1
TC1000009067.hg.1	5.54	4.33	2.31	0.0018	GRK5	G protein-coupled receptor kinase 5
TC0600009206.hg.1	13.75	12.57	2.27	0.0018	MARCKS	myristoylated alanine-rich protein kinase C substrate
TC1200009741.hg.1	5.4	6.67	-2.42	0.0018	NOP2	NOP2 nucleolar protein
TC0600006940.hg.1	8.2	9.21	-2.01	0.0019	SMIM13	small integral membrane protein 13
TC0500009038.hg.1	4.37	2.72	3.13	0.0019	SPINK9	serine peptidase inhibitor, Kazal type 9
TC1100008985.hg.1	10.97	9.92	2.06	0.0019	ATM	ATM serine/threonine kinase
TC1200009676.hg.1	6.02	4.28	3.35	0.0019	AKAP3	A kinase (PRKA) anchor protein 3
TC0600007038.hg.1	9.8	10.87	-2.1	0.0019	JARID2	jumonji, AT rich interactive domain 2
TC0200010785.hg.1	6.89	5.53	2.58	0.0019	CXCR2	chemokine (C-X-C motif) receptor 2
TC0500008014.hg.1	10.76	12.33	-2.95	0.0019	RASA1	RAS p21 protein activator (GTPase activating protein) 1
TC1200012731.hg.1	6.62	7.97	-2.55	0.0019	PGAM5	PGAM family member 5, serine/threonine protein phosphatase, mitochondrial
TC0300008849.hg.1	9.43	10.62	-2.28	0.0019	UBA5	ubiquitin-like modifier activating enzyme 5
TC0X00011206.hg.1	8.11	9.27	-2.23	0.0019	SLC10A3	solute carrier family 10, member 3
TC0200012713.hg.1	6.24	5.06	2.26	0.0019	BCL11A	B-cell CLL/lymphoma 11A (zinc finger protein)
TC0300006580.hg.1	4.39	8.71	-19.99	0.002	IRAK2	interleukin 1 receptor associated kinase 2
TC1500009429.hg.1	12.6	11.48	2.17	0.002	DMXL2	Dmx-like 2
TC0100015764.hg.1	7.08	6.08	2.01	0.002	FAM63A	family with sequence similarity 63, member A
TC0100015714.hg.1	6.96	5.91	2.08	0.002	SV2A	synaptic vesicle glycoprotein 2A
TC0400011978.hg.1	10.79	9.28	2.85	0.002	TBC1D9	TBC1 domain family, member 9 (with GRAM domain)
TC1200006786.hg.1	6.7	8.75	-4.14	0.002	TMEM52B	transmembrane protein 52B
TC0X00010849.hg.1	5.43	7.43	-4	0.002	GPC4	glypican 4
TC1100010400.hg.1	7.06	5.83	2.35	0.002	LGR4	leucine-rich repeat containing G protein-coupled receptor 4
TC0800008674.hg.1	8.4	6.55	3.6	0.002	DEPTOR	DEP domain containing MTOR-interacting protein
TC0100012921.hg.1	11.44	10.12	2.49	0.002	DHRS3; MIR6730	dehydrogenase/reductase (SDR family) member 3; microRNA 6730
TC0600013231.hg.1	12.98	14.99	-4.02	0.002	SGK1	serum/glucocorticoid regulated kinase 1
TC0700011584.hg.1	11.91	10.74	2.26	0.002	FGL2	fibrinogen-like 2
TC1700009515.hg.1	5.62	6.7	-2.12	0.0021	MYBBP1A	MYB binding protein (P160) 1a
TC0800011372.hg.1	10.12	11.29	-2.24	0.0021	SLC25A32	solute carrier family 25 (mitochondrial folate carrier), member 32
TC0100007512.hg.1	5.05	7.35	-4.93	0.0021	GPR3	G protein-coupled receptor 3
TC0300006622.hg.1	5.92	9.22	-9.87	0.0021	PPARG	peroxisome proliferator-activated receptor gamma
TC0200016507.hg.1	4.97	5.99	-2.03	0.0021	LIMS3L; LIMS3	LIM and senescent cell antigen-like domains 3-like; LIM and senescent cell antigen-like domains 3
TC0100018438.hg.1	9.4	10.5	-2.15	0.0021	MOB3C	MOB kinase activator 3C
TC2200009234.hg.1	5.44	9.74	-19.71	0.0021	SPECC1L-ADORA2A	SPECC1L-ADORA2A readthrough (NMD candidate)
TC1200012753.hg.1	3.98	2.85	2.19	0.0021	KLRC2	killer cell lectin-like receptor subfamily C, member 2
TC0500011804.hg.1	8.51	7.15	2.55	0.0021	DTWD2	DTW domain containing 2
TC1500009082.hg.1	11.81	9.89	3.78	0.0021	BMF	Bcl2 modifying factor
TC2000008123.hg.1	7.7	6.68	2.03	0.0022	NRSN2-AS1	NRSN2 antisense RNA 1
TC0100007412.hg.1	7.28	6.18	2.14	0.0022	MAN1C1	mannosidase, alpha, class 1C, member 1
TC0800010193.hg.1	12.5	13.85	-2.55	0.0022	TM2D2	TM2 domain containing 2
TC0100010241.hg.1	9.49	7.38	4.32	0.0022	MNDA	myeloid cell nuclear differentiation antigen
TC0100009482.hg.1	6.22	4.83	2.62	0.0022	HIPK1	Memczak2013 ALT_DONOR, coding, INTERNAL, intronic best transcript NM_198268
TC0600007306.hg.1	9.29	7.67	3.06	0.0022	BTN3A3	butyrophilin, subfamily 3, member A3
TC0100008105.hg.1	5.58	6.86	-2.42	0.0022	PLK3	polo-like kinase 3
TC0200010374.hg.1	4.68	5.79	-2.16	0.0022	MARS2	methionyl-tRNA synthetase 2, mitochondrial
TC0200009299.hg.1	9.12	10.34	-2.34	0.0023	IMP4	IMP4 homolog, U3 small nucleolar ribonucleoprotein
TC1400006544.hg.1	5.66	4.38	2.42	0.0023	SLC39A2	solute carrier family 39 (zinc transporter), member 2
TC1500010869.hg.1	10.16	8.97	2.28	0.0023	CCPG1; MIR628	cell cycle progression 1; microRNA 628
TC0100008588.hg.1	5.13	4.05	2.1	0.0023	EFCAB7; DLEU2L	EF-hand calcium binding domain 7; deleted in lymphocytic leukemia 2-like
TC0800008080.hg.1	12.6	14.51	-3.77	0.0023	FABP5	fatty acid binding protein 5 (psoriasis-associated)
TC0500010869.hg.1	6.86	8.49	-3.09	0.0023	ELOVL7	ELOVL fatty acid elongase 7
TC0300014095.hg.1	6.4	10.85	-21.82	0.0023	TM4SF19	transmembrane 4 L six family member 19
TSUnmapped00000050.hg.1	8.38	7.28	2.14	0.0023	MLXIP	MLX interacting protein
TC0700007345.hg.1	7.98	9.3	-2.5	0.0024	STK17A	serine/threonine kinase 17a
TC0500010169.hg.1	15.18	16.48	-2.47	0.0024	ANKH	ANKH inorganic pyrophosphate transport regulator
TC1500010731.hg.1	8.88	7.88	2.01	0.0024	TRIM69	tripartite motif containing 69
TC1200011460.hg.1	5.05	6.48	-2.68	0.0024	KITLG	KIT ligand
TC2100007327.hg.1	9.33	10.49	-2.23	0.0024	RRP1	ribosomal RNA processing 1
TC1700010565.hg.1	10.78	9.67	2.16	0.0024	FBXL20	F-box and leucine-rich repeat protein 20
TC1200008147.hg.1	11.25	12.44	-2.27	0.0024	CCT2	chaperonin containing TCP1, subunit 2 (beta)
TC1100011107.hg.1	7.47	8.72	-2.37	0.0024	WDR74	WD repeat domain 74
TC1300006989.hg.1	12.25	11.01	2.36	0.0024	AKAP11	A kinase (PRKA) anchor protein 11
TC1600011186.hg.1	10.16	12.63	-5.55	0.0024	SLC7A5	solute carrier family 7 (amino acid transporter light chain, L system), member 5
TC0900011610.hg.1	6.92	8.15	-2.35	0.0024	ST6GALNAC4	ST6 (alpha-N-acetyl-neuraminyl-2,3-beta-galactosyl-1,3)-N-acetylgalactosaminide alpha-2,6-sialyltransferase 4
TC1500010018.hg.1	10.04	11.78	-3.33	0.0024	SEMA7A	semaphorin 7A, GPI membrane anchor (John Milton Hagen blood group)
TC0300006627.hg.1	5.88	7.32	-2.72	0.0025	TSEN2	TSEN2 tRNA splicing endonuclease subunit
TC2200008475.hg.1	9.41	7.53	3.67	0.0025	PIK3IP1	phosphoinositide-3-kinase interacting protein 1
TC0500007143.hg.1	11.97	10.63	2.54	0.0025	SKP2	S-phase kinase-associated protein 2, E3 ubiquitin protein ligase
TC2000008310.hg.1	8.75	9.89	-2.19	0.0025	TRMT6	tRNA methyltransferase 6
TC0700013043.hg.1	11.82	9.77	4.16	0.0025	GIMAP6	GTPase, IMAP family member 6
TC0600013001.hg.1	8.47	7.21	2.39	0.0025	CEP85L	centrosomal protein 85kDa-like
TC0500007154.hg.1	7.87	9.61	-3.34	0.0026	SLC1A3	solute carrier family 1 (glial high affinity glutamate transporter), member 3
TC1200012591.hg.1	8.65	9.91	-2.4	0.0026	EMG1	EMG1 N1-specific pseudouridine methyltransferase
TC1700011558.hg.1	8.36	9.79	-2.7	0.0026	SLC16A6	solute carrier family 16, member 6
TC0100013873.hg.1	7.23	9.76	-5.78	0.0026	HIVEP3	human immunodeficiency virus type I enhancer binding protein 3
TC0400011578.hg.1	9.38	8.16	2.34	0.0026	CASP6	caspase 6
TC0400010601.hg.1	4.54	3.49	2.07	0.0026	COX7B2	cytochrome c oxidase subunit VIIb2
TC0400008972.hg.1	5.84	7.14	-2.46	0.0026	DCLK2	doublecortin-like kinase 2
TC0700010435.hg.1	9.82	8.75	2.1	0.0027	CDCA7L	cell division cycle associated 7-like
TC0800007439.hg.1	7.97	6.76	2.32	0.0027	POLB	polymerase (DNA directed), beta
TC0100014340.hg.1	3.89	5.84	-3.86	0.0027	TACSTD2	tumor-associated calcium signal transducer 2
TC1400007494.hg.1	10.24	11.42	-2.27	0.0027	EIF2S1	eukaryotic translation initiation factor 2, subunit 1 alpha, 35kDa
TC1900006520.hg.1	9.41	10.75	-2.55	0.0027	ATP5D	ATP synthase, H+ transporting, mitochondrial F1 complex, delta subunit
TC0X00009988.hg.1	8.3	7.04	2.4	0.0027	ZMYM3	zinc finger, MYM-type 3
TC0600007792.hg.1	9.04	11.19	-4.43	0.0027	PPARD	peroxisome proliferator-activated receptor delta
TC1200010984.hg.1	12.78	11.68	2.14	0.0028	CTDSP2	CTD small phosphatase 2
TC0300006561.hg.1	8.41	9.49	-2.11	0.0028	JAGN1	jagunal homolog 1
TC1200007821.hg.1	10.91	9.77	2.21	0.0028	SUOX	sulfite oxidase
TC0200007144.hg.1	12.19	13.26	-2.1	0.0029	LCLAT1	lysocardiolipin acyltransferase 1
TC1700008194.hg.1	8.64	9.69	-2.08	0.0029	ABI3	ABI family, member 3
TC0100013368.hg.1	7.9	6.35	2.93	0.0029	PAQR7	progestin and adipoQ receptor family member VII
TC0100009580.hg.1	7.68	9.06	-2.59	0.0029	WDR3	WD repeat domain 3
TC0500008864.hg.1	10.92	12.11	-2.27	0.0029	WDR55	WD repeat domain 55
TC0200014597.hg.1	7.85	10.41	-5.88	0.0029	RND3	Rho family GTPase 3
TC1200007653.hg.1	6.63	11.93	-39.66	0.0029	NR4A1	nuclear receptor subfamily 4, group A, member 1
TC2000008473.hg.1	9.84	8.83	2.01	0.0029	KIF16B	kinesin family member 16B
TC1100012526.hg.1	6.25	9.77	-11.47	0.0029	USP2	ubiquitin specific peptidase 2
TC0400007857.hg.1	4.35	5.76	-2.65	0.0029	AREG	amphiregulin
TC1700010426.hg.1	7.65	6.32	2.51	0.0029	SLFN13	schlafen family member 13
TC0X00010675.hg.1	11.64	10.63	2.01	0.0029	CUL4B	cullin 4B
TC0X00009983.hg.1	4.26	3.21	2.08	0.003	MED12	Memczak2013 ANTISENSE, CDS, coding, INTERNAL best transcript NM_005120
TC1900006969.hg.1	7.19	8.2	-2.02	0.003	PPAN-P2RY11; P2RY11; PPAN	PPAN-P2RY11 readthrough; purinergic receptor P2Y, G-protein coupled, 11; peter pan homolog (Drosophila)
TC1900007988.hg.1	9.18	7.54	3.12	0.003	SIPA1L3	signal-induced proliferation-associated 1 like 3
TC0200010216.hg.1	12.64	11.38	2.39	0.003	ITGAV	integrin alpha V
TC0900010769.hg.1	9.42	11.01	-3.02	0.003	NFIL3	nuclear factor, interleukin 3 regulated
TC0900008776.hg.1	6.16	4.89	2.41	0.003	MVB12B	multivesicular body subunit 12B
TC0400009090.hg.1	10.39	11.57	-2.27	0.0031	TDO2	tryptophan 2,3-dioxygenase
TC0800007004.hg.1	10.47	12.02	-2.92	0.0031	RHOBTB2	Rho-related BTB domain containing 2
TC1600007806.hg.1	9.86	10.99	-2.19	0.0031	HEATR3	HEAT repeat containing 3
TC0300009724.hg.1	10.13	9.04	2.13	0.0031	VPS8	vacuolar protein sorting 8 homolog (S. cerevisiae)
TC0700011797.hg.1	9.46	8.2	2.39	0.0031	SAMD9L	sterile alpha motif domain containing 9-like
TSUnmapped00000103.hg.1	12	10.9	2.14	0.0031	MLXIP	MLX interacting protein
TC1500008511.hg.1	12.52	11.34	2.26	0.0031	LRRC28	leucine rich repeat containing 28
TC1900006977.hg.1	10.33	13.93	-12.13	0.0032	ICAM1	intercellular adhesion molecule 1
TC1100007818.hg.1	8.07	10.15	-4.23	0.0032	DAGLA	diacylglycerol lipase, alpha
TC0200007998.hg.1	9.86	8.74	2.17	0.0032	ZNF638	zinc finger protein 638
TC0X00007493.hg.1	3.57	4.65	-2.11	0.0032	AR	androgen receptor
TC0100015049.hg.1	9.51	8.01	2.82	0.0032	FRRS1	ferric-chelate reductase 1
TC1700010686.hg.1	10.96	9.67	2.44	0.0032	JUP	junction plakoglobin
TC1200012702.hg.1	7.88	9	-2.17	0.0032	FICD	FIC domain containing
TC0300007748.hg.1	9.69	11.63	-3.85	0.0032	MITF	microphthalmia-associated transcription factor
TC0900007115.hg.1	11.05	12.46	-2.67	0.0033	GLIPR2	GLI pathogenesis-related 2
TC1100010987.hg.1	11.96	13.81	-3.59	0.0033	FABP5	fatty acid binding protein 5 (psoriasis-associated)
TC1700006612.hg.1	7.52	6.44	2.11	0.0033	CYB5D2	Transcript Identified by AceView, Entrez Gene ID(s) 124936
TC1000008385.hg.1	5.71	7.23	-2.87	0.0033	STAMBPL1	STAM binding protein-like 1
TC0700013382.hg.1	9.77	8.69	2.11	0.0033	KCTD7	potassium channel tetramerization domain containing 7
TC0900008314.hg.1	6.09	7.25	-2.23	0.0034	FSD1L	fibronectin type III and SPRY domain containing 1-like
TC1200008703.hg.1	6.32	7.66	-2.54	0.0034	C12orf45	chromosome 12 open reading frame 45
TC0900006473.hg.1	9.15	7.84	2.47	0.0034	SMARCA2	SWI/SNF related, matrix associated, actin dependent regulator of chromatin, subfamily a, member 2
TC0500013336.hg.1	13.43	12.15	2.41	0.0034	SSBP2	single-stranded DNA binding protein 2
TC1400009649.hg.1	12.14	13.62	-2.79	0.0035	NUMB	numb homolog (Drosophila)
TC1200012655.hg.1	8.33	7.21	2.17	0.0035	HELB	helicase (DNA) B
TC0700008617.hg.1	7.49	9.12	-3.1	0.0035	SH2B2	SH2B adaptor protein 2
TC1000012475.hg.1	8.22	6.66	2.96	0.0036	FFAR4	free fatty acid receptor 4
TC0100018310.hg.1	14.84	13.79	2.07	0.0036	FCGR2B	Fc fragment of IgG, low affinity IIb, receptor (CD32)
TC1200011812.hg.1	4.92	6.44	-2.85	0.0037	CRY1	cryptochrome circadian clock 1
TC1500007695.hg.1	7.61	12.33	-26.33	0.0037	PAQR5	progestin and adipoQ receptor family member V
TC2100007205.hg.1	9.94	8.65	2.45	0.0037	MX2	MX dynamin-like GTPase 2
TC1400009395.hg.1	11.28	10.22	2.09	0.0037	SGPP1	sphingosine-1-phosphate phosphatase 1
TC0900008109.hg.1	4.79	6.04	-2.37	0.0037	HABP4	hyaluronan binding protein 4
TC0600014361.hg.1	7.06	8.13	-2.09	0.0037	CNKSR3	CNKSR family member 3
TC1200012708.hg.1	13.94	12.03	3.74	0.0038	OAS1	2-5-oligoadenylate synthetase 1
TC1700008757.hg.1	7.67	5.33	5.06	0.0038	MAP2K6	mitogen-activated protein kinase kinase 6
TC0500009072.hg.1	5.79	6.94	-2.22	0.0038	PPARGC1B	peroxisome proliferator-activated receptor gamma, coactivator 1 beta
TC1100007805.hg.1	6.1	7.15	-2.07	0.0038	TMEM216	transmembrane protein 216
TSUnmapped00000713.hg.1	9.07	7.89	2.27	0.0038	FMN1	formin 1
TC0600013119.hg.1	4.47	3.46	2.01	0.0038	SOGA3; KIAA0408	SOGA family member 3; KIAA0408
TC1200007647.hg.1	7.76	8.82	-2.1	0.0038	ACVR1B	activin A receptor type IB
TC0300007466.hg.1	11.42	13.28	-3.63	0.0038	ALAS1	5-aminolevulinate synthase 1
TC1100013042.hg.1	7.55	8.71	-2.23	0.0038	SSSCA1	Sjogren syndrome/scleroderma autoantigen 1
TC0700013441.hg.1	9.71	10.72	-2.01	0.0039	IFRD1	interferon-related developmental regulator 1
TSUnmapped00000463.hg.1	6.29	7.48	-2.29	0.0039	RPS25	ribosomal protein S25
TC0500012826.hg.1	9.11	10.93	-3.54	0.004	SH3PXD2B	SH3 and PX domains 2B
TC0700011785.hg.1	8.63	9.81	-2.26	0.004	CDK6	cyclin-dependent kinase 6
TC1700010979.hg.1	12.61	11.59	2.03	0.004	CBX1	chromobox homolog 1
TC1600011387.hg.1	11.87	13.14	-2.41	0.004	STX4	syntaxin 4
TC0300009661.hg.1	13.16	11.86	2.46	0.004	B3GNT5	UDP-GlcNAc:betaGal beta-1,3-N-acetylglucosaminyltransferase 5
TC1100006966.hg.1	7.37	9.68	-4.95	0.004	NCR3LG1	natural killer cell cytotoxicity receptor 3 ligand 1
TC1800007508.hg.1	7.47	8.89	-2.68	0.004	TNFRSF11A	Transcript Identified by AceView, Entrez Gene ID(s) 8792
TC1800007431.hg.1	9.67	12.21	-5.81	0.0041	MALT1	MALT1 paracaspase
TC1400010784.hg.1	5.23	6.34	-2.16	0.0041	SYNE3	spectrin repeat containing, nuclear envelope family member 3
TC0500007122.hg.1	9.82	11.16	-2.52	0.0041	BRIX1	BRX1, biogenesis of ribosomes
TC1800007805.hg.1	5.47	6.52	-2.07	0.0041	NFATC1	nuclear factor of activated T-cells, cytoplasmic, calcineurin-dependent 1
TC0600009712.hg.1	14.68	13.29	2.62	0.0041	UTRN	utrophin
TC1700011917.hg.1	8.86	9.89	-2.04	0.0041	USP36	ubiquitin specific peptidase 36
TC0800008330.hg.1	7.14	8.25	-2.15	0.0041	POP1	POP1 homolog, ribonuclease P/MRP subunit
TC2200009272.hg.1	10.56	9.42	2.2	0.0042	APOBEC3D	apolipoprotein B mRNA editing enzyme, catalytic polypeptide-like 3D
TC1700007642.hg.1	3.78	4.88	-2.14	0.0042	MRM1	mitochondrial rRNA methyltransferase 1
TC0200012652.hg.1	8.82	9.82	-2	0.0042	PNPT1	polyribonucleotide nucleotidyltransferase 1
TC0500007778.hg.1	7.33	8.46	-2.19	0.0042	UTP15	UTP15, U3 small nucleolar ribonucleoprotein, homolog (S. cerevisiae)
TC0100011382.hg.1	3.52	5.54	-4.05	0.0042	DYRK3	dual specificity tyrosine-(Y)-phosphorylation regulated kinase 3
TC0600008120.hg.1	9.94	11.69	-3.37	0.0042	TMEM63B	transmembrane protein 63B
TC0300009706.hg.1	8.56	9.65	-2.12	0.0043	POLR2H	polymerase (RNA) II (DNA directed) polypeptide H
TC0800012307.hg.1	6.32	7.59	-2.42	0.0043	RRS1	ribosome biogenesis regulator homolog
TC1700012193.hg.1	10.76	11.93	-2.24	0.0043	NDEL1	nudE neurodevelopment protein 1-like 1
TC0100014210.hg.1	8.38	9.38	-2.01	0.0044	COA7	cytochrome c oxidase assembly factor 7 (putative)
TC1200008873.hg.1	10.94	12.47	-2.89	0.0044	SH2B3	SH2B adaptor protein 3
TC1400007975.hg.1	7.26	6.18	2.11	0.0045	C14orf159	chromosome 14 open reading frame 159
TC2200008741.hg.1	7.69	9.39	-3.25	0.0045	PDGFB	platelet-derived growth factor beta polypeptide
TC0X00008235.hg.1	4.4	6.81	-5.31	0.0045	LONRF3	LON peptidase N-terminal domain and ring finger 3
TC1000007081.hg.1	7.07	8.18	-2.16	0.0045	PDSS1	prenyl (decaprenyl) diphosphate synthase, subunit 1
TC1900008420.hg.1	4.74	5.95	-2.31	0.0045	DHX34	DEAH (Asp-Glu-Ala-His) box polypeptide 34
TC0100007574.hg.1	10.73	9.26	2.76	0.0045	EPB41	erythrocyte membrane protein band 4.1
TC1600006888.hg.1	8.59	6.57	4.04	0.0045	CIITA	class II, major histocompatibility complex, transactivator
TC2000007202.hg.1	10.17	9.15	2.03	0.0046	ACSS2	acyl-CoA synthetase short-chain family member 2
TC1200011313.hg.1	6.1	7.74	-3.12	0.0046	NAP1L1	Memczak2013 ALT_ACCEPTOR, ALT_DONOR, coding, INTERNAL, intronic best transcript NM_139207
TC0X00007112.hg.1	8.46	9.6	-2.21	0.0046	CHST7	carbohydrate (N-acetylglucosamine 6-O) sulfotransferase 7
TC2000006864.hg.1	5.82	7.17	-2.56	0.0046	RIN2	Transcript Identified by AceView, Entrez Gene ID(s) 54453
TC0900006564.hg.1	10.65	9.59	2.09	0.0046	RIC1	RIC1 homolog, RAB6A GEF complex partner 1
TC2200007655.hg.1	6.84	5.64	2.3	0.0047	PPARA	peroxisome proliferator-activated receptor alpha
TC1000006464.hg.1	7.91	9.38	-2.77	0.0047	GTPBP4	GTP binding protein 4
TC0900007977.hg.1	9.97	11.07	-2.15	0.0047	CARD19	caspase recruitment domain family, member 19
TC1700010195.hg.1	10.14	8.94	2.3	0.0047	SLC46A1	solute carrier family 46 (folate transporter), member 1
TC0800008783.hg.1	11.75	12.99	-2.36	0.0048	SQLE	squalene epoxidase
TC0100018286.hg.1	9.85	8.84	2.02	0.0048	NBPF19	neuroblastoma breakpoint family, member 19
TC0100016000.hg.1	11.6	13.03	-2.7	0.0048	MEF2D	myocyte enhancer factor 2D
TC1600008657.hg.1	11.02	12.1	-2.12	0.0048	USP10	ubiquitin specific peptidase 10
TC0100011200.hg.1	9.84	11	-2.23	0.0048	TIMM17A	translocase of inner mitochondrial membrane 17 homolog A (yeast)
TC2200008829.hg.1	8.88	10.05	-2.25	0.0048	POLR3H	polymerase (RNA) III (DNA directed) polypeptide H (22.9kD)
TC0100016016.hg.1	7.38	8.49	-2.17	0.0048	NES	nestin
TC0900008441.hg.1	7.9	9.1	-2.29	0.0048	UGCG	UDP-glucose ceramide glucosyltransferase
TC0400010770.hg.1	8.28	9.63	-2.54	0.0049	PPAT	phosphoribosyl pyrophosphate amidotransferase
TC0100008271.hg.1	9.18	10.24	-2.08	0.0049	RNF11	ring finger protein 11
TC0600014248.hg.1	6.4	5.28	2.17	0.005	HIST1H2BB	histone cluster 1, H2bb
TC1800007518.hg.1	7.57	8.75	-2.26	0.0051	ZCCHC2	zinc finger, CCHC domain containing 2
TC2000006688.hg.1	5.04	4.01	2.05	0.0051	SNAP25	synaptosome associated protein 25kDa
TC1700010358.hg.1	6.45	7.57	-2.16	0.0051	MYO1D	myosin ID
TC1100012166.hg.1	9.5	8.49	2.01	0.0051	CASP5	caspase 5
TC0900010386.hg.1	11.37	12.59	-2.33	0.0052	TMEM2	transmembrane protein 2
TC0100015803.hg.1	11.82	10.58	2.37	0.0053	TDRKH	tudor and KH domain containing
TC1200009196.hg.1	9.35	8.33	2.03	0.0053	MLXIP	MLX interacting protein
TC0100013441.hg.1	9.3	10.41	-2.15	0.0053	FGR	FGR proto-oncogene, Src family tyrosine kinase
TC0200016717.hg.1	10.11	11.54	-2.7	0.0053	TBC1D8	TBC1 domain family, member 8 (with GRAM domain)
TC0X00009637.hg.1	7.9	9.51	-3.05	0.0054	PIM2	Pim-2 proto-oncogene, serine/threonine kinase
TC0100010514.hg.1	12.02	10.74	2.42	0.0054	MPZL1	myelin protein zero-like 1
TC1200010690.hg.1	7.21	8.51	-2.46	0.0054	CSRNP2	cysteine-serine-rich nuclear protein 2
TC1000008875.hg.1	8.8	7.54	2.39	0.0055	ADD3	adducin 3 (gamma)
TC1200008686.hg.1	5.55	7.11	-2.94	0.0055	CHST11	Transcript Identified by AceView, Entrez Gene ID(s) 50515
TSUnmapped00000085.hg.1	3.95	4.98	-2.04	0.0055	CCDC84	coiled-coil domain containing 84
TSUnmapped00000531.hg.1	8.68	9.87	-2.29	0.0056	RASA3	RAS p21 protein activator 3
TSUnmapped00000654.hg.1	4.82	3.74	2.12	0.0056	FMN1	formin 1
TC1900007400.hg.1	7.22	8.71	-2.8	0.0057	KLHL26	kelch-like family member 26
TC0700010989.hg.1	12.15	13.6	-2.73	0.0057	TNS3	tensin 3
TC0100012496.hg.1	12.16	10.85	2.48	0.0057	NADK	NAD kinase
TC0400012375.hg.1	9.19	8.16	2.04	0.0057	CBR4	carbonyl reductase 4
TC2000008037.hg.1	7.85	9.08	-2.35	0.0057	SLC17A9	solute carrier family 17 (vesicular nucleotide transporter), member 9
TC1600011483.hg.1	12.66	13.86	-2.3	0.0057	LITAF	lipopolysaccharide-induced TNF factor
TC1000011469.hg.1	6.67	7.67	-2.01	0.0058	NOC3L	NOC3-like DNA replication regulator
TC2000007682.hg.1	8.71	10.15	-2.71	0.0058	CEBPB	CCAAT/enhancer binding protein (C/EBP), beta
TC2000007859.hg.1	9.75	10.98	-2.34	0.0059	RBM38	RNA binding motif protein 38
TC0200015463.hg.1	7.86	8.96	-2.14	0.0059	WDR12	WD repeat domain 12
TC0300014092.hg.1	6.42	10.05	-12.43	0.0059	TM4SF19-TCTEX1D2	TM4SF19-TCTEX1D2 readthrough (NMD candidate)
TC0300013816.hg.1	6.49	5.41	2.11	0.006	FAM198A	family with sequence similarity 198, member A
TC0700009082.hg.1	6.34	4.78	2.93	0.006	SMO	smoothened, frizzled class receptor
TC1600006941.hg.1	10.06	8.93	2.18	0.006	SNX29	sorting nexin 29
TC0100008308.hg.1	4.73	6.06	-2.51	0.0061	ZFYVE9	zinc finger, FYVE domain containing 9
TC0600008027.hg.1	6.93	8.06	-2.19	0.0061	BYSL	bystin-like
TC0800010081.hg.1	7.32	8.6	-2.42	0.0061	RNF122	ring finger protein 122
TC1900009588.hg.1	10.05	11.1	-2.07	0.0061	ZNF121	zinc finger protein 121
TC0200016224.hg.1	3.88	5.49	-3.04	0.0061	PER2	period circadian clock 2
TC1200010917.hg.1	7.96	6.74	2.32	0.0062	TIMELESS	timeless circadian clock
TC0200009955.hg.1	11.84	9.77	4.2	0.0062	CYBRD1	cytochrome b reductase 1
TC0300011988.hg.1	5.03	3.39	3.11	0.0063	GCSAM	germinal center-associated, signaling and motility
TC1700010562.hg.1	5.11	3.91	2.3	0.0063	ARL5C	ADP-ribosylation factor like GTPase 5C
TC1000008942.hg.1	4.66	5.77	-2.15	0.0063	TCF7L2	transcription factor 7-like 2 (T-cell specific, HMG-box)
TC0600013409.hg.1	5.07	8.14	-8.42	0.0064	HIVEP2	human immunodeficiency virus type I enhancer binding protein 2
TC1100013015.hg.1	13.3	12.2	2.14	0.0064	MS4A14	membrane-spanning 4-domains, subfamily A, member 14
TC0600012871.hg.1	6.28	7.38	-2.14	0.0064	TRAF3IP2	TRAF3 interacting protein 2
TC0400011429.hg.1	9.77	12.5	-6.6	0.0064	DDIT4L	DNA-damage-inducible transcript 4-like
TC0600012801.hg.1	11.14	10.09	2.08	0.0064	SESN1	sestrin 1
TC0400007276.hg.1	10.24	11.32	-2.11	0.0064	KLHL5	kelch-like family member 5
TC1100011190.hg.1	8.58	10.8	-4.65	0.0064	EHD1	EH domain containing 1
TC0100010243.hg.1	7.05	5.91	2.21	0.0065	PYHIN1	pyrin and HIN domain family, member 1
TC0200015894.hg.1	7.09	8.21	-2.18	0.0065	DOCK10	Transcript Identified by AceView, Entrez Gene ID(s) 55619
TC1200010899.hg.1	5.18	6.22	-2.05	0.0066	MYL6	Memczak2013 ANTISENSE, coding, INTERNAL, intronic best transcript NM_079423
TC0100011374.hg.1	10.08	11.16	-2.11	0.0066	IKBKE	inhibitor of kappa light polypeptide gene enhancer in B-cells, kinase epsilon
TSUnmapped00000640.hg.1	7.36	6.3	2.09	0.0067	FMN1	formin 1
TC0100017860.hg.1	9.78	10.97	-2.29	0.0068	HEATR1	HEAT repeat containing 1
TC1600008021.hg.1	6.94	5.39	2.92	0.0069	MMP15	matrix metallopeptidase 15 (membrane-inserted)
TC1900012001.hg.1	10.3	9.25	2.06	0.0069	FUZ	fuzzy planar cell polarity protein
TC0100018478.hg.1	11.32	10.14	2.27	0.007	NBPF10	neuroblastoma breakpoint family, member 10
TC0700010925.hg.1	8.67	9.75	-2.12	0.0071	DDX56	DEAD (Asp-Glu-Ala-Asp) box helicase 56
TC1000007878.hg.1	10.2	11.28	-2.12	0.0071	KIF1BP	KIF1 binding protein
TC1100010472.hg.1	5.77	4.75	2.04	0.0071	CCDC73	coiled-coil domain containing 73
TC2000008279.hg.1	13.08	12.04	2.06	0.0072	PCNA	proliferating cell nuclear antigen
TC0500010553.hg.1	15.36	13.75	3.05	0.0072	FYB	FYN binding protein
TC1000011904.hg.1	4.34	6.19	-3.62	0.0072	ABLIM1	actin binding LIM protein 1
TC0400011192.hg.1	7.61	6.39	2.33	0.0074	PLAC8	placenta specific 8
TC1200006888.hg.1	11.28	10.15	2.2	0.0074	CDKN1B	cyclin-dependent kinase inhibitor 1B (p27, Kip1)
TC1500006786.hg.1	5.05	6.23	-2.27	0.0075	SCG5	secretogranin V
TC0900011970.hg.1	4.51	5.62	-2.15	0.0076	QSOX2	quiescin Q6 sulfhydryl oxidase 2
TC1600006585.hg.1	5.31	4.23	2.12	0.0076	SLC9A3R2	solute carrier family 9, subfamily A (NHE3, cation proton antiporter 3), member 3 regulator 2
TC0200007886.hg.1	7.01	8.25	-2.37	0.0076	PNO1	partner of NOB1 homolog
TC0400008345.hg.1	4.26	6.35	-4.27	0.0077	SGMS2	sphingomyelin synthase 2
TC0900011676.hg.1	6.63	7.7	-2.09	0.0077	IER5L	immediate early response 5-like
TC1900007386.hg.1	7.95	9.07	-2.17	0.0077	SSBP4	single stranded DNA binding protein 4
TC0800010426.hg.1	3.87	4.88	-2.01	0.0078	FAM150A	family with sequence similarity 150, member A
TC1900008496.hg.1	8.41	9.81	-2.65	0.0079	PPP1R15A	protein phosphatase 1, regulatory subunit 15A
TSUnmapped00000486.hg.1	10.41	9.21	2.29	0.008	MLXIP	MLX interacting protein
TC1000007885.hg.1	8.01	9.22	-2.31	0.008	SRGN	Transcript Identified by AceView, Entrez Gene ID(s) 5552
TC1700008455.hg.1	10.43	9.17	2.39	0.008	YPEL2	yippee like 2
TC0400008628.hg.1	5.42	6.78	-2.57	0.008	SPRY1	sprouty RTK signaling antagonist 1
TC1000011736.hg.1	8.56	7.55	2.01	0.008	OBFC1	oligonucleotide/oligosaccharide-binding fold containing 1
TC0100010228.hg.1	7.55	9.1	-2.92	0.0081	CD1A	CD1a molecule
TC2000007820.hg.1	5.77	7.3	-2.87	0.0081	CASS4	Cas scaffolding protein family member 4
TC0100007980.hg.1	7.43	8.69	-2.4	0.0082	CTPS1	CTP synthase 1
TC0300010026.hg.1	6.43	7.51	-2.12	0.0082	FBXO45	F-box protein 45
TC1100006831.hg.1	7.67	8.93	-2.4	0.0083	ADM	adrenomedullin
TC0300014049.hg.1	5.81	7.03	-2.34	0.0083	ACAD11	acyl-CoA dehydrogenase family, member 11
TC1200010806.hg.1	9.5	8.37	2.19	0.0083	MAP3K12	mitogen-activated protein kinase kinase kinase 12
TC0100013608.hg.1	10.2	11.27	-2.1	0.0084	MARCKSL1	MARCKS-like 1
TC1000011028.hg.1	4.76	6.14	-2.59	0.0086	MYOZ1	myozenin 1
TC0X00006626.hg.1	14.41	13	2.67	0.0087	TLR8	toll-like receptor 8
TC1800006715.hg.1	10.79	9.32	2.78	0.0087	IMPA2	inositol(myo)-1(or 4)-monophosphatase 2
TC0600007060.hg.1	9.01	7.52	2.82	0.0087	MYLIP; MIR4639	myosin regulatory light chain interacting protein; microRNA 4639
TC0100018146.hg.1	5.36	6.41	-2.07	0.0088	ZNF692	zinc finger protein 692
TC1600006926.hg.1	7.59	6.36	2.35	0.0089	SNN	stannin
TC1200010407.hg.1	3.97	4.98	-2	0.0089	KIF21A	kinesin family member 21A
TC1700006751.hg.1	12.38	11.32	2.08	0.009	POLR2A	polymerase (RNA) II (DNA directed) polypeptide A, 220kDa
TC2100006854.hg.1	5.01	6.39	-2.61	0.009	MAP3K7CL	MAP3K7 C-terminal like
TC0700013355.hg.1	5.2	3.79	2.65	0.009	NME8	NME/NM23 family member 8
TC0700008003.hg.1	8.95	10.4	-2.72	0.009	CLIP2	CAP-GLY domain containing linker protein 2
TC1100010290.hg.1	11.45	10.39	2.08	0.0091	E2F8	E2F transcription factor 8
TC0100018481.hg.1	10.01	8.68	2.52	0.0091	NOTCH2NL	notch 2 N-terminal like
TC0100013902.hg.1	8.4	7.3	2.15	0.0091	SVBP	small vasohibin binding protein
TC1900008221.hg.1	7.21	8.44	-2.35	0.0092	PINLYP	phospholipase A2 inhibitor and LY6/PLAUR domain containing
TC0900010933.hg.1	8.08	6.86	2.32	0.0092	CTSV	cathepsin V
TC1700011720.hg.1	8.13	7.11	2.02	0.0093	FDXR	ferredoxin reductase
TC0400012917.hg.1	7.13	8.15	-2.02	0.0093	ARAP2	ArfGAP with RhoGAP domain, ankyrin repeat and PH domain 2
TC0200011130.hg.1	7.44	8.63	-2.28	0.0094	DGKD	diacylglycerol kinase, delta 130kDa
TC0200013750.hg.1	4.42	5.96	-2.9	0.0094	FHL2	four and a half LIM domains 2
TC0100013761.hg.1	10.71	12.06	-2.55	0.0095	FHL3	four and a half LIM domains 3
TC1300006923.hg.1	12.26	11.25	2.01	0.0095	NHLRC3	NHL repeat containing 3
TC0600011252.hg.1	5.27	4.05	2.32	0.0097	ZSCAN31	zinc finger and SCAN domain containing 31
TC0300007470.hg.1	9.31	10.41	-2.15	0.0098	PPM1M	protein phosphatase, Mg2+/Mn2+ dependent, 1M
TC1700010327.hg.1	8.8	9.88	-2.12	0.0098	COPRS	coordinator of PRMT5, differentiation stimulator
TC0600007301.hg.1	10.2	8.56	3.11	0.0099	BTN3A2	butyrophilin, subfamily 3, member A2
TC0800007866.hg.1	4.25	3.21	2.06	0.01	MCMDC2	minichromosome maintenance domain containing 2
TC0100010755.hg.1	7.48	6.19	2.43	0.01	RALGPS2	Ral GEF with PH domain and SH3 binding motif 2
TC1700011364.hg.1	7.66	6.38	2.44	0.01	BRIP1	BRCA1 interacting protein C-terminal helicase 1
TC0X00008054.hg.1	5.24	6.81	-2.98	0.01	RNF128	ring finger protein 128, E3 ubiquitin protein ligase
TC1600006652.hg.1	9.16	10.44	-2.42	0.0101	TNFRSF12A	tumor necrosis factor receptor superfamily, member 12A
TC0300013344.hg.1	9.24	10.58	-2.52	0.0101	KLHL6	kelch-like family member 6
TC0300010775.hg.1	13.62	11.65	3.91	0.0101	CX3CR1	chemokine (C-X3-C motif) receptor 1
TC0900007807.hg.1	14.3	13.22	2.12	0.0102	DAPK1	death-associated protein kinase 1
TC1700009528.hg.1	13.91	15.1	-2.29	0.0102	CXCL16	chemokine (C-X-C motif) ligand 16
TC0700012849.hg.1	12.88	14.86	-3.95	0.0103	CLEC5A	C-type lectin domain family 5, member A
TC1900009254.hg.1	11.36	12.37	-2.01	0.0103	SGTA	small glutamine-rich tetratricopeptide repeat (TPR)-containing, alpha
TC0100006812.hg.1	8.97	9.98	-2.02	0.0103	KIF1B	kinesin family member 1B
TC1500010733.hg.1	8.68	10.09	-2.65	0.0103	C15orf48; MIR147B	chromosome 15 open reading frame 48; microRNA 147b
TC1300008388.hg.1	6.71	7.75	-2.06	0.0103	MTMR6	Transcript Identified by AceView, Entrez Gene ID(s) 9107
TC0200012809.hg.1	11.85	10.83	2.03	0.0104	PELI1	pellino E3 ubiquitin protein ligase 1
TSUnmapped00000594.hg.1	5.74	6.86	-2.17	0.0104	GREM1	gremlin 1, DAN family BMP antagonist [Source:HGNC Symbol;Acc:HGNC:2001]
TC1200011727.hg.1	13.44	10.67	6.82	0.0104	IGF1	insulin-like growth factor 1 (somatomedin C)
TC2200008610.hg.1	8.85	7.81	2.05	0.0105	FOXRED2	FAD-dependent oxidoreductase domain containing 2
TC1200007844.hg.1	9.05	7.85	2.29	0.0105	RBMS2	RNA binding motif, single stranded interacting protein 2
TC1700009809.hg.1	7.19	9.79	-6.04	0.0105	HS3ST3A1	heparan sulfate (glucosamine) 3-O-sulfotransferase 3A1
TC1100012131.hg.1	11.37	13.01	-3.14	0.0107	MMP1	matrix metallopeptidase 1
TC0300008467.hg.1	11.61	13.1	-2.81	0.0108	ARHGAP31	Rho GTPase activating protein 31
TC1000008400.hg.1	11.69	10.19	2.83	0.0111	IFIT1	interferon-induced protein with tetratricopeptide repeats 1
TC1900011464.hg.1	11.33	10.33	2.01	0.0111	TMEM150B	transmembrane protein 150B
TC1100006760.hg.1	9.3	8.24	2.08	0.0112	PPFIBP2	PTPRF interacting protein, binding protein 2 (liprin beta 2)
TC1400010758.hg.1	4.71	3.12	3.01	0.0113	CCDC175	coiled-coil domain containing 175
TC1200007859.hg.1	7.48	9.14	-3.15	0.0113	NAB2	NGFI-A binding protein 2 (EGR1 binding protein 2)
TC1000007990.hg.1	9.23	10.54	-2.48	0.0113	DDIT4	DNA damage inducible transcript 4
TC0700011842.hg.1	13	11.38	3.05	0.0114	PDK4	pyruvate dehydrogenase kinase, isozyme 4
TC0100018068.hg.1	8.06	9.28	-2.33	0.0114	TFB2M	transcription factor B2, mitochondrial
TC0500012017.hg.1	7.34	6	2.53	0.0115	IRF1	interferon regulatory factor 1
TC0100016145.hg.1	7.73	6.57	2.24	0.0118	CD244	CD244 molecule, natural killer cell receptor 2B4
TC1700006464.hg.1	3.4	4.75	-2.55	0.0119	FAM57A	family with sequence similarity 57, member A
TC0300009673.hg.1	11.41	10.36	2.08	0.012	KLHL24	kelch-like family member 24
TC0100018565.hg.1	4.57	3.42	2.22	0.0121	AGT	angiotensinogen (serpin peptidase inhibitor, clade A, member 8)
TC1700007558.hg.1	8.23	9.73	-2.82	0.0121	CCL7	chemokine (C-C motif) ligand 7
TC1900009966.hg.1	4.99	6.53	-2.91	0.0122	PLVAP	plasmalemma vesicle associated protein
TC0700011156.hg.1	4.73	3.68	2.06	0.0123	SEPT14	septin 14
TC1200008726.hg.1	9.93	8.58	2.54	0.0123	TCP11L2	t-complex 11, testis-specific-like 2
TC1400006652.hg.1	8.97	7.84	2.19	0.0125	ABHD4	abhydrolase domain containing 4
TC0X00006625.hg.1	13.75	12.05	3.26	0.0126	TLR7	toll-like receptor 7
TC2000006721.hg.1	9.06	10.29	-2.34	0.0127	BTBD3	BTB (POZ) domain containing 3
TSUnmapped00000289.hg.1	4.49	5.73	-2.37	0.0127	RPL7A	ribosomal protein L7a
TC0300012243.hg.1	6.06	7.79	-3.33	0.0128	SLC12A8	solute carrier family 12, member 8
TSUnmapped00000742.hg.1	6.72	5.72	2	0.0128	ZNF852	zinc finger protein 852
TC0800006978.hg.1	7.07	8.58	-2.84	0.013	POLR3D	polymerase (RNA) III (DNA directed) polypeptide D, 44kDa
TSUnmapped00000280.hg.1	5.9	6.92	-2.02	0.0133	SURF6	surfeit 6
TC1900008058.hg.1	6.11	7.27	-2.24	0.0133	PLEKHG2	pleckstrin homology domain containing, family G (with RhoGef domain) member 2
TC1100012002.hg.1	10.89	9.78	2.15	0.0133	MRE11A	MRE11 homolog A, double strand break repair nuclease
TC1400008857.hg.1	5.94	4.59	2.54	0.0133	GPR33	G protein-coupled receptor 33 (gene/pseudogene)
TC1000008193.hg.1	10.82	12.56	-3.34	0.0134	PPIF	peptidylprolyl isomerase F
TC0400012947.hg.1	12.27	13.37	-2.14	0.0137	GPRIN3	GPRIN family member 3
TC1300009293.hg.1	10.35	9.31	2.05	0.0138	MYCBP2	MYC binding protein 2, E3 ubiquitin protein ligase
TC0X00008232.hg.1	3.43	4.7	-2.42	0.014	ZCCHC12	zinc finger, CCHC domain containing 12
TC0500007925.hg.1	5.73	4.6	2.2	0.014	RASGRF2	Ras protein-specific guanine nucleotide-releasing factor 2
TC1000008712.hg.1	6.26	7.75	-2.81	0.0141	PPRC1	peroxisome proliferator-activated receptor gamma, coactivator-related 1
TC0500007881.hg.1	7.21	6.2	2.01	0.0141	JMY	junction mediating and regulatory protein, p53 cofactor
TC0300012212.hg.1	5.86	4.83	2.04	0.0142	MYLK	myosin light chain kinase
TC0600013519.hg.1	11.01	9.77	2.35	0.0142	ZC3H12D	zinc finger CCCH-type containing 12D
TC1700011746.hg.1	11.49	12.56	-2.1	0.0142	SLC25A19	solute carrier family 25 (mitochondrial thiamine pyrophosphate carrier), member 19
TC0600009076.hg.1	6.83	5.74	2.13	0.0143	ARMC2	armadillo repeat containing 2
TSUnmapped00000772.hg.1	6.13	5.1	2.03	0.0143	FMN1	formin 1
TC1200011993.hg.1	13.01	12	2.01	0.0146	SLC8B1	solute carrier family 8 (sodium/lithium/calcium exchanger), member B1
TC1200009892.hg.1	12.95	14.98	-4.09	0.0147	OLR1	oxidized low density lipoprotein (lectin-like) receptor 1
TC0700011508.hg.1	8.74	10.04	-2.46	0.0151	LIMK1	Memczak2013 ANTISENSE, CDS, coding, INTERNAL best transcript NM_001204426
TC1700007617.hg.1	7.34	8.84	-2.83	0.0153	CCL18	chemokine (C-C motif) ligand 18
TC0100013713.hg.1	10.67	12.15	-2.79	0.0154	STK40	serine/threonine kinase 40
TC1200012016.hg.1	9.35	8.07	2.43	0.0155	TBX3	T-box 3
TC1500007355.hg.1	9.87	11.53	-3.16	0.0156	AQP9	aquaporin 9
TC0100018220.hg.1	5	4	2.01	0.0157	CCDC30	coiled-coil domain containing 30
TC2200008710.hg.1	10.29	11.61	-2.49	0.0157	JOSD1	Josephin domain containing 1
TC0X00008712.hg.1	3.57	6.17	-6.06	0.0159	MAMLD1	mastermind-like domain containing 1
TC0X00006709.hg.1	6.71	5.07	3.13	0.0159	NHS	Nance-Horan syndrome (congenital cataracts and dental anomalies)
TC0X00009581.hg.1	8.86	9.92	-2.08	0.0163	ELK1	ELK1, member of ETS oncogene family
TC0600014109.hg.1	7.44	6.38	2.09	0.0163	PSMB8-AS1	PSMB8 antisense RNA 1 (head to head)
TC0200008911.hg.1	7.12	6.02	2.14	0.0164	ZC3H6	zinc finger CCCH-type containing 6
TC0300012048.hg.1	6.86	5.56	2.46	0.0165	ZBTB20; MIR568	zinc finger and BTB domain containing 20; microRNA 568
TC1100009962.hg.1	8.41	9.42	-2.01	0.0166	FAM160A2	family with sequence similarity 160, member A2
TC0200007421.hg.1	4.35	3.31	2.07	0.0167	CAMKMT	Memczak2013 ALT_ACCEPTOR, ALT_DONOR, coding, INTERNAL, intronic best transcript NM_024766
TC1600009742.hg.1	4.34	5.39	-2.07	0.0168	EARS2	glutamyl-tRNA synthetase 2, mitochondrial
TC0300013108.hg.1	8.1	7.1	2	0.0169	TNIK	TRAF2 and NCK interacting kinase
TC1200011845.hg.1	14.26	13.25	2.01	0.0172	SELPLG	selectin P ligand
TC0700006844.hg.1	5.49	7.05	-2.96	0.0173	ITGB8	integrin beta 8
TC0100018349.hg.1	5.69	7.38	-3.23	0.0173	CNIH3	cornichon family AMPA receptor auxiliary protein 3
TC2000009218.hg.1	7.28	9.59	-4.97	0.0174	SDC4	syndecan 4
TSUnmapped00000704.hg.1	5.17	4.03	2.2	0.0176	FMN1	formin 1
TC2000006642.hg.1	8.03	9.28	-2.37	0.0184	BMP2	bone morphogenetic protein 2
TC1200011608.hg.1	10.01	11.11	-2.15	0.0186	CDK17	cyclin-dependent kinase 17
TC2100007208.hg.1	12.75	11.69	2.08	0.0187	MX1	MX dynamin-like GTPase 1
TC1100006680.hg.1	4.57	2.95	3.08	0.0189	OR52E1	olfactory receptor, family 52, subfamily E, member 1 (gene/pseudogene)
TC0200010264.hg.1	5.06	6.93	-3.66	0.019	MFSD6	major facilitator superfamily domain containing 6
TC1200010655.hg.1	10.31	12.03	-3.28	0.019	LIMA1	LIM domain and actin binding 1
TC0100015079.hg.1	6.62	5.54	2.11	0.0191	EXTL2	exostosin-like glycosyltransferase 2
TC1500008554.hg.1	7.97	6.94	2.05	0.0192	LRRK1	leucine-rich repeat kinase 1
TC0600014300.hg.1	14.34	13.15	2.29	0.0192	GCLC	glutamate-cysteine ligase, catalytic subunit
TC0600008109.hg.1	7.97	9.87	-3.75	0.0195	VEGFA	vascular endothelial growth factor A
TC1700006946.hg.1	7.91	10.67	-6.74	0.0197	HS3ST3B1	heparan sulfate (glucosamine) 3-O-sulfotransferase 3B1
TC0800011395.hg.1	7.56	8.6	-2.06	0.0199	LRP12	LDL receptor related protein 12
TC0900010366.hg.1	7.87	9.12	-2.37	0.0201	KLF9	Kruppel-like factor 9
TC1700011476.hg.1	13.91	15.08	-2.25	0.0203	GNA13	guanine nucleotide binding protein (G protein), alpha 13
TC0600009459.hg.1	4	5.55	-2.93	0.0204	ENPP1	ectonucleotide pyrophosphatase/phosphodiesterase 1
TC2000008515.hg.1	6.72	7.99	-2.42	0.0206	SNX5	Jeck2013 ALT_DONOR, coding, INTERNAL, intronic best transcript NM_152227
TC1500008175.hg.1	6.96	8.28	-2.5	0.0207	PDE8A	phosphodiesterase 8A
TC1700006524.hg.1	9.65	7.96	3.23	0.0208	SERPINF1	serpin peptidase inhibitor, clade F (alpha-2 antiplasmin, pigment epithelium derived factor), member 1
TC0400010024.hg.1	8.02	6.81	2.3	0.0208	SLC2A9	solute carrier family 2 (facilitated glucose transporter), member 9
TC0X00008073.hg.1	12.26	13.31	-2.07	0.0212	PRPS1	phosphoribosyl pyrophosphate synthetase 1
TC0600012631.hg.1	10.27	9.14	2.19	0.0212	MMS22L	MMS22-like, DNA repair protein
TC1600010756.hg.1	5.71	7.01	-2.46	0.0213	ST3GAL2	ST3 beta-galactoside alpha-2,3-sialyltransferase 2
TC0100015483.hg.1	12.41	11.18	2.34	0.0214	NOTCH2	notch 2
TC0500008777.hg.1	12.24	11.17	2.1	0.0216	KIF20A	kinesin family member 20A
TC1700012189.hg.1	7.71	8.75	-2.05	0.0218	SENP3	SUMO1/sentrin/SMT3 specific peptidase 3
TC1500008757.hg.1	7.22	8.23	-2.02	0.022	ATP10A	ATPase, class V, type 10A
TC0900011393.hg.1	7.16	9.95	-6.93	0.0221	TRAF1	TNF receptor-associated factor 1
TC1800008891.hg.1	7.18	8.31	-2.19	0.0221	BCL2	B-cell CLL/lymphoma 2
TC0200016679.hg.1	5.41	6.62	-2.31	0.0222	SERTAD2	SERTA domain containing 2
TC0100018479.hg.1	12.58	11.4	2.26	0.0229	NOTCH2NL	notch 2 N-terminal like
TC0300011247.hg.1	9.08	11.46	-5.23	0.0233	WNT5A	wingless-type MMTV integration site family, member 5A
TC1500007196.hg.1	5.2	6.32	-2.17	0.0235	SLC27A2	solute carrier family 27 (fatty acid transporter), member 2
TC1100011797.hg.1	6.4	5.14	2.39	0.0237	RAB30	RAB30, member RAS oncogene family
TC1700010679.hg.1	4.84	3.8	2.06	0.0238	KRT9	keratin 9, type I
TC0600006873.hg.1	5.09	8.47	-10.37	0.0241	BMP6	bone morphogenetic protein 6
TC1900007173.hg.1	11.43	12.51	-2.12	0.0243	ADGRE5	adhesion G protein-coupled receptor E5
TC0900011072.hg.1	13.28	12.16	2.18	0.0244	ABCA1	ATP binding cassette subfamily A member 1
TC0800010783.hg.1	6.32	8.99	-6.37	0.0244	MSC	musculin
TC0100008816.hg.1	7.51	6.47	2.05	0.0247	IFI44	interferon-induced protein 44
TC0100013561.hg.1	9.12	11.3	-4.55	0.025	FABP3	fatty acid binding protein 3, muscle and heart
TC1400007259.hg.1	5.83	4.17	3.15	0.026	PELI2	pellino E3 ubiquitin protein ligase family member 2
TC1200010182.hg.1	10.97	12.42	-2.73	0.0263	BHLHE41	basic helix-loop-helix family, member e41
TC1200008057.hg.1	12.2	11.2	2.01	0.0265	IRAK3; MIR6502	interleukin 1 receptor associated kinase 3; microRNA 6502
TC0900011778.hg.1	9.96	11.06	-2.14	0.0268	RAPGEF1	Rap guanine nucleotide exchange factor 1
TC0100018439.hg.1	9.67	11.03	-2.57	0.0268	TAL1	T-cell acute lymphocytic leukemia 1
TC0200007237.hg.1	10.63	12.11	-2.78	0.0274	CRIM1	cysteine rich transmembrane BMP regulator 1 (chordin-like)
TC1200011982.hg.1	8.19	9.46	-2.41	0.0279	RASAL1	RAS protein activator like 1 (GAP1 like)
TC0200015246.hg.1	7.19	9.55	-5.15	0.0279	STAT4	signal transducer and activator of transcription 4
TC1300009933.hg.1	11.72	12.91	-2.28	0.0282	RASA3	RAS p21 protein activator 3
TC0700012760.hg.1	7.8	8.89	-2.13	0.0283	ZC3HAV1L	zinc finger CCCH-type, antiviral 1-like
TC0700013584.hg.1	9.55	10.81	-2.4	0.0286	CYP51A1	cytochrome P450, family 51, subfamily A, polypeptide 1
TC0300014082.hg.1	11.62	13.61	-3.98	0.0288	ETV5	ets variant 5
TC1100007844.hg.1	6.28	5.01	2.43	0.0292	ASRGL1	asparaginase like 1
TC0300007367.hg.1	5.2	4.11	2.12	0.0292	KLHDC8B	kelch domain containing 8B
TC1900011852.hg.1	5.18	6.28	-2.14	0.0298	RFX2	regulatory factor X, 2 (influences HLA class II expression)
TC1200010839.hg.1	11.58	12.72	-2.2	0.0301	ITGA5	integrin alpha 5
TC0500013352.hg.1	7.42	8.68	-2.38	0.0303	MEIKIN	meiotic kinetochore factor
TC0200013311.hg.1	6.95	5.93	2.02	0.0303	REEP1	receptor accessory protein 1
TC0900011193.hg.1	4.54	5.68	-2.21	0.0304	LPAR1	Jeck2013 ALT_ACCEPTOR, ALT_DONOR, coding, INTERNAL, intronic best transcript NM_057159; Salzman2013 ALT_ACCEPTOR, ALT_DONOR, coding, INTERNAL, intronic best transcript NM_057159
TC0700006890.hg.1	4.47	5.99	-2.88	0.0307	IL6	interleukin 6
TC0700007993.hg.1	4.89	3.53	2.57	0.0309	CLDN4	claudin 4
TC1400009738.hg.1	4.26	5.39	-2.19	0.0313	TGFB3	transforming growth factor beta 3
TC2100007241.hg.1	9.19	6.33	7.25	0.0313	ABCG1	ATP binding cassette subfamily G member 1
TC0700009693.hg.1	10.48	11.56	-2.12	0.0315	AGAP3	ArfGAP with GTPase domain, ankyrin repeat and PH domain 3
TC0900011300.hg.1	5.99	8.22	-4.69	0.0316	TNFSF15	tumor necrosis factor (ligand) superfamily, member 15
TC1500006925.hg.1	9.65	12.13	-5.57	0.0322	THBS1	thrombospondin 1
TC1700010604.hg.1	6.1	5.08	2.04	0.0326	NR1D1	nuclear receptor subfamily 1, group D, member 1
TC0100009560.hg.1	11.54	10.52	2.03	0.0329	CD101	CD101 molecule
TC1700012433.hg.1	7.66	6.64	2.03	0.0331	HOXB6	homeobox B6
TC0300013733.hg.1	6.25	7.89	-3.12	0.0338	MFI2	antigen p97 (melanoma associated) identified by monoclonal antibodies 133.2 and 96.5
TC0400012949.hg.1	12.03	13.56	-2.88	0.0339	SLC39A8	solute carrier family 39 (zinc transporter), member 8
TC1000008056.hg.1	9.72	10.76	-2.05	0.0343	VCL	vinculin
TC0X00006590.hg.1	6.54	5.48	2.08	0.0356	WWC3	WWC family member 3
TC0700010075.hg.1	11.9	13.28	-2.6	0.0361	GNA12	guanine nucleotide binding protein (G protein) alpha 12
TC1100010030.hg.1	5.31	4.19	2.19	0.0368	STK33	serine/threonine kinase 33
TC1000008182.hg.1	10.97	12.3	-2.53	0.0368	ZMIZ1	zinc finger, MIZ-type containing 1
TC1200011567.hg.1	5.88	4.24	3.12	0.0368	TMCC3; MIR7844	transmembrane and coiled-coil domain family 3; microRNA 7844
TC1200012804.hg.1	9.89	8.88	2.01	0.0371	PRIM1	primase, DNA, polypeptide 1 (49kDa)
TC1300009858.hg.1	6.43	5.16	2.42	0.0373	TUBGCP3	Transcript Identified by AceView, Entrez Gene ID(s) 10426
TC1500007874.hg.1	7.35	8.43	-2.1	0.0375	C15orf39	chromosome 15 open reading frame 39
TC1000011556.hg.1	6.55	8.35	-3.47	0.0378	AVPI1	arginine vasopressin-induced 1
TC0100018285.hg.1	10.89	9.74	2.22	0.0384	NBPF19	neuroblastoma breakpoint family, member 19
TC0900007953.hg.1	8.14	7.09	2.07	0.0387	CENPP	centromere protein P
TC2100007263.hg.1	5.78	4.67	2.16	0.0394	PDE9A	phosphodiesterase 9A
TC1600009646.hg.1	7.42	8.62	-2.29	0.0396	KNOP1	lysine-rich nucleolar protein 1
TC0300013555.hg.1	8.04	9.75	-3.27	0.0401	MB21D2	Mab-21 domain containing 2
TC0500011100.hg.1	10.77	11.8	-2.05	0.0405	ZNF366	zinc finger protein 366
TC0300013751.hg.1	5.75	4.35	2.65	0.0405	BDH1	3-hydroxybutyrate dehydrogenase, type 1
TC0400012907.hg.1	6.02	7.22	-2.3	0.0408	ADGRA3	adhesion G protein-coupled receptor A3
TC0800009816.hg.1	9.34	7.74	3.03	0.0411	GFRA2	GDNF family receptor alpha 2
TC1200011767.hg.1	9.06	10.87	-3.51	0.0411	SLC41A2	solute carrier family 41 (magnesium transporter), member 2
TC1600011453.hg.1	7.11	8.42	-2.48	0.0419	TUBB3; MC1R	tubulin, beta 3 class III; melanocortin 1 receptor (alpha melanocyte stimulating hormone receptor)
TC1400006715.hg.1	10.18	8.89	2.45	0.0419	PCK2	phosphoenolpyruvate carboxykinase 2 (mitochondrial)
TC0100012167.hg.1	8.07	9.72	-3.13	0.0421	KMO	kynurenine 3-monooxygenase (kynurenine 3-hydroxylase)
TC0100011581.hg.1	11.6	10.57	2.05	0.0422	CENPF	centromere protein F
TC1000007199.hg.1	5.51	6.83	-2.49	0.0431	ZEB1	zinc finger E-box binding homeobox 1
TC0100015754.hg.1	10.02	8.98	2.05	0.0432	CTSK	cathepsin K
TC0300013949.hg.1	9.84	11.26	-2.68	0.0434	SATB1	SATB homeobox 1
TC1400009978.hg.1	4.52	6.12	-3.04	0.045	GPR68	G protein-coupled receptor 68
TC0100009837.hg.1	11.26	10.08	2.27	0.0451	PDE4DIP	phosphodiesterase 4D interacting protein
TC0100017110.hg.1	9.58	11.84	-4.78	0.0459	FCMR	Fc fragment of IgM receptor
TC1300009980.hg.1	7.28	5.82	2.76	0.0462	LMO7	LIM domain 7
TC0500013261.hg.1	8.78	7.66	2.17	0.0476	GALNT10	polypeptide N-acetylgalactosaminyltransferase 10
TC0200016115.hg.1	10.81	12.05	-2.37	0.0476	ARL4C	ADP-ribosylation factor like GTPase 4C
TC0100013757.hg.1	11.16	12.18	-2.04	0.0484	MTF1	metal-regulatory transcription factor 1
TC0300008945.hg.1	7.82	8.92	-2.13	0.0492	MRAS	muscle RAS oncogene homolog
