# Supplementary material for: C5a Activates a Pro-Inflammatory Gene Expression Profile in Human Gaucher iPSC-Derived Macrophages
Source: Int J Mol Sci. 2021 Sep 14;22(18):9912. doi: 10.3390/ijms22189912 (PMC8466165; doi:10.3390/ijms22189912)
Supplement: Supplementary file 1 [file ijms-22-09912-s001.zip › Supplemental Table S4A.xls]

## Sheet: Sheet0
Ingenuity Canonical Pathways	-log(p-value)	Ratio	Molecules
Kinetochore Metaphase Signaling Pathway	14.1	0.248	AURKB,BIRC5,BUB1,BUB1B,CCNB1,CDC20,CDCA8,CDK1,CENPA,CENPE,CENPN,CENPQ,CENPW,KIF2C,MAD2L1,NDC80,NEK2,NUF2,PLK1,PPP1R14C,PPP1R3D,PTTG1,SKA1,SPC25,TTK,ZWILCH
Molecular Mechanisms of Cancer	5.75	0.0854	ADCY3,AKT3,ARHGEF12,ARHGEF5,AURKA,BMP6,CAMK2G,CASP8,CCND1,CCNE2,CDC25C,CDK1,CDK17,CDKN2C,CHEK1,E2F8,FANCD2,FZD5,FZD6,HIF1A,ITGAL,ITGB3,ITGB6,ITGB7,ITGB8,JAK2,JAK3,LRP6,MAP3K5,MAPK10,PRKACB,PRKCH,RALA,RAPGEF1,RRAS2,SMAD3,SRC,TGFBR1
Sertoli Cell-Sertoli Cell Junction Signaling	5.58	0.112	AKT3,EPN2,GUCY1A2,GUCY1B1,ITGAL,ITGB3,ITGB6,ITGB7,ITGB8,JAM2,JUP,MAP3K5,MAPK10,NECTIN1,PRKACB,RALA,RRAS2,SPTAN1,SPTBN1,SRC,TGFBR3,TJP1,VCL
Regulation of Cellular Mechanics by Calpain Protease	5.32	0.157	CCNA1,CCNA2,CCND1,CCNE2,CDK1,ITGAL,ITGB3,ITGB6,ITGB7,ITGB8,RALA,RRAS2,SRC,VCL
Osteoarthritis Pathway	5.15	0.103	CASP1,CASP8,EPAS1,FZD5,FZD6,HIF1A,IL1R1,IL1R2,ITGAL,ITGB3,ITGB6,ITGB7,ITGB8,JAG1,MMP1,MMP12,PRKAB1,S100A8,S100A9,SDC4,SMAD3,TGFBR1,TIMP3,VEGFA
Antigen Presentation Pathway	5.01	0.231	CIITA,HLA-DMA,HLA-DPA1,HLA-DPB1,HLA-DRA,HLA-DRB1,HLA-DRB5,PSMB8,PSMB9
STAT3 Pathway	4.97	0.126	BMP6,IGF1R,IGF2R,IL1R1,IL1R2,IL7R,JAK2,KDR,MAPK10,PDGFB,RALA,RRAS2,SOCS2,SRC,TGFBR1,TGFBR3,VEGFA
Th2 Pathway	4.89	0.124	BHLHE41,CXCR4,HLA-DMA,HLA-DPA1,HLA-DPB1,HLA-DRA,HLA-DRB1,HLA-DRB5,JAG1,JAK2,JAK3,NOTCH3,STAT4,TGFBR1,TGFBR3,TIMD4,TNFSF4
Pancreatic Adenocarcinoma Signaling	4.76	0.127	AKT3,BIRC5,BRCA2,CCND1,CCNE2,E2F8,HBEGF,JAK2,JAK3,MAPK10,PLD4,RAD51,RALA,SMAD3,TGFBR1,VEGFA
Oncostatin M Signaling	4.64	0.209	EPAS1,JAK2,JAK3,MMP1,OSMR,PLAU,RALA,RRAS2,TIMP3
Inhibition of Angiogenesis by TSP1	4.58	0.235	AKT3,GUCY1A2,GUCY1B1,KDR,MAPK10,TGFBR1,THBS1,VEGFA
Mitotic Roles of Polo-Like Kinase	4.55	0.167	CCNB1,CCNB2,CDC20,CDC25C,CDK1,KIF11,KIF23,PLK1,PPP2R2B,PRC1,PTTG1
Tumor Microenvironment Pathway	4.41	0.106	AKT3,CCND1,CD44,CSF1,CXCR4,HIF1A,ITGB3,JAK2,MMP1,MMP12,MMP8,PDCD1LG2,PDGFB,PLAU,RALA,RRAS2,SLC2A3,TIAM1,VEGFA
NAD Signaling Pathway	4.33	0.113	AKT3,BMP6,CD38,H1-1,H1-2,H1-3,H2BC17,H2BU1,HIF1A,NAPRT,NT5E,PDGFB,PRKAB1,SLC12A8,SLC7A5,TPCN2,VEGFA
ATM Signaling	4.23	0.134	CCNB1,CCNB2,CDC25C,CDK1,CHEK1,FANCD2,GADD45G,MAPK10,MRE11,PPP2R2B,RAD51,SMC2,ZEB1
HIF1α Signaling	4	0.0962	AKT3,BMP6,CAMK2G,EGLN3,ELOB,HIF1A,HK3,KDR,MET,MMP1,MMP12,MMP8,PDGFB,PRKCH,RALA,RRAS2,SLC2A14,SLC2A3,SLC2A8,VEGFA
Hepatic Fibrosis Signaling Pathway	4	0.0764	AKT3,BAMBI,CACNA2D4,CACNB4,CCND1,FZD5,FZD6,HIF1A,IL1R1,IL1R2,IRS2,ITGAL,ITGB3,ITGB6,ITGB7,ITGB8,JAK2,KDR,LRP6,MAPK10,MMP1,MYLK2,PDGFB,PDK1,PRKACB,PRKCH,RALA,RRAS2,SMAD3,TGFBR1,TGFBR3,VEGFA
Macropinocytosis Signaling	3.97	0.145	CSF1,ITGB3,ITGB6,ITGB7,ITGB8,MET,PDGFB,PRKCH,RALA,RRAS2,SRC
Neuregulin Signaling	3.96	0.12	AKT3,ERRFI1,HBEGF,ITGAL,ITGB3,ITGB6,ITGB7,ITGB8,MATK,NRG1,PRKCH,RALA,RRAS2,SRC
IL-4 Signaling	3.83	0.13	AKT3,HLA-DMA,HLA-DPA1,HLA-DPB1,HLA-DRA,HLA-DRB1,HLA-DRB5,INPP5D,JAK2,JAK3,RALA,RRAS2
PD-1, PD-L1 cancer immunotherapy pathway	3.83	0.123	AKT3,CBLB,CIP2A,HLA-DMA,HLA-DPA1,HLA-DPB1,HLA-DRA,HLA-DRB1,HLA-DRB5,JAK2,JAK3,PDCD1LG2,SMAD3
Semaphorin Neuronal Repulsive Signaling Pathway	3.8	0.106	AKT3,ARHGEF12,CD44,GUCY1A2,GUCY1B1,ITGAL,ITGB3,ITGB6,ITGB7,ITGB8,NRP2,PDE4B,PLXNA2,PLXNA3,PRKACB,VCAN
Th1 and Th2 Activation Pathway	3.64	0.0988	BHLHE41,CXCR4,HLA-DMA,HLA-DPA1,HLA-DPB1,HLA-DRA,HLA-DRB1,HLA-DRB5,JAG1,JAK2,JAK3,NOTCH3,STAT4,TGFBR1,TGFBR3,TIMD4,TNFSF4
Protein Kinase A Signaling	3.62	0.0746	ADCY3,CAMK2G,CDC25C,CDKN3,CREM,DUSP1,DUSP16,EYA2,FLNB,H1-1,H1-2,H1-3,H3-3A/H3-3B,H3C3,ITPR1,MYLK2,PDE1B,PDE3A,PDE4B,PDE8A,PPP1R14C,PPP1R3D,PRKACB,PRKCH,PTPRE,PTPRG,PTPRM,PTPRN,SMAD3,TGFBR1
Epithelial Adherens Junction Signaling	3.58	0.101	AKT3,EPN2,JUP,MET,MYO10,NECTIN1,NOTCH3,PTPRM,RALA,RAPGEF1,RRAS2,SRC,TGFBR1,TGFBR3,VAV2,VCL
Estrogen-mediated S-phase Entry	3.51	0.231	CCNA1,CCNA2,CCND1,CCNE2,CDK1,E2F8
Senescence Pathway	3.5	0.0808	AKT3,ATF3,BHLHE40,CACNA2D4,CACNB4,CAT,CCNB1,CCNB2,CCND1,CCNE2,CDC25C,CDK1,CHEK1,E2F8,GADD45G,MRE11,PDK1,PHF19,PPP2R2B,RALA,RRAS2,SMAD3,TGFBR1,TGFBR3
Role of Tissue Factor in Cancer	3.43	0.112	AKT3,CSF1,HBEGF,ITGB3,JAK2,MMP1,PLAUR,RALA,RPS6KA1,RPS6KA2,RRAS2,SRC,VEGFA
HGF Signaling	3.41	0.106	AKT3,CCND1,ITGAL,ITGB3,ITGB6,ITGB7,ITGB8,MAP3K5,MAPK10,MET,PRKCH,RALA,RAPGEF1,RRAS2
ERK/MAPK Signaling	3.39	0.0888	DUSP1,H3-3A/H3-3B,H3C3,ITGAL,ITGB3,ITGB6,ITGB7,ITGB8,PLA2G4A,PLA2G4C,PPP1R14C,PPP1R3D,PPP2R2B,PRKACB,RALA,RAPGEF1,RPS6KA1,RRAS2,SRC
Cell Cycle: G2/M DNA Damage Checkpoint Regulation	3.33	0.16	AURKA,CCNB1,CCNB2,CDC25C,CDK1,CHEK1,PLK1,RPS6KA1
PTEN Signaling	3.33	0.1	AKT3,CCND1,IGF1R,IGF2R,INPP5D,ITGAL,ITGB3,ITGB6,ITGB7,ITGB8,KDR,RALA,RRAS2,TGFBR1,TGFBR3
DNA damage-induced 14-3-3σ Signaling	3.28	0.263	AKT3,CCNB1,CCNB2,CCNE2,CDK1
Crosstalk between Dendritic Cells and Natural Killer Cells	3.27	0.121	CAMK2G,CD209,CD226,CD83,HLA-DRA,HLA-DRB1,HLA-DRB5,ITGAL,LTBR,MICB,TNFSF10
LXR/RXR Activation	3.19	0.106	ABCA1,APOC1,APOC2,APOE,CCL7,CLU,CYP51A1,FASN,IL1R1,IL1R2,LDLR,S100A8,SERPINF1
GADD45 Signaling	3.17	0.25	CCNB1,CCND1,CCNE2,CDK1,GADD45G
Renal Cell Carcinoma Signaling	3.14	0.125	AKT3,EGLN3,ELOB,HIF1A,MET,PDGFB,RALA,RAPGEF1,RRAS2,VEGFA
Ferroptosis Signaling Pathway	3.09	0.103	ABCA1,AIFM2,CBS/CBSL,DPP4,FANCD2,H2BC17,H2BU1,PRKAB1,RALA,RRAS2,SLC38A1,SLC39A14,TFAP2C
B Cell Development	3.03	0.163	HLA-DMA,HLA-DPA1,HLA-DPB1,HLA-DRA,HLA-DRB1,HLA-DRB5,IL7R
Cardiac Hypertrophy Signaling (Enhanced)	3.01	0.0651	ADCY3,AKT3,CACNA2D4,CACNB4,CAMK2G,FZD5,FZD6,IGF1R,IL1R1,IL1R2,IL7R,ITGAL,ITGB3,ITGB6,ITGB7,ITGB8,ITPR1,JAK2,MAP3K5,MAPK10,MYOCD,PDE1B,PDE3A,PDE4B,PDE8A,PDK1,PRKACB,PRKCH,RALA,RRAS2,TGFBR1,TGFBR3,TNFSF10,TNFSF13,TNFSF4
HER-2 Signaling in Breast Cancer	2.98	0.0867	AKT3,BIRC5,CCND1,CCNE2,HBEGF,ITGB3,ITGB6,ITGB7,ITGB8,NRG1,PDK1,PRKCH,RALA,RRAS2,SMAD3,SRC,SURF1
Cyclins and Cell Cycle Regulation	2.97	0.119	CCNA1,CCNA2,CCNB1,CCNB2,CCND1,CCNE2,CDK1,CDKN2C,E2F8,PPP2R2B
Colorectal Cancer Metastasis Signaling	2.95	0.0781	ADCY3,AKT3,BIRC5,CCND1,FZD5,FZD6,JAK2,JAK3,LRP6,MAPK10,MMP1,MMP12,MMP8,PRKACB,RALA,RRAS2,SMAD3,SRC,TGFBR1,TLR10,VEGFA
Role of CHK Proteins in Cell Cycle Checkpoint Control	2.95	0.14	CDC25C,CDK1,CHEK1,CLSPN,E2F8,MRE11,PLK1,PPP2R2B
PI3K/AKT Signaling	2.91	0.0854	AKT3,CCND1,IL1R1,IL1R2,IL7R,INPP5D,ITGAL,ITGB3,ITGB6,ITGB7,ITGB8,JAK2,JAK3,MAP3K5,PPP2R2B,RALA,RRAS2
Sperm Motility	2.88	0.0787	ABL2,DYRK3,GUCY1A2,GUCY1B1,IGF1R,ITPR1,JAK2,JAK3,KDR,LMTK2,MATK,MET,PDE1B,PDE4B,PLA2G4A,PLA2G4C,PRKACB,PRKCH,SLC16A10,SRC
Role of IL-17A in Psoriasis	2.86	0.286	CXCL5,CXCL6,S100A8,S100A9
p38 MAPK Signaling	2.84	0.102	DUSP1,H3-3A/H3-3B,H3C3,IL1R1,IL1R2,MAP3K5,PLA2G4A,PLA2G4C,RPS6KA1,RPS6KA2,TGFBR1,TIFA
Nitric Oxide Signaling in the Cardiovascular System	2.81	0.101	AKT3,CACNA2D4,CACNB4,GUCY1A2,GUCY1B1,ITPR1,KDR,PDE1B,PRKACB,PRKCH,SLC7A1,VEGFA
IGF-1 Signaling	2.79	0.106	AKT3,GRB10,IGF1R,IGFBP2,IGFBP7,IRS2,JAK2,PRKACB,RALA,RRAS2,SOCS2
Caveolar-mediated Endocytosis Signaling	2.75	0.12	CAVIN1,DYRK3,FLNB,ITGAL,ITGB3,ITGB6,ITGB7,ITGB8,SRC
Role of Osteoblasts, Osteoclasts and Chondrocytes in Rheumatoid Arthritis	2.75	0.0804	ACP5,AKT3,BMP6,CSF1,CTSK,DKK2,FZD5,FZD6,IL1R1,IL1R2,ITGB3,LRP6,MAP3K5,MAPK10,MMP1,MMP8,SOST,SRC
Hereditary Breast Cancer Signaling	2.62	0.0915	AKT3,BRCA2,CCNB1,CCND1,CDC25C,CDK1,CHEK1,FANCD2,GADD45G,MRE11,RAD51,RALA,RRAS2
eNOS Signaling	2.62	0.0881	ADCY3,AKT3,CASP8,CCNA1,CCNA2,GUCY1A2,GUCY1B1,ITPR1,KDR,PRKAB1,PRKACB,PRKCH,SLC7A1,VEGFA
Role of Macrophages, Fibroblasts and Endothelial Cells in Rheumatoid Arthritis	2.61	0.0708	AKT3,C5AR1,CAMK2G,CCND1,CSF1,DKK2,FZD5,FZD6,IL1R1,IL1R2,JAK2,LRP6,LTBR,MMP1,PDGFB,PRKCH,RALA,RRAS2,SOST,SRC,TLR10,TRAF3,VEGFA
Atherosclerosis Signaling	2.49	0.0923	APOC1,APOC2,APOE,CLU,CSF1,CXCR4,MMP1,PDGFB,PLA2G4A,PLA2G4C,S100A8,TNFRSF12A
Neuroinflammation Signaling Pathway	2.46	0.0698	AKT3,BIRC5,CASP1,CASP8,GABRE,HLA-DMA,HLA-DPA1,HLA-DPB1,HLA-DRA,HLA-DRB1,HLA-DRB5,IL1R1,JAK2,JAK3,MAPK10,MFGE8,PLA2G4A,PLA2G4C,TGFBR1,TGFBR3,TLR10,TRAF3
Salvage Pathways of Pyrimidine Deoxyribonucleotides	2.44	0.333	APOBEC3B,CDA,TK1
Cellular Effects of Sildenafil (Viagra)	2.43	0.0872	ADCY3,CACNA2D4,CACNB4,GUCY1A2,GUCY1B1,ITPR1,KCNN4,KCNQ3,MYO10,PDE1B,PDE3A,PDE4B,PRKACB
VEGF Family Ligand-Receptor Interactions	2.41	0.107	AKT3,KDR,NRP2,PLA2G4A,PLA2G4C,PRKCH,RALA,RRAS2,VEGFA
FAK Signaling	2.38	0.094	AKT3,HMMR,ITGAL,ITGB3,ITGB6,ITGB7,ITGB8,RALA,RRAS2,SRC,VCL
Production of Nitric Oxide and Reactive Oxygen Species in Macrophages	2.29	0.0785	AKT3,APOC1,APOC2,APOE,CAT,CLU,JAK2,JAK3,MAP3K5,MAPK10,PPP1R14C,PPP1R3D,PPP2R2B,PRKCH,S100A8
Wnt/β-catenin Signaling	2.29	0.0809	AKT3,CCND1,CD44,CDH5,DKK2,FZD5,FZD6,LRP6,PPP2R2B,SOX4,SRC,TGFBR1,TGFBR3,TLE1
Virus Entry via Endocytic Pathways	2.28	0.0962	CXADR,FLNB,ITGB3,ITGB6,ITGB7,ITGB8,PRKCH,RALA,RRAS2,SRC
Regulation Of The Epithelial Mesenchymal Transition By Growth Factors Pathway	2.27	0.0781	AKT3,JAK2,JAK3,MAPK10,MET,MMP1,PDGFB,RALA,RRAS2,SMAD3,TGFBR1,TNFSF10,TNFSF13,TNFSF4,ZEB1
Glioma Invasiveness Signaling	2.26	0.11	CD44,HMMR,ITGB3,PLAU,PLAUR,RALA,RRAS2,TIMP3
Inflammasome pathway	2.25	0.2	CASP1,CASP8,NLRP1,PANX1
Insulin Receptor Signaling	2.23	0.0857	AKT3,ASIC1,GRB10,INPP5D,IRS2,JAK2,PPP1R14C,PPP1R3D,PRKACB,RALA,RAPGEF1,RRAS2
Erythropoietin Signaling Pathway	2.2	0.0791	AKT3,CCND1,HIF1A,IRS2,ITPR1,JAK2,MACROH2A2,PRKCH,RALA,RRAS2,SRC,TNFSF10,TNFSF13,TNFSF4
Glioma Signaling	2.19	0.0887	AKT3,CAMK2G,CCND1,CDKN2C,E2F8,IGF1R,IGF2R,PDGFB,PRKCH,RALA,RRAS2
Paxillin Signaling	2.17	0.0926	ITGAL,ITGB3,ITGB6,ITGB7,ITGB8,MAPK10,RALA,RRAS2,SRC,VCL
PI3K Signaling in B Lymphocytes	2.16	0.0839	AKT3,ATF3,BLNK,CAMK2G,INPP5D,IRS2,ITPR1,MALT1,PLEKHA1,RALA,RRAS2,VAV2
Endocannabinoid Cancer Inhibition Pathway	2.16	0.0839	ADCY3,AKT3,ATF3,CASP1,CASP8,CCND1,CCNE2,HIF1A,PRKAB1,PRKACB,SRC,VEGFA
ILK Signaling	2.15	0.0758	AKT3,CCND1,FERMT2,FLNB,HIF1A,IRS2,ITGB3,ITGB6,ITGB7,ITGB8,MAPK10,MYO10,PPP2R2B,VCL,VEGFA
Adrenomedullin signaling pathway	2.13	0.0754	ADCY3,AKT3,GUCY1A2,GUCY1B1,HIF1A,ITPR1,KCNN4,KCNQ3,MAPK10,MATK,MYLK2,PRKACB,RALA,RRAS2,TFAP2C
TREM1 Signaling	2.12	0.104	AKT3,CASP1,CCL7,CD83,CIITA,JAK2,NLRP2,TLR10
Dopamine Receptor Signaling	2.12	0.104	ADCY3,NCS1,PPP1R14C,PPP1R3D,PPP2R2B,PRKACB,QDPR,SPR
Breast Cancer Regulation by Stathmin1	2.1	0.0574	ADGRE2,ADGRE3,ADGRL4,ARHGEF12,ARHGEF5,AURKA,AURKB,BMP6,C5AR1,CAMK2G,CCND1,CDK1,CYSLTR2,E2F8,FOXM1,FPR1,FZD5,FZD6,GPR157,GPR18,GPR85,HIF1A,HTR7,MAS1,P2RY13,PDGFB,PPP1R14C,PPP1R3D,PPP2R2B,PRKACB,PRKCH,RALA,RRAS2,VEGFA
Axonal Guidance Signaling	2.09	0.0593	ABLIM1,ABLIM3,ADAMTS15,ADAMTS9,AKT3,ARHGEF12,BMP6,CXCR4,FZD5,FZD6,ITGAL,ITGB3,ITGB6,ITGB7,ITGB8,MET,MMP1,MMP12,MMP8,NRP2,PDGFB,PLXNA2,PLXNA3,PRKACB,PRKCH,RALA,RRAS2,SLIT3,UNC5B,VEGFA
Ephrin Receptor Signaling	2.09	0.0746	AKT3,CXCR4,ITGAL,ITGB3,ITGB6,ITGB7,ITGB8,JAK2,PDGFB,RALA,RAPGEF1,RRAS2,SH2D3C,SRC,VEGFA
Superpathway of D-myo-inositol (1,4,5)-trisphosphate Metabolism	2.03	0.174	IMPA2,INPP5A,INPP5D,ITPKB
Gustation Pathway	2.03	0.0778	ADCY3,ASIC1,CACNA2D4,CACNB4,ITPR1,P2RY13,P2RY8,PANX1,PDE1B,PDE3A,PDE4B,PDE8A,PRKACB
Interferon Signaling	2	0.139	IFIT1,JAK2,MX1,OAS1,PSMB8
FAT10 Cancer Signaling Pathway	2	0.12	AKT3,CXCR4,MAD2L1,SMAD3,TGFBR1,TGFBR3
Salvage Pathways of Pyrimidine Ribonucleotides	1.98	0.0918	APOBEC3B,CDA,CDK1,CMPK2,MAK,NEK2,PLK1,PRKCH,TTK
Pyridoxal 5'-phosphate Salvage Pathway	1.96	0.106	CDK1,MAK,NEK2,PLK1,PNPO,PRKCH,TTK
Granulocyte Adhesion and Diapedesis	1.96	0.0741	C5AR1,CCL7,CDH5,CXCL16,CXCL5,CXCL6,CXCR4,FPR1,IL1R1,IL1R2,MMP1,MMP12,MMP8,SDC4
Cholesterol Biosynthesis I	1.96	0.231	CYP51A1,DHCR7,MSMO1
Cholesterol Biosynthesis II (via 24,25-dihydrolanosterol)	1.96	0.231	CYP51A1,DHCR7,MSMO1
Cholesterol Biosynthesis III (via Desmosterol)	1.96	0.231	CYP51A1,DHCR7,MSMO1
MSP-RON Signaling In Macrophages Pathway	1.93	0.0855	CIITA,HLA-DMA,HLA-DPA1,HLA-DPB1,HLA-DRA,HLA-DRB1,HLA-DRB5,JAK2,RALA,RRAS2
Endothelin-1 Signaling	1.92	0.0733	ADCY3,CASP1,CASP8,GUCY1A2,GUCY1B1,ITPR1,MAPK10,PLA2G4A,PLA2G4C,PLD4,PRKCH,RALA,RRAS2,SRC
Leukocyte Extravasation Signaling	1.89	0.0725	CD44,CDH5,CXCR4,ITGAL,JAM2,MAPK10,MMP1,MMP12,MMP8,PRKCH,SRC,TIMP3,VAV2,VCL
Clathrin-mediated Endocytosis Signaling	1.89	0.0725	APOC1,APOC2,APOE,CLU,ITGB3,ITGB6,ITGB7,ITGB8,LDLR,MET,PDGFB,S100A8,SRC,VEGFA
FcγRIIB Signaling in B Lymphocytes	1.87	0.0941	BLNK,CACNA2D4,CACNB4,INPP5D,ITPR1,MAPK10,RALA,RRAS2
Hepatic Fibrosis / Hepatic Stellate Cell Activation	1.87	0.0722	BAMBI,COL6A2,CSF1,IGF1R,IL1R1,IL1R2,KDR,MET,MMP1,MYO10,PDGFB,SMAD3,TGFBR1,VEGFA
DNA Double-Strand Break Repair by Homologous Recombination	1.87	0.214	BRCA2,MRE11,RAD51
Rac Signaling	1.86	0.0797	CD44,IQGAP2,ITGAL,ITGB3,ITGB6,ITGB7,ITGB8,MCF2L,RALA,RRAS2,TIAM1
Role of JAK1 and JAK3 in γc Cytokine Signaling	1.86	0.101	BLNK,IL7R,IRS2,JAK2,JAK3,RALA,RRAS2
Regulation of the Epithelial-Mesenchymal Transition Pathway	1.85	0.0718	AKT3,FZD5,FZD6,HIF1A,JAG1,JAK2,JAK3,MET,NOTCH3,RALA,RRAS2,SMAD3,TGFBR1,ZEB1
PDGF Signaling	1.84	0.093	ABL2,INPP5D,JAK2,JAK3,PDGFB,RALA,RRAS2,SRC
RAR Activation	1.83	0.0714	ADCY3,AKT3,CRABP2,DUSP1,GTF2H1,JAK2,MAP3K5,MAPK10,MMP1,PRKACB,PRKCH,SMAD3,SRC,VEGFA
Ovarian Cancer Signaling	1.83	0.0759	AKT3,BRCA2,CCND1,CD44,FZD5,FZD6,PRKACB,RAD51,RALA,RRAS2,SRC,VEGFA
GM-CSF Signaling	1.83	0.1	AKT3,BCL2A1,CAMK2G,CCND1,JAK2,RALA,RRAS2
Th1 Pathway	1.82	0.082	HLA-DMA,HLA-DPA1,HLA-DPB1,HLA-DRA,HLA-DRB1,HLA-DRB5,JAK2,JAK3,NOTCH3,STAT4
Systemic Lupus Erythematosus In B Cell Signaling Pathway	1.81	0.065	AKT3,BLNK,CCND1,IFIT2,INPP5D,JAK2,LILRB3,LILRB4,MALT1,PAG1,PRKCH,RALA,RRAS2,SRC,TNFSF10,TNFSF13,TNFSF4,TRAF3
IL-15 Production	1.79	0.0813	ABL2,DYRK3,IGF1R,JAK2,JAK3,KDR,LMTK2,MATK,MET,SRC
Natural Killer Cell Signaling	1.78	0.0704	AKT3,CD226,CD244,ITGAL,JAK2,JAK3,MAP3K5,MICB,RALA,RRAS2,STAT4,TNFSF10,ULBP3,VAV2
Choline Biosynthesis III	1.78	0.2	CHPT1,PHKA1,PLD4
CREB Signaling in Neurons	1.78	0.0548	ADCY3,ADGRE2,ADGRE3,ADGRL4,AKT3,BMP6,C5AR1,CACNA2D4,CACNB4,CAMK2G,CYSLTR2,FPR1,FZD5,FZD6,GPR157,GPR18,GPR85,HTR7,IGF1R,IGF2R,ITPR1,KDR,MAS1,P2RY13,PDGFB,PRKACB,PRKCH,RALA,RPS6KA1,RRAS2,TGFBR1,TGFBR3,VEGFA
Netrin Signaling	1.77	0.0972	ABLIM1,ABLIM3,CACNA2D4,CACNB4,ITPR1,PRKACB,UNC5B
Chondroitin Sulfate Biosynthesis	1.77	0.107	CHST11,CHST3,CSGALNACT1,HS6ST1,NDST2,XYLT1
Dopamine-DARPP32 Feedback in cAMP Signaling	1.76	0.0718	ADCY3,CACNA2D4,CACNB4,CREM,GUCY1A2,GUCY1B1,ITPR1,KCNJ2,PPP1R14C,PPP1R3D,PPP2R2B,PRKACB,PRKCH
Role of IL-17A in Arthritis	1.73	0.105	CCL7,CXCL5,CXCL6,MAPK10,MMP1,RPS6KA1
Zymosterol Biosynthesis	1.73	0.333	CYP51A1,MSMO1
Actin Cytoskeleton Signaling	1.68	0.0653	ARHGEF12,IQGAP2,ITGAL,ITGB3,ITGB6,ITGB7,ITGB8,MATK,MYLK2,MYO10,PDGFB,RALA,RRAS2,TIAM1,VAV2,VCL
Dermatan Sulfate Biosynthesis	1.67	0.102	CHST11,CHST3,CSGALNACT1,HS6ST1,NDST2,XYLT1
Synaptic Long Term Potentiation	1.66	0.0775	CAMK2G,ITPR1,PPP1R14C,PPP1R1A,PPP1R3D,PRKACB,PRKCH,RALA,RPS6KA1,RRAS2
G Beta Gamma Signaling	1.66	0.0775	AKT3,CACNA2D4,CACNB4,HBEGF,ITPR1,PRKACB,PRKCH,RALA,RRAS2,SRC
GNRH Signaling	1.64	0.0691	ADCY3,CACNA2D4,CACNB4,CAMK2G,HBEGF,ITPR1,MAP3K5,MAPK10,PRKACB,PRKCH,RALA,RRAS2,SRC
Melanocyte Development and Pigmentation Signaling	1.63	0.0851	ADCY3,KITLG,PRKACB,RALA,RPS6KA1,RPS6KA2,RRAS2,SRC
Antioxidant Action of Vitamin C	1.63	0.0804	JAK2,MAPK10,NXN,PLA2G4A,PLA2G4C,PLD4,SLC2A14,SLC2A3,SLC2A8
D-myo-inositol (1,4,5)-trisphosphate Degradation	1.63	0.176	IMPA2,INPP5A,INPP5D
cAMP-mediated signaling	1.62	0.0655	ADCY3,CAMK2G,CREM,DUSP1,FPR1,HTR7,P2RY13,PDE1B,PDE3A,PDE4B,PDE8A,PRKACB,RGS2,RPS6KA1,SRC
Synaptogenesis Signaling Pathway	1.62	0.0609	ADCY3,AKT3,APOE,CACNB4,CAMK2G,CDH5,ITPR1,NECTIN1,PRKACB,RALA,RAPGEF1,RRAS2,SRC,STXBP1,STXBP6,SYT11,THBS1,THBS3,TIAM1
Role of IL-17F in Allergic Inflammatory Airway Diseases	1.61	0.111	CCL7,CXCL5,CXCL6,RPS6KA1,RPS6KA2
Factors Promoting Cardiogenesis in Vertebrates	1.6	0.0728	BMP6,CAMK2G,CCND1,FZD5,FZD6,LRP6,MAPK10,MYOCD,PRKCH,TGFBR1,TGFBR3
Phosphatidylcholine Biosynthesis I	1.6	0.286	CHPT1,PHKA1
Glioblastoma Multiforme Signaling	1.59	0.0702	AKT3,CCND1,CCNE2,E2F8,FZD5,FZD6,IGF1R,ITPR1,PDGFB,RALA,RRAS2,SRC
Type II Diabetes Mellitus Signaling	1.58	0.0724	AKT3,CACNA2D4,CACNB4,IRS2,ITPR1,MAP3K5,MAPK10,PRKAB1,PRKCH,SLC27A2,SOCS2
IL-3 Signaling	1.57	0.0886	AKT3,INPP5D,JAK2,PRKCH,RALA,RAPGEF1,RRAS2
Thyroid Cancer Signaling	1.57	0.0886	AKT3,CCND1,CXCR4,IRS2,PDK1,RALA,RRAS2
Estrogen-Dependent Breast Cancer Signaling	1.57	0.0886	AKT3,CCND1,HSD17B14,IGF1R,RALA,RRAS2,SRC
1D-myo-inositol Hexakisphosphate Biosynthesis II (Mammalian)	1.56	0.167	INPP5A,INPP5D,ITPKB
D-myo-inositol (1,3,4)-trisphosphate Biosynthesis	1.56	0.167	INPP5A,INPP5D,ITPKB
Integrin Signaling	1.56	0.0657	AKT3,ITGAL,ITGB3,ITGB6,ITGB7,ITGB8,MYLK2,PDGFB,RALA,RAPGEF1,RRAS2,SRC,TSPAN6,VCL
Autophagy	1.56	0.0657	AKT3,BMP6,HIF1A,IRS2,MAPK10,PDGFB,PPP2R2B,PRKAB1,PRKACB,RAB7B,RALA,SLC7A5,TRAF3,VEGFA
PPARα/RXRα Activation	1.55	0.0674	ABCA1,ADCY3,FASN,IL1R1,IL1R2,JAK2,PRKAB1,PRKACB,RALA,RRAS2,SMAD3,TGFBR1,TGFBR3
Role of BRCA1 in DNA Damage Response	1.54	0.0875	BRCA2,CHEK1,E2F8,FANCD2,MRE11,PLK1,RAD51
FLT3 Signaling in Hematopoietic Progenitor Cells	1.54	0.0875	AKT3,INPP5D,RALA,RPS6KA1,RPS6KA2,RRAS2,STAT4
Agranulocyte Adhesion and Diapedesis	1.54	0.0654	C5AR1,CCL7,CDH5,CXCL16,CXCL5,CXCL6,CXCR4,IL1R1,ITGB7,MMP1,MMP12,MMP8,MYO10,SDC4
G-Protein Coupled Receptor Signaling	1.54	0.0616	ADCY3,AKT3,CAMK2G,DUSP1,FPR1,HTR7,P2RY13,PDE1B,PDE3A,PDE4B,PDE8A,PRKACB,RALA,RGS2,RPS6KA1,RRAS2,SRC
Cardiac β-adrenergic Signaling	1.54	0.069	ADCY3,CACNA2D4,CACNB4,PDE1B,PDE3A,PDE4B,PDE8A,PPP1R14C,PPP1R1A,PPP1R3D,PPP2R2B,PRKACB
Fc Epsilon RI Signaling	1.52	0.0769	AKT3,INPP5D,MAPK10,PLA2G4A,PLA2G4C,PRKCH,RALA,RRAS2,VAV2
White Adipose Tissue Browning Pathway	1.52	0.0735	ADCY3,CACNA2D4,CACNB4,GUCY1A2,GUCY1B1,ITPR1,KDR,PRKAB1,PRKACB,VEGFA
Role of MAPK Signaling in the Pathogenesis of Influenza	1.52	0.0864	AKT3,MAP3K5,MAPK10,PLA2G4A,PLA2G4C,RALA,RRAS2
BEX2 Signaling Pathway	1.52	0.0864	AKT3,CCND1,HIF1A,ITGB6,MAPK10,PPP2R2B,VEGFA
VEGF Signaling	1.51	0.0808	AKT3,HIF1A,KDR,RALA,RRAS2,SRC,VCL,VEGFA
PAK Signaling	1.5	0.0763	ITGAL,ITGB3,ITGB6,ITGB7,ITGB8,MAPK10,PDGFB,RALA,RRAS2
Granzyme A Signaling	1.5	0.158	H1-1,H1-2,H1-3
Chondroitin Sulfate Biosynthesis (Late Stages)	1.5	0.104	CHST11,CHST3,CSGALNACT1,HS6ST1,NDST2
JAK/Stat Signaling	1.49	0.0854	AKT3,JAK2,JAK3,RALA,RRAS2,SOCS2,STAT4
D-myo-inositol (1,4,5,6)-Tetrakisphosphate Biosynthesis	1.49	0.0678	ACP5,CDC25C,DUSP1,DUSP14,DUSP16,INPP5D,PPP1R14C,PPP1R1A,PPP1R3D,PPP2R2B,PTPRM,PTPRN
D-myo-inositol (3,4,5,6)-tetrakisphosphate Biosynthesis	1.49	0.0678	ACP5,CDC25C,DUSP1,DUSP14,DUSP16,INPP5D,PPP1R14C,PPP1R1A,PPP1R3D,PPP2R2B,PTPRM,PTPRN
MSP-RON Signaling In Cancer Cells Pathway	1.49	0.0725	AKT3,CCND1,HIF1A,MET,PLAUR,RALA,RPS6KA2,RRAS2,SRC,VEGFA
Role of NFAT in Cardiac Hypertrophy	1.45	0.0636	ADCY3,AKT3,CACNA2D4,CACNB4,CAMK2G,IGF1R,ITPR1,MAPK10,PRKACB,PRKCH,RALA,RRAS2,SRC,TGFBR1
Glutamate Removal from Folates	1.43	1	GGH
IL-17A Signaling in Airway Cells	1.43	0.0896	AKT3,CXCL5,CXCL6,JAK2,JAK3,MAPK10
Apoptosis Signaling	1.41	0.0769	BCL2A1,CASP8,CDK1,MAP3K5,RALA,RPS6KA1,RRAS2,SPTAN1
Endocannabinoid Developing Neuron Pathway	1.41	0.0732	ADCY3,AKT3,CCND1,MAPK10,MGLL,PRKACB,RALA,RRAS2,SRC
Coronavirus Pathogenesis Pathway	1.4	0.064	CASP1,CASP8,CCND1,CCNE2,E2F8,HIF1A,MAPK10,OAS1,OAS2,OAS3,SMAD3,TGFBR1,TRAF3
UVC-Induced MAPK Signaling	1.4	0.098	MAPK10,PRKCH,RALA,RRAS2,SRC
Cell Cycle: G1/S Checkpoint Regulation	1.4	0.0882	CCND1,CCNE2,CDKN2C,E2F8,NRG1,SMAD3
Prolactin Signaling	1.4	0.0814	JAK2,KCNMA1,NMI,PRKCH,RALA,RRAS2,SOCS2
Role of Hypercytokinemia/hyperchemokinemia in the Pathogenesis of Influenza	1.4	0.0814	CASP1,IFIT2,MX1,OAS1,OAS2,OAS3,RSAD2
HOTAIR Regulatory Pathway	1.39	0.0675	AKT3,CD44,FOXM1,H3-3A/H3-3B,H3C3,JAM2,MET,MMP1,MMP12,MMP8,PCDHB5
Glucocorticoid Receptor Signaling	1.37	0.0516	AKT3,DUSP1,GTF2H1,H3-3A/H3-3B,H3C3,HLA-DMA,HLA-DPA1,HLA-DPB1,HLA-DRA,HLA-DRB1,HLA-DRB5,IL1R1,IL1R2,IL7R,JAK2,JAK3,MAPK10,MMP1,MMP8,PLA2G4A,PLA2G4C,PLAU,PRKAB1,PRKACB,RALA,RRAS2,SMAD3,SRC,TGFBR1,UQCRFS1
FXR/RXR Activation	1.35	0.0714	AKT3,APOC1,APOC2,APOE,CLU,CYP27A1,FASN,MAPK10,SERPINF1
Reelin Signaling in Neurons	1.35	0.0714	AKT3,APOE,ARHGEF12,ARHGEF5,CAMK2G,MAPK10,PDK1,RAPGEF1,SRC
Dilated Cardiomyopathy Signaling Pathway	1.34	0.0685	ADCY3,AKT3,CACNA2D4,CACNB4,CAMK2G,ITPR1,MYO10,PDE3A,PRKACB,TNNT1
Cell Cycle Regulation by BTG Family Proteins	1.33	0.108	CCND1,CCNE2,E2F8,PPP2R2B
Growth Hormone Signaling	1.32	0.0845	IGF1R,JAK2,PRKCH,RPS6KA1,RPS6KA2,SOCS2
LPS/IL-1 Mediated Inhibition of RXR Function	1.31	0.0595	ABCA1,APOC1,APOC2,APOE,CAT,CHST11,CHST3,FABP3,GSTM3,HS6ST1,IL1R1,IL1R2,NDST2,SLC27A2,SLCO1A2
Hepatic Cholestasis	1.31	0.0635	ABCC1,ADCY3,CYP27A1,IL1R1,IL1R2,MAPK10,PRKACB,PRKCH,SLCO1A2,TNFSF10,TNFSF13,TNFSF4
3-phosphoinositide Degradation	1.31	0.0635	ACP5,CDC25C,DUSP1,DUSP14,DUSP16,INPP5D,PPP1R14C,PPP1R1A,PPP1R3D,PPP2R2B,PTPRM,PTPRN
Androgen Signaling	1.3	0.0651	CACNA2D4,CACNB4,CCND1,GTF2H1,H3-3A/H3-3B,H3C3,ITPR1,PRKACB,PRKCH,SMAD3,SRC
Corticotropin Releasing Hormone Signaling	1.29	0.0671	ADCY3,CACNA2D4,CACNB4,GUCY1A2,GUCY1B1,ITPR1,JUND,PRKACB,PRKCH,VEGFA
Acute Myeloid Leukemia Signaling	1.28	0.0769	AKT3,CCNA1,CCND1,JUP,KITLG,RALA,RRAS2
Superpathway of Inositol Phosphate Compounds	1.28	0.0601	ACP5,CDC25C,DUSP1,DUSP14,DUSP16,INPP5A,INPP5D,ITPKB,PPP1R14C,PPP1R1A,PPP1R3D,PPP2R2B,PTPRM,PTPRN
Opioid Signaling Pathway	1.28	0.058	ADCY3,AKT3,CACNA2D4,CACNB4,CAMK2G,ITPR1,PDE1B,PDK1,PRKACB,PRKCH,RALA,RGS1,RPS6KA1,RPS6KA2,RRAS2,SRC
Xenobiotic Metabolism PXR Signaling Pathway	1.27	0.0625	CAMK2G,CAT,CHST11,CHST3,GRIP1,GSTM3,HS6ST1,NDST2,PPP1R14C,PPP1R3D,PRKACB,PRKCH
Inhibition of Matrix Metalloproteases	1.26	0.103	MMP1,MMP12,MMP8,TIMP3
D-myo-inositol-5-phosphate Metabolism	1.25	0.0622	ACP5,CDC25C,DUSP1,DUSP14,DUSP16,INPP5D,PPP1R14C,PPP1R1A,PPP1R3D,PPP2R2B,PTPRM,PTPRN
CDK5 Signaling	1.25	0.0714	ADCY3,MAPK10,PPP1R14C,PPP1R3D,PPP2R2B,PRKACB,RALA,RRAS2
Actin Nucleation by ARP-WASP Complex	1.24	0.0753	ITGAL,ITGB3,ITGB6,ITGB7,ITGB8,RALA,RRAS2
Synaptic Long Term Depression	1.24	0.0619	CACNA2D4,CACNB4,GUCY1A2,GUCY1B1,IGF1R,ITPR1,PLA2G4A,PLA2G4C,PPP2R2B,PRKCH,RALA,RRAS2
Relaxin Signaling	1.23	0.0654	ADCY3,AKT3,GUCY1A2,GUCY1B1,PDE1B,PDE3A,PDE4B,PDE8A,PRKACB,VEGFA
CNTF Signaling	1.23	0.0877	JAK2,RALA,RPS6KA1,RPS6KA2,RRAS2
Fcγ Receptor-mediated Phagocytosis in Macrophages and Monocytes	1.22	0.0745	AKT3,FYB1,INPP5D,PLD4,PRKCH,SRC,VAV2
Cancer Drug Resistance By Drug Efflux	1.2	0.0862	ABCC1,AKT3,PDK1,RALA,RRAS2
Role of JAK family kinases in IL-6-type Cytokine Signaling	1.2	0.12	JAK2,MAPK10,OSMR
Bupropion Degradation	1.2	0.12	CYP4X1,CYP51A1,POR
Adipogenesis pathway	1.2	0.0667	AGPAT2,DGKD,EGR2,FZD5,FZD6,GTF2H1,HIF1A,RPS6KA1,SMAD3
Role of Pattern Recognition Receptors in Recognition of Bacteria and Viruses	1.19	0.0641	C5AR1,CASP1,MAPK10,OAS1,OAS2,OAS3,PRKCH,TNFSF10,TNFSF13,TNFSF4
TGF-β Signaling	1.18	0.0729	INHBA,PMEPA1,RALA,RRAS2,SMAD3,TGFBR1,ZFYVE9
IL-12 Signaling and Production in Macrophages	1.18	0.0662	AKT3,APOC1,APOC2,APOE,CLU,MAPK10,PRKCH,S100A8,STAT4
Bladder Cancer Signaling	1.18	0.069	CCND1,MMP1,MMP12,MMP8,RALA,RRAS2,THBS1,VEGFA
Tight Junction Signaling	1.17	0.0618	AKT3,JAM2,MYO10,NECTIN1,PPP2R2B,PRKACB,SPTAN1,TGFBR1,TIAM1,TJP1,VCL
Hematopoiesis from Multipotent Stem Cells	1.15	0.167	CSF1,KITLG
p53 Signaling	1.15	0.0714	AKT3,BIRC5,CCND1,CHEK1,GADD45G,HIF1A,THBS1
Aryl Hydrocarbon Receptor Signaling	1.14	0.0629	CCNA1,CCNA2,CCND1,CCNE2,CHEK1,DHFR,GSTM3,NFIA,SRC,TGM2
Taurine Biosynthesis	1.14	0.5	CDO1
Palmitate Biosynthesis I (Animals)	1.14	0.5	FASN
Fatty Acid Biosynthesis Initiation II	1.14	0.5	FASN
Cysteine Biosynthesis/Homocysteine Degradation	1.14	0.5	CBS/CBSL
Iron homeostasis signaling pathway	1.13	0.0647	BMP6,EPAS1,HEPH,HIF1A,JAK2,JAK3,PDGFB,SLC39A14,SMAD3
Apelin Endothelial Signaling Pathway	1.13	0.0647	ADCY3,AKT3,HIF1A,MAPK10,PRKAB1,PRKCH,RALA,RRAS2,SMAD3
Serotonin Receptor Signaling	1.13	0.093	ADCY3,HTR7,QDPR,SPR
Insulin Secretion Signaling Pathway	1.13	0.056	ADCY3,ASIC1,CACNA2D4,CACNB4,CAMK2G,ITPR1,JAK2,JAK3,PRKACB,PRKCH,SLC2A14,SLC2A3,SLC2A8,SRC,STAT4
3-phosphoinositide Biosynthesis	1.12	0.0591	ACP5,CDC25C,DUSP1,DUSP14,DUSP16,INPP5D,PPP1R14C,PPP1R1A,PPP1R3D,PPP2R2B,PTPRM,PTPRN
Estrogen Receptor Signaling	1.12	0.052	ADCY3,AKT3,CACNA2D4,CACNB4,CCND1,HIF1A,IGF1R,IGF2R,JAK2,JAK3,MMP1,MMP12,MMP8,PRKAB1,PRKACB,PRKCH,RALA,RRAS2,SRC,UQCRFS1,VEGFA
Chemokine Signaling	1.12	0.075	CAMK2G,CCL7,CXCR4,RALA,RRAS2,SRC
NAD Salvage Pathway II	1.12	0.111	ACP3,ACP5,NT5E
Renin-Angiotensin Signaling	1.11	0.0667	ADCY3,ITPR1,JAK2,MAPK10,PRKACB,PRKCH,RALA,RRAS2
Role of NANOG in Mammalian Embryonic Stem Cell Pluripotency	1.11	0.0667	AKT3,BMP6,FZD5,FZD6,JAK2,JAK3,RALA,RRAS2
tRNA Splicing	1.1	0.0909	PDE1B,PDE3A,PDE4B,PDE8A
Estrogen Biosynthesis	1.1	0.0909	CYP4X1,CYP51A1,HSD17B14,POR
Neuropathic Pain Signaling In Dorsal Horn Neurons	1.09	0.0693	CAMK2G,ITPR1,KCNN4,KCNQ3,PRKACB,PRKCH,SRC
NAD Phosphorylation and Dephosphorylation	1.09	0.154	ACP3,ACP5
Guanosine Nucleotides Degradation III	1.09	0.154	ACP3,NT5E
UDP-N-acetyl-D-galactosamine Biosynthesis II	1.09	0.154	HK3,UAP1
Acute Phase Response Signaling	1.08	0.0595	AKT3,C2,CRABP2,IL1R1,JAK2,MAP3K5,OSMR,RALA,RRAS2,SERPINF1,SOCS2
Thrombopoietin Signaling	1.08	0.0794	IRS2,JAK2,PRKCH,RALA,RRAS2
Dermatan Sulfate Biosynthesis (Late Stages)	1.05	0.087	CHST11,CHST3,HS6ST1,NDST2
IL-23 Signaling Pathway	1.05	0.087	AKT3,HIF1A,JAK2,STAT4
Superpathway of Cholesterol Biosynthesis	1.04	0.103	CYP51A1,DHCR7,MSMO1
Sonic Hedgehog Signaling	1.04	0.103	CCNB1,CDK1,PRKACB
PEDF Signaling	1.04	0.0714	AKT3,CASP8,RALA,RRAS2,SERPINF1,ZEB1
Mouse Embryonic Stem Cell Pluripotency	1.04	0.0673	AKT3,FZD5,FZD6,JAK2,JAK3,RALA,RRAS2
ErbB2-ErbB3 Signaling	1.03	0.0769	CCND1,JAK3,NRG1,RALA,RRAS2
Urate Biosynthesis/Inosine 5'-phosphate Degradation	1.03	0.143	ACP3,NT5E
IL-8 Signaling	1.03	0.0569	AKT3,CCND1,HBEGF,ITGB3,KDR,MAPK10,PLD4,PRKCH,RALA,RRAS2,SRC,VEGFA
Triacylglycerol Biosynthesis	1.02	0.0851	AGPAT2,PLPP3,PLPP4,PLPPR2
Endocannabinoid Neuronal Synapse Pathway	1.02	0.0612	ABHD6,ADCY3,CACNA2D4,CACNB4,DAGLA,ITPR1,MAPK10,MGLL,PRKACB
Apelin Adipocyte Signaling Pathway	1	0.0698	ADCY3,CAT,HIF1A,MAPK10,PRKAB1,PRKACB
14-3-3-mediated Signaling	1	0.063	AKT3,MAP3K5,MAPK10,PRKCH,RALA,RPS6KA1,RRAS2,SRC
Chronic Myeloid Leukemia Signaling	0.991	0.0654	AKT3,CCND1,E2F8,RALA,RRAS2,SMAD3,TGFBR1
Phagosome Formation	0.991	0.0604	C5AR1,FCAR,ITGAL,ITGB3,ITGB6,ITGB7,ITGB8,PRKCH,TLR10
IL-6 Signaling	0.987	0.0625	AKT3,IL1R1,IL1R2,JAK2,MAPK10,RALA,RRAS2,VEGFA
Germ Cell-Sertoli Cell Junction Signaling	0.983	0.0585	EPN2,JUP,MAP3K5,MAPK10,RALA,RRAS2,SRC,TGFBR1,TJP1,VCL
BMP signaling pathway	0.983	0.069	BMP6,MAGED1,MAPK10,PRKACB,RALA,RRAS2
1,25-dihydroxyvitamin D3 Biosynthesis	0.971	0.333	POR
Tetrahydrobiopterin Biosynthesis I	0.971	0.333	SPR
Tetrahydrobiopterin Biosynthesis II	0.971	0.333	SPR
L-serine Degradation	0.971	0.333	SRR
B Cell Receptor Signaling	0.971	0.0567	AKT3,BCL2A1,BLNK,CAMK2G,INPP5D,MALT1,MAP3K5,PAG1,RALA,RRAS2,VAV2
SPINK1 General Cancer Pathway	0.951	0.0725	AKT3,JAK2,JAK3,RALA,RRAS2
Melanoma Signaling	0.947	0.08	AKT3,CCND1,RALA,RRAS2
Acetone Degradation I (to Methylglyoxal)	0.943	0.0938	CYP4X1,CYP51A1,POR
Agrin Interactions at Neuromuscular Junction	0.932	0.0714	MAPK10,NRG1,RALA,RRAS2,SRC
Granzyme B Signaling	0.932	0.125	CASP8,LMNB1
Chondroitin Sulfate Degradation (Metazoa)	0.932	0.125	CEMIP2,HEXA
Adenosine Nucleotides Degradation II	0.932	0.125	ACP3,NT5E
Gap Junction Signaling	0.924	0.0556	ADCY3,AKT3,GUCY1A2,GUCY1B1,ITPR1,PRKACB,PRKCH,RALA,RRAS2,SRC,TJP1
Gα12/13 Signaling	0.917	0.0602	AKT3,CDH5,MAP3K5,MAPK10,RALA,RRAS2,SRC,VAV2
Circadian Rhythm Signaling	0.914	0.0909	BHLHE40,BHLHE41,PER3
UVB-Induced MAPK Signaling	0.9	0.0769	H3-3A/H3-3B,H3C3,MAPK10,PRKCH
ERK5 Signaling	0.893	0.0694	RALA,RPS6KA1,RPS6KA2,RRAS2,SRC
Isoleucine Degradation I	0.889	0.118	ECHDC3,EHHADH
Dermatan Sulfate Degradation (Metazoa)	0.889	0.118	CEMIP2,HEXA
Role of JAK2 in Hormone-like Cytokine Signaling	0.886	0.0882	IRS2,JAK2,SOCS2
Fatty Acid β-oxidation I	0.886	0.0882	ECHDC3,EHHADH,SLC27A2
Role of PKR in Interferon Induction and Antiviral Response	0.876	0.0588	ATF3,CASP1,CASP8,MAPK10,NLRP1,NLRP2,PDGFB,TRAF3
ErbB Signaling	0.866	0.0638	HBEGF,MAPK10,NRG1,PRKCH,RALA,RRAS2
Coagulation System	0.857	0.0857	PLAU,PLAUR,TFPI
IL-9 Signaling	0.857	0.0857	IRS2,JAK3,SOCS2
DNA Methylation and Transcriptional Repression Signaling	0.857	0.0857	DNMT3A,H3-3A/H3-3B,H4C15
Primary Immunodeficiency Signaling	0.857	0.0741	BLNK,CIITA,IL7R,JAK3
Leptin Signaling in Obesity	0.857	0.0676	ADCY3,AKT3,JAK2,PDE3A,PRKACB
L-cysteine Degradation I	0.854	0.25	CDO1
Phenylalanine Degradation I (Aerobic)	0.854	0.25	QDPR
Fatty Acid β-oxidation III (Unsaturated, Odd Number)	0.854	0.25	EHHADH
Androgen Biosynthesis	0.848	0.111	HSD17B14,SRD5A3
γ-linolenate Biosynthesis II (Animals)	0.848	0.111	FADS2,SLC27A2
Pregnenolone Biosynthesis	0.848	0.111	CYP27A1,CYP4X1
Inhibition of ARE-Mediated mRNA Degradation Pathway	0.842	0.0559	AKT3,PPP2R2B,PRKACB,PSMB8,PSMB9,TNFSF10,TNFSF13,TNFSF4,ZNF331
NGF Signaling	0.83	0.0593	AKT3,MAP3K5,MAPK10,RALA,RPS6KA1,RPS6KA2,RRAS2
GDNF Family Ligand-Receptor Interactions	0.821	0.0658	IRS2,ITPR1,MAPK10,RALA,RRAS2
Neurotrophin/TRK Signaling	0.821	0.0658	MAP3K5,RALA,RPS6KA1,RRAS2,SPRY2
Cholecystokinin/Gastrin-mediated Signaling	0.815	0.0588	CREM,ITPR1,MAPK10,PRKCH,RALA,RRAS2,SRC
Cell Cycle Control of Chromosomal Replication	0.815	0.0714	CDK1,CDK17,ORC6,PRIM1
Purine Nucleotides Degradation II (Aerobic)	0.81	0.105	ACP3,NT5E
TWEAK Signaling	0.807	0.0811	CASP8,TNFRSF12A,TRAF3
IL-17 Signaling	0.804	0.0535	AKT3,CXCL5,JAK2,MAPK10,RALA,RRAS2,TNFSF10,TNFSF13,TNFSF4,VEGFA
IL-15 Signaling	0.804	0.0649	AKT3,JAK2,JAK3,RALA,RRAS2
Antiproliferative Role of Somatostatin Receptor 2	0.804	0.0649	GUCY1A2,GUCY1B1,RALA,RRAS2,SRC
Apelin Cardiomyocyte Signaling Pathway	0.793	0.0606	AKT3,CAT,HIF1A,ITPR1,MAPK10,PRKCH
NF-κB Activation by Viruses	0.788	0.0641	AKT3,ITGB3,PRKCH,RALA,RRAS2
Maturity Onset Diabetes of Young (MODY) Signaling	0.788	0.0641	APOC1,APOC2,APOE,CACNA2D4,CACNB4
IL-7 Signaling Pathway	0.788	0.0641	AKT3,CCND1,IL7R,JAK3,MET
Docosahexaenoic Acid (DHA) Signaling	0.783	0.0789	AKT3,BCL2A1,SERPINF1
mTOR Signaling	0.783	0.0519	AKT3,HIF1A,PLD4,PPP2R2B,PRKAB1,PRKCH,RALA,RPS6KA1,RPS6KA2,RRAS2,VEGFA
IL-17A Signaling in Fibroblasts	0.783	0.0789	CCL7,CXCL5,MMP1
Xenobiotic Metabolism CAR Signaling Pathway	0.783	0.0529	ABCC1,CHST11,CHST3,GRIP1,GSTM3,HS6ST1,NDST2,PPP2R2B,PRKCH,SRC
Nicotine Degradation III	0.777	0.069	CSGALNACT1,CYP4X1,CYP51A1,POR
CXCR4 Signaling	0.775	0.0539	ADCY3,AKT3,CXCR4,ITPR1,MAPK10,PRKCH,RALA,RRAS2,SRC
Valine Degradation I	0.775	0.1	ECHDC3,EHHADH
NRF2-mediated Oxidative Stress Response	0.767	0.0506	ABCC1,CAT,DNAJB13,ENC1,EPHX1,GSTM3,HERPUD1,JUND,MAP3K5,PRKCH,RALA,RRAS2
Myo-inositol Biosynthesis	0.764	0.2	IMPA2
dTMP De Novo Biosynthesis	0.764	0.2	DHFR
Heparan Sulfate Biosynthesis	0.757	0.0625	CHST11,CHST3,HS6ST1,NDST2,XYLT1
RhoGDI Signaling	0.754	0.0512	ARHGEF12,ARHGEF5,CD44,CDH5,GRIP1,ITGAL,ITGB3,ITGB6,ITGB7,ITGB8,SRC
RhoA Signaling	0.752	0.0565	ABL2,ANLN,ARHGEF12,CIT,IGF1R,MYLK2,NRP2
Endometrial Cancer Signaling	0.74	0.0667	AKT3,CCND1,RALA,RRAS2
PCP pathway	0.74	0.0667	FZD5,FZD6,JUND,MAPK10
Melatonin Degradation I	0.724	0.0656	CSGALNACT1,CYP4X1,CYP51A1,POR
IL-2 Signaling	0.724	0.0656	AKT3,JAK3,RALA,RRAS2
GP6 Signaling Pathway	0.717	0.0551	AKT3,COL6A2,FYB1,ITGB3,ITPR1,PRKCH,VAV2
Pyrimidine Deoxyribonucleotides De Novo Biosynthesis I	0.71	0.0909	CMPK2,DUT
Semaphorin Signaling in Neurons	0.706	0.0645	ARHGEF12,MET,PLXNA2,PLXNA3
α-Adrenergic Signaling	0.699	0.0566	ADCY3,ITPR1,PRKACB,PRKCH,RALA,RRAS2
P2Y Purigenic Receptor Signaling Pathway	0.695	0.0543	ADCY3,AKT3,ITGB3,PRKACB,PRKCH,RALA,RRAS2
April Mediated Signaling	0.693	0.0714	MAPK10,TNFSF13,TRAF3
Chondroitin and Dermatan Biosynthesis	0.693	0.167	CSGALNACT1
UDP-N-acetyl-D-glucosamine Biosynthesis II	0.693	0.167	UAP1
Tryptophan Degradation to 2-amino-3-carboxymuconate Semialdehyde	0.693	0.167	TDO2
LPS-stimulated MAPK Signaling	0.684	0.0588	MAP3K5,MAPK10,PRKCH,RALA,RRAS2
HIPPO signaling	0.684	0.0588	CD44,PPP1R14C,PPP1R3D,PPP2R2B,SMAD3
Apelin Cardiac Fibroblast Signaling Pathway	0.68	0.087	AKT3,PRKAB1
GABA Receptor Signaling	0.672	0.0534	ADCY3,CACNA2D4,CACNB4,GABRE,ITPR1,KCNN4,KCNQ3
Induction of Apoptosis by HIV1	0.658	0.0615	CASP8,CXCR4,MAP3K5,MAPK10
Regulation of eIF4 and p70S6K Signaling	0.658	0.0503	AKT3,ITGAL,ITGB3,ITGB6,ITGB7,ITGB8,PPP2R2B,RALA,RRAS2
MIF Regulation of Innate Immunity	0.654	0.0682	MAPK10,PLA2G4A,PLA2G4C
IL-22 Signaling	0.652	0.0833	AKT3,MAPK10
Tumoricidal Function of Hepatic Natural Killer Cells	0.652	0.0833	CASP8,ITGAL
Tryptophan Degradation III (Eukaryotic)	0.652	0.0833	EHHADH,TDO2
Vitamin-C Transport	0.652	0.0833	NXN,SLC2A3
Nicotine Degradation II	0.642	0.0606	CSGALNACT1,CYP4X1,CYP51A1,POR
Superpathway of Melatonin Degradation	0.642	0.0606	CSGALNACT1,CYP4X1,CYP51A1,POR
Glutamate Receptor Signaling	0.642	0.0606	GRIP1,HOMER1,HOMER3,SLC38A1
Trehalose Degradation II (Trehalase)	0.635	0.143	HK3
Thioredoxin Pathway	0.635	0.143	NXN
Glycoaminoglycan-protein Linkage Region Biosynthesis	0.635	0.143	XYLT1
Role of MAPK Signaling in Promoting the Pathogenesis of Influenza	0.629	0.0536	MAP3K5,MAPK10,PLA2G4A,PLA2G4C,RALA,RRAS2
Apelin Pancreas Signaling Pathway	0.616	0.0652	MAPK10,PRKAB1,PRKACB
ErbB4 Signaling	0.613	0.0588	NRG1,PRKCH,RALA,RRAS2
Remodeling of Epithelial Adherens Junctions	0.613	0.0588	MET,RALA,SRC,VCL
Gαi Signaling	0.6	0.0507	ADCY3,FPR1,P2RY13,PRKACB,RALA,RRAS2,SRC
Thrombin Signaling	0.597	0.0476	ADCY3,AKT3,ARHGEF12,ARHGEF5,CAMK2G,ITPR1,PRKCH,RALA,RRAS2,SRC
Amyotrophic Lateral Sclerosis Signaling	0.595	0.0522	AKT3,CACNA2D4,CACNB4,CASP1,CAT,VEGFA
GPCR-Mediated Nutrient Sensing in Enteroendocrine Cells	0.585	0.0517	ADCY3,CACNA2D4,CACNB4,ITPR1,PRKACB,PRKCH
Superoxide Radicals Degradation	0.583	0.125	CAT
Sphingomyelin Metabolism	0.583	0.125	SGMS2
nNOS Signaling in Skeletal Muscle Cells	0.582	0.0625	CACNA2D4,CACNB4,ITPR1
Non-Small Cell Lung Cancer Signaling	0.57	0.0532	AKT3,CCND1,ITPR1,RALA,RRAS2
Human Embryonic Stem Cell Pluripotency	0.562	0.0482	AKT3,BMP6,FZD5,FZD6,INHBA,PDGFB,SMAD3,TGFBR1
Xenobiotic Metabolism Signaling	0.559	0.045	CAMK2G,CAT,CHST11,CHST3,GRIP1,GSTM3,HS6ST1,MAP3K5,NDST2,PPP2R2B,PRKCH,RALA,RRAS2
HMGB1 Signaling	0.554	0.0479	AKT3,IL1R1,MAPK10,RALA,RRAS2,TNFSF10,TNFSF13,TNFSF4
Heparan Sulfate Biosynthesis (Late Stages)	0.545	0.0548	CHST11,CHST3,HS6ST1,NDST2
Triacylglycerol Degradation	0.533	0.0588	ABHD6,MGLL,NDST2
UVA-Induced MAPK Signaling	0.526	0.051	MAPK10,RALA,RPS6KA1,RPS6KA2,RRAS2
Role of MAPK Signaling in Inhibiting the Pathogenesis of Influenza	0.509	0.0526	MAP3K5,MAPK10,PLA2G4A,PLA2G4C
Stearate Biosynthesis I (Animals)	0.504	0.0566	FASN,SLC27A2,SRD5A3
Glycine Betaine Degradation	0.503	0.1	SRR
Angiopoietin Signaling	0.496	0.0519	AKT3,BIRC5,RALA,RRAS2
Phototransduction Pathway	0.491	0.0556	GUCY1A2,GUCY1B1,PRKACB
Lymphotoxin β Receptor Signaling	0.478	0.0545	AKT3,LTBR,TRAF3
EGF Signaling	0.478	0.0545	AKT3,ITPR1,SRC
Sumoylation Pathway	0.476	0.0485	DNMT3A,MAP3K5,MAPK10,SUMO4,ZEB1
GDP-glucose Biosynthesis	0.469	0.0909	HK3
Glutathione-mediated Detoxification	0.46	0.0606	GGH,GSTM3
CD27 Signaling in Lymphocytes	0.451	0.0526	CASP8,MAP3K5,MAPK10
4-1BB Signaling in T Lymphocytes	0.444	0.0588	MAP3K5,MAPK10
Cardiac Hypertrophy Signaling	0.444	0.0426	ADCY3,CACNA2D4,CACNB4,IGF1R,MAP3K5,MAPK10,PRKACB,RALA,RPS6KA1,RRAS2,TGFBR1
Pyrimidine Ribonucleotides Interconversion	0.444	0.0588	CMPK2,ENTPD1
p70S6K Signaling	0.439	0.0455	AKT3,PPP2R2B,PRKCH,RALA,RRAS2,SRC
MSP-RON Signaling Pathway	0.439	0.0517	CSF1,JAK2,RPS6KA2
Glucose and Glucose-1-phosphate Degradation	0.439	0.0833	HK3
NAD biosynthesis II (from tryptophan)	0.439	0.0833	TDO2
PPAR Signaling	0.439	0.0467	IL1R1,IL1R2,PDGFB,RALA,RRAS2
Phagosome Maturation	0.426	0.044	CTSF,CTSK,CTSV,HLA-DRA,HLA-DRB1,HLA-DRB5,RAB7B
TR/RXR Activation	0.423	0.0476	AKT3,FASN,HIF1A,LDLR
FGF Signaling	0.423	0.0476	AKT3,ITPR1,MAP3K5,MET
CCR3 Signaling in Eosinophils	0.416	0.0444	ITPR1,PLA2G4A,PLA2G4C,PRKCH,RALA,RRAS2
Retinoic acid Mediated Apoptosis Signaling	0.416	0.05	CASP8,CRABP2,TNFSF10
SPINK1 Pancreatic Cancer Pathway	0.416	0.05	MMP12,SMAD3,TGFBR1
MIF-mediated Glucocorticoid Regulation	0.412	0.0556	PLA2G4A,PLA2G4C
Pyrimidine Ribonucleotides De Novo Biosynthesis	0.412	0.0556	CMPK2,ENTPD1
Oleate Biosynthesis II (Animals)	0.411	0.0769	FADS2
Bile Acid Biosynthesis, Neutral Pathway	0.411	0.0769	CYP27A1
Sirtuin Signaling Pathway	0.4	0.0411	ABCA1,EPAS1,GADD45G,H1-1,H1-2,H1-3,H3-3A/H3-3B,H3C3,HIF1A,PDK1,PFKFB3,UQCRFS1
Superpathway of Methionine Degradation	0.398	0.0541	CBS/CBSL,CDO1
Complement System	0.398	0.0541	C2,C5AR1
Prostate Cancer Signaling	0.397	0.0446	AKT3,CCND1,CCNE2,RALA,RRAS2
Regulation Of The Epithelial Mesenchymal Transition In Development Pathway	0.395	0.046	FZD5,FZD6,HIF1A,JAG1
AMPK Signaling	0.39	0.0413	AKT3,CCNA2,CCND1,FASN,IRS2,PFKFB3,PHLPP1,PPP2R2B,PRKAB1,PRKACB
DNA Double-Strand Break Repair by Non-Homologous End Joining	0.387	0.0714	MRE11
Fatty Acid Activation	0.387	0.0714	SLC27A2
Phenylalanine Degradation IV (Mammalian, via Side Chain)	0.387	0.0714	SLC27A2
Notch Signaling	0.384	0.0526	JAG1,NOTCH3
Ceramide Signaling	0.369	0.0444	AKT3,PPP2R2B,RALA,RRAS2
Regulation of Actin-based Motility by Rho	0.367	0.0431	ITGAL,ITGB3,ITGB6,ITGB7,ITGB8
Telomere Extension by Telomerase	0.365	0.0667	MRE11
Activation of IRF by Cytosolic Pattern Recognition Receptors	0.363	0.0462	IFIT2,MAPK10,TRAF3
RANK Signaling in Osteoclasts	0.36	0.044	AKT3,MAP3K5,MAPK10,SRC
Xenobiotic Metabolism General Signaling Pathway	0.36	0.042	AKT3,GSTM3,MAP3K5,PRKCH,RALA,RRAS2
Phospholipases	0.353	0.0455	PLA2G4A,PLA2G4C,PLD4
Airway Pathology in Chronic Obstructive Pulmonary Disease	0.352	0.0424	MMP1,MMP8,TNFSF10,TNFSF13,TNFSF4
Sphingosine-1-phosphate Signaling	0.352	0.0424	ADCY3,AKT3,CASP1,CASP8,PDGFB
Mechanisms of Viral Exit from Host Cells	0.345	0.0488	LMNB1,PRKCH
Extrinsic Prothrombin Activation Pathway	0.344	0.0625	TFPI
CD40 Signaling	0.343	0.0448	JAK3,MAPK10,TRAF3
T Cell Exhaustion Signaling Pathway	0.343	0.0386	AKT3,HLA-DMA,HLA-DPA1,HLA-DPB1,HLA-DRA,HLA-DRB1,HLA-DRB5,JAK2,JAK3,KDR,MAPK10,PDCD1LG2,PDK1,PPP2R2B,RALA,RRAS2,SMAD3,STAT4,TGFBR1,TGFBR3,VEGFA
Eicosanoid Signaling	0.343	0.0448	CYSLTR2,PLA2G4A,PLA2G4C
IL-1 Signaling	0.336	0.0426	ADCY3,IL1R1,MAPK10,PRKACB
Gαs Signaling	0.332	0.0413	ADCY3,HTR7,PRKACB,RGS2,SRC
Glutaryl-CoA Degradation	0.324	0.0588	EHHADH
B Cell Activating Factor Signaling	0.322	0.0465	MAPK10,TRAF3
Small Cell Lung Cancer Signaling	0.321	0.0417	AKT3,CCND1,CCNE2,TRAF3
Death Receptor Signaling	0.321	0.0417	CASP8,MAP3K5,SPTAN1,TNFSF10
Mitochondrial L-carnitine Shuttle Pathway	0.307	0.0556	SLC27A2
Melatonin Signaling	0.3	0.0417	CAMK2G,PRKACB,PRKCH
Basal Cell Carcinoma Signaling	0.3	0.0417	BMP6,FZD5,FZD6
GPCR-Mediated Integration of Enteroendocrine Signaling Exemplified by an L Cell	0.292	0.0411	ADCY3,ITPR1,PRKACB
Role of RIG1-like Receptors in Antiviral Innate Immunity	0.291	0.0435	CASP8,TRAF3
Role of Oct4 in Mammalian Embryonic Stem Cell Pluripotency	0.291	0.0435	CCNF,KDM5B
PFKFB4 Signaling Pathway	0.291	0.0435	HK3,PRKACB
Hypoxia Signaling in the Cardiovascular System	0.284	0.0405	HIF1A,UBE2C,VEGFA
iNOS Signaling	0.281	0.0426	JAK2,JAK3
Necroptosis Signaling Pathway	0.278	0.0382	CAMK2G,CASP1,CASP8,PLA2G4A,PLA2G4C,TNFSF10
Histidine Degradation VI	0.276	0.05	CYP4X1
NER (Nucleotide Excision Repair, Enhanced Pathway)	0.273	0.0388	GTF2H1,H3-3A/H3-3B,H4C15,PRIM1
Apelin Muscle Signaling Pathway	0.272	0.0417	AKT3,PRKAB1
fMLP Signaling in Neutrophils	0.271	0.0382	FPR1,ITPR1,PRKCH,RALA,RRAS2
Signaling by Rho Family GTPases	0.271	0.0373	ARHGEF12,ARHGEF5,CDH5,CIT,ITGAL,ITGB3,ITGB6,ITGB7,ITGB8,MAPK10
Endoplasmic Reticulum Stress Pathway	0.262	0.0476	MAP3K5
Calcium Signaling	0.26	0.037	CACNA2D4,CACNB4,CAMK2G,ITPR1,MICU1,MYO10,PRKACB,TNNT1
Myc Mediated Apoptosis Signaling	0.254	0.04	CASP8,PRKACB
Telomerase Signaling	0.249	0.0374	AKT3,PPP2R2B,RALA,RRAS2
CDP-diacylglycerol Biosynthesis I	0.249	0.0455	AGPAT2
Amyloid Processing	0.246	0.0392	AKT3,PRKACB
Role of Lipids/Lipid Rafts in the Pathogenesis of Influenza	0.237	0.0435	RSAD2
Ubiquinol-10 Biosynthesis (Eukaryotic)	0.237	0.0435	CYP4X1
Ethanol Degradation IV	0.237	0.0435	CAT
Phosphatidylglycerol Biosynthesis II (Non-plastidic)	0.225	0.0417	AGPAT2
Cysteine Biosynthesis III (mammalia)	0.225	0.0417	CBS/CBSL
Transcriptional Regulatory Network in Embryonic Stem Cells	0.223	0.037	H3-3A/H3-3B,H4C15
IL-17A Signaling in Gastric Cells	0.204	0.0385	MAPK10
Role of JAK1, JAK2 and TYK2 in Interferon Signaling	0.204	0.0385	JAK2
Apelin Liver Signaling Pathway	0.204	0.0385	MAPK10
IL-10 Signaling	0	0.0278	IL1R1,IL1R2
Huntington's Disease Signaling	0	0.032	AKT3,CASP1,CASP8,IGF1R,ITPR1,PRKCH,PSMB8,PSMB9,TGM2
Mitochondrial Dysfunction	0	0.0294	CASP8,CAT,MAPK10,SURF1,UQCRFS1
VDR/RXR Activation	0	0.0128	PRKCH
PXR/RXR Activation	0	0.0308	AKT3,PRKACB
Role of NFAT in Regulation of the Immune Response	0	0.0194	AKT3,BLNK,HLA-DMA,HLA-DPA1,HLA-DPB1,HLA-DRA,HLA-DRB1,HLA-DRB5,ITPR1,RALA,RRAS2
CCR5 Signaling in Macrophages	0	0.0105	CACNA2D4,CACNB4,ITPR1,MAPK10,PRKCH
Calcium-induced T Lymphocyte Apoptosis	0	0.0183	HLA-DMA,HLA-DPA1,HLA-DPB1,HLA-DRA,HLA-DRB1,HLA-DRB5,ITPR1,PRKCH
Cytotoxic T Lymphocyte-mediated Apoptosis of Target Cells	0	0.00248	CASP8
CTLA4 Signaling in Cytotoxic T Lymphocytes	0	0.00658	AKT3,JAK2,PPP2R2B
Airway Inflammation in Asthma	0	0.0312	RNASE2
T Helper Cell Differentiation	0	0.0178	HLA-DMA,HLA-DPA1,HLA-DPB1,HLA-DRA,HLA-DRB1,HLA-DRB5,STAT4,TGFBR1
CD28 Signaling in T Helper Cells	0	0.0202	AKT3,HLA-DMA,HLA-DPA1,HLA-DPB1,HLA-DRA,HLA-DRB1,HLA-DRB5,ITPR1,MALT1,MAPK10
Dendritic Cell Maturation	0	0.0265	AKT3,CD1B,CD1C,CD1D,CD83,HLA-DMA,HLA-DPA1,HLA-DPB1,HLA-DRA,HLA-DRB1,HLA-DRB5,JAK2,LTBR,MAPK10,STAT4
iCOS-iCOSL Signaling in T Helper Cells	0	0.0227	AKT3,CAMK2G,HLA-DMA,HLA-DPA1,HLA-DPB1,HLA-DRA,HLA-DRB1,HLA-DRB5,INPP5D,ITPR1,PLEKHA1
Lipid Antigen Presentation by CD1	0	0.00761	CD1B,CD1C,CD1D
Polyamine Regulation in Colon Cancer	0	0.0323	PSMB8,PSMB9
Aldosterone Signaling in Epithelial Cells	0	0.0366	ASIC1,DNAJB13,DUSP1,ITPR1,KCNMA1,PRKCH
Type I Diabetes Mellitus Signaling	0	0.0287	CASP8,HLA-DMA,HLA-DPA1,HLA-DPB1,HLA-DRA,HLA-DRB1,HLA-DRB5,ICA1,IL1R1,JAK2,MAP3K5,MAPK10,PTPRN,SOCS2
Allograft Rejection Signaling	0	0.013	HLA-DMA,HLA-DPA1,HLA-DPB1,HLA-DRA,HLA-DRB1,HLA-DRB5
Autoimmune Thyroid Disease Signaling	0	0.0139	HLA-DMA,HLA-DPA1,HLA-DPB1,HLA-DRA,HLA-DRB1,HLA-DRB5
Graft-versus-Host Disease Signaling	0	0.0142	HLA-DMA,HLA-DPA1,HLA-DPB1,HLA-DRA,HLA-DRB1,HLA-DRB5
G Protein Signaling Mediated by Tubby	0	0.0227	JAK2
Communication between Innate and Adaptive Immune Cells	0	0.0127	CD83,HLA-DRA,HLA-DRB1,HLA-DRB5,TLR10,TNFSF13
Systemic Lupus Erythematosus Signaling	0	0.00835	AKT3,CREM,INPP5D,RALA,RRAS2
Cdc42 Signaling	0	0.0307	FNBP1L,HLA-DMA,HLA-DPA1,HLA-DPB1,HLA-DRA,HLA-DRB1,HLA-DRB5,IQGAP2,ITGAL,ITGB3,ITGB6,ITGB7,ITGB8,MAPK10,RALA,SRC,VAV2
EIF2 Signaling	0	0.0312	AKT3,ATF3,CCND1,IGF1R,RALA,RRAS2,VEGFA
Phospholipase C Signaling	0	0.0291	ADCY3,AHNAK,ARHGEF12,ARHGEF5,BLNK,ITGAL,ITGB3,ITGB6,ITGB7,ITGB8,ITPR1,PLA2G4A,PLA2G4C,PLD4,PRKCH,RALA,RRAS2,SRC,TGM2
Altered T Cell and B Cell Signaling in Rheumatoid Arthritis	0	0.0213	CSF1,HLA-DMA,HLA-DPA1,HLA-DPB1,HLA-DRA,HLA-DRB1,HLA-DRB5,TLR10,TNFSF13,TRAF3
Neuroprotective Role of THOP1 in Alzheimer's Disease	0	0.0169	DPP4,PRKACB
Regulation of IL-2 Expression in Activated and Anergic T Lymphocytes	0	0.0152	MALT1,MAPK10,RALA,RRAS2,SMAD3,TGFBR1,VAV2
Role of Wnt/GSK-3β Signaling in the Pathogenesis of Influenza	0	0.0256	FZD5,FZD6
Nur77 Signaling in T Lymphocytes	0	0.0184	HLA-DMA,HLA-DPA1,HLA-DPB1,HLA-DRA,HLA-DRB1,HLA-DRB5,PDK1,PRKCH,TNFSF10
PKCθ Signaling in T Lymphocytes	0	0.028	CACNA2D4,CACNB4,CAMK2G,HLA-DMA,HLA-DPA1,HLA-DPB1,HLA-DRA,HLA-DRB1,HLA-DRB5,ITPR1,MALT1,MAP3K5,RALA,RRAS2,VAV2
TNFR1 Signaling	0	0.0192	CASP8
Role of PI3K/AKT Signaling in the Pathogenesis of Influenza	0	0.0152	AKT3
Antiproliferative Role of TOB in T Cell Signaling	0	0.0149	CCNA1,CCNA2,CCNE2,RPS6KA1,SMAD3,TGFBR1
OX40 Signaling Pathway	0	0.0197	HLA-DMA,HLA-DPA1,HLA-DPB1,HLA-DRA,HLA-DRB1,HLA-DRB5,MAPK10,TNFSF4,TRAF3
Assembly of RNA Polymerase II Complex	0	0.02	GTF2H1
Hematopoiesis from Pluripotent Stem Cells	0	0.00478	CSF1,KITLG
nNOS Signaling in Neurons	0	0.0213	PRKCH
Ephrin A Signaling	0	0.0213	VAV2
Ephrin B Signaling	0	0.0278	CXCR4,VAV2
Thyroid Hormone Metabolism II (via Conjugation and/or Degradation)	0	0.0256	CSGALNACT1
tRNA Charging	0	0.0256	IARS1
Serotonin Degradation	0	0.0147	CSGALNACT1
Gαq Signaling	0	0.0294	AKT3,ITPR1,PLD4,PRKCH,RGS2
Tec Kinase Signaling	0	0.0234	ITGAL,ITGB3,ITGB6,ITGB7,ITGB8,JAK2,JAK3,MAPK10,PRKCH,SRC,STAT4,TNFSF10,VAV2
Oxidative Phosphorylation	0	0.0183	SURF1,UQCRFS1
Unfolded protein response	0	0.0222	DNAJB13,MAP3K5
Wnt/Ca+ pathway	0	0.0312	FZD5,FZD6
Toll-like Receptor Signaling	0	0.0128	TLR10
Nucleotide Excision Repair Pathway	0	0.0286	GTF2H1
SAPK/JNK Signaling	0	0.0104	MAP3K5,MAP4K5,MAPK10,RALA,RRAS2
Protein Ubiquitination Pathway	0	0.0255	CDC20,DNAJB13,ELOB,PSMB8,PSMB9,UBE2C,USP45
NF-κB Signaling	0	0.0292	AKT3,CASP8,IGF1R,IGF2R,IL1R1,IL1R2,KDR,LTBR,MALT1,PRKACB,RALA,RRAS2,TGFBR1,TGFBR3,TLR10,TRAF3
T Cell Receptor Signaling	0	0.0253	AKT3,FYB1,HLA-DMA,HLA-DPA1,HLA-DPB1,HLA-DRA,HLA-DRB1,HLA-DRB5,ITGAL,MALT1,PAG1,PDK1,RALA,RRAS2,VAV2
Th17 Activation Pathway	0	0.0108	HIF1A,IL1R1,JAK2,JAK3,STAT4
BAG2 Signaling Pathway	0	0.0238	PSMB8,PSMB9
FAT10 Signaling Pathway	0	0.0357	PSMB8,PSMB9
Systemic Lupus Erythematosus In T Cell Signaling Pathway	0	0.0276	AKT3,CASP1,CASP8,CD44,CREM,HLA-DMA,HLA-DPA1,HLA-DPB1,HLA-DRA,HLA-DRB1,HLA-DRB5,ITGAL,ITPR1,PDK1,PPP2R2B,RALA,RRAS2
Xenobiotic Metabolism AHR Signaling Pathway	0	0.0115	GSTM3
