# Supplementary material for: C5a Activates a Pro-Inflammatory Gene Expression Profile in Human Gaucher iPSC-Derived Macrophages
Source: Int J Mol Sci. 2021 Sep 14;22(18):9912. doi: 10.3390/ijms22189912 (PMC8466165; doi:10.3390/ijms22189912)
Supplement: Supplementary file 1 [file ijms-22-09912-s001.zip › Supplemental Table S4B.xls]

## Sheet: Sheet0
Ingenuity Canonical Pathways	-log(p-value)	Ratio	Molecules
Antigen Presentation Pathway	8.34	0.308	CD74,CIITA,HLA-DMA,HLA-DMB,HLA-DPA1,HLA-DPB1,HLA-DQA1,HLA-DRA,HLA-DRB1,HLA-DRB5,PSMB8,PSMB9
Th1 Pathway	7.44	0.157	CD274,CD40,DLL1,DLL4,HLA-DMA,HLA-DMB,HLA-DPA1,HLA-DPB1,HLA-DQA1,HLA-DRA,HLA-DRB1,HLA-DRB5,IL18R1,IL27RA,IRF1,JAK2,NFIL3,NOTCH1,PIK3CD
Th1 and Th2 Activation Pathway	6.9	0.129	BHLHE41,CD274,CD40,DLL1,DLL4,HLA-DMA,HLA-DMB,HLA-DPA1,HLA-DPB1,HLA-DQA1,HLA-DRA,HLA-DRB1,HLA-DRB5,IL18R1,IL27RA,IRF1,JAK2,JUN,NFIL3,NOTCH1,PIK3CD,TGFBR1
Hepatic Fibrosis Signaling Pathway	6.35	0.0899	AGT,BCL2,CD40,EDN1,EDNRA,FOS,FZD6,IL1R1,IL1R2,IL1RN,ITGA6,ITGA9,JAK2,JUN,MMP1,MYL6,MYLK2,MYLK3,NFKBID,PDGFA,PDGFC,PIK3CD,PPARG,PRKACB,PRKCA,PRKCH,RHOBTB2,SMAD3,SMO,TFRC,TGFB3,TGFBR1,TNF,WNT5A
Role of Osteoblasts, Osteoclasts and Chondrocytes in Rheumatoid Arthritis	6.19	0.11	ACP5,BCL2,BMP2,BMP6,CSF1,CTSK,DKK2,FOS,FZD6,IL18R1,IL1R1,IL1R2,IL1RN,IL7,JUN,LRP1,MMP1,MMP8,NFKBID,PIK3CD,SMO,TNF,TNFRSF11A,WNT5A
LPS/IL-1 Mediated Inhibition of RXR Function	5.94	0.107	ABCA1,ACOX1,ALDH1A2,ALDH2,ALDH4A1,APOC2,APOE,CAT,CPT1A,FABP4,FABP5,FMO4,GSTM3,HS3ST1,HS6ST1,IL1R1,IL1R2,IL1RN,JUN,LY96,NDST2,SCARB1,SULT1A2,TNF
MSP-RON Signaling In Macrophages Pathway	5.74	0.142	CIITA,FOS,HLA-DMA,HLA-DMB,HLA-DPA1,HLA-DPB1,HLA-DQA1,HLA-DRA,HLA-DRB1,HLA-DRB5,JAK2,JUN,PIK3CD,PTGS2,ST14,TNF
Colorectal Cancer Metastasis Signaling	5.55	0.0988	ADCY3,BIRC5,FOS,FZD6,GNG7,JAK2,JUN,LRP1,MMP1,MMP15,MMP7,MMP8,PDGFC,PIK3CD,PRKACB,PTGS2,RHOBTB2,SMAD3,SMO,TGFB3,TGFBR1,TLR5,TNF,TP53,WNT5A
PD-1, PD-L1 cancer immunotherapy pathway	5.42	0.142	CD274,HLA-DMA,HLA-DMB,HLA-DPA1,HLA-DPB1,HLA-DQA1,HLA-DRA,HLA-DRB1,HLA-DRB5,JAK2,PDCD1LG2,PIK3CD,SMAD3,TGFB3,TNF
RAR Activation	5.38	0.108	ADCY3,ALDH1A2,BMP2,CCNH,CRABP2,CSF2RB,DUSP1,FOS,GTF2H1,JAK2,JUN,MMP1,PIK3CD,PRKACB,PRKCA,PRKCH,RDH10,RPL7A,SMAD3,TGFB3,TRIM24
Hepatic Fibrosis / Hepatic Stellate Cell Activation	5.11	0.108	AGT,BCL2,CD40,COL6A1,COL6A2,CSF1,EDN1,EDNRA,IL1R1,IL1R2,LY96,MET,MMP1,MYL6,PDGFA,PDGFC,SMAD3,TGFB3,TGFBR1,TNF
Molecular Mechanisms of Cancer	4.95	0.08	ADCY3,ARHGEF12,BCL2,BMP2,BMP6,CDK1,CDK15,CDKN2C,FOS,FYN,FZD6,ITGA6,ITGA9,JAK2,JUN,LRP1,MDM2,NFKBID,NOTCH1,PIK3CD,PRKACB,PRKCA,PRKCH,RASA1,RASGRF2,RHOBTB2,SMAD3,SMO,TGFB3,TGFBR1,TP53,WNT5A
Th2 Pathway	4.69	0.118	BHLHE41,CD40,DLL1,HLA-DMA,HLA-DMB,HLA-DPA1,HLA-DPB1,HLA-DQA1,HLA-DRA,HLA-DRB1,HLA-DRB5,JAK2,JUN,NOTCH1,PIK3CD,TGFBR1
B Cell Development	4.59	0.222	CD40,HLA-DMA,HLA-DMB,HLA-DQA1,HLA-DRA,HLA-DRB1,HLA-DRB5,IL7
Osteoarthritis Pathway	4.54	0.0955	BMP2,DDIT4,EPAS1,FZD6,IL1R1,IL1R2,ITGA6,ITGA9,LRP1,MMP1,NOTCH1,P2RX7,PDGFC,PPARG,PTGS2,S100A8,S100A9,SMAD3,SMO,TGFBR1,TNF
Production of Nitric Oxide and Reactive Oxygen Species in Macrophages	4.47	0.101	APOC2,APOE,CAT,FOS,IRF1,JAK2,JUN,LYZ,MAP3K8,NCF4,NFKBID,PIK3CD,PPP1R14C,PPP1R3D,PRKCA,PRKCH,RHOBTB2,S100A8,TNF
Atherosclerosis Signaling	4.46	0.118	APOC2,APOE,CD40,CSF1,IL1RN,LPL,LYZ,MMP1,PDGFA,PDGFC,PLA2G4C,PNPLA3,S100A8,SELPLG,TNF
Tumor Microenvironment Pathway	4.37	0.102	BCL2,CD274,CSF1,FOS,JAK2,JUN,MMP1,MMP15,MMP7,MMP8,PDCD1LG2,PDGFA,PDGFC,PIK3CD,PLAU,PTGS2,TGFB3,TNF
Kinetochore Metaphase Signaling Pathway	4.33	0.129	BIRC5,CCNB1,CDCA8,CDK1,CENPE,CENPK,CENPW,KIF2C,MAD2L1,PPP1R14C,PPP1R3D,PTTG1,TTK
IL-12 Signaling and Production in Macrophages	4.22	0.113	APOC2,APOE,CD40,FOS,IRF1,JUN,LYZ,MAP3K8,PIK3CD,PPARG,PRKCA,PRKCH,S100A8,TGFB3,TNF
Altered T Cell and B Cell Signaling in Rheumatoid Arthritis	4.2	0.133	CD40,CSF1,HLA-DMA,HLA-DMB,HLA-DQA1,HLA-DRA,HLA-DRB1,HLA-DRB5,IL1RN,TLR5,TNF,TNFSF13
Protein Kinase A Signaling	4.16	0.075	ADCY3,AKAP3,CDKN3,CREM,DUSP1,DUSP10,DUSP12,DUSP16,DUSP2,DUSP5,GNG7,H1-1,H3C3,MYL6,MYLK2,MYLK3,NFKBID,PDE1B,PDE9A,PPP1R14C,PPP1R3D,PRKACB,PRKCA,PRKCH,PTGS2,PTPN2,SMAD3,SMO,TGFB3,TGFBR1
PI3K/AKT Signaling	4.12	0.0978	BCL2,CSF2RB,IFNLR1,IL18R1,IL1R1,IL1R2,IL27RA,INPP5D,INPP5F,ITGA6,ITGA9,JAK2,MAP3K8,MDM2,NFKBID,PIK3CD,PTGS2,TP53
LXR/RXR Activation	4.1	0.116	ABCA1,AGT,APOC2,APOE,IL1R1,IL1R2,IL1RN,LPL,LY96,LYZ,PTGS2,S100A8,SERPINF1,TNF
Glucocorticoid Receptor Signaling	4.1	0.0714	ADRB2,AGT,BCL2,CCNH,CSF2RB,DUSP1,FBP1,FOS,GTF2H1,IFNLR1,IL18R1,IL1R1,IL1R2,IL1RN,IL27RA,JAK2,JUN,MMP1,MMP8,NCOA2,NFKBID,PIK3CD,PLA2G4C,PLAU,POLR2A,PPARG,PRKACB,PTGS2,SMAD3,TGFB3,TGFBR1,TNF,UQCRFS1
MIF Regulation of Innate Immunity	4.08	0.19	CD74,FOS,JUN,LY96,NFKBID,PLA2G4C,PTGS2,TP53
Pancreatic Adenocarcinoma Signaling	3.99	0.119	BCL2,BIRC5,HBEGF,JAK2,MDM2,NOTCH1,PDGFC,PIK3CD,PTGS2,SMAD3,TGFB3,TGFBR1,TP53
Role of Macrophages, Fibroblasts and Endothelial Cells in Rheumatoid Arthritis	3.97	0.0796	CSF1,DKK2,FOS,FZD6,IL18R1,IL1R1,IL1R2,IL1RN,IL7,JAK2,JUN,LRP1,LTBR,MMP1,NFKBID,PDGFA,PDGFC,PIK3CD,PRKCA,PRKCH,ROR2,SMO,TLR5,TNF,WNT5A
Aryl Hydrocarbon Receptor Signaling	3.86	0.105	ALDH1A2,ALDH2,ALDH4A1,CCNA1,CYP1B1,DHFR,FOS,GSTM3,JUN,MDM2,NCOA2,NQO1,TGFB3,TNF,TP53
Cardiac Hypertrophy Signaling (Enhanced)	3.84	0.0684	ADCY3,ADRB2,AGT,CSF2RB,EDN1,EDNRA,FZD6,GNG7,HDAC9,IFNLR1,IL18R1,IL1R1,IL1R2,IL27RA,INPP5F,ITGA6,ITGA9,JAK2,JUN,MAP3K8,PDE1B,PDE9A,PIK3CD,PRKACB,PRKCA,PRKCH,PTGS2,RCAN1,SMO,TGFB3,TGFBR1,TNF,TNFSF13,WNT5A
T Helper Cell Differentiation	3.69	0.137	CD40,HLA-DMA,HLA-DMB,HLA-DQA1,HLA-DRA,HLA-DRB1,HLA-DRB5,IL18R1,TGFBR1,TNF
Graft-versus-Host Disease Signaling	3.65	0.167	HLA-DMA,HLA-DMB,HLA-DQA1,HLA-DRA,HLA-DRB1,HLA-DRB5,IL1RN,TNF
Axonal Guidance Signaling	3.56	0.0668	ADAM23,ADAM32,ADAMDEC1,ADAMTS12,ARHGEF12,BMP2,BMP6,EPHB2,FYN,FZD6,GNG7,ITGA6,ITGA9,MET,MMP1,MMP15,MMP7,MMP8,MYL6,NCK1,NRP1,PDGFA,PDGFC,PIK3CD,PRKACB,PRKCA,PRKCH,RASA1,SEMA4D,SMO,SRGAP3,UNC5B,WNT5A
OX40 Signaling Pathway	3.55	0.122	BCL2,HLA-DMA,HLA-DMB,HLA-DPA1,HLA-DPB1,HLA-DQA1,HLA-DRA,HLA-DRB1,HLA-DRB5,JUN,NFKBID
Regulation Of The Epithelial Mesenchymal Transition By Growth Factors Pathway	3.51	0.0904	DOCK10,EGR1,FOS,JAK2,JUN,MET,MMP1,PDGFA,PDGFC,PIK3CD,SMAD3,TGFB3,TGFBR1,TNF,TNFSF12-TNFSF13,TNFSF13,TNFSF18
PKCθ Signaling in T Lymphocytes	3.48	0.0968	CACNA2D4,CACNB4,FOS,FYN,HLA-DMA,HLA-DMB,HLA-DQA1,HLA-DRA,HLA-DRB1,HLA-DRB5,JUN,MAP3K8,NFKBID,PIK3CD,VAV2
Neuroinflammation Signaling Pathway	3.46	0.0767	BCL2,BIRC5,CD40,FOS,GRIN2A,HLA-DMA,HLA-DMB,HLA-DQA1,HLA-DRA,HLA-DRB1,HLA-DRB5,IL1R1,JAK2,JUN,MFGE8,P2RX7,PIK3CD,PLA2G4C,PTGS2,TGFB3,TGFBR1,TLR5,TNF
T Cell Exhaustion Signaling Pathway	3.39	0.0914	CD274,FOS,HLA-DMA,HLA-DMB,HLA-DPA1,HLA-DPB1,HLA-DQA1,HLA-DRA,HLA-DRB1,HLA-DRB5,JAK2,JUN,PDCD1LG2,PIK3CD,SMAD3,TGFBR1
Cdc42 Signaling	3.36	0.0909	FOS,HLA-DMA,HLA-DMB,HLA-DPA1,HLA-DPB1,HLA-DQA1,HLA-DRA,HLA-DRB1,HLA-DRB5,IQGAP2,ITGA6,ITGA9,JUN,MYL6,RASA1,VAV2
HER-2 Signaling in Breast Cancer	3.35	0.0876	AREG,BIRC5,ELF1,FOS,FRK,FYN,HBEGF,JUN,MDM2,NFKBID,NRG1,PIK3CD,PRKCA,PRKCH,PTGS2,SMAD3,TP53
Type I Diabetes Mellitus Signaling	3.33	0.108	BCL2,HLA-DMA,HLA-DMB,HLA-DQA1,HLA-DRA,HLA-DRB1,HLA-DRB5,IL1R1,IRF1,JAK2,NFKBID,TNF
Dendritic Cell Maturation	3.15	0.087	CD1B,CD1C,CD40,FCGR2B,HLA-DMA,HLA-DMB,HLA-DQA1,HLA-DRA,HLA-DRB1,HLA-DRB5,IL1RN,JAK2,LTBR,NFKBID,PIK3CD,TNF
IL-4 Signaling	3.15	0.118	HLA-DMA,HLA-DMB,HLA-DQA1,HLA-DRA,HLA-DRB1,HLA-DRB5,INPP5D,INPP5F,JAK2,PIK3CD
Allograft Rejection Signaling	3.11	0.116	CD40,HLA-DMA,HLA-DMB,HLA-DPA1,HLA-DPB1,HLA-DQA1,HLA-DRA,HLA-DRB1,HLA-DRB5,TNF
PDGF Signaling	3.11	0.116	FOS,INPP5D,INPP5F,JAK2,JUN,PDGFA,PDGFC,PIK3CD,PRKCA,RASA1
Adipogenesis pathway	3.1	0.097	BMP2,CCNH,FABP4,FZD6,GTF2H1,HDAC9,LPL,PPARG,SMAD3,SMO,TNF,TP53,WNT5A
HIF1α Signaling	3.08	0.0829	BMP6,CAMK1D,EDN1,HK2,JUN,LDHA,MDM2,MET,MMP1,MMP15,MMP7,MMP8,PDGFC,PIK3CD,PRKCA,PRKCH,TP53
STAT3 Pathway	3.07	0.0963	BCL2,BMP6,CSF2RB,IFNLR1,IGF2R,IL18R1,IL1R1,IL1R2,IL27RA,JAK2,PTPN2,TGFBR1,TNFRSF11A
NRF2-mediated Oxidative Stress Response	3.03	0.0847	CAT,DNAJA4,DNAJC7,ENC1,EPHX1,FOS,GCLC,GSTM3,JUN,JUND,NQO1,PIK3CD,PPIB,PRKCA,PRKCH,SCARB1
Crosstalk between Dendritic Cells and Natural Killer Cells	2.99	0.112	CD209,CD226,CD40,CSF2RB,HLA-DRA,HLA-DRB1,HLA-DRB5,LTBR,MICB,TNF
Granulocyte Adhesion and Diapedesis	2.98	0.0867	CCL1,CCL24,CDH5,CLDN4,CXCL5,FPR3,IL1R1,IL1R2,IL1RN,MMP1,MMP15,MMP7,MMP8,SELPLG,TNF
PPAR Signaling	2.98	0.105	FOS,IL1R1,IL1R2,IL1RN,JUN,NFKBID,PDGFA,PDGFC,PPARG,PTGS2,TNF
Semaphorin Neuronal Repulsive Signaling Pathway	2.95	0.0935	ARHGEF12,DPYSL3,FYN,GUCY1A2,ITGA6,ITGA9,MYL6,NRP1,PIK3CD,PRKACB,SEMA4D,TP53,VCAN
Interferon Signaling	2.87	0.167	BCL2,IFITM3,IRF1,JAK2,PSMB8,PTPN2
Autoimmune Thyroid Disease Signaling	2.85	0.143	CD40,HLA-DMA,HLA-DMB,HLA-DQA1,HLA-DRA,HLA-DRB1,HLA-DRB5
NF-κB Signaling	2.83	0.0838	BMP2,CD40,IGF2R,IL1R1,IL1R2,IL1RN,LTBR,MAP3K8,NFKBID,PIK3CD,PRKACB,TGFBR1,TLR5,TNF,TNFRSF11A
Cyclins and Cell Cycle Regulation	2.71	0.111	CCNA1,CCNB1,CCNB2,CCNH,CDK1,CDKN2C,HDAC9,TGFB3,TP53
Calcium-induced T Lymphocyte Apoptosis	2.71	0.121	HLA-DMA,HLA-DMB,HLA-DQA1,HLA-DRA,HLA-DRB1,HLA-DRB5,PRKCA,PRKCH
UVB-Induced MAPK Signaling	2.69	0.135	FOS,H3C3,JUN,PIK3CD,PRKCA,PRKCH,TP53
Hepatic Cholestasis	2.67	0.0806	ADCY3,CYP27A1,IL1R1,IL1R2,IL1RN,JUN,LY96,NFKBID,PRKACB,PRKCA,PRKCH,SLCO3A1,TGFB3,TNF,TNFSF13
Cell Cycle: G1/S Checkpoint Regulation	2.67	0.119	CDKN2C,HDAC9,MDM2,NRG1,RPL5,SMAD3,TGFB3,TP53
Tight Junction Signaling	2.66	0.0833	CLDN4,EPB41,FOS,JAM2,JUN,MYL6,NECTIN1,PRKACB,SPTAN1,TGFB3,TGFBR1,TNF,VAPA,VCL
Role of Tissue Factor in Cancer	2.63	0.0948	CSF1,EGR1,FRK,FYN,HBEGF,ITGA6,JAK2,MMP1,PIK3CD,PRKCA,TP53
Histamine Degradation	2.62	0.235	ALDH1A2,ALDH2,ALDH4A1,AOC1
Xenobiotic Metabolism Signaling	2.59	0.0697	ALDH1A2,ALDH2,ALDH4A1,CAMK1D,CAT,CYP1B1,DNAJC7,FMO4,GCLC,GSTM3,HS3ST1,HS6ST1,MAP3K8,NDST2,NQO1,PIK3CD,PRKCA,PRKCH,SULT1A2,TNF
Estrogen Receptor Signaling	2.59	0.0671	ADCY3,AGT,BCL2,FOS,GNG7,IGF2R,JAK2,JUN,MMP1,MMP15,MMP7,MMP8,MYL6,NCOA2,NOTCH1,PDGFC,PIK3CD,PRKACB,PRKCA,PRKCH,TP53,UQCRFS1
p38 MAPK Signaling	2.57	0.0932	DUSP1,DUSP10,H3C3,IL1R1,IL1R2,IL1RN,PLA2G4C,TGFB3,TGFBR1,TNF,TP53
Androgen Signaling	2.56	0.0882	CACNA2D4,CACNB4,CCNH,GNG7,GTF2H1,JUN,NCOA2,POLR2A,PRKACB,PRKCA,PRKCH,SMAD3
IL-10 Signaling	2.55	0.114	FCGR2B,FOS,IL1R1,IL1R2,IL1RN,JUN,NFKBID,TNF
Erythropoietin Signaling Pathway	2.54	0.0809	CSF2RB,FOS,JAK2,JUN,MACROH2A2,MDM2,NFKBID,PIK3CD,PRKCA,PRKCH,TGFB3,TNF,TNFSF13,TP53
Tec Kinase Signaling	2.54	0.0809	FOS,FRK,FYN,GNG7,ITGA6,ITGA9,JAK2,PIK3CD,PRKCA,PRKCH,RHOBTB2,TNF,TNFRSF10A,VAV2
Xenobiotic Metabolism PXR Signaling Pathway	2.53	0.0781	ALDH1A2,ALDH2,ALDH4A1,CAT,DNAJC7,GSTM3,HS3ST1,HS6ST1,NDST2,PPP1R14C,PPP1R3D,PRKACB,PRKCA,PRKCH,SULT1A2
Iron homeostasis signaling pathway	2.53	0.0876	ATP6V0D2,BMP2,BMP6,EPAS1,JAK2,LRP1,PDGFA,SLC25A37,SLC40A1,SLC48A1,SMAD3,TFRC
HGF Signaling	2.51	0.0917	ELF1,FOS,ITGA6,ITGA9,JUN,MAP3K8,MET,PIK3CD,PRKCA,PRKCH,PTGS2
Leukocyte Extravasation Signaling	2.51	0.0777	CDH5,CLDN4,JAM2,MMP1,MMP15,MMP7,MMP8,MYL6,NCF4,PIK3CD,PRKCA,PRKCH,SELPLG,VAV2,VCL
Agranulocyte Adhesion and Diapedesis	2.51	0.0777	CCL1,CCL24,CDH5,CLDN4,CXCL5,IL1R1,IL1RN,ITGA6,MMP1,MMP15,MMP7,MMP8,MYL6,SELPLG,TNF
3-phosphoinositide Degradation	2.5	0.0833	ACP5,DUSP1,DUSP10,DUSP12,DUSP16,DUSP2,DUSP5,INPP5D,INPP5F,MTMR6,PPM1H,PTPN2,RASA1
CD28 Signaling in T Helper Cells	2.49	0.0909	FOS,FYN,HLA-DMA,HLA-DMB,HLA-DQA1,HLA-DRA,HLA-DRB1,HLA-DRB5,JUN,NFKBID,PIK3CD
Ovarian Cancer Signaling	2.48	0.0863	BCL2,EDN1,EDNRA,FZD6,MMP7,PDGFC,PIK3CD,PRKACB,PTGS2,SMO,TP53,WNT5A
Systemic Lupus Erythematosus In B Cell Signaling Pathway	2.45	0.0691	BCL2,CD40,FCGR2B,FOS,FYN,IFIH1,INPP5D,INPP5F,JAK2,JUN,LILRA6,LILRB3,LILRB4,PIK3CD,PRKCA,PRKCH,TGFB3,TNF,TNFSF13
DNA damage-induced 14-3-3σ Signaling	2.44	0.211	CCNB1,CCNB2,CDK1,TP53
D-myo-inositol (1,4,5,6)-Tetrakisphosphate Biosynthesis	2.4	0.0845	ACP5,DUSP1,DUSP10,DUSP12,DUSP16,DUSP2,DUSP5,INPP5F,MTMR6,PPM1H,PTPN2,RASA1
D-myo-inositol (3,4,5,6)-tetrakisphosphate Biosynthesis	2.4	0.0845	ACP5,DUSP1,DUSP10,DUSP12,DUSP16,DUSP2,DUSP5,INPP5F,MTMR6,PPM1H,PTPN2,RASA1
Hypoxia Signaling in the Cardiovascular System	2.39	0.108	EDN1,JUN,LDHA,MDM2,NFKBID,NQO1,TP53,UBE2J1
Role of NFAT in Regulation of the Immune Response	2.36	0.0773	FCGR2B,FOS,FYN,GNG7,HLA-DMA,HLA-DMB,HLA-DQA1,HLA-DRA,HLA-DRB1,HLA-DRB5,JUN,NFKBID,PIK3CD,RCAN1
iNOS Signaling	2.36	0.133	FOS,IRF1,JAK2,JUN,LY96,NFKBID
FXR/RXR Activation	2.35	0.0873	AGT,APOC2,APOE,CYP27A1,FBP1,IL1RN,LPL,PPARG,SCARB1,SERPINF1,TNF
Fatty Acid α-oxidation	2.35	0.2	ALDH1A2,ALDH2,ALDH4A1,PTGS2
Semaphorin Signaling in Neurons	2.34	0.117	ARHGEF12,DPYSL3,FYN,MET,NRP1,RHOBTB2,SEMA4D
Corticotropin Releasing Hormone Signaling	2.33	0.0828	ADCY3,CACNA2D4,CACNB4,FOS,GUCY1A2,JUN,JUND,PRKACB,PRKCA,PRKCH,PTGS2,SMO
ERK/MAPK Signaling	2.33	0.0743	DUSP1,DUSP2,ELF1,FOS,FYN,H3C3,ITGA6,ITGA9,PIK3CD,PLA2G4C,PPARG,PPP1R14C,PPP1R3D,PRKACB,PRKCA
FAT10 Cancer Signaling Pathway	2.31	0.13	MAD2L1,SMAD3,TGFB3,TGFBR1,TNF,TP53
Glioma Signaling	2.31	0.0909	CAMK1D,CDKN2C,IGF2R,MDM2,PDGFA,PDGFC,PIK3CD,PRKCA,PRKCH,TP53
iCOS-iCOSL Signaling in T Helper Cells	2.28	0.0901	CD40,HLA-DMA,HLA-DMB,HLA-DQA1,HLA-DRA,HLA-DRB1,HLA-DRB5,INPP5D,NFKBID,PIK3CD
3-phosphoinositide Biosynthesis	2.28	0.0783	ACP5,DUSP1,DUSP10,DUSP12,DUSP16,DUSP2,DUSP5,INPP5F,MTMR6,PIK3CD,PPM1H,PTPN2,RASA1
ErbB Signaling	2.27	0.0957	AREG,FOS,HBEGF,JUN,NCK1,NRG1,PIK3CD,PRKCA,PRKCH
GPCR-Mediated Nutrient Sensing in Enteroendocrine Cells	2.25	0.0893	ADCY3,CACNA2D4,CACNB4,FFAR2,FFAR3,FFAR4,GNG7,PRKACB,PRKCA,PRKCH
Inhibition of Angiogenesis by TSP1	2.22	0.147	FYN,GUCY1A2,JUN,TGFBR1,TP53
MIF-mediated Glucocorticoid Regulation	2.22	0.147	CD74,LY96,NFKBID,PLA2G4C,PTGS2
IL-3 Signaling	2.22	0.101	CSF2RB,FOS,INPP5D,JAK2,JUN,PIK3CD,PRKCA,PRKCH
Cell Cycle: G2/M DNA Damage Checkpoint Regulation	2.17	0.122	CCNB1,CCNB2,CDK1,MDM2,MDM4,TP53
PPARα/RXRα Activation	2.16	0.0733	ABCA1,ACOX1,ADCY3,IL1R1,IL1R2,JAK2,JUN,LPL,NFKBID,PRKACB,PRKCA,SMAD3,TGFB3,TGFBR1
p53 Signaling	2.16	0.0918	BCL2,BIRC5,HDAC9,JUN,MDM2,MDM4,PIK3CD,TNFRSF10A,TP53
Prolactin Signaling	2.16	0.0988	FOS,FYN,IRF1,JAK2,JUN,PIK3CD,PRKCA,PRKCH
NAD biosynthesis II (from tryptophan)	2.14	0.25	KMO,QPRT,TDO2
Myc Mediated Apoptosis Signaling	2.13	0.12	ADRB2,BCL2,MDM2,PRKACB,TNF,TP53
Human Embryonic Stem Cell Pluripotency	2.13	0.0815	BMP2,BMP6,FZD6,PDGFA,PDGFC,PIK3CD,SMAD3,SMO,TGFB3,TGFBR1,WNT5A
Ethanol Degradation IV	2.12	0.174	ALDH1A2,ALDH2,ALDH4A1,CAT
IL-17A Signaling in Fibroblasts	2.12	0.139	CXCL5,FOS,JUN,MMP1,NFKBID
Sertoli Cell-Sertoli Cell Junction Signaling	2.1	0.0722	CLDN4,EPB41,GUCY1A2,ITGA6,ITGA9,JAM2,JUN,MAP3K8,NECTIN1,PRKACB,SPTAN1,TGFB3,TNF,VCL
Renin-Angiotensin Signaling	2.1	0.0847	ADCY3,AGT,FOS,JAK2,JUN,PIK3CD,PRKACB,PRKCA,PRKCH,TNF
D-myo-inositol-5-phosphate Metabolism	2.06	0.0764	ACP5,DUSP1,DUSP10,DUSP12,DUSP16,DUSP2,DUSP5,INPP5F,MTMR6,PPM1H,PTPN2,RASA1
Cholesterol Biosynthesis I	2.04	0.231	DHCR7,MSMO1,SC5D
NAD Phosphorylation and Dephosphorylation	2.04	0.231	ACP2,ACP5,NADK
Cholesterol Biosynthesis II (via 24,25-dihydrolanosterol)	2.04	0.231	DHCR7,MSMO1,SC5D
Cholesterol Biosynthesis III (via Desmosterol)	2.04	0.231	DHCR7,MSMO1,SC5D
Xenobiotic Metabolism AHR Signaling Pathway	2.03	0.0941	ALDH1A2,ALDH2,ALDH4A1,CYP1B1,GSTM3,NCOA2,NQO1,TNF
Superpathway of Inositol Phosphate Compounds	2.01	0.0704	ACP5,DUSP1,DUSP10,DUSP12,DUSP16,DUSP2,DUSP5,INPP5D,INPP5F,MTMR6,PIK3CD,PPM1H,PTPN2,RASA1
