# Supplementary material for: C5a Activates a Pro-Inflammatory Gene Expression Profile in Human Gaucher iPSC-Derived Macrophages
Source: Int J Mol Sci. 2021 Sep 14;22(18):9912. doi: 10.3390/ijms22189912 (PMC8466165; doi:10.3390/ijms22189912)
Supplement: Supplementary file 1 [file ijms-22-09912-s001.zip › Supplemental Table S4C.xls]

## Sheet: Sheet0
Ingenuity Canonical Pathways	-log(p-value)	Ratio	Molecules
Neuroinflammation Signaling Pathway	9.49	0.0857	BCL2,CCL2,CCL3,CD200R1,CD40,CXCL10,FOS,HLA-DPA1,HLA-DPB1,HLA-DQA1,HLA-DRA,HLA-DRB1,IKBKE,IL1B,IL6,IRAK2,JUN,MFGE8,NCF1,NOX4,P2RX7,PIK3R3,SLC1A3,TGFBR3,TLR2,TNF,VCAM1
Systemic Lupus Erythematosus In B Cell Signaling Pathway	9.29	0.0903	BCL2,BCL2L1,BCL2L11,CCND1,CD22,CD40,FGR,FOS,FOXO3,FYN,GAB1,IL1B,IL6,INPP5F,IRF5,JUN,LILRB4,MYC,PIK3R3,PIM2,RASGRP1,SRC,TNF,TNFSF4,TRAF1
Hepatic Fibrosis Signaling Pathway	7.42	0.0668	BCL2,CCL2,CCL3,CCND1,CD40,FOS,IKBKE,IL1B,IL1R2,IL1RN,IRAK2,IRS2,ITGAV,ITGB3,JUN,KDR,MAP2K3,MYC,NCF1,NOX4,PDCD4,PIK3R3,PRKACB,RHOBTB1,RND3,TGFBR3,TNF,VCAM1
Granulocyte Adhesion and Diapedesis	7.22	0.0952	CCL1,CCL18,CCL2,CCL24,CCL3,CCL3L3,CCL4L1/CCL4L2,CCL7,CCL8,CCR5,CXCL10,HRH4,IL1B,IL1R2,IL1RN,MMP19,TNF,VCAM1
IL-8 Signaling	7.19	0.09	BCL2,BCL2L1,CCND1,FOS,IKBKE,IRAK2,ITGAV,ITGB3,JUN,KDR,LIMK1,NCF1,NOX4,PIK3R3,RHOBTB1,RND3,SRC,VASP,VCAM1
Role of Macrophages, Fibroblasts and Endothelial Cells in Rheumatoid Arthritis	6.05	0.0677	CCL2,CCND1,CSF1,DKK3,FOS,IKBKE,IL18R1,IL1B,IL1R2,IL1RN,IL6,IRAK2,JUN,MAP2K3,MYC,PIK3R3,ROR2,SRC,TLR2,TNF,TRAF1,VCAM1
IL-10 Signaling	5.74	0.139	CCR5,FOS,IKBKE,IL1B,IL1R2,IL1RN,IL6,JUN,MAP2K3,TNF
Th1 and Th2 Activation Pathway	5.63	0.0872	BHLHE41,CCR5,CD40,HLA-DPA1,HLA-DPB1,HLA-DQA1,HLA-DRA,HLA-DRB1,IL18R1,IL6,JAG1,JUN,PIK3R3,TGFBR3,TNFSF4
Role of Osteoblasts, Osteoclasts and Chondrocytes in Rheumatoid Arthritis	5.47	0.0759	ACP5,BCL2,CSF1,DKK3,FOS,IKBKE,IL18R1,IL1B,IL1R2,IL1RN,IL6,ITGB3,JUN,MAP2K3,PIK3R3,SRC,TNF
Role of Tissue Factor in Cancer	5.38	0.103	BCL2L1,CSF1,EGR1,FGR,FYN,IL1B,ITGAV,ITGB3,LIMK1,PIK3R3,RPS6KA5,SRC
Th2 Pathway	5.36	0.0949	BHLHE41,CCR5,CD40,HLA-DPA1,HLA-DPB1,HLA-DQA1,HLA-DRA,HLA-DRB1,JAG1,JUN,PIK3R3,TGFBR3,TNFSF4
LXR/RXR Activation	5.12	0.0976	ABCA1,ABCG1,APOA2,CCL2,CCL7,IL1B,IL1R2,IL1RN,IL6,LPL,MYLIP,TNF
Agranulocyte Adhesion and Diapedesis	5.1	0.0748	CCL1,CCL18,CCL2,CCL24,CCL3,CCL3L3,CCL4L1/CCL4L2,CCL7,CCL8,CCR5,CXCL10,IL1B,IL1RN,MMP19,TNF,VCAM1
Glucocorticoid Receptor Signaling	5.07	0.0499	BCL2,BCL2L1,BCL2L11,CCL2,CCL3,FOS,FOXO3,HLA-DPA1,HLA-DPB1,HLA-DQA1,HLA-DRA,HLA-DRB1,IKBKE,IL18R1,IL1B,IL1R2,IL1RN,IL6,JUN,MYC,PIK3R3,PRKAB1,PRKACB,RPS6KA5,SRC,TLR2,TNF,TSC22D3,VCAM1
Role of Hypercytokinemia/hyperchemokinemia in the Pathogenesis of Influenza	5.03	0.116	CCL2,CCL3,CXCL10,IL1B,IL1RN,IL6,MX1,OAS2,OAS3,TNF
PD-1, PD-L1 cancer immunotherapy pathway	5	0.104	BCL2L1,HLA-DPA1,HLA-DPB1,HLA-DQA1,HLA-DRA,HLA-DRB1,LCP2,PDCD4,PIK3R3,RASGRP1,TNF
Hepatic Fibrosis / Hepatic Stellate Cell Activation	4.99	0.0773	BCL2,CCL2,CCR5,CD40,COL6A1,COL6A2,CSF1,EDNRB,IGF1R,IL1B,IL1R2,IL6,KDR,TNF,VCAM1
PTEN Signaling	4.93	0.0867	BCL2,BCL2L1,BCL2L11,CCND1,FOXO3,IGF1R,IKBKE,INPP5F,ITGAV,ITGB3,KDR,PIK3R3,TGFBR3
Tumor Microenvironment Pathway	4.75	0.0782	BCL2,CCL2,CCND1,CSF1,FOS,FOXO3,IL1B,IL6,ITGB3,JUN,MMP19,MYC,PIK3R3,TNF
Differential Regulation of Cytokine Production in Macrophages and T Helper Cells by IL-17A and IL-17F	4.64	0.278	CCL2,CCL3,IL1B,IL6,TNF
MSP-RON Signaling In Macrophages Pathway	4.59	0.094	FOS,HLA-DPA1,HLA-DPB1,HLA-DQA1,HLA-DRA,HLA-DRB1,IKBKE,JUN,PIK3R3,ST14,TNF
Toll-like Receptor Signaling	4.56	0.115	FOS,IL1B,IL1RN,IRAK2,JUN,MAP2K3,TLR2,TNF,TRAF1
PI3K/AKT Signaling	4.24	0.0704	BCL2,BCL2L1,CCND1,FOXO3,GAB1,IKBKE,IL18R1,IL1R2,INPP5F,ITGAV,ITGB3,NANOG,PIK3R3,PPP2R2B
Myc Mediated Apoptosis Signaling	4.21	0.14	BCL2,BCL2L1,BCL2L11,IKBKE,MYC,PRKACB,TNF
Atherosclerosis Signaling	4.17	0.0846	APOA2,CCL2,CD40,CSF1,IL1B,IL1RN,IL6,LPL,PLB1,TNF,VCAM1
STAT3 Pathway	4.02	0.0815	BCL2,IGF1R,IL18R1,IL1B,IL1R2,KDR,MAP3K9,MYC,SOCS2,SRC,TGFBR3
Acute Phase Response Signaling	3.98	0.0703	APOA2,F8,FOS,IKBKE,IL1B,IL1RN,IL6,JUN,MAP2K3,OSMR,PIK3R3,SOCS2,TNF
IL-17A Signaling in Fibroblasts	3.98	0.158	CCL2,CCL7,FOS,IKBKE,IL6,JUN
Autophagy	3.93	0.0657	BCL2,FOS,FOXO3,IRS2,JUN,MYC,OPTN,PIK3R3,PPP2R2B,PRKAB1,PRKACB,SESN1,TNF,WIPI1
Antigen Presentation Pathway	3.91	0.154	CD74,HLA-DPA1,HLA-DPB1,HLA-DQA1,HLA-DRA,HLA-DRB1
Hepatic Cholestasis	3.89	0.0688	ATP8B1,CYP27A1,IKBKE,IL1B,IL1R2,IL1RN,IL6,IRAK2,JUN,PRKACB,SLCO3A1,TNF,TNFSF4
Role of MAPK Signaling in Inhibiting the Pathogenesis of Influenza	3.83	0.105	CCL2,CXCL10,IL1B,IL6,JUN,MAP2K3,PLB1,TNF
Cholecystokinin/Gastrin-mediated Signaling	3.81	0.084	CREM,FOS,IL1B,IL1RN,JUN,MAP2K3,RHOBTB1,RND3,SRC,TNF
HMGB1 Signaling	3.81	0.0719	CCL2,FOS,IL1B,IL6,JUN,MAP2K3,PIK3R3,RHOBTB1,RND3,TNF,TNFSF4,VCAM1
TREM1 Signaling	3.79	0.104	CCL2,CCL3,CCL7,CD40,IL1B,IL6,TLR2,TNF
IL-7 Signaling Pathway	3.75	0.103	BCL2,BCL6,CCND1,FOXO3,FYN,JUN,MYC,PIK3R3
Th1 Pathway	3.72	0.082	CCR5,CD40,HLA-DPA1,HLA-DPB1,HLA-DQA1,HLA-DRA,HLA-DRB1,IL18R1,IL6,PIK3R3
IL-15 Production	3.69	0.0813	DYRK3,FGR,FYN,IGF1R,IL6,KDR,MAP2K3,MATK,ROR2,SRC
Chemokine Signaling	3.67	0.1	CCL2,CCL24,CCL7,CCR5,FOS,JUN,LIMK1,SRC
B Cell Development	3.67	0.14	CD40,HLA-DPA1,HLA-DPB1,HLA-DQA1,HLA-DRA,HLA-DRB1
Erythropoietin Signaling Pathway	3.57	0.0678	BCL2L1,CCND1,FOS,FOXO3,IL1B,IL6,IRS2,JUN,PIK3R3,SRC,TNF,TNFSF4
Role of IL-17F in Allergic Inflammatory Airway Diseases	3.56	0.133	CCL2,CCL7,CXCL10,IL1B,IL6,RPS6KA5
IL-6 Signaling	3.55	0.0781	FOS,IKBKE,IL1B,IL1R2,IL1RN,IL6,JUN,MAP2K3,PIK3R3,TNF
CD40 Signaling	3.4	0.104	CD40,FOS,IKBKE,JUN,MAP2K3,PIK3R3,TRAF1
Aryl Hydrocarbon Receptor Signaling	3.39	0.0692	CCND1,CDK6,FOS,IL1B,IL6,JUN,MGST1,MYC,NQO1,SRC,TNF
TNFR2 Signaling	3.37	0.156	FOS,IKBKE,JUN,TNF,TRAF1
Production of Nitric Oxide and Reactive Oxygen Species in Macrophages	3.27	0.0628	APOA2,FOS,IKBKE,JUN,MAP3K9,NCF1,PIK3R3,PPP2R2B,RHOBTB1,RND3,TLR2,TNF
PPARα/RXRα Activation	3.23	0.0622	ABCA1,APOA2,IKBKE,IL1B,IL1R2,IL6,JUN,LPL,MAP2K3,PRKAB1,PRKACB,TGFBR3
B Cell Receptor Signaling	3.21	0.0619	BCL2A1,BCL2L1,BCL6,CD22,EGR1,GAB1,IKBKE,INPP5F,JUN,MAP2K3,MAP3K9,PIK3R3
ERK5 Signaling	3.21	0.0972	FOS,FOSL1,FOXO3,GAB1,MYC,RPS6KA5,SRC
Pathogenesis of Multiple Sclerosis	3.2	0.333	CCL3,CCR5,CXCL10
Fcγ Receptor-mediated Phagocytosis in Macrophages and Monocytes	3.2	0.0851	FGR,FYN,LCP2,NCF1,PIK3R3,SRC,TLN2,VASP
LPS/IL-1 Mediated Inhibition of RXR Function	3.18	0.0556	ABCA1,ABCG1,ACSL5,ALAS1,CHST3,HS3ST3A1,HS3ST3B1,IL1B,IL1R2,IL1RN,JUN,MGST1,PPARGC1B,TNF
p38 MAPK Signaling	3.18	0.0763	IL1B,IL1R2,IL1RN,IRAK2,MAP2K3,MYC,RPS6KA5,TIFA,TNF
HER-2 Signaling in Breast Cancer	3.17	0.0612	BCL2L11,CCND1,FGR,FOS,FOXO3,FYN,IKBKE,ITGB3,JUN,MYC,PIK3R3,SRC
Small Cell Lung Cancer Signaling	3.13	0.0833	BCL2,BCL2L1,CCND1,CDK6,IKBKE,MYC,PIK3R3,TRAF1
ILK Signaling	3.13	0.0606	CCND1,FOS,IRS2,ITGB3,JUN,MYC,PIK3R3,PPP2R2B,RHOBTB1,RND3,RPS6KA5,TNF
Docosahexaenoic Acid (DHA) Signaling	3.02	0.132	BCL2,BCL2A1,BCL2L1,IL1B,PIK3R3
CD27 Signaling in Lymphocytes	3	0.105	BCL2L1,FOS,IKBKE,JUN,MAP2K3,MAP3K9
Osteoarthritis Pathway	3	0.0556	FOXO3,GREM1,HTRA1,IL1B,IL1R2,ITGAV,ITGB3,JAG1,MYBBP1A,P2RX7,PRKAB1,TLR2,TNF
Differential Regulation of Cytokine Production in Intestinal Epithelial Cells by IL-17A and IL-17F	2.97	0.174	CCL2,CCL3,IL1B,TNF
Estrogen-Dependent Breast Cancer Signaling	2.96	0.0886	CCND1,FOS,HSD17B12,IGF1R,JUN,PIK3R3,SRC
HIF1α Signaling	2.95	0.0577	CCNG2,EGLN3,IL6,JUN,KDR,MAP2K3,MMP19,NCF1,NOX4,PIK3R3,SAT1,SLC2A5
Colorectal Cancer Metastasis Signaling	2.91	0.052	BCL2L1,CCND1,FOS,IL6,JUN,MMP19,MYC,PIK3R3,PRKACB,RHOBTB1,RND3,SRC,TLR2,TNF
IGF-1 Signaling	2.91	0.0769	FOS,FOXO3,IGF1R,IRS2,JUN,PIK3R3,PRKACB,SOCS2
Role of Pattern Recognition Receptors in Recognition of Bacteria and Viruses	2.88	0.0641	CLEC6A,IL1B,IL6,OAS2,OAS3,PIK3R3,PTX3,TLR2,TNF,TNFSF4
ERK/MAPK Signaling	2.84	0.0561	DUSP6,FOS,FYN,ITGAV,ITGB3,MYC,PIK3R3,PPP2R2B,PRKACB,RPS6KA5,SRC,TLN2
HGF Signaling	2.83	0.0682	CCND1,FOS,GAB1,IL6,ITGAV,ITGB3,JUN,MAP3K9,PIK3R3
Cardiac Hypertrophy Signaling (Enhanced)	2.82	0.0409	EDNRB,IGF1R,IKBKE,IL18R1,IL1B,IL1R2,IL6,INPP5F,ITGAV,ITGB3,JUN,MAP2K3,MAP3K9,MPPED2,MYC,MYOCD,PIK3R3,PRKACB,RPS6KA5,TGFBR3,TNF,TNFSF4
IL-17A Signaling in Gastric Cells	2.76	0.154	CXCL10,FOS,JUN,TNF
Prolactin Signaling	2.75	0.0814	FOS,FYN,JUN,KCNMB4,MYC,PIK3R3,SOCS2
Regulation Of The Epithelial Mesenchymal Transition By Growth Factors Pathway	2.72	0.0573	EGR1,FOS,GAB1,IKBKE,IL6,JUN,MAP2K3,PIK3R3,TNF,TNFSF18,TNFSF4
Molecular Mechanisms of Cancer	2.72	0.0427	BCL2,BCL2L1,BCL2L11,CCND1,CDK6,FOS,FYN,GAB1,ITGAV,ITGB3,JUN,MAP2K3,MYC,PIK3R3,PRKACB,RASGRP1,RHOBTB1,RND3,SRC
IL-4 Signaling	2.58	0.0761	HLA-DPA1,HLA-DPB1,HLA-DQA1,HLA-DRA,HLA-DRB1,INPP5F,PIK3R3
Senescence Pathway	2.51	0.0471	BHLHE40,CCND1,CDK6,FOXO3,IKBKE,IL6,JUN,MAP2K3,PIK3R3,PPP2R2B,RPS6KA5,TGFBR3,TLR2,YPEL3
Semaphorin Neuronal Repulsive Signaling Pathway	2.44	0.0596	DPYSL3,FYN,ITGAV,ITGB3,LIMK1,MAP2K3,PIK3R3,PRKACB,VCAN
p53 Signaling	2.43	0.0714	BCL2,BCL2L1,CCND1,JMY,JUN,PIK3R3,TP53INP1
Tetrapyrrole Biosynthesis II	2.41	0.4	ALAS1,HMBS
Caveolar-mediated Endocytosis Signaling	2.39	0.08	CD48,DYRK3,FYN,ITGAV,ITGB3,SRC
GDNF Family Ligand-Receptor Interactions	2.36	0.0789	FOS,GAB1,GFRA2,IRS2,JUN,PIK3R3
Neurotrophin/TRK Signaling	2.36	0.0789	FOS,GAB1,JUN,MAP2K3,PIK3R3,SPRY1
4-1BB Signaling in T Lymphocytes	2.33	0.118	IKBKE,JUN,TNFRSF9,TRAF1
Lymphotoxin β Receptor Signaling	2.3	0.0909	BCL2L1,IKBKE,PIK3R3,TRAF1,VCAM1
Apoptosis Signaling	2.28	0.0673	BCL2,BCL2A1,BCL2L1,BCL2L11,IKBKE,LMNA,TNF
IL-9 Signaling	2.28	0.114	IRS2,PIK3R3,SOCS2,TNF
Thyroid Cancer Signaling	2.28	0.0759	CCND1,FOS,IRS2,JUN,MYC,PIK3R3
Sperm Motility	2.24	0.0472	DYRK3,FGR,FYN,IGF1R,KDR,MAP2K3,MATK,PLB1,PRKACB,ROR2,SLC16A10,SRC
Role of MAPK Signaling in the Pathogenesis of Influenza	2.22	0.0741	BCL2,CCL2,CXCL10,MAP2K3,PLB1,TNF
PPAR Signaling	2.22	0.0654	FOS,IKBKE,IL1B,IL1R2,IL1RN,JUN,TNF
MSP-RON Signaling Pathway	2.2	0.0862	CCL2,CSF1,PIK3R3,TLR2,TNF
JAK/Stat Signaling	2.2	0.0732	BCL2L1,FOS,IL6,JUN,PIK3R3,SOCS2
IL-12 Signaling and Production in Macrophages	2.19	0.0588	APOA2,CD40,FOS,IKBKE,JUN,PIK3R3,TLR2,TNF
Inflammasome pathway	2.14	0.15	IL1B,P2RX7,PANX1
Adrenomedullin signaling pathway	2.13	0.0503	BCL2,FOS,IL1B,IL1RN,KCNN4,MAP2K3,MATK,PIK3R3,PRKACB,TNF
PDGF Signaling	2.1	0.0698	FOS,INPP5F,JUN,MYC,PIK3R3,SRC
Apelin Adipocyte Signaling Pathway	2.1	0.0698	CLIC2,MGST1,NCF1,NOX4,PRKAB1,PRKACB
Semaphorin Signaling in Neurons	2.08	0.0806	DPYSL3,FYN,LIMK1,RHOBTB1,RND3
Coronavirus Pathogenesis Pathway	2.07	0.0493	BCL2,BCL2L11,CCL2,CCND1,FOS,IL1B,IL6,JUN,OAS2,OAS3
PI3K Signaling in B Lymphocytes	2.06	0.0559	ATF5,CD40,FOS,FOXO3,FYN,IKBKE,IRS2,JUN
Thrombopoietin Signaling	2.05	0.0794	FOS,IRS2,JUN,MYC,PIK3R3
Regulation of Cellular Mechanics by Calpain Protease	2.03	0.0674	CCND1,CDK6,ITGAV,ITGB3,SRC,TLN2
Neuregulin Signaling	2.01	0.0598	ERRFI1,ITGAV,ITGB3,MATK,MYC,PIK3R3,SRC
Fc Epsilon RI Signaling	2.01	0.0598	FYN,GAB1,INPP5F,LCP2,MAP2K3,PIK3R3,TNF
FAK Signaling	2.01	0.0598	FYN,ITGAV,ITGB3,PIK3R3,SRC,TLN2,TNS1
Ceramide Signaling	2.01	0.0667	BCL2,FOS,JUN,PIK3R3,PPP2R2B,TNF
April Mediated Signaling	2	0.0952	FOS,IKBKE,JUN,TRAF1
PXR/RXR Activation	2	0.0769	ALAS1,FOXO3,IL6,PRKACB,TNF
Activation of IRF by Cytosolic Pattern Recognition Receptors	2	0.0769	CD40,IKBKE,IL6,JUN,TNF
Induction of Apoptosis by HIV1	2	0.0769	BCL2,BCL2L1,IKBKE,TNF,TRAF1
Crosstalk between Dendritic Cells and Natural Killer Cells	1.98	0.0659	CD40,HLA-DRA,HLA-DRB1,IL6,TLN2,TNF
RANK Signaling in Osteoclasts	1.98	0.0659	FOS,IKBKE,JUN,MAP3K9,PIK3R3,SRC
B Cell Activating Factor Signaling	1.96	0.093	FOS,IKBKE,JUN,TRAF1
IL-1 Signaling	1.92	0.0638	FOS,IKBKE,IRAK2,JUN,MAP2K3,PRKACB
Heme Biosynthesis II	1.88	0.222	ALAS1,HMBS
Glutathione Redox Reactions I	1.87	0.12	CLIC2,GSR,MGST1
IL-17 Signaling	1.85	0.0481	CCL2,FOS,IL1B,IL6,JUN,MAP2K3,PIK3R3,TNF,TNFSF4
Reelin Signaling in Neurons	1.85	0.0556	FGR,FYN,LIMK1,MAP2K3,MAP3K9,PIK3R3,SRC
Growth Hormone Signaling	1.84	0.0704	FOS,IGF1R,PIK3R3,RPS6KA5,SOCS2
Salvage Pathways of Pyrimidine Ribonucleotides	1.84	0.0612	CDK6,LIMK1,MAP2K3,MAP3K9,UCK2,UPP1
iNOS Signaling	1.83	0.0851	FOS,IKBKE,IRAK2,JUN
Xenobiotic Metabolism Signaling	1.82	0.0415	CHST3,HS3ST3A1,HS3ST3B1,IL1B,IL6,MAP2K3,MAP3K9,MGST1,NQO1,PIK3R3,PPP2R2B,TNF
VEGF Signaling	1.82	0.0606	BCL2,BCL2L1,FOXO3,KDR,PIK3R3,SRC
Chondroitin Sulfate Biosynthesis (Late Stages)	1.8	0.0833	CHST3,CHSY1,HS3ST3A1,HS3ST3B1
Glioma Invasiveness Signaling	1.79	0.0685	ITGAV,ITGB3,PIK3R3,RHOBTB1,RND3
Sirtuin Signaling Pathway	1.79	0.0411	ABCA1,BCL2L11,DOT1L,DUSP6,FOXO3,JUN,MYC,NQO1,PPIF,TNF,TOMM34,TOMM40
FAT10 Cancer Signaling Pathway	1.74	0.08	IKBKE,IL6,TGFBR3,TNF
Natural Killer Cell Signaling	1.69	0.0452	CD48,FYN,IL18R1,LCP2,LIMK1,MAP2K3,MAP3K9,PIK3R3,PVR
Role of PKR in Interferon Induction and Antiviral Response	1.68	0.0515	COLEC12,FOS,IKBKE,IL1B,JUN,MAP2K3,TNF
NF-κB Activation by Viruses	1.68	0.0641	CCR5,IKBKE,ITGAV,ITGB3,PIK3R3
TNFR1 Signaling	1.68	0.0769	FOS,IKBKE,JUN,TNF
UVB-Induced MAPK Signaling	1.68	0.0769	FOS,JUN,PIK3R3,RPS6KA5
Signaling by Rho Family GTPases	1.68	0.041	FOS,ITGAV,ITGB3,JUN,LIMK1,MAP3K9,NCF1,NOX4,PIK3R3,RHOBTB1,RND3
Chronic Myeloid Leukemia Signaling	1.67	0.0561	BCL2L1,CCND1,CDK6,IKBKE,MYC,PIK3R3
Rac Signaling	1.65	0.0507	ITGAV,ITGB3,JUN,LIMK1,NCF1,NOX4,PIK3R3
MSP-RON Signaling In Cancer Cells Pathway	1.65	0.0507	CCND1,FOS,JUN,MYC,PIK3R3,SRC,ST14
3-phosphoinositide Biosynthesis	1.64	0.0443	ACP5,DOT1L,DUSP6,INPP5F,IPMK,PGAM5,PIK3R3,PPP2R2B,TNS3
NRF2-mediated Oxidative Stress Response	1.64	0.0422	DNAJB4,ENC1,FOS,FOSL1,GSR,JUN,MAP2K3,MGST1,NQO1,PIK3R3
Renal Cell Carcinoma Signaling	1.64	0.0625	EGLN3,FOS,GAB1,JUN,PIK3R3
Germ Cell-Sertoli Cell Junction Signaling	1.63	0.0468	LIMK1,MAP2K3,MAP3K9,PIK3R3,RHOBTB1,RND3,SRC,TNF
Glioblastoma Multiforme Signaling	1.63	0.0468	CCND1,CDK6,IGF1R,MYC,PIK3R3,RHOBTB1,RND3,SRC
Role of Cytokines in Mediating Communication between Immune Cells	1.63	0.0741	IL1B,IL1RN,IL6,TNF
Insulin Receptor Signaling	1.62	0.05	FOXO3,FYN,GAB1,INPP5F,IRS2,PIK3R3,PRKACB
Sertoli Cell-Sertoli Cell Junction Signaling	1.61	0.0437	ITGAV,ITGB3,JUN,MAP2K3,MAP3K9,PRKACB,SRC,TGFBR3,TNF
EGF Signaling	1.6	0.0727	FOS,JUN,PIK3R3,SRC
Endocannabinoid Cancer Inhibition Pathway	1.58	0.049	CCND1,MAP2K3,MYC,PIK3R3,PRKAB1,PRKACB,SRC
Chondroitin Sulfate Biosynthesis	1.58	0.0714	CHST3,CHSY1,HS3ST3A1,HS3ST3B1
Bile Acid Biosynthesis, Neutral Pathway	1.56	0.154	AMACR,CYP27A1
D-myo-inositol (1,4,5,6)-Tetrakisphosphate Biosynthesis	1.56	0.0452	ACP5,DOT1L,DUSP6,INPP5F,IPMK,PGAM5,PPP2R2B,TNS3
D-myo-inositol (3,4,5,6)-tetrakisphosphate Biosynthesis	1.56	0.0452	ACP5,DOT1L,DUSP6,INPP5F,IPMK,PGAM5,PPP2R2B,TNS3
Role of IL-17A in Arthritis	1.55	0.0702	CCL2,CCL7,MAP2K3,PIK3R3
LPS-stimulated MAPK Signaling	1.54	0.0588	FOS,IKBKE,JUN,MAP2K3,PIK3R3
Integrin Signaling	1.53	0.0423	FYN,ITGAV,ITGB3,PIK3R3,RHOBTB1,RND3,SRC,TLN2,VASP
Inhibition of Angiogenesis by TSP1	1.51	0.0882	FYN,JUN,KDR
Dermatan Sulfate Biosynthesis	1.5	0.0678	CHST3,CHSY1,HS3ST3A1,HS3ST3B1
Xenobiotic Metabolism AHR Signaling Pathway	1.5	0.0575	IL1B,IL6,MGST1,NQO1,TNF
Phagosome Formation	1.49	0.047	FCAR,ITGAV,ITGB3,PIK3R3,RHOBTB1,RND3,TLR2
Endometrial Cancer Signaling	1.48	0.0667	CCND1,FOXO3,MYC,PIK3R3
Renin-Angiotensin Signaling	1.45	0.05	CCL2,FOS,JUN,PIK3R3,PRKACB,TNF
Type II Diabetes Mellitus Signaling	1.45	0.0461	ACSL5,IKBKE,IRS2,PIK3R3,PRKAB1,SOCS2,TNF
Estrogen Receptor Signaling	1.44	0.0347	BCL2,CCND1,FBXO32,FOS,FOXO3,IGF1R,JUN,LIMK1,MMP19,MYC,PIK3R3,PRKAB1,PRKACB,SRC
Acute Myeloid Leukemia Signaling	1.43	0.0549	CCND1,MAP2K3,MYC,PIK3R3,PIM2
Cell Cycle Regulation by BTG Family Proteins	1.42	0.0811	BTG2,CCND1,PPP2R2B
Endocannabinoid Developing Neuron Pathway	1.41	0.0488	CCND1,MAP2K3,MGLL,PIK3R3,PRKACB,SRC
All-trans-decaprenyl Diphosphate Biosynthesis	1.4	0.5	PDSS1
Xanthine and Xanthosine Salvage	1.4	0.5	PNP
Actin Nucleation by ARP-WASP Complex	1.39	0.0538	ITGAV,ITGB3,RHOBTB1,RND3,VASP
Endothelin-1 Signaling	1.39	0.0419	EDNRB,FOS,GAB1,JUN,MYC,PIK3R3,PLB1,SRC
Melanocyte Development and Pigmentation Signaling	1.38	0.0532	BCL2,PIK3R3,PRKACB,RPS6KA5,SRC
ErbB2-ErbB3 Signaling	1.37	0.0615	CCND1,JUN,MYC,PIK3R3
FXR/RXR Activation	1.37	0.0476	APOA2,CYP27A1,IL1B,IL1RN,LPL,TNF
Ferroptosis Signaling Pathway	1.37	0.0476	ABCA1,EMP1,NOX4,PRKAB1,SAT1,STEAP3
GP6 Signaling Pathway	1.35	0.0472	COL6A1,COL6A2,FYN,ITGB3,LCP2,PIK3R3
Pyridoxal 5'-phosphate Salvage Pathway	1.35	0.0606	CDK6,LIMK1,MAP2K3,MAP3K9
Death Receptor Signaling	1.34	0.0521	BCL2,IKBKE,LIMK1,LMNA,TNF
P2Y Purigenic Receptor Signaling Pathway	1.33	0.0465	FOS,ITGB3,JUN,MYC,PIK3R3,PRKACB
Superpathway of Inositol Phosphate Compounds	1.32	0.0386	ACP5,DOT1L,DUSP6,INPP5F,IPMK,PGAM5,PIK3R3,PPP2R2B,TNS3
UVA-Induced MAPK Signaling	1.31	0.051	BCL2L1,FOS,JUN,PIK3R3,RPS6KA5
1D-myo-inositol Hexakisphosphate Biosynthesis II (Mammalian)	1.3	0.111	INPP5F,IPMK
D-myo-inositol (1,3,4)-trisphosphate Biosynthesis	1.3	0.111	INPP5F,IPMK
GM-CSF Signaling	1.27	0.0571	BCL2A1,BCL2L1,CCND1,PIK3R3
CXCR4 Signaling	1.27	0.0419	EGR1,FOS,JUN,PIK3R3,RHOBTB1,RND3,SRC
Neuropathic Pain Signaling In Dorsal Horn Neurons	1.27	0.0495	FOS,KCNN4,PIK3R3,PRKACB,SRC
G-Protein Coupled Receptor Signaling	1.26	0.0362	DUSP6,FYN,IKBKE,MPPED2,P2RY13,PIK3R3,PRKACB,RASGRP1,RGS2,SRC
MIF Regulation of Innate Immunity	1.23	0.0682	CD74,FOS,JUN
Retinol Biosynthesis	1.23	0.0682	DHRS3,LPL,PLB1
Guanine and Guanosine Salvage I	1.23	0.333	PNP
Adenine and Adenosine Salvage I	1.23	0.333	PNP
1D-myo-inositol Hexakisphosphate Biosynthesis V (from Ins(1,3,4)P3)	1.23	0.333	IPMK
Heparan Sulfate Biosynthesis (Late Stages)	1.22	0.0548	CHST3,EXTL2,HS3ST3A1,HS3ST3B1
Wnt/β-catenin Signaling	1.21	0.0405	CCND1,DKK3,JUN,MYC,PPP2R2B,SRC,TGFBR3
Apelin Endothelial Signaling Pathway	1.2	0.0432	CCL2,FOS,JUN,PIK3R3,PRKAB1,VCAM1
Dermatan Sulfate Biosynthesis (Late Stages)	1.18	0.0652	CHST3,HS3ST3A1,HS3ST3B1
Apelin Pancreas Signaling Pathway	1.18	0.0652	PIK3R3,PRKAB1,PRKACB
PFKFB4 Signaling Pathway	1.18	0.0652	MAP2K3,PRKACB,RPS6KA5
IL-23 Signaling Pathway	1.18	0.0652	IL1B,PIK3R3,TNF
Macropinocytosis Signaling	1.17	0.0526	CSF1,ITGB3,PIK3R3,SRC
Paxillin Signaling	1.17	0.0463	ITGAV,ITGB3,PIK3R3,SRC,TLN2
Ephrin A Signaling	1.16	0.0638	FYN,LIMK1,PIK3R3
Superpathway of D-myo-inositol (1,4,5)-trisphosphate Metabolism	1.11	0.087	INPP5F,IPMK
Apelin Cardiac Fibroblast Signaling Pathway	1.11	0.087	IL6,PRKAB1
Spermine and Spermidine Degradation I	1.11	0.25	SAT1
Glutathione Redox Reactions II	1.11	0.25	GSR
Heparan Sulfate Biosynthesis	1.1	0.05	CHST3,EXTL2,HS3ST3A1,HS3ST3B1
Cardiac Hypertrophy Signaling	1.1	0.0349	IGF1R,IL6,JUN,MAP2K3,MAP3K9,PIK3R3,PRKACB,RHOBTB1,RND3
BEX2 Signaling Pathway	1.09	0.0494	BCL2,CCND1,JUN,PPP2R2B
Triacylglycerol Degradation	1.08	0.0588	LPL,MGLL,PLB1
UVC-Induced MAPK Signaling	1.08	0.0588	FOS,JUN,SRC
Regulation of Actin-based Motility by Rho	1.06	0.0431	ITGAV,ITGB3,LIMK1,RHOBTB1,RND3
GNRH Signaling	1.06	0.0372	EGR1,FOS,JUN,MAP2K3,MAP3K9,PRKACB,SRC
3-phosphoinositide Degradation	1.05	0.037	ACP5,DOT1L,DUSP6,INPP5F,PGAM5,PPP2R2B,TNS3
Xenobiotic Metabolism CAR Signaling Pathway	1.05	0.037	CHST3,HS3ST3A1,HS3ST3B1,MAP2K3,MGST1,PPP2R2B,SRC
Role of JAK family kinases in IL-6-type Cytokine Signaling	1.05	0.08	IL6,OSMR
PEDF Signaling	1.04	0.0476	BCL2,BCL2L1,IKBKE,PIK3R3
FGF Signaling	1.04	0.0476	GAB1,MAP2K3,PIK3R3,RPS6KA5
Airway Pathology in Chronic Obstructive Pulmonary Disease	1.04	0.0424	CCL2,IL1B,IL6,TNF,TNFSF4
PAK Signaling	1.04	0.0424	ITGAV,ITGB3,LIMK1,PIK3R3,TNF
NGF Signaling	1.04	0.0424	GAB1,IKBKE,MAP3K9,PIK3R3,RPS6KA5
Estrogen-mediated S-phase Entry	1.02	0.0769	CCND1,MYC
Arsenate Detoxification I (Glutaredoxin)	1.01	0.2	PNP
Protein Citrullination	1.01	0.2	PADI2
Myo-inositol Biosynthesis	1.01	0.2	INPP5F
Leukocyte Extravasation Signaling	1.01	0.0363	MMP19,NCF1,PIK3R3,RASGRP1,SRC,VASP,VCAM1
D-myo-inositol-5-phosphate Metabolism	1.01	0.0363	ACP5,DOT1L,DUSP6,INPP5F,PGAM5,PPP2R2B,TNS3
Necroptosis Signaling Pathway	1	0.0382	PGAM5,PPIF,TNF,TNIP1,TOMM34,TOMM40
RAR Activation	0.987	0.0357	DHRS3,FOS,JUN,PIK3R3,PRKACB,SRC,TNIP1
NAD Salvage Pathway II	0.987	0.0741	ACP5,NMRK1
Synaptogenesis Signaling Pathway	0.987	0.0321	CHN1,FGR,FYN,LIMK1,PIK3R3,PRKACB,RASGRP1,SRC,STXBP6,SYT1
14-3-3-mediated Signaling	0.939	0.0394	FOS,JUN,PIK3R3,SRC,TNF
Chondroitin and Dermatan Biosynthesis	0.939	0.167	CHSY1
Ceramide Biosynthesis	0.939	0.167	SPTLC3
Tryptophan Degradation to 2-amino-3-carboxymuconate Semialdehyde	0.939	0.167	KMO
Zymosterol Biosynthesis	0.939	0.167	MSMO1
GDP-mannose Biosynthesis	0.939	0.167	PMM2
AMPK Signaling	0.924	0.0331	CCND1,FOXO3,IRS2,MAP2K3,PIK3R3,PPP2R2B,PRKAB1,PRKACB
Non-Small Cell Lung Cancer Signaling	0.91	0.0426	CCND1,CDK6,FOXO3,PIK3R3
ErbB Signaling	0.91	0.0426	FOS,JUN,MAP2K3,PIK3R3
Gustation Pathway	0.91	0.0359	MPPED2,P2RX7,P2RY13,P2RY8,PANX1,PRKACB
IL-2 Signaling	0.9	0.0492	FOS,JUN,PIK3R3
TGF-β Signaling	0.886	0.0417	BCL2,FOS,JUN,MAP2K3
NAD Salvage Pathway III	0.876	0.143	NMRK1
Adenine and Adenosine Salvage III	0.876	0.143	PNP
Airway Inflammation in Asthma	0.866	0.0625	CCL2,RNASE3
Adipogenesis pathway	0.857	0.037	EGR2,LPL,NR1D2,TNF,TXNIP
Circadian Rhythm Signaling	0.845	0.0606	BHLHE40,BHLHE41
Breast Cancer Regulation by Stathmin1	0.83	0.027	ADGRL4,CCND1,CCR5,CDK6,EDNRB,FFAR2,GPR141,GPR155,GPR35,GPR84,HRH4,JUN,P2RY13,PIK3R3,PPP2R2B,PRKACB
T Cell Receptor Signaling	0.83	0.027	DUSP6,FOS,FOXO3,FYN,HLA-DPA1,HLA-DPB1,HLA-DQA1,HLA-DRA,HLA-DRB1,IKBKE,JUN,LCP2,MAP2K3,PIK3R3,RASGRP1,TNF
Role of JAK2 in Hormone-like Cytokine Signaling	0.824	0.0588	IRS2,SOCS2
Inositol Pyrophosphates Biosynthesis	0.821	0.125	IPMK
Superoxide Radicals Degradation	0.821	0.125	NQO1
Purine Ribonucleosides Degradation to Ribose-1-phosphate	0.821	0.125	PNP
Tight Junction Signaling	0.815	0.0337	FOS,JUN,PPP2R2B,PRKACB,TNF,VASP
IL-17A Signaling in Airway Cells	0.812	0.0448	IKBKE,IL6,PIK3R3
Sumoylation Pathway	0.807	0.0388	FOS,JUN,RHOBTB1,RND3
Cell Cycle: G1/S Checkpoint Regulation	0.801	0.0441	CCND1,CDK6,MYC
Virus Entry via Endocytic Pathways	0.799	0.0385	FYN,ITGB3,PIK3R3,SRC
Role of NFAT in Cardiac Hypertrophy	0.799	0.0318	IGF1R,IL6,MAP2K3,PIK3R3,PRKACB,RCAN2,SRC
Interferon Signaling	0.785	0.0556	BCL2,MX1
Xenobiotic Metabolism General Signaling Pathway	0.785	0.035	MAP2K3,MAP3K9,MGST1,NQO1,PIK3R3
Sucrose Degradation V (Mammalian)	0.775	0.111	ALDOC
Salvage Pathways of Pyrimidine Deoxyribonucleotides	0.775	0.111	UPP1
EIF2 Signaling	0.772	0.0312	ATF5,BCL2,CCND1,IGF1R,MYC,NOX4,PIK3R3
TWEAK Signaling	0.767	0.0541	IKBKE,TRAF1
Telomerase Signaling	0.767	0.0374	DKC1,MYC,PIK3R3,PPP2R2B
cAMP-mediated signaling	0.738	0.0306	CREM,DUSP6,MPPED2,P2RY13,PRKACB,RGS2,SRC
Embryonic Stem Cell Differentiation into Cardiac Lineages	0.733	0.1	NANOG
Factors Promoting Cardiogenesis in Vertebrates	0.719	0.0331	CCND1,MYC,MYOCD,NOX4,TGFBR3
CDK5 Signaling	0.719	0.0357	CABLES1,EGR1,PPP2R2B,PRKACB
Antioxidant Action of Vitamin C	0.719	0.0357	IKBKE,PLB1,SLC2A5,TNF
Role of MAPK Signaling in Promoting the Pathogenesis of Influenza	0.719	0.0357	BCL2,JUN,MAP2K3,PLB1
Opioid Signaling Pathway	0.706	0.029	FGR,FOS,FYN,MAP2K3,MYC,PRKACB,RPS6KA5,SRC
Relaxin Signaling	0.703	0.0327	FOS,JUN,MPPED2,PIK3R3,PRKACB
IL-15 Signaling	0.69	0.039	BCL2L1,MYC,PIK3R3
Angiopoietin Signaling	0.69	0.039	IKBKE,PIK3R3,TNIP1
Bladder Cancer Signaling	0.682	0.0345	CCND1,MMP19,MYC,RPS6KA5
IL-3 Signaling	0.67	0.038	FOS,JUN,PIK3R3
Ovarian Cancer Signaling	0.666	0.0316	BCL2,CCND1,PIK3R3,PRKACB,SRC
Hematopoiesis from Multipotent Stem Cells	0.664	0.0833	CSF1
NAD biosynthesis II (from tryptophan)	0.664	0.0833	KMO
Phagosome Maturation	0.658	0.0314	HLA-DRA,HLA-DRB1,NCF1,NOX4,VPS37C
tRNA Splicing	0.652	0.0455	MPPED2,TSEN2
Axonal Guidance Signaling	0.646	0.0257	ADAMTS12,ADAMTS15,ADAMTS6,ADAMTS9,FYN,ITGAV,ITGB3,LIMK1,PIK3R3,PRKACB,ROBO2,SEMA3D,VASP
Inhibition of ARE-Mediated mRNA Degradation Pathway	0.644	0.0311	PPP2R2B,PRKACB,TNF,TNFSF18,TNFSF4
Cholesterol Biosynthesis I	0.633	0.0769	MSMO1
NAD Phosphorylation and Dephosphorylation	0.633	0.0769	ACP5
Cholesterol Biosynthesis II (via 24,25-dihydrolanosterol)	0.633	0.0769	MSMO1
Guanosine Nucleotides Degradation III	0.633	0.0769	PNP
Cholesterol Biosynthesis III (via Desmosterol)	0.633	0.0769	MSMO1
CREB Signaling in Neurons	0.622	0.0249	ADGRL4,CCR5,EDNRB,FFAR2,GPR141,GPR155,GPR35,GPR84,HRH4,IGF1R,KDR,P2RY13,PIK3R3,PRKACB,TGFBR3
Cyclins and Cell Cycle Regulation	0.618	0.0357	CCND1,CDK6,PPP2R2B
VEGF Family Ligand-Receptor Interactions	0.618	0.0357	FOS,KDR,PIK3R3
Glioma Signaling	0.616	0.0323	CCND1,CDK6,IGF1R,PIK3R3
Altered T Cell and B Cell Signaling in Rheumatoid Arthritis	0.613	0.0255	CD40,CSF1,HLA-DPA1,HLA-DPB1,HLA-DQA1,HLA-DRA,HLA-DRB1,IL1B,IL1RN,IL6,TLR2,TNF
Fatty Acid Activation	0.604	0.0714	ACSL5
Urate Biosynthesis/Inosine 5'-phosphate Degradation	0.604	0.0714	PNP
Colanic Acid Building Blocks Biosynthesis	0.604	0.0714	PMM2
Pancreatic Adenocarcinoma Signaling	0.6	0.0317	BCL2,BCL2L1,CCND1,PIK3R3
BMP signaling pathway	0.59	0.0345	GREM1,JUN,PRKACB
mTOR Signaling	0.587	0.0283	PIK3R3,PPP2R2B,PRKAB1,RHOBTB1,RND3,RPS6KA5
Gαq Signaling	0.583	0.0294	IKBKE,PIK3R3,RGS2,RHOBTB1,RND3
Melanoma Signaling	0.572	0.04	CCND1,PIK3R3
Systemic Lupus Erythematosus In T Cell Signaling Pathway	0.572	0.0243	BCL6,CREM,FOS,HLA-DPA1,HLA-DPB1,HLA-DQA1,HLA-DRA,HLA-DRB1,IL6,JUN,MAP2K3,PIK3R3,PPP2R2B,RHOBTB1,RND3
RhoGDI Signaling	0.57	0.0279	ITGAV,ITGB3,LIMK1,RHOBTB1,RND3,SRC
Adenosine Nucleotides Degradation II	0.554	0.0625	PNP
Type I Diabetes Mellitus Signaling	0.55	0.0246	BCL2,HLA-DPA1,HLA-DPB1,HLA-DQA1,HLA-DRA,HLA-DRB1,ICA1,IKBKE,IL1B,MAP2K3,SOCS2,TNF
Gα12/13 Signaling	0.55	0.0301	IKBKE,JUN,PIK3R3,SRC
D-myo-inositol (1,4,5)-trisphosphate Degradation	0.533	0.0588	INPP5F
Histamine Degradation	0.533	0.0588	AOC1
Insulin Secretion Signaling Pathway	0.524	0.0261	FGR,FYN,PIK3R3,PRKACB,RPS6KA5,SLC2A5,SRC
γ-linolenate Biosynthesis II (Animals)	0.511	0.0556	ACSL5
Mitochondrial L-carnitine Shuttle Pathway	0.511	0.0556	ACSL5
Pregnenolone Biosynthesis	0.511	0.0556	CYP27A1
T Cell Exhaustion Signaling Pathway	0.511	0.0239	BCL6,FOS,HLA-DPA1,HLA-DPB1,HLA-DQA1,HLA-DRA,HLA-DRB1,IL6,JUN,KDR,PIK3R3,PPP2R2B,TGFBR3
Iron homeostasis signaling pathway	0.51	0.0288	CYBRD1,IL6,SLC40A1,STEAP3
CNTF Signaling	0.495	0.0351	PIK3R3,RPS6KA5
Purine Nucleotides Degradation II (Aerobic)	0.492	0.0526	PNP
Hereditary Breast Cancer Signaling	0.491	0.0282	CCND1,CDK6,FAAP100,PIK3R3
Cancer Drug Resistance By Drug Efflux	0.484	0.0345	FOXO3,PIK3R3
GADD45 Signaling	0.475	0.05	CCND1
The Visual Cycle	0.475	0.05	DHRS3
Dilated Cardiomyopathy Signaling Pathway	0.467	0.0274	BCL2,GAB1,LMNA,PRKACB
PCP pathway	0.465	0.0333	JUN,ROR2
Xenobiotic Metabolism PXR Signaling Pathway	0.46	0.026	CHST3,HS3ST3A1,HS3ST3B1,MGST1,PRKACB
Putrescine Degradation III	0.457	0.0476	SAT1
Mouse Embryonic Stem Cell Pluripotency	0.455	0.0288	MYC,NANOG,PIK3R3
Polyamine Regulation in Colon Cancer	0.447	0.0323	MYC,SAT1
Regulation of the Epithelial-Mesenchymal Transition Pathway	0.445	0.0256	EGR1,GAB1,JAG1,MAP2K3,PIK3R3
Dendritic Cell Maturation	0.444	0.0229	CD40,HLA-DPA1,HLA-DPB1,HLA-DQA1,HLA-DRA,HLA-DRB1,IKBKE,IL1B,IL1RN,IL6,PIK3R3,TLR2,TNF
Communication between Innate and Adaptive Immune Cells	0.444	0.0233	CCL3,CCL3L3,CD40,CXCL10,HLA-DRA,HLA-DRB1,IL1B,IL1RN,IL6,TLR2,TNF
CDP-diacylglycerol Biosynthesis I	0.441	0.0455	GPAT3
Actin Cytoskeleton Signaling	0.426	0.0245	ITGAV,ITGB3,LIMK1,MATK,PIK3R3,TLN2
Ephrin Receptor Signaling	0.417	0.0249	FYN,ITGAV,ITGB3,LIMK1,SRC
Mitotic Roles of Polo-Like Kinase	0.413	0.0303	PLK2,PPP2R2B
Role of PI3K/AKT Signaling in the Pathogenesis of Influenza	0.413	0.0303	CCR5,PIK3R3
Phospholipases	0.413	0.0303	LPL,PLB1
Phosphatidylglycerol Biosynthesis II (Non-plastidic)	0.412	0.0417	GPAT3
Tryptophan Degradation III (Eukaryotic)	0.412	0.0417	KMO
Prostate Cancer Signaling	0.403	0.0268	BCL2,CCND1,PIK3R3
PKCθ Signaling in T Lymphocytes	0.398	0.0224	FOS,FYN,HLA-DPA1,HLA-DPB1,HLA-DQA1,HLA-DRA,HLA-DRB1,IKBKE,JUN,LCP2,MAP3K9,PIK3R3
eNOS Signaling	0.397	0.0252	KDR,PIK3R3,PRKAB1,PRKACB
Role of JAK1 and JAK3 in γc Cytokine Signaling	0.389	0.029	IRS2,PIK3R3
SPINK1 General Cancer Pathway	0.389	0.029	IL6,PIK3R3
Amyotrophic Lateral Sclerosis Signaling	0.386	0.0261	BCL2,BCL2L1,PIK3R3
Glycolysis I	0.385	0.0385	ALDOC
Gluconeogenesis I	0.385	0.0385	ALDOC
Apelin Liver Signaling Pathway	0.385	0.0385	TNF
Agrin Interactions at Neuromuscular Junction	0.382	0.0286	JUN,SRC
CD28 Signaling in T Helper Cells	0.38	0.0222	FOS,FYN,HLA-DPA1,HLA-DPB1,HLA-DQA1,HLA-DRA,HLA-DRB1,IKBKE,JUN,LCP2,PIK3R3
T Helper Cell Differentiation	0.375	0.0223	BCL6,CD40,HLA-DPA1,HLA-DPB1,HLA-DQA1,HLA-DRA,HLA-DRB1,IL18R1,IL6,TNF
Sphingosine-1-phosphate Signaling	0.37	0.0254	PIK3R3,RHOBTB1,RND3
Neuroprotective Role of THOP1 in Alzheimer's Disease	0.37	0.0254	HTRA1,PRKACB,ST14
Melatonin Signaling	0.368	0.0278	MAP2K3,PRKACB
NF-κB Signaling	0.368	0.0219	CD40,IGF1R,IL1B,IL1R2,IL1RN,KDR,PIK3R3,PRKACB,TGFBR3,TLR2,TNF,TNIP1
Nitric Oxide Signaling in the Cardiovascular System	0.364	0.0252	KDR,PIK3R3,PRKACB
Role of NANOG in Mammalian Embryonic Stem Cell Pluripotency	0.359	0.025	GAB1,NANOG,PIK3R3
Leptin Signaling in Obesity	0.355	0.027	PIK3R3,PRKACB
Hypoxia Signaling in the Cardiovascular System	0.355	0.027	JUN,NQO1
Gαs Signaling	0.354	0.0248	PRKACB,RGS2,SRC
Androgen Signaling	0.351	0.0237	CCND1,JUN,PRKACB,SRC
Superpathway of Cholesterol Biosynthesis	0.35	0.0345	MSMO1
Role of p14/p19ARF in Tumor Suppression	0.35	0.0345	PIK3R3
Sonic Hedgehog Signaling	0.35	0.0345	PRKACB
RhoA Signaling	0.338	0.0242	IGF1R,LIMK1,RND3
Antiproliferative Role of Somatostatin Receptor 2	0.334	0.026	PIK3R3,SRC
Dopamine Receptor Signaling	0.334	0.026	PPP2R2B,PRKACB
Role of NFAT in Regulation of the Immune Response	0.322	0.0212	FOS,FYN,HLA-DPA1,HLA-DPB1,HLA-DQA1,HLA-DRA,HLA-DRB1,IKBKE,JUN,LCP2,PIK3R3,RCAN2
FLT3 Signaling in Hematopoietic Progenitor Cells	0.316	0.025	PIK3R3,RPS6KA5
Graft-versus-Host Disease Signaling	0.312	0.0212	HLA-DPA1,HLA-DPB1,HLA-DQA1,HLA-DRA,HLA-DRB1,IL1B,IL1RN,IL6,TNF
Regulation of eIF4 and p70S6K Signaling	0.31	0.0223	ITGAV,ITGB3,PIK3R3,PPP2R2B
Glutathione-mediated Detoxification	0.31	0.0303	MGST1
fMLP Signaling in Neutrophils	0.305	0.0229	NCF1,NOX4,PIK3R3
p70S6K Signaling	0.301	0.0227	PIK3R3,PPP2R2B,SRC
Fatty Acid β-oxidation I	0.3	0.0294	ACSL5
TR/RXR Activation	0.294	0.0238	PIK3R3,RCAN2
Coagulation System	0.292	0.0286	F8
CCR3 Signaling in Eosinophils	0.288	0.0222	CCL24,LIMK1,PIK3R3
White Adipose Tissue Browning Pathway	0.284	0.0221	KDR,PRKAB1,PRKACB
MIF-mediated Glucocorticoid Regulation	0.283	0.0278	CD74
Retinoate Biosynthesis I	0.283	0.0278	DHRS3
Gαi Signaling	0.276	0.0217	P2RY13,PRKACB,SRC
Notch Signaling	0.268	0.0263	JAG1
Unfolded protein response	0.264	0.0222	BCL2,DNAJB4
Clathrin-mediated Endocytosis Signaling	0.26	0.0207	APOA2,ITGB3,PIK3R3,SRC
Inhibition of Matrix Metalloproteases	0.26	0.0256	MMP19
Mechanisms of Viral Exit from Host Cells	0.246	0.0244	VPS37C
Endocannabinoid Neuronal Synapse Pathway	0.242	0.0204	DAGLA,MGLL,PRKACB
Intrinsic Prothrombin Activation Pathway	0.24	0.0238	F8
Oncostatin M Signaling	0.233	0.0233	OSMR
ATM Signaling	0.232	0.0206	JUN,PPP2R2B
Estrogen Biosynthesis	0.227	0.0227	HSD17B12
Role of RIG1-like Receptors in Antiviral Innate Immunity	0.215	0.0217	IKBKE
Role of Oct4 in Mammalian Embryonic Stem Cell Pluripotency	0.215	0.0217	NANOG
Triacylglycerol Biosynthesis	0.21	0.0213	GPAT3
Apelin Muscle Signaling Pathway	0.204	0.0208	PRKAB1
NAD Signaling Pathway	0	0.0199	NMRK1,PIK3R3,PRKAB1
Synaptic Long Term Potentiation	0	0.00775	PRKACB
Synaptic Long Term Depression	0	0.0155	IGF1R,PLB1,PPP2R2B
Huntington's Disease Signaling	0	0.0142	BCL2L1,IGF1R,JUN,PIK3R3
Mitochondrial Dysfunction	0	0.0118	BCL2,GSR
VDR/RXR Activation	0	0.0128	CXCL10
Role of BRCA1 in DNA Damage Response	0	0.0125	FAAP100
α-Adrenergic Signaling	0	0.00943	PRKACB
FcγRIIB Signaling in B Lymphocytes	0	0.0118	PIK3R3
CCR5 Signaling in Macrophages	0	0.00839	CCL3,CCR5,FOS,JUN
Calcium-induced T Lymphocyte Apoptosis	0	0.0114	HLA-DPA1,HLA-DPB1,HLA-DQA1,HLA-DRA,HLA-DRB1
Cytotoxic T Lymphocyte-mediated Apoptosis of Target Cells	0	0.00248	BCL2
CTLA4 Signaling in Cytotoxic T Lymphocytes	0	0.00877	FYN,LCP2,PIK3R3,PPP2R2B
Cellular Effects of Sildenafil (Viagra)	0	0.0134	KCNN4,PRKACB
Thrombin Signaling	0	0.019	PIK3R3,RHOBTB1,RND3,SRC
iCOS-iCOSL Signaling in T Helper Cells	0	0.0186	CD40,HLA-DPA1,HLA-DPB1,HLA-DQA1,HLA-DRA,HLA-DRB1,IKBKE,LCP2,PIK3R3
Corticotropin Releasing Hormone Signaling	0	0.0201	FOS,JUN,PRKACB
Maturity Onset Diabetes of Young (MODY) Signaling	0	0.0128	APOA2
Role of CHK Proteins in Cell Cycle Checkpoint Control	0	0.0175	PPP2R2B
Human Embryonic Stem Cell Pluripotency	0	0.012	NANOG,PIK3R3
Aldosterone Signaling in Epithelial Cells	0	0.0183	DNAJB4,KCNMB4,PIK3R3
Primary Immunodeficiency Signaling	0	0.0185	CD40
Allograft Rejection Signaling	0	0.0152	CD40,HLA-DPA1,HLA-DPB1,HLA-DQA1,HLA-DRA,HLA-DRB1,TNF
Autoimmune Thyroid Disease Signaling	0	0.0139	CD40,HLA-DPA1,HLA-DPB1,HLA-DQA1,HLA-DRA,HLA-DRB1
G Beta Gamma Signaling	0	0.0155	PRKACB,SRC
Systemic Lupus Erythematosus Signaling	0	0.0184	CD22,CD40,CREM,FOS,IL1B,IL1RN,IL6,JUN,PIK3R3,PIM2,TNF
Cdc42 Signaling	0	0.0199	FOS,HLA-DPA1,HLA-DPB1,HLA-DQA1,HLA-DRA,HLA-DRB1,ITGAV,ITGB3,JUN,LIMK1,SRC
Phospholipase C Signaling	0	0.0107	FYN,ITGAV,ITGB3,LCP2,RHOBTB1,RND3,SRC
Protein Kinase A Signaling	0	0.0174	CREM,DUSP6,EYA2,MPPED2,PRKACB,PTPRE,VASP
Regulation of IL-2 Expression in Activated and Anergic T Lymphocytes	0	0.00868	FOS,FYN,IKBKE,JUN
Nur77 Signaling in T Lymphocytes	0	0.0122	BCL2,HLA-DPA1,HLA-DPB1,HLA-DQA1,HLA-DRA,HLA-DRB1
OX40 Signaling Pathway	0	0.0197	BCL2,BCL2L1,HLA-DPA1,HLA-DPB1,HLA-DQA1,HLA-DRA,HLA-DRB1,JUN,TNFSF4
Cell Cycle Control of Chromosomal Replication	0	0.0179	CDK6
Dopamine-DARPP32 Feedback in cAMP Signaling	0	0.0166	CREM,PPP2R2B,PRKACB
Gap Junction Signaling	0	0.0152	PIK3R3,PRKACB,SRC
Hematopoiesis from Pluripotent Stem Cells	0	0.00478	CSF1,IL6
Transcriptional Regulatory Network in Embryonic Stem Cells	0	0.0185	NANOG
Ephrin B Signaling	0	0.0139	LIMK1
ErbB4 Signaling	0	0.0147	PIK3R3
Netrin Signaling	0	0.0139	PRKACB
Stearate Biosynthesis I (Animals)	0	0.0189	ACSL5
Epithelial Adherens Junction Signaling	0	0.0127	SRC,TGFBR3
Remodeling of Epithelial Adherens Junctions	0	0.0147	SRC
Tec Kinase Signaling	0	0.018	FGR,FOS,FYN,ITGAV,ITGB3,PIK3R3,RHOBTB1,RND3,SRC,TNF
HIPPO signaling	0	0.0118	PPP2R2B
SAPK/JNK Signaling	0	0.00833	GAB1,JUN,MAP3K9,PIK3R3
Cardiac β-adrenergic Signaling	0	0.0172	MPPED2,PPP2R2B,PRKACB
Protein Ubiquitination Pathway	0	0.0145	DNAJB4,USP18,USP41,USP45
Amyloid Processing	0	0.0196	PRKACB
GABA Receptor Signaling	0	0.00763	KCNN4
Phototransduction Pathway	0	0.0185	PRKACB
Glutamate Receptor Signaling	0	0.0152	SLC1A3
GPCR-Mediated Integration of Enteroendocrine Signaling Exemplified by an L Cell	0	0.0137	PRKACB
GPCR-Mediated Nutrient Sensing in Enteroendocrine Cells	0	0.0172	FFAR2,PRKACB
Th17 Activation Pathway	0	0.00649	IL1B,IL6,IRAK2
Apelin Cardiomyocyte Signaling Pathway	0	0.0101	PIK3R3
BAG2 Signaling Pathway	0	0.0119	MYC
FAT10 Signaling Pathway	0	0.0179	TNF
HOTAIR Regulatory Pathway	0	0.0184	MMP19,MYC,PIK3R3
Regulation Of The Epithelial Mesenchymal Transition In Development Pathway	0	0.0115	JAG1
Calcium Signaling	0	0.00926	PRKACB,RCAN2
Eicosanoid Signaling	0	0.0149	PLB1
