# Supplementary material for: C5a Activates a Pro-Inflammatory Gene Expression Profile in Human Gaucher iPSC-Derived Macrophages
Source: Int J Mol Sci. 2021 Sep 14;22(18):9912. doi: 10.3390/ijms22189912 (PMC8466165; doi:10.3390/ijms22189912)
Supplement: Supplementary file 1 [file ijms-22-09912-s001.zip › Supplemental Table S4D.xls]

## Sheet: Sheet0
Ingenuity Canonical Pathways	-log(p-value)	Ratio	Molecules
Hepatic Fibrosis Signaling Pathway	10.1	0.124	ACVR1B,AGT,BCL2,CCL2,CCL3,CCND1,CDKN1B,CEBPB,EDN1,EDNRA,ELK1,FOS,ICAM1,IKBKE,IL17RA,IL1B,IL1R2,IL1RN,IRAK2,IRAK3,ITGA5,ITGA9,ITGAV,ITGB3,ITGB8,KLF9,MAP2K3,MAP2K6,MAPK10,MMP1,MRAS,MYC,MYLK,NFKBID,PDCD4,PDGFA,PDGFB,PIK3R3,PPARG,PRKACB,PRKCH,RHOBTB1,RHOBTB2,RND3,SMAD3,SMO,SOS2,TCF7L2,TGFB3,TNF,VEGFA,WNT5A
Role of Macrophages, Fibroblasts and Endothelial Cells in Rheumatoid Arthritis	8.8	0.129	CCL2,CCND1,CEBPB,CSF1,DKK2,FOS,ICAM1,IKBKE,IL10,IL17RA,IL1B,IL1R2,IL1RN,IL6,IRAK2,IRAK3,MAP2K3,MAP2K6,MAPKAPK2,MMP1,MRAS,MYC,NFAT5,NFATC1,NFKBID,PDGFA,PDGFB,PIK3R3,PRKCH,ROR2,SMO,SRC,TCF7L2,TLR10,TLR5,TLR7,TLR8,TNF,TRAF1,TRAF3IP2,VEGFA,WNT5A
TREM1 Signaling	8.04	0.234	CASP1,CASP5,CCL2,CCL3,CCL7,CD83,CIITA,FCGR2B,ICAM1,IL10,IL1B,IL6,ITGA5,TLR10,TLR5,TLR7,TLR8,TNF
Tumor Microenvironment Pathway	7.87	0.156	BCL2,CCL2,CCND1,CSF1,FOS,FOXO3,ICAM1,IGF1,IL10,IL1B,IL6,ITGA5,ITGB3,MMP1,MMP15,MMP19,MRAS,MYC,PDCD1LG2,PDGFA,PDGFB,PIK3R3,PTGS2,SLC2A3,TGFB3,TIAM1,TNF,VEGFA
Role of Osteoblasts, Osteoclasts and Chondrocytes in Rheumatoid Arthritis	7.35	0.138	BCL2,BMP2,BMP6,CALCR,CSF1,CTSK,DKK2,FOS,IGF1,IKBKE,IL10,IL1B,IL1R2,IL1RN,IL6,ITGA5,ITGB3,MAP2K3,MAP2K6,MAPK10,MMP1,NAIP,NFAT5,NFATC1,NFKBID,PIK3R3,SMO,SRC,TCF7L2,TNF,WNT5A
Cardiac Hypertrophy Signaling (Enhanced)	7.17	0.1	ACVR1B,AGT,CXCR2,EDN1,EDNRA,EDNRB,EIF4E,ELK1,FICD,GDE1,GDPD1,GNA12,GNA13,HDAC7,HDAC9,HSPB1,IFNLR1,IGF1,IKBKE,IL17RA,IL1B,IL1R2,IL6,INPP5F,ITGA5,ITGA9,ITGAV,ITGB3,ITGB8,MAP2K3,MAP2K6,MAP3K12,MAPK10,MAPKAPK2,MEF2D,MRAS,MYC,NFAT5,NFATC1,PDE8A,PDE9A,PIK3R3,PRKACB,PRKCH,PTGS2,RCAN1,RPS6KA5,SMO,SRF,TGFB3,TNF,TNFSF10,TNFSF15,WNT5A
Osteoarthritis Pathway	6.92	0.132	ANKH,BMP2,CASP1,CASP5,CASP6,CEBPB,CXCR2,DDIT4,FOXO3,GREM1,IL1B,IL1R2,ITGA5,ITGA9,ITGAV,ITGB3,ITGB8,MMP1,MTF1,MYBBP1A,PPARD,PPARG,PTGS2,SDC4,SLC39A8,SMAD3,SMO,TCF7L2,TIMP3,TNF,VEGFA
Molecular Mechanisms of Cancer	6.56	0.103	ATM,BCL2,BCL2L1,BMP2,BMP6,CASP6,CCND1,CDK17,CDK6,CDKN1B,E2F8,ELK1,FOS,FYN,GAB1,GNA12,GNA13,HDAC7,HDAC9,ITGA5,ITGA9,ITGAV,ITGB3,ITGB8,MAP2K3,MAP2K6,MAPK10,MRAS,MYC,NAIP,NFKBID,PIK3R3,PRKACB,PRKCH,RAPGEF1,RASA1,RASGRF2,RHOBTB1,RHOBTB2,RND3,SMAD3,SMO,SOS2,SRC,TGFB3,WNT5A
Role of Tissue Factor in Cancer	6.5	0.172	BCL2L1,CSF1,EGR1,EIF4E,FGR,FYN,GNA12,GNA13,HBEGF,IL1B,ITGAV,ITGB3,LIMK1,MMP1,MRAS,PIK3R3,PLAUR,RPS6KA5,SRC,VEGFA
IL-8 Signaling	6.33	0.133	BCL2,BCL2L1,CCND1,CXCR2,FOS,GNA12,GNA13,HBEGF,ICAM1,IKBKE,IRAK2,IRAK3,ITGAV,ITGB3,LIMK1,MAPK10,MRAS,PIK3R3,PLD1,PLD4,PRKCH,PTGS2,RHOBTB1,RHOBTB2,RND3,SRC,VASP,VEGFA
Cholecystokinin/Gastrin-mediated Signaling	6.32	0.168	ELK1,FOS,GNA12,GNA13,IL1B,IL1RN,MAP2K3,MAP2K6,MAPK10,MEF2D,MRAS,PRKCH,PTGS2,RHOBTB1,RHOBTB2,RND3,SOS2,SRC,SRF,TNF
Systemic Lupus Erythematosus In B Cell Signaling Pathway	6.23	0.119	BCL2,BCL2L1,BLNK,CCND1,FCGR2B,FGR,FOS,FOXO3,FYN,GAB1,IL10,IL1B,IL6,INPP5F,MALT1,MRAS,MYC,NFAT5,NFATC1,PIK3R3,PIM2,PRKCH,PTPN6,SOS2,SRC,SYK,TGFB3,TLR7,TLR8,TNF,TNFSF10,TNFSF15,TRAF1
ERK/MAPK Signaling	6.2	0.131	DUSP1,DUSP2,DUSP4,DUSP6,EIF4E,ELK1,FOS,FYN,HSPB1,ITGA5,ITGA9,ITGAV,ITGB3,ITGB8,MRAS,MYC,NFATC1,PIK3R3,PPARG,PPP1R14C,PRKACB,RAPGEF1,RPS6KA5,SOS2,SRC,SRF,TLN2,YWHAG
IL-6 Signaling	5.8	0.156	CEBPB,ELK1,FOS,HSPB1,IKBKE,IL1B,IL1R2,IL1RN,IL6,MAP2K3,MAP2K6,MAPK10,MAPKAPK2,MRAS,NFKBID,PIK3R3,SOS2,SRF,TNF,VEGFA
Toll-like Receptor Signaling	5.65	0.192	ELK1,FOS,IL1B,IL1RN,IRAK2,IRAK3,MAP2K3,MAP2K6,PPARA,TLR10,TLR5,TLR7,TLR8,TNF,TRAF1
Colorectal Cancer Metastasis Signaling	5.59	0.115	BCL2L1,CCND1,FOS,GNA12,GNA13,IL6,MAPK10,MMP1,MMP15,MMP19,MRAS,MYC,PIK3R3,PRKACB,PTGS2,RHOBTB1,RHOBTB2,RND3,SMAD3,SMO,SOS2,SRC,TCF7L2,TGFB3,TLR10,TLR5,TLR7,TLR8,TNF,VEGFA,WNT5A
Glucocorticoid Receptor Signaling	5.42	0.0895	AGT,AR,ATP5F1D,BCL2,BCL2L1,CCL2,CCL3,CXCR2,DUSP1,ELK1,FOS,FOXO3,G6PC,HLA-DMB,ICAM1,IFNLR1,IGF1,IKBKE,IL10,IL17RA,IL1B,IL1R2,IL1RN,IL6,KRT9,MAPK10,MMP1,MRAS,MYC,NCOA2,NFAT5,NFATC1,NFKBID,NRIP1,PCK2,PDK4,PIK3R3,POLR2A,POLR2H,PPARG,PRKACB,PTGS2,RARG,RPS6KA5,SGK1,SMAD3,SMARCA2,SOS2,SRC,TFB2M,TGFB3,TNF
ERK5 Signaling	5.37	0.194	FOS,FOSL1,FOXO3,GAB1,GNA12,GNA13,MEF2D,MRAS,MYC,RPS6KA5,SGK1,SH2D2A,SRC,YWHAG
PI3K/AKT Signaling	5.28	0.126	BCL2,BCL2L1,CCND1,CDKN1B,CXCR2,EIF4E,FOXO3,GAB1,IFNLR1,IKBKE,IL17RA,IL1R2,INPP5F,ITGA5,ITGA9,ITGAV,ITGB3,ITGB8,LIMS1,MRAS,NFKBID,PIK3R3,PTGS2,SOS2,YWHAG
IL-17A Signaling in Fibroblasts	5.23	0.263	CCL2,CCL7,CEBPB,FOS,IKBKE,IL17RA,IL6,MMP1,NFKBID,TRAF3IP2
Cell Cycle: G1/S Checkpoint Regulation	4.95	0.191	ATM,CCND1,CDK6,CDKN1B,E2F8,FBXL5,GNL3,HDAC7,HDAC9,MYC,SKP2,SMAD3,TGFB3
IL-10 Signaling	4.67	0.181	ELK1,FCGR2B,FOS,IKBKE,IL10,IL1B,IL1R2,IL1RN,IL6,MAP2K3,MAP2K6,NFKBID,TNF
Neuroinflammation Signaling Pathway	4.61	0.102	ACVR1B,BCL2,CASP1,CCL2,CCL3,CD200R1,CX3CR1,FOS,GABRE,GLUL,HLA-DMB,ICAM1,IKBKE,IL10,IL1B,IL6,IRAK2,IRAK3,MAPK10,NAIP,NFAT5,NFATC1,PIK3R3,PTGS2,SLC1A3,SYK,TGFB3,TLR10,TLR5,TLR7,TLR8,TNF
p38 MAPK Signaling	4.55	0.144	DUSP1,ELK1,HSPB1,IL1B,IL1R2,IL1RN,IRAK2,IRAK3,MAP2K3,MAP2K6,MAPKAPK2,MEF2D,MYC,RPS6KA5,SRF,TGFB3,TNF
PPAR Signaling	4.52	0.15	FOS,IKBKE,IL1B,IL1R2,IL1RN,MRAS,NFKBID,NRIP1,PDGFA,PDGFB,PPARA,PPARD,PPARG,PTGS2,SOS2,TNF
HGF Signaling	4.45	0.136	CCND1,ELK1,FOS,GAB1,IL6,ITGA5,ITGA9,ITGAV,ITGB3,ITGB8,MAP3K12,MAPK10,MRAS,PIK3R3,PRKCH,PTGS2,RAPGEF1,SOS2
HER-2 Signaling in Breast Cancer	4.43	0.117	AREG,CASP6,CCND1,CDKN1B,COX7B2,ELK1,FGR,FOS,FOXO3,FYN,HBEGF,IKBKE,ITGB3,ITGB8,MRAS,MYC,NFKBID,PIK3R3,PRKCH,PTGS2,SMAD3,SOS2,SRC
p53 Signaling	4.4	0.153	ATM,BCL2,BCL2L1,CASP6,CCND1,GNL3,HDAC9,JMY,PCNA,PIK3R3,PLAGL1,RRM2B,THBS1,TNFRSF10A,TP53INP1
Role of IL-17A in Arthritis	4.31	0.193	CCL2,CCL7,IL17RA,MAP2K3,MAP2K6,MAPK10,MAPKAPK2,MMP1,NFKBID,PIK3R3,PTGS2
Granulocyte Adhesion and Diapedesis	4.21	0.116	CCL1,CCL18,CCL2,CCL24,CCL3,CCL3L3,CCL4L1/CCL4L2,CCL7,CLDN4,CXCL16,CXCR2,HRH1,ICAM1,IL1B,IL1R2,IL1RN,MMP1,MMP15,MMP19,SDC4,SELPLG,TNF
Pancreatic Adenocarcinoma Signaling	4.18	0.135	BCL2,BCL2L1,CCND1,CDKN1B,E2F8,ELK1,HBEGF,HDAC7,HDAC9,MAPK10,PIK3R3,PLD1,PLD4,PTGS2,SMAD3,TGFB3,VEGFA
Regulation Of The Epithelial Mesenchymal Transition By Growth Factors Pathway	4.11	0.115	EGR1,FOS,GAB1,HSF1,IKBKE,IL6,MAP2K3,MAP2K6,MAPK10,MMP1,MRAS,PDGFA,PDGFB,PIK3R3,SMAD3,SOS2,TGFB3,TNF,TNFSF10,TNFSF15,TNFSF18,ZEB1
Hepatic Fibrosis / Hepatic Stellate Cell Activation	4.04	0.113	AGT,BCL2,CCL2,CSF1,EDN1,EDNRA,EDNRB,ICAM1,IGF1,IL10,IL1B,IL1R2,IL6,KLF6,MMP1,MYO10,PDGFA,PDGFB,SMAD3,TGFB3,TNF,VEGFA
B Cell Receptor Signaling	4.04	0.113	BCL2A1,BCL2L1,BCL6,BLNK,EGR1,ELK1,FCGR2B,GAB1,IKBKE,INPP5F,MALT1,MAP2K3,MAP2K6,MAP3K12,MRAS,NFAT5,NFATC1,NFKBID,PIK3R3,PTPN6,SOS2,SYK
Neuregulin Signaling	4.04	0.137	AREG,CDKN1B,ELK1,HBEGF,ITGA5,ITGA9,ITGAV,ITGB3,ITGB8,MATK,MRAS,MYC,PIK3R3,PRKCH,SOS2,SRC
Differential Regulation of Cytokine Production in Macrophages and T Helper Cells by IL-17A and IL-17F	3.97	0.333	CCL2,CCL3,IL10,IL1B,IL6,TNF
Small Cell Lung Cancer Signaling	3.91	0.146	BCL2,BCL2L1,CCND1,CDK6,CDKN1B,HDAC7,HDAC9,IKBKE,MYC,NFKBID,PIK3R3,PTGS2,SKP2,TRAF1
Aryl Hydrocarbon Receptor Signaling	3.87	0.119	ALDH1A2,ALDH2,ATM,CCND1,CDK6,CDKN1B,FOS,HSPB1,IL1B,IL6,MYC,NCOA2,NFIA,NRIP1,RARG,SRC,TGFB3,TGM2,TNF
Agranulocyte Adhesion and Diapedesis	3.84	0.107	CCL1,CCL18,CCL2,CCL24,CCL3,CCL3L3,CCL4L1/CCL4L2,CCL7,CLDN4,CXCL16,CXCR2,HRH1,ICAM1,IL1B,IL1RN,ITGA5,MMP1,MMP15,MMP19,MYO10,SDC4,SELPLG,TNF
Role of Hypercytokinemia/hyperchemokinemia in the Pathogenesis of Influenza	3.84	0.151	AREG,CASP1,CCL2,CCL3,IFNLR1,IL10,IL1B,IL1RN,IL6,MX1,OAS1,TLR7,TNF
PDGF Signaling	3.84	0.151	ABL2,ELK1,FOS,INPP5F,MRAS,MYC,PDGFA,PDGFB,PIK3R3,RASA1,SOS2,SRC,SRF
LXR/RXR Activation	3.78	0.13	ABCA1,ABCG1,AGT,CCL2,CCL7,CYP51A1,IL1B,IL1R2,IL1RN,IL6,LPL,MYLIP,PCYOX1,PTGS2,SERPINF1,TNF
IL-15 Production	3.78	0.13	ABL2,DYRK3,EPHB2,FES,FGR,FYN,IL6,IRF1,MAP2K3,MAP2K6,MATK,ROR2,SRC,SYK,TEC,TXK
Phagosome Formation	3.76	0.121	FCAR,FCGR2B,ITGA5,ITGA9,ITGAV,ITGB3,ITGB8,MARCKS,PIK3R3,PRKCH,RHOBTB1,RHOBTB2,RND3,SYK,TLR10,TLR5,TLR7,TLR8
Coronavirus Pathogenesis Pathway	3.76	0.108	AGT,AR,BCL2,CASP1,CCL2,CCND1,E2F8,EIF4E,ELK1,FOS,HDAC7,HDAC9,IL17RA,IL1B,IL6,MAPK10,NFKBID,OAS1,PTGS2,RPS25,SMAD3,TLR7
CD40 Signaling	3.65	0.164	FOS,ICAM1,IKBKE,MAP2K3,MAP2K6,MAPK10,MAPKAPK2,NFKBID,PIK3R3,PTGS2,TRAF1
Chronic Myeloid Leukemia Signaling	3.41	0.131	BCL2L1,CCND1,CDK6,CDKN1B,E2F8,HDAC7,HDAC9,IKBKE,MRAS,MYC,PIK3R3,SMAD3,SOS2,TGFB3
IL-17 Signaling	3.39	0.107	CCL2,CEBPB,ELK1,FOS,IL17RA,IL1B,IL6,MAP2K3,MAP2K6,MAPK10,MRAS,PIK3R3,PTGS2,RGS16,TGFB3,TNF,TNFSF10,TNFSF15,TRAF3IP2,VEGFA
PEDF Signaling	3.35	0.143	BCL2,BCL2L1,ELK1,IKBKE,MRAS,NFKBID,PIK3R3,PPARG,SERPINF1,SRF,TCF7L2,ZEB1
STAT3 Pathway	3.32	0.119	BCL2,BMP6,CXCR2,IFNLR1,IGF1,IL17RA,IL1B,IL1R2,MAP3K12,MAPK10,MRAS,MYC,PDGFB,PTPN6,SRC,VEGFA
Adipogenesis pathway	3.32	0.119	BMP2,CEBPB,DGKD,EGR2,FABP4,HDAC7,HDAC9,KLF3,LPL,NR1D2,PER2,PPARG,SMAD3,SMO,TNF,WNT5A
PTEN Signaling	3.26	0.113	BCL2,BCL2L1,CCND1,CDKN1B,CNKSR3,FOXO3,IKBKE,INPP5F,ITGA5,ITGA9,ITGAV,ITGB3,ITGB8,MAGI1,MRAS,PIK3R3,SOS2
April Mediated Signaling	3.25	0.19	ELK1,FOS,IKBKE,MAPK10,NFAT5,NFATC1,NFKBID,TRAF1
LPS/IL-1 Mediated Inhibition of RXR Function	3.2	0.0952	ABCA1,ABCC4,ABCG1,ACSL4,ALAS1,ALDH1A2,ALDH2,CHST11,CHST15,CHST7,FABP3,FABP4,FABP5,FMO5,HS3ST3A1,HS3ST3B1,IL1B,IL1R2,IL1RN,PPARA,PPARGC1B,SLC27A2,TNF,UST
HIF1α Signaling	3.2	0.101	ADM,BMP6,CCNG2,EDN1,EIF4E,ELOC,IGF1,IL6,MAP2K3,MAP2K6,MMP1,MMP15,MMP19,MRAS,PDGFB,PIK3R3,PRKCH,SAT1,SLC2A14,SLC2A3,VEGFA
B Cell Activating Factor Signaling	3.17	0.186	ELK1,FOS,IKBKE,MAPK10,NFAT5,NFATC1,NFKBID,TRAF1
HMGB1 Signaling	3.15	0.108	CCL2,ELK1,FOS,ICAM1,IL1B,IL6,MAP2K3,MAP2K6,MAPK10,MRAS,PIK3R3,RHOBTB1,RHOBTB2,RND3,TGFB3,TNF,TNFSF10,TNFSF15
Regulation of Cellular Mechanics by Calpain Protease	3.12	0.135	CCND1,CDK6,CDKN1B,ITGA5,ITGA9,ITGAV,ITGB3,ITGB8,MRAS,SRC,TLN2,VCL
ILK Signaling	3.08	0.101	BMP2,CCND1,FERMT2,FOS,ITGB3,ITGB8,LIMS1,MAP2K6,MAPK10,MYC,MYO10,PIK3R3,PTGS2,RHOBTB1,RHOBTB2,RND3,RPS6KA5,TNF,VCL,VEGFA
Integrin Signaling	3.07	0.0986	FYN,ITGA5,ITGA9,ITGAV,ITGB3,ITGB8,LIMS1,MRAS,MYLK,NEDD9,PDGFB,PIK3R3,RAPGEF1,RHOBTB1,RHOBTB2,RND3,SOS2,SRC,TLN2,VASP,VCL
Role of Pattern Recognition Receptors in Recognition of Bacteria and Viruses	3.06	0.109	CASP1,EIF2S1,IL10,IL1B,IL6,MAPK10,OAS1,PIK3R3,PRKCH,SYK,TGFB3,TLR5,TLR7,TLR8,TNF,TNFSF10,TNFSF15
Gαq Signaling	3.06	0.106	CALCR,ELK1,GNA12,GNA13,HRH1,IKBKE,MRAS,NFATC1,NFKBID,PIK3R3,PLD1,PLD4,PRKCH,RGS16,RGS18,RHOBTB1,RHOBTB2,RND3
Role of IL-17F in Allergic Inflammatory Airway Diseases	3.04	0.178	CCL2,CCL7,IGF1,IL17RA,IL1B,IL6,RPS6KA5,TRAF3IP2
Acute Myeloid Leukemia Signaling	3.03	0.132	CCND1,JUP,KITLG,MAP2K3,MAP2K6,MRAS,MYC,PIK3R3,PIM2,RUNX1,SOS2,TCF7L2
Chondroitin Sulfate Biosynthesis	3.02	0.161	B3GALT6,CHST11,CHST15,CHST7,CHSY1,HS3ST3A1,HS3ST3B1,UST,XYLT1
Protein Kinase A Signaling	3	0.0821	ADD3,AKAP11,AKAP3,DUSP1,DUSP2,DUSP4,DUSP5,DUSP6,ELK1,FICD,GDE1,GDPD1,GNA13,MYLK,NFAT5,NFATC1,NFKBID,PDE8A,PDE9A,PPP1R14C,PRKACB,PRKCH,PTGS2,PTPN6,PTPN7,PTPRE,SMAD3,SMO,TCF7L2,TGFB3,UBASH3B,VASP,YWHAG
PAK Signaling	2.98	0.119	ITGA5,ITGA9,ITGAV,ITGB3,ITGB8,LIMK1,MAPK10,MRAS,MYLK,PDGFA,PDGFB,PIK3R3,SOS2,TNF
Actin Nucleation by ARP-WASP Complex	2.95	0.129	GNA12,ITGA5,ITGA9,ITGAV,ITGB3,ITGB8,MRAS,RHOBTB1,RHOBTB2,RND3,SOS2,VASP
IL-1 Signaling	2.91	0.128	FOS,GNA12,GNA13,IKBKE,IRAK2,IRAK3,MAP2K3,MAP2K6,MAPK10,MRAS,NFKBID,PRKACB
Endothelin-1 Signaling	2.88	0.0995	CASP1,CASP5,CASP6,EDN1,EDNRA,EDNRB,FOS,GAB1,GNA12,GNA13,MAPK10,MRAS,MYC,PIK3R3,PLD1,PLD4,PRKCH,PTGS2,SRC
Senescence Pathway	2.88	0.0875	ACVR1B,ATF3,ATM,BHLHE40,CCND1,CDK6,CDKN1B,CEBPB,E2F8,EIF4E,FOXO3,IKBKE,IL6,MAP2K3,MAP2K6,MAPKAPK2,MRAS,MRE11,NFAT5,NFATC1,PDK4,PIK3R3,RPS6KA5,SMAD3,TGFB3,YPEL3
Erythropoietin Signaling Pathway	2.86	0.102	BCL2L1,CCND1,ELK1,FOS,FOXO3,IL1B,IL6,MRAS,NFKBID,PIK3R3,PRKCH,PTPN6,SOS2,SRC,TGFB3,TNF,TNFSF10,TNFSF15
D-myo-inositol (1,4,5,6)-Tetrakisphosphate Biosynthesis	2.86	0.102	DOT1L,DUSP1,DUSP14,DUSP2,DUSP4,DUSP5,DUSP6,FIG4,G6PC,INPP5F,PGAM5,PPFIBP2,PPM1K,PPP1R14C,PTPN6,PTPN7,RASA1,TNS3
D-myo-inositol (3,4,5,6)-tetrakisphosphate Biosynthesis	2.86	0.102	DOT1L,DUSP1,DUSP14,DUSP2,DUSP4,DUSP5,DUSP6,FIG4,G6PC,INPP5F,PGAM5,PPFIBP2,PPM1K,PPP1R14C,PTPN6,PTPN7,RASA1,TNS3
Dermatan Sulfate Biosynthesis	2.85	0.153	B3GALT6,CHST11,CHST15,CHST7,CHSY1,HS3ST3A1,HS3ST3B1,UST,XYLT1
Death Receptor Signaling	2.83	0.125	BCL2,CASP6,HSPB1,IKBKE,LIMK1,LMNA,NAIP,NFKBID,TNF,TNFRSF10A,TNFSF10,TNFSF15
Role of PKR in Interferon Induction and Antiviral Response	2.82	0.11	ATF3,CASP1,CASP5,EIF2S1,FOS,IKBKE,IL1B,IRF1,MAP2K3,MAP2K6,MAPK10,NFKBID,PDGFA,PDGFB,TNF
LPS-stimulated MAPK Signaling	2.76	0.129	ELK1,FOS,IKBKE,MAP2K3,MAP2K6,MAPK10,MRAS,NFKBID,PIK3R3,PRKCH,SRF
Inflammasome pathway	2.75	0.25	CASP1,CASP5,IL1B,NAIP,PANX1
Salvage Pathways of Pyrimidine Ribonucleotides	2.75	0.122	CDK6,CMPK2,DAPK1,G6PC,GRK5,LIMK1,MAP2K3,MAP2K6,PRKCH,SGK1,UCK2,UPP1
RAR Activation	2.74	0.0969	ALDH1A2,BMP2,DHRS3,DUSP1,FOS,MAPK10,MAPKAPK2,MMP1,NRIP1,PIK3R3,PRKACB,PRKCH,RARG,RPL7A,SMAD3,SMARCA2,SRC,TGFB3,VEGFA
FAT10 Cancer Signaling Pathway	2.73	0.16	ACVR1B,IKBKE,IL6,PCNA,SMAD3,TCF7L2,TGFB3,TNF
VEGF Signaling	2.71	0.121	BCL2,BCL2L1,EIF2S1,FOXO3,MRAS,PIK3R3,PTPN6,SH2D2A,SOS2,SRC,VCL,VEGFA
Adrenomedullin signaling pathway	2.67	0.0955	ADM,BCL2,CEBPB,ELK1,FOS,IL1B,IL1RN,KCNN4,MAP2K3,MAP2K6,MAPK10,MATK,MRAS,MYLK,PIK3R3,PPARG,PRKACB,SOS2,TNF
G-Protein Coupled Receptor Signaling	2.66	0.087	CALCR,CXCR2,DUSP1,DUSP4,DUSP6,FFAR3,FICD,FYN,GDE1,GDPD1,HRH1,IKBKE,MRAS,NFKBID,P2RY13,PDE8A,PDE9A,PIK3R3,PRKACB,RASA1,RGS16,RGS18,SOS2,SRC
Glioblastoma Multiforme Signaling	2.63	0.0994	CCND1,CDK6,CDKN1B,E2F8,IGF1,MRAS,MYC,PDGFA,PDGFB,PIK3R3,RHOBTB1,RHOBTB2,RND3,SMO,SOS2,SRC,WNT5A
Ephrin Receptor Signaling	2.62	0.0945	EPHB2,FYN,GNA12,GNA13,ITGA5,ITGA9,ITGAV,ITGB3,ITGB8,LIMK1,MRAS,PDGFA,PDGFB,RAPGEF1,RASA1,RGS3,SOS2,SRC,VEGFA
Macropinocytosis Signaling	2.61	0.132	CSF1,ITGA5,ITGB3,ITGB8,MRAS,PDGFA,PDGFB,PIK3R3,PRKCH,SRC
Endocannabinoid Cancer Inhibition Pathway	2.61	0.105	ATF3,CASP1,CASP5,CASP6,CCND1,CDKN1B,GNA13,MAP2K3,MAP2K6,MYC,PIK3R3,PRKACB,SRC,TCF7L2,VEGFA
Superpathway of Inositol Phosphate Compounds	2.58	0.0901	DOT1L,DUSP1,DUSP14,DUSP2,DUSP4,DUSP5,DUSP6,FIG4,G6PC,INPP5A,INPP5F,ITPKB,PGAM5,PIK3R3,PPFIBP2,PPM1K,PPP1R14C,PTPN6,PTPN7,RASA1,TNS3
Atherosclerosis Signaling	2.58	0.108	CCL2,CSF1,ICAM1,IL1B,IL1RN,IL6,LPL,MMP1,PCYOX1,PDGFA,PDGFB,SELPLG,TNF,TNFRSF12A
3-phosphoinositide Biosynthesis	2.57	0.0936	DOT1L,DUSP1,DUSP14,DUSP2,DUSP4,DUSP5,DUSP6,FIG4,G6PC,INPP5F,PGAM5,PIK3R3,PPFIBP2,PPM1K,PPP1R14C,PTPN6,PTPN7,RASA1,TNS3
FAK Signaling	2.55	0.111	FYN,ITGA5,ITGA9,ITGAV,ITGB3,ITGB8,MRAS,PIK3R3,SOS2,SRC,TLN2,TNS1,VCL
Hepatic Cholestasis	2.55	0.0952	ABCB4,IKBKE,IL1B,IL1R2,IL1RN,IL6,IRAK2,IRAK3,MAPK10,NFKBID,PPARA,PPRC1,PRKACB,PRKCH,TGFB3,TNF,TNFSF10,TNFSF15
3-phosphoinositide Degradation	2.55	0.0952	DOT1L,DUSP1,DUSP14,DUSP2,DUSP4,DUSP5,DUSP6,FIG4,G6PC,INPP5F,PGAM5,PPFIBP2,PPM1K,PPP1R14C,PTPN6,PTPN7,RASA1,TNS3
IL-7 Signaling Pathway	2.53	0.128	BCL2,BCL6,CCND1,CDKN1B,FOXO3,FYN,MYC,NFATC1,PIK3R3,SOS2
RANK Signaling in Osteoclasts	2.52	0.121	ELK1,FOS,IKBKE,MAP2K6,MAP3K12,MAPK10,MITF,NFATC1,NFKBID,PIK3R3,SRC
TNFR2 Signaling	2.52	0.188	FOS,IKBKE,NAIP,NFKBID,TNF,TRAF1
Pyridoxal 5'-phosphate Salvage Pathway	2.51	0.136	CDK6,DAPK1,G6PC,GRK5,LIMK1,MAP2K3,MAP2K6,PRKCH,SGK1
Sertoli Cell-Sertoli Cell Junction Signaling	2.5	0.0922	CLDN4,ELK1,EPB41,ITGA5,ITGA9,ITGAV,ITGB3,ITGB8,JUP,MAP2K3,MAP3K12,MAPK10,MRAS,PRKACB,SRC,TGFB3,TNF,TUBB6,VCL
Differential Regulation of Cytokine Production in Intestinal Epithelial Cells by IL-17A and IL-17F	2.47	0.217	CCL2,CCL3,IL10,IL1B,TNF
Superpathway of D-myo-inositol (1,4,5)-trisphosphate Metabolism	2.47	0.217	IMPA2,INPP1,INPP5A,INPP5F,ITPKB
PD-1, PD-L1 cancer immunotherapy pathway	2.46	0.113	BCL2L1,CBLB,CDKN1B,ELK1,HLA-DMB,PDCD1LG2,PDCD4,PIK3R3,SKP2,SMAD3,TGFB3,TNF
Circadian Rhythm Signaling	2.45	0.182	BHLHE40,BHLHE41,CRY1,NR1D1,PER1,PER2
D-myo-inositol-5-phosphate Metabolism	2.45	0.0933	DOT1L,DUSP1,DUSP14,DUSP2,DUSP4,DUSP5,DUSP6,FIG4,G6PC,INPP5F,PGAM5,PPFIBP2,PPM1K,PPP1R14C,PTPN6,PTPN7,RASA1,TNS3
Axonal Guidance Signaling	2.42	0.0731	ABLIM1,BMP2,BMP6,EIF4E,EPHB2,FES,FYN,GNA12,GNA13,IGF1,ITGA5,ITGA9,ITGAV,ITGB3,ITGB8,LIMK1,MMP1,MMP15,MRAS,NFAT5,NFATC1,PDGFA,PDGFB,PIK3R3,PLXNA3,PRKACB,PRKCH,RASA1,RGS3,SEMA7A,SMO,SOS2,SRGAP3,TUBB6,VASP,VEGFA,WNT5A
Fcγ Receptor-mediated Phagocytosis in Macrophages and Monocytes	2.41	0.117	FGR,FYB1,FYN,PIK3R3,PLD1,PLD4,PRKCH,SRC,SYK,TLN2,VASP
Melanocyte Development and Pigmentation Signaling	2.41	0.117	BCL2,KITLG,MITF,MRAS,PIK3R3,PRKACB,PTPN6,RPS6KA5,SH2B2,SOS2,SRC
ErbB Signaling	2.41	0.117	AREG,ELK1,FOS,HBEGF,MAP2K3,MAP2K6,MAPK10,MRAS,PIK3R3,PRKCH,SOS2
Paxillin Signaling	2.39	0.111	ITGA5,ITGA9,ITGAV,ITGB3,ITGB8,MAPK10,MRAS,PIK3R3,SOS2,SRC,TLN2,VCL
CD27 Signaling in Lymphocytes	2.36	0.14	BCL2L1,FOS,IKBKE,MAP2K3,MAP2K6,MAP3K12,MAPK10,NFKBID
Opioid Signaling Pathway	2.35	0.0833	CDKN1B,ELK1,FGR,FOS,FYN,GNA12,GNA13,GRK5,MAP2K3,MAP2K6,MRAS,MYC,PRKACB,PRKCH,RGS1,RGS16,RGS18,RGS3,RPS6KA5,SOS2,SRC,SRF,TCF7L2
Autophagy	2.34	0.0892	ATM,BCL2,BMP6,CDKN1B,DAPK1,FOS,FOXO3,IGF1,MAPK10,MYC,PDGFB,PIK3R3,PRKACB,RAB7B,SESN1,SLC7A5,TNF,UVRAG,VEGFA
TGF-β Signaling	2.34	0.115	ACVR1B,BCL2,BMP2,FOS,MAP2K3,MAP2K6,MRAS,SMAD3,SOS2,TGFB3,ZFYVE9
Actin Cytoskeleton Signaling	2.33	0.0857	ABI2,FGD3,GNA12,GNA13,ITGA5,ITGA9,ITGAV,ITGB3,ITGB8,LIMK1,MATK,MRAS,MYLK,MYO10,PDGFA,PDGFB,PIK3R3,SOS2,TIAM1,TLN2,VCL
Cyclins and Cell Cycle Regulation	2.29	0.119	ATM,CCND1,CDK6,CDKN1B,E2F8,FBXL5,HDAC7,HDAC9,SKP2,TGFB3
Acute Phase Response Signaling	2.28	0.0919	AGT,CEBPB,ELK1,FOS,IKBKE,IL1B,IL1RN,IL6,MAP2K3,MAP2K6,MRAS,NFKBID,NOLC1,PIK3R3,SERPINF1,SOS2,TNF
FXR/RXR Activation	2.27	0.103	ABCB4,AGT,G6PC,IL1B,IL1RN,LPL,MAPK10,PCK2,PCYOX1,PPARA,PPARG,SERPINF1,TNF
Germ Cell-Sertoli Cell Junction Signaling	2.25	0.0936	JUP,LIMK1,MAP2K3,MAP2K6,MAP3K12,MAPK10,MRAS,PIK3R3,RHOBTB1,RHOBTB2,RND3,SRC,TGFB3,TNF,TUBB6,VCL
Estrogen-mediated S-phase Entry	2.22	0.192	CCND1,CDKN1B,E2F8,MYC,SKP2
Prolactin Signaling	2.22	0.116	CEBPB,FOS,FYN,IRF1,KCNMB4,MRAS,MYC,PIK3R3,PRKCH,SOS2
Chondroitin Sulfate Biosynthesis (Late Stages)	2.22	0.146	CHST11,CHST15,CHST7,CHSY1,HS3ST3A1,HS3ST3B1,UST
Glioma Invasiveness Signaling	2.21	0.123	ITGAV,ITGB3,MRAS,PIK3R3,PLAUR,RHOBTB1,RHOBTB2,RND3,TIMP3
PI3K Signaling in B Lymphocytes	2.2	0.0979	ATF3,BLNK,ELK1,FCGR2B,FOS,FOXO3,FYN,IKBKE,MALT1,MRAS,NFAT5,NFATC1,NFKBID,SYK
Ovarian Cancer Signaling	2.2	0.0949	BCL2,CCND1,EDN1,EDNRA,HDAC7,HDAC9,MRAS,PIK3R3,PRKACB,PTGS2,SMO,SRC,TCF7L2,VEGFA,WNT5A
TWEAK Signaling	2.2	0.162	CASP6,IKBKE,NAIP,NFKBID,TNFRSF12A,TRAF1
D-myo-inositol (1,4,5)-trisphosphate Degradation	2.18	0.235	IMPA2,INPP1,INPP5A,INPP5F
Bladder Cancer Signaling	2.15	0.103	CCND1,DAPK1,HDAC7,HDAC9,MMP1,MMP15,MMP19,MRAS,MYC,RPS6KA5,THBS1,VEGFA
Semaphorin Signaling in Neurons	2.14	0.129	FES,FYN,LIMK1,PLXNA3,RHOBTB1,RHOBTB2,RND3,SEMA7A
Docosahexaenoic Acid (DHA) Signaling	2.14	0.158	BCL2,BCL2A1,BCL2L1,IL1B,PIK3R3,SERPINF1
Caveolar-mediated Endocytosis Signaling	2.14	0.12	CAVIN1,DYRK3,FYN,ITGA5,ITGA9,ITGAV,ITGB3,ITGB8,SRC
Fc Epsilon RI Signaling	2.12	0.103	FYN,GAB1,INPP5F,MAP2K3,MAP2K6,MAPK10,MRAS,PIK3R3,PRKCH,SOS2,SYK,TNF
Neurotrophin/TRK Signaling	2.1	0.118	FOS,GAB1,MAP2K3,MAP2K6,MRAS,PIK3R3,SOS2,SPRY1,SPRY2
Role of MAPK Signaling in Inhibiting the Pathogenesis of Influenza	2.1	0.118	CCL2,IL1B,IL6,MAP2K3,MAP2K6,MAPK10,NFKBID,PTGS2,TNF
Sphingosine-1-phosphate Signaling	2.09	0.102	ACER2,CASP1,CASP5,CASP6,GNA12,GNA13,PDGFA,PDGFB,PIK3R3,RHOBTB1,RHOBTB2,RND3
IGF-1 Signaling	2.08	0.106	ELK1,FOS,FOXO3,IGF1,MRAS,PIK3R3,PRKACB,RASA1,SOS2,SRF,YWHAG
HOTAIR Regulatory Pathway	2.08	0.092	AGO2,AR,HSF1,ICAM1,IRF1,JARID2,MMP1,MMP15,MMP19,MYC,PIK3R3,RBM38,SRF,TCF7L2,WNT5A
Cardiac Hypertrophy Signaling	2.08	0.0814	EIF4E,ELK1,GNA12,GNA13,HSPB1,IGF1,IL6,MAP2K3,MAP2K6,MAP3K12,MAPK10,MAPKAPK2,MEF2D,MRAS,PIK3R3,PRKACB,RHOBTB1,RHOBTB2,RND3,SRF,TGFB3
Renin-Angiotensin Signaling	2.03	0.1	AGT,CCL2,ELK1,FOS,MAPK10,MRAS,PIK3R3,PRKACB,PRKCH,PTPN6,SOS2,TNF
PXR/RXR Activation	2.02	0.123	ALAS1,FOXO3,G6PC,IL6,PCK2,PPARA,PRKACB,TNF
Induction of Apoptosis by HIV1	2.02	0.123	BCL2,BCL2L1,IKBKE,MAPK10,NAIP,NFKBID,TNF,TRAF1
NAD Signaling Pathway	2	0.0927	BMP6,CEBPB,IGF1,NADK,NMRK1,NT5E,PDGFB,PIK3R3,POLR2A,POLR2H,SLC12A8,SLC29A3,SLC7A5,VEGFA
IL-12 Signaling and Production in Macrophages	2	0.0956	CEBPB,FOS,IKBKE,IL10,IRF1,MAPK10,PCYOX1,PIK3R3,PPARG,PRKCH,STAT4,TGFB3,TNF
Renal Cell Carcinoma Signaling	1.96	0.113	ELOC,FOS,GAB1,MRAS,PDGFB,PIK3R3,RAPGEF1,SOS2,VEGFA
Heparan Sulfate Biosynthesis	1.96	0.113	B3GALT6,CHST11,CHST15,CHST7,EXTL2,HS3ST3A1,HS3ST3B1,UST,XYLT1
Relaxin Signaling	1.95	0.0915	ELK1,FICD,FOS,GDE1,GDPD1,GNA12,GNA13,MRAS,NFKBID,PDE8A,PDE9A,PIK3R3,PRKACB,VEGFA
Rac Signaling	1.95	0.0942	ABI2,ELK1,ITGA5,ITGA9,ITGAV,ITGB3,ITGB8,LIMK1,MRAS,PIK3R3,PLD1,SH3RF1,TIAM1
Iron homeostasis signaling pathway	1.93	0.0935	BMP2,BMP6,CYBRD1,FBXL5,IL6,PDGFA,PDGFB,SKP2,SLC25A37,SLC39A14,SLC40A1,SLC46A1,SMAD3
Glioma Signaling	1.92	0.0968	CCND1,CDK6,E2F8,HDAC7,HDAC9,IGF1,MRAS,PDGFA,PDGFB,PIK3R3,PRKCH,SOS2
Insulin Receptor Signaling	1.9	0.0929	EIF4E,FOXO3,FYN,GAB1,INPP5F,MRAS,PIK3R3,PPP1R14C,PRKACB,RAPGEF1,SGK1,SOS2,STX4
EGF Signaling	1.9	0.127	ELK1,FOS,PIK3R3,RASA1,SOS2,SRC,SRF
JAK/Stat Signaling	1.89	0.11	BCL2L1,CEBPB,FOS,IL6,MRAS,PIK3R3,PTPN6,SOS2,STAT4
Reelin Signaling in Neurons	1.88	0.0952	FGR,FYN,ITGA5,LIMK1,MAP2K3,MAP2K6,MAPK10,NDEL1,PDK4,PIK3R3,RAPGEF1,SRC
GM-CSF Signaling	1.83	0.114	BCL2A1,BCL2L1,CCND1,ELK1,MRAS,PIK3R3,RUNX1,SOS2
tRNA Splicing	1.83	0.136	FICD,GDE1,GDPD1,PDE8A,PDE9A,TSEN2
Production of Nitric Oxide and Reactive Oxygen Species in Macrophages	1.82	0.0838	FOS,IKBKE,IRF1,MAP3K12,MAPK10,NFKBID,PCYOX1,PIK3R3,PPARA,PPP1R14C,PRKCH,PTPN6,RHOBTB1,RHOBTB2,RND3,TNF
Growth Hormone Signaling	1.8	0.113	ELK1,FOS,IGF1,PIK3R3,PRKCH,PTPN6,RPS6KA5,SRF
PPARα/RXRα Activation	1.77	0.0829	ABCA1,ACVR1B,IKBKE,IL1B,IL1R2,IL6,LPL,MAP2K3,MAP2K6,MRAS,NFKBID,PPARA,PRKACB,SMAD3,SOS2,TGFB3
Tight Junction Signaling	1.75	0.0843	CLDN4,CNKSR3,EPB41,FOS,HSF1,MYLK,MYO10,PRKACB,SNAP25,STX4,TGFB3,TIAM1,TNF,VASP,VCL
Dermatan Sulfate Biosynthesis (Late Stages)	1.74	0.13	CHST11,CHST15,CHST7,HS3ST3A1,HS3ST3B1,UST
Myo-inositol Biosynthesis	1.72	0.4	IMPA2,INPP5F
Cholesterol Biosynthesis I	1.71	0.231	CYP51A1,MSMO1,SQLE
Cholesterol Biosynthesis II (via 24,25-dihydrolanosterol)	1.71	0.231	CYP51A1,MSMO1,SQLE
Guanosine Nucleotides Degradation III	1.71	0.231	ACP3,NT5E,PNP
Cholesterol Biosynthesis III (via Desmosterol)	1.71	0.231	CYP51A1,MSMO1,SQLE
Endometrial Cancer Signaling	1.71	0.117	CCND1,ELK1,FOXO3,MRAS,MYC,PIK3R3,SOS2
Gα12/13 Signaling	1.71	0.0902	ELK1,GNA12,GNA13,IKBKE,MAPK10,MEF2D,MRAS,NFKBID,PIK3R3,RASA1,SRC,TEC
PCP pathway	1.71	0.117	JUNB,JUND,LGR4,MAPK10,ROR2,SMO,WNT5A
iNOS Signaling	1.7	0.128	FOS,IKBKE,IRAK2,IRAK3,IRF1,NFKBID
Sumoylation Pathway	1.7	0.0971	AR,FOS,MAPK10,MYB,PCNA,RHOBTB1,RHOBTB2,RND3,SENP3,ZEB1
Apoptosis Signaling	1.67	0.0962	BCL2,BCL2A1,BCL2L1,CASP6,IKBKE,LMNA,MRAS,NAIP,NFKBID,TNF
CXCR4 Signaling	1.65	0.0838	EGR1,ELK1,ELMO2,FOS,GNA12,GNA13,MAPK10,MRAS,PIK3R3,PRKCH,RHOBTB1,RHOBTB2,RND3,SRC
Semaphorin Neuronal Repulsive Signaling Pathway	1.65	0.0861	FES,FYN,ITGA5,ITGA9,ITGAV,ITGB3,ITGB8,LIMK1,MAP2K3,MAP2K6,PIK3R3,PLXNA3,PRKACB
GDNF Family Ligand-Receptor Interactions	1.63	0.105	FOS,GAB1,GFRA2,MAPK10,MRAS,PIK3R3,RASA1,SOS2
Signaling by Rho Family GTPases	1.63	0.0746	ELK1,FOS,GNA12,GNA13,ITGA5,ITGA9,ITGAV,ITGB3,ITGB8,LIMK1,MAP3K12,MAPK10,MRAS,MYLK,PIK3R3,PLD1,RHOBTB1,RHOBTB2,RND3,SEPTIN14
Interferon Signaling	1.63	0.139	BCL2,IFIT1,IRF1,MX1,OAS1
Urate Biosynthesis/Inosine 5'-phosphate Degradation	1.62	0.214	ACP3,NT5E,PNP
Breast Cancer Regulation by Stathmin1	1.61	0.0642	ADGRA3,ADGRD1,ADGRE2,ADGRE5,BMP6,CALCR,CCND1,CDK6,CDKN1B,CX3CR1,E2F8,EDNRA,EDNRB,FFAR2,FFAR3,FFAR4,GNA13,GPR141,GPR155,GPR18,GPR3,GPR33,GPR68,GPR84,HRH1,IGF1,LGR4,MRAS,P2RY13,PDGFB,PIK3R3,PPP1R14C,PRKACB,PRKCH,SMO,SOS2,TUBB6,VEGFA
Th1 Pathway	1.6	0.0902	HLA-DMB,ICAM1,IL10,IL6,IRF1,MAP2K6,NFATC1,NFIL3,NOTCH2,PIK3R3,STAT4
Sperm Motility	1.59	0.0748	ABL2,DYRK3,EPHB2,FES,FGR,FYN,GNA12,GNA13,MAP2K3,MAP2K6,MATK,MRAS,PRKACB,PRKCH,ROR2,SRC,SYK,TEC,TXK
Myc Mediated Apoptosis Signaling	1.58	0.12	BCL2,BCL2L1,IKBKE,MYC,PRKACB,TNF
UDP-N-acetyl-D-glucosamine Biosynthesis II	1.55	0.333	GNPNAT1,UAP1
Tryptophan Degradation to 2-amino-3-carboxymuconate Semialdehyde	1.55	0.333	KMO,TDO2
Zymosterol Biosynthesis	1.55	0.333	CYP51A1,MSMO1
Thyroid Cancer Signaling	1.55	0.101	CCND1,ELK1,FOS,IGF1,MRAS,MYC,PIK3R3,TCF7L2
Choline Biosynthesis III	1.54	0.2	PCYT1A,PLD1,PLD4
ErbB2-ErbB3 Signaling	1.53	0.108	CCND1,CDKN1B,ELK1,MRAS,MYC,PIK3R3,SOS2
IL-17A Signaling in Gastric Cells	1.53	0.154	FOS,IL17RA,MAPK10,TNF
Apelin Liver Signaling Pathway	1.53	0.154	AGT,EDN1,MAPK10,TNF
TNFR1 Signaling	1.5	0.115	CASP6,FOS,IKBKE,NAIP,NFKBID,TNF
UVB-Induced MAPK Signaling	1.5	0.115	EIF4E,FOS,MAPK10,PIK3R3,PRKCH,RPS6KA5
14-3-3-mediated Signaling	1.49	0.0866	CDKN1B,ELK1,FOS,MAPK10,MRAS,PIK3R3,PRKCH,SRC,TNF,TUBB6,YWHAG
Role of MAPK Signaling in the Pathogenesis of Influenza	1.49	0.0988	BCL2,CCL2,MAP2K3,MAP2K6,MAPK10,MRAS,PTGS2,TNF
Leukocyte Extravasation Signaling	1.48	0.0777	CLDN4,ICAM1,MAPK10,MMP1,MMP15,MMP19,PIK3R3,PRKCH,SELPLG,SRC,TEC,TIMP3,TXK,VASP,VCL
Prostate Cancer Signaling	1.47	0.0893	AR,BCL2,CCND1,CDKN1B,HDAC7,HDAC9,MRAS,NFKBID,PIK3R3,SOS2
IL-17A Signaling in Airway Cells	1.47	0.104	IKBKE,IL17RA,IL6,MAPK10,NFKBID,PIK3R3,TRAF3IP2
Adenosine Nucleotides Degradation II	1.46	0.188	ACP3,NT5E,PNP
Glycoaminoglycan-protein Linkage Region Biosynthesis	1.42	0.286	B3GALT6,XYLT1
FGF Signaling	1.41	0.0952	GAB1,MAP2K3,MAP2K6,MAPKAPK2,PIK3R3,PTPN6,RPS6KA5,SOS2
Regulation of Actin-based Motility by Rho	1.39	0.0862	ITGA5,ITGA9,ITGAV,ITGB3,ITGB8,LIMK1,MYLK,RHOBTB1,RHOBTB2,RND3
Natural Killer Cell Signaling	1.38	0.0754	CD244,FYN,KLRC2,LIMK1,MAP2K3,MAP3K12,MRAS,NFAT5,NFATC1,PIK3R3,PTPN6,SOS2,STAT4,SYK,TNFSF10
Human Embryonic Stem Cell Pluripotency	1.37	0.0783	BMP2,BMP6,GNA12,GNA13,MRAS,PDGFA,PDGFB,PIK3R3,SMAD3,SMO,TCF7L2,TGFB3,WNT5A
MSP-RON Signaling In Macrophages Pathway	1.36	0.0855	CIITA,FOS,HLA-DMB,IKBKE,IL10,MRAS,PIK3R3,PTGS2,SOS2,TNF
Xenobiotic Metabolism Signaling	1.34	0.0692	ALDH1A2,ALDH2,CHST11,CHST15,CHST7,FMO5,GCLC,HS3ST3A1,HS3ST3B1,IL1B,IL6,MAP2K3,MAP2K6,MAP3K12,MRAS,NRIP1,PIK3R3,PRKCH,TNF,UST
Glutamine Biosynthesis I	1.34	1	GLUL
Sulfite Oxidation IV	1.34	1	SUOX
1D-myo-inositol Hexakisphosphate Biosynthesis II (Mammalian)	1.33	0.167	INPP5A,INPP5F,ITPKB
D-myo-inositol (1,3,4)-trisphosphate Biosynthesis	1.33	0.167	INPP5A,INPP5F,ITPKB
Role of NFAT in Cardiac Hypertrophy	1.32	0.0727	HDAC7,HDAC9,IGF1,IL6,MAP2K3,MAP2K6,MAPK10,MEF2D,MRAS,PIK3R3,PRKACB,PRKCH,RCAN1,SOS2,SRC,TGFB3
Sphingomyelin Metabolism	1.31	0.25	SGMS1,SGMS2
Sirtuin Signaling Pathway	1.3	0.0685	ABCA1,ACSS2,ATG4C,ATP5F1D,DOT1L,DUSP6,FOXO3,HSF1,MYC,PCK2,POLR1A,POLR1C,POLR3D,PPARA,PPARG,PPIF,TIMM17A,TIMM22,TNF,TOMM40
Heparan Sulfate Biosynthesis (Late Stages)	1.3	0.0959	CHST11,CHST15,CHST7,EXTL2,HS3ST3A1,HS3ST3B1,UST
MSP-RON Signaling In Cancer Cells Pathway	1.27	0.0797	CCND1,FOS,MRAS,MYC,PIK3R3,PLAUR,SOS2,SRC,TCF7L2,VEGFA,YWHAG
Xenobiotic Metabolism CAR Signaling Pathway	1.27	0.0741	ALDH1A2,ALDH2,CHST11,CHST15,CHST7,FMO5,HS3ST3A1,HS3ST3B1,MAP2K3,MAP2K6,NRIP1,PRKCH,SRC,UST
Purine Nucleotides Degradation II (Aerobic)	1.27	0.158	ACP3,NT5E,PNP
Th1 and Th2 Activation Pathway	1.27	0.0756	ACVR1B,BHLHE41,HLA-DMB,ICAM1,IL10,IL6,IRF1,MAP2K6,NFATC1,NFIL3,NOTCH2,PIK3R3,STAT4
Apelin Endothelial Signaling Pathway	1.25	0.0791	CCL2,FOS,GNA12,GNA13,ICAM1,MAPK10,MEF2D,MRAS,PIK3R3,PRKCH,SMAD3
Wnt/β-catenin Signaling	1.25	0.0751	ACVR1B,CCND1,DKK2,MYC,PPARD,RARG,SMO,SRC,TCF7L2,TGFB3,TLE1,TLE3,WNT5A
Necroptosis Signaling Pathway	1.23	0.0764	CASP1,DAPK1,GLUL,PELI1,PGAM5,PPIF,TIMM17A,TIMM22,TNF,TNFRSF10A,TNFSF10,TOMM40
PFKFB4 Signaling Pathway	1.23	0.109	MAP2K3,MAP2K6,PRKACB,RPS6KA5,TGFB3
IL-23 Signaling Pathway	1.23	0.109	IL1B,PIK3R3,RUNX1,STAT4,TNF
RhoA Signaling	1.22	0.0806	ABL2,GNA12,GNA13,IGF1,LIMK1,MYLK,PLD1,RHPN2,RND3,SEPTIN14
IL-2 Signaling	1.22	0.0984	ELK1,FOS,MRAS,PIK3R3,SOS2,SYK
Epithelial Adherens Junction Signaling	1.22	0.0759	ACVR1B,JUP,LMO7,MAGI1,MRAS,MYO10,NOTCH2,RAPGEF1,SRC,TCF7L2,TUBB6,VCL
IL-4 Signaling	1.21	0.087	HLA-DMB,INPP5F,MRAS,NFAT5,NFATC1,PIK3R3,PTPN6,SOS2
Sphingosine and Sphingosine-1-phosphate Metabolism	1.21	0.222	ACER2,SGPP1
GADD45 Signaling	1.21	0.15	ATM,CCND1,PCNA
Fatty Acid α-oxidation	1.21	0.15	ALDH1A2,ALDH2,PTGS2
Hereditary Breast Cancer Signaling	1.2	0.0775	ATM,CCND1,CDK6,HDAC7,HDAC9,MRAS,MRE11,PIK3R3,POLR2A,POLR2H,SMARCA2
cAMP-mediated signaling	1.19	0.0699	AKAP11,AKAP3,CXCR2,DUSP1,DUSP4,DUSP6,FFAR3,FICD,GDE1,GDPD1,P2RY13,PDE8A,PDE9A,PRKACB,RGS18,SRC
Ferroptosis Signaling Pathway	1.19	0.0794	ABCA1,ACSL4,DPP4,EMP1,GCLC,HSPB1,MRAS,SAT1,SLC39A14,SLC39A8
mTOR Signaling	1.19	0.0708	DDIT4,EIF3J,EIF4E,MRAS,PIK3R3,PLD1,PLD4,PRKCH,PRR5,RHOBTB1,RHOBTB2,RND3,RPS25,RPS6KA5,VEGFA
CREB Signaling in Neurons	1.18	0.0598	ADGRA3,ADGRD1,ADGRE2,ADGRE5,BMP6,CALCR,CX3CR1,EDNRA,EDNRB,ELK1,FFAR2,FFAR3,FFAR4,GNA12,GNA13,GPR141,GPR155,GPR18,GPR3,GPR33,GPR68,GPR84,HRH1,IGF1,LGR4,MRAS,P2RY13,PDGFB,PIK3R3,POLR2A,POLR2H,PRKACB,PRKCH,SMO,SOS2,VEGFA
Regulation of the Epithelial-Mesenchymal Transition Pathway	1.18	0.0718	EGR1,GAB1,MAP2K3,MAP2K6,MRAS,NOTCH2,PIK3R3,SMAD3,SMO,SOS2,TCF7L2,TGFB3,WNT5A,ZEB1
VDR/RXR Activation	1.17	0.0897	CDKN1B,CEBPB,NCOA2,PDGFA,PPARD,PRKCH,THBD
NF-κB Activation by Viruses	1.17	0.0897	IKBKE,ITGAV,ITGB3,MRAS,NFKBID,PIK3R3,PRKCH
Non-Small Cell Lung Cancer Signaling	1.17	0.0851	CCND1,CDK6,FOXO3,HDAC7,HDAC9,MRAS,PIK3R3,SOS2
4-1BB Signaling in T Lymphocytes	1.16	0.118	IKBKE,MAPK10,NFKBID,TRAF1
Inhibition of Angiogenesis by TSP1	1.16	0.118	FYN,MAPK10,THBS1,VEGFA
Putrescine Degradation III	1.16	0.143	ALDH1A2,ALDH2,SAT1
Regulation of eIF4 and p70S6K Signaling	1.16	0.0726	AGO2,EIF2S1,EIF3J,EIF4E,ITGA5,ITGA9,ITGAV,ITGB3,ITGB8,MRAS,PIK3R3,RPS25,SOS2
IL-3 Signaling	1.15	0.0886	ELK1,FOS,MRAS,PIK3R3,PRKCH,PTPN6,RAPGEF1
Estrogen-Dependent Breast Cancer Signaling	1.15	0.0886	CCND1,ELK1,FOS,IGF1,MRAS,PIK3R3,SRC
FLT3 Signaling in Hematopoietic Progenitor Cells	1.13	0.0875	EIF4E,ELK1,MRAS,PIK3R3,RPS6KA5,SOS2,STAT4
Chemokine Signaling	1.13	0.0875	CCL2,CCL24,CCL7,FOS,LIMK1,MRAS,SRC
Activation of IRF by Cytosolic Pattern Recognition Receptors	1.11	0.0923	IKBKE,IL10,IL6,MAPK10,NFKBID,TNF
Estrogen Receptor Signaling	1.09	0.0619	AGT,ATP5F1D,BCL2,CCND1,EIF4E,FOS,FOXO3,GNA12,GNA13,IGF1,LIMK1,MMP1,MMP15,MMP19,MRAS,MYC,NCOA2,NRIP1,PCNA,PIK3R3,PRKACB,PRKCH,SOS2,SRC,VEGFA
Amyotrophic Lateral Sclerosis Signaling	1.08	0.0783	BCL2,BCL2L1,CASP1,GLUL,IGF1,NAIP,PIK3R3,RNF19A,VEGFA
UVC-Induced MAPK Signaling	1.08	0.098	FOS,MAPK10,MRAS,PRKCH,SRC
Ethanol Degradation IV	1.06	0.13	ACSS2,ALDH1A2,ALDH2
Superpathway of Methionine Degradation	1.05	0.108	AHCYL2,CDO1,MAT2A,SUOX
Factors Promoting Cardiogenesis in Vertebrates	1.05	0.0728	ACVR1B,BMP2,BMP6,CCND1,MAPK10,MYC,PRKCH,SMO,TCF7L2,TGFB3,WNT5A
Asparagine Degradation I	1.05	0.5	ASRGL1
Epoxysqualene Biosynthesis	1.05	0.5	SQLE
All-trans-decaprenyl Diphosphate Biosynthesis	1.05	0.5	PDSS1
Taurine Biosynthesis	1.05	0.5	CDO1
Xanthine and Xanthosine Salvage	1.05	0.5	PNP
Androgen Signaling	1.04	0.071	AR,CCND1,GNA12,GNA13,MRAS,NCOA2,POLR2A,POLR2H,PRKACB,PRKCH,SMAD3,SRC
EIF2 Signaling	1.03	0.067	AGO2,ATF3,BCL2,CCND1,EIF2S1,EIF3J,EIF4E,MRAS,MYC,PIK3R3,PPP1R15A,RPL7A,RPS25,SOS2,VEGFA
GNRH Signaling	1.03	0.0691	EGR1,ELK1,FOS,HBEGF,MAP2K3,MAP2K6,MAP3K12,MAPK10,MRAS,PRKACB,PRKCH,SOS2,SRC
NGF Signaling	1.03	0.0763	ELK1,GAB1,IKBKE,MAP3K12,MAPK10,MRAS,PIK3R3,RPS6KA5,SOS2
Tumoricidal Function of Hepatic Natural Killer Cells	1.02	0.125	CASP6,ICAM1,SERPINB9
Role of Cytokines in Mediating Communication between Immune Cells	0.996	0.0926	IL10,IL1B,IL1RN,IL6,TNF
Assembly of RNA Polymerase I Complex	0.987	0.167	POLR1A,POLR1C
Hematopoiesis from Multipotent Stem Cells	0.987	0.167	CSF1,KITLG
NAD biosynthesis II (from tryptophan)	0.987	0.167	KMO,TDO2
Inhibition of Matrix Metalloproteases	0.987	0.103	MMP1,MMP15,MMP19,TIMP3
BER pathway	0.987	0.167	PCNA,POLB
Xenobiotic Metabolism AHR Signaling Pathway	0.979	0.0805	ALDH1A2,ALDH2,IL1B,IL6,NCOA2,NRIP1,TNF
Virus Entry via Endocytic Pathways	0.975	0.0769	FYN,ITGA5,ITGB3,ITGB8,MRAS,PIK3R3,PRKCH,SRC
Cardiac β-adrenergic Signaling	0.975	0.069	AKAP11,AKAP3,FICD,GDE1,GDPD1,GNA12,GNA13,MRAS,PDE8A,PDE9A,PPP1R14C,PRKACB
Lymphotoxin β Receptor Signaling	0.967	0.0909	BCL2L1,IKBKE,NFKBID,PIK3R3,TRAF1
Clathrin-mediated Endocytosis Signaling	0.963	0.0674	EPHB2,IGF1,ITGA5,ITGB3,ITGB8,MYO1E,NUMB,PCYOX1,PDGFA,PDGFB,PIK3R3,SRC,VEGFA
Ephrin B Signaling	0.947	0.0833	EPHB2,GNA12,GNA13,LIMK1,MRAS,RGS3
Endocannabinoid Developing Neuron Pathway	0.943	0.0732	CCND1,CDKN1B,MAP2K3,MAP2K6,MAPK10,MRAS,PIK3R3,PRKACB,SRC
NAD Phosphorylation and Dephosphorylation	0.928	0.154	ACP3,NADK
UDP-N-acetyl-D-galactosamine Biosynthesis II	0.928	0.154	GNPNAT1,UAP1
NAD Salvage Pathway II	0.903	0.111	ACP3,NMRK1,NT5E
Guanine and Guanosine Salvage I	0.879	0.333	PNP
5-aminoimidazole Ribonucleotide Biosynthesis I	0.879	0.333	PPAT
Glutathione Biosynthesis	0.879	0.333	GCLC
Adenine and Adenosine Salvage I	0.879	0.333	PNP
S-adenosyl-L-methionine Biosynthesis	0.879	0.333	MAT2A
DNA Double-Strand Break Repair by Homologous Recombination	0.876	0.143	ATM,MRE11
DNA Double-Strand Break Repair by Non-Homologous End Joining	0.876	0.143	ATM,MRE11
Fatty Acid Activation	0.876	0.143	ACSL4,SLC27A2
Phenylalanine Degradation IV (Mammalian, via Side Chain)	0.876	0.143	ALDH2,SLC27A2
Oncostatin M Signaling	0.873	0.093	ELK1,MMP1,MRAS,TIMP3
MIF Regulation of Innate Immunity	0.845	0.0909	FOS,MAPK10,NFKBID,PTGS2
Antiproliferative Role of Somatostatin Receptor 2	0.845	0.0779	CDKN1B,ELK1,MRAS,PIK3R3,PTPN6,SRC
Antioxidant Action of Vitamin C	0.842	0.0714	IKBKE,MAPK10,NFKBID,PLD1,PLD4,SLC2A14,SLC2A3,TNF
Superpathway of Cholesterol Biosynthesis	0.833	0.103	CYP51A1,MSMO1,SQLE
Role of p14/p19ARF in Tumor Suppression	0.833	0.103	PIK3R3,POLR3D,SENP3
Corticotropin Releasing Hormone Signaling	0.827	0.0671	ELK1,FOS,JUND,MEF2D,NR4A1,PRKACB,PRKCH,PTGS2,SMO,VEGFA
Telomere Extension by Telomerase	0.827	0.133	MRE11,PINX1
fMLP Signaling in Neutrophils	0.824	0.0687	ELK1,GNA12,GNA13,MRAS,NFAT5,NFATC1,NFKBID,PIK3R3,PRKCH
Huntington's Disease Signaling	0.818	0.0605	ATP5F1D,BCL2L1,CASP1,CASP5,CASP6,HDAC7,HDAC9,IGF1,PIK3R3,POLR2A,POLR2H,PRKCH,RASA1,SGK1,SNAP25,SOS2,TGM2
p70S6K Signaling	0.812	0.0682	AGT,MRAS,PIK3R3,PLD1,PRKCH,SOS2,SRC,SYK,YWHAG
Thrombopoietin Signaling	0.788	0.0794	FOS,MRAS,MYC,PIK3R3,PRKCH
Type II Diabetes Mellitus Signaling	0.788	0.0658	ACSL4,CEBPB,IKBKE,MAPK10,NFKBID,PIK3R3,PPARG,PRKCH,SLC27A2,TNF
UVA-Induced MAPK Signaling	0.783	0.0714	ATM,BCL2L1,FOS,MAPK10,MRAS,PIK3R3,RPS6KA5
Triacylglycerol Biosynthesis	0.772	0.0851	ABHD5,LCLAT1,LPIN2,PLPP4
PRPP Biosynthesis I	0.764	0.25	PRPS1
Spermine and Spermidine Degradation I	0.764	0.25	SAT1
Phenylethylamine Degradation I	0.764	0.25	ALDH2
L-cysteine Degradation I	0.764	0.25	CDO1
Acetate Conversion to Acetyl-CoA	0.764	0.25	ACSS2
Xenobiotic Metabolism PXR Signaling Pathway	0.757	0.0625	ALDH1A2,ALDH2,CHST11,CHST15,CHST7,HS3ST3A1,HS3ST3B1,NRIP1,PPP1R14C,PRKACB,PRKCH,UST
Airway Pathology in Chronic Obstructive Pulmonary Disease	0.754	0.0678	CCL2,IL1B,IL6,MMP1,TGFB3,TNF,TNFSF10,TNFSF15
Airway Inflammation in Asthma	0.742	0.0938	CCL2,IL10,TGFB3
Ethanol Degradation II	0.742	0.0938	ACSS2,ALDH1A2,ALDH2
Neuropathic Pain Signaling In Dorsal Horn Neurons	0.738	0.0693	ELK1,FOS,KCNN4,PIK3R3,PRKACB,PRKCH,SRC
Histamine Degradation	0.738	0.118	ALDH1A2,ALDH2
Gαi Signaling	0.733	0.0652	CXCR2,FFAR3,GNA12,GNA13,MRAS,P2RY13,PRKACB,SOS2,SRC
Role of NANOG in Mammalian Embryonic Stem Cell Pluripotency	0.726	0.0667	BMP2,BMP6,GAB1,MRAS,PIK3R3,SMO,SOS2,WNT5A
TR/RXR Activation	0.724	0.0714	G6PC,KLF9,NCOA2,PFKP,PIK3R3,THRA
VEGF Family Ligand-Receptor Interactions	0.724	0.0714	FOS,MRAS,PIK3R3,PRKCH,SOS2,VEGFA
RhoGDI Signaling	0.717	0.0605	GNA12,GNA13,ITGA5,ITGA9,ITGAV,ITGB3,ITGB8,LIMK1,MRAS,RHOBTB1,RHOBTB2,RND3,SRC
FcγRIIB Signaling in B Lymphocytes	0.708	0.0706	BLNK,FCGR2B,MAPK10,MRAS,PIK3R3,SYK
Melanoma Signaling	0.706	0.08	CCND1,MITF,MRAS,PIK3R3
Cell Cycle: G2/M DNA Damage Checkpoint Regulation	0.706	0.08	ATM,FBXL5,SKP2,YWHAG
γ-linolenate Biosynthesis II (Animals)	0.699	0.111	ACSL4,SLC27A2
Mitochondrial L-carnitine Shuttle Pathway	0.699	0.111	ACSL4,SLC27A2
Mouse Embryonic Stem Cell Pluripotency	0.695	0.0673	ID1,MRAS,MYC,PIK3R3,SMO,SOS2,TCF7L2
Role of JAK2 in Hormone-like Cytokine Signaling	0.69	0.0882	PTPN6,SH2B2,SH2B3
Inhibition of ARE-Mediated mRNA Degradation Pathway	0.684	0.0621	AGO2,MAPKAPK2,PRKACB,TNF,TNFSF10,TNFSF15,TNFSF18,YWHAG,ZFP36,ZFP36L2
Arsenate Detoxification I (Glutaredoxin)	0.678	0.2	PNP
Protein Citrullination	0.678	0.2	PADI2
Tetrapyrrole Biosynthesis II	0.678	0.2	ALAS1
Lysine Degradation V	0.678	0.2	PIPOX
Role of JAK1 and JAK3 in γc Cytokine Signaling	0.676	0.0725	BLNK,FES,MRAS,PIK3R3,SYK
BMP signaling pathway	0.676	0.069	BMP2,BMP6,GREM1,MAPK10,MRAS,PRKACB
Nucleotide Excision Repair Pathway	0.666	0.0857	ERCC1,POLR2A,POLR2H
AMPK Signaling	0.648	0.0579	CCND1,FOXO3,GNA12,GNA13,MAP2K3,MRAS,PCK2,PFKP,PIK3R3,PPAT,PPM1K,PPM1M,PRKACB,SMARCA2
Retinoate Biosynthesis I	0.64	0.0833	ALDH1A2,BMP2,DHRS3
Basal Cell Carcinoma Signaling	0.627	0.0694	BMP2,BMP6,SMO,TCF7L2,WNT5A
Cell Cycle Regulation by BTG Family Proteins	0.618	0.0811	BTG2,CCND1,E2F8
Crosstalk between Dendritic Cells and Natural Killer Cells	0.618	0.0659	CD83,IL6,TLN2,TLR7,TNF,TNFSF10
G Beta Gamma Signaling	0.614	0.062	GNA12,GNA13,HBEGF,MRAS,PRKACB,PRKCH,SOS2,SRC
Chondroitin and Dermatan Biosynthesis	0.609	0.167	CHSY1
GDP-mannose Biosynthesis	0.609	0.167	PMM2
Notch Signaling	0.597	0.0789	DTX4,NOTCH2,NUMB
Hypoxia Signaling in the Cardiovascular System	0.597	0.0676	ATM,EDN1,NFKBID,UBE2J1,VEGFA
Cell Cycle Control of Chromosomal Replication	0.592	0.0714	CDK17,CDK6,PCNA,PRIM1
Role of MAPK Signaling in Promoting the Pathogenesis of Influenza	0.592	0.0625	BCL2,MAP2K3,MAP2K6,MAPK10,MRAS,NFKBID,PTGS2
Role of CHK Proteins in Cell Cycle Checkpoint Control	0.575	0.0702	ATM,E2F8,MRE11,PCNA
CDP-diacylglycerol Biosynthesis I	0.572	0.0909	ABHD5,LCLAT1
Pyrimidine Deoxyribonucleotides De Novo Biosynthesis I	0.572	0.0909	CMPK2,RRM2B
Methionine Degradation I (to Homocysteine)	0.572	0.0909	AHCYL2,MAT2A
MSP-RON Signaling Pathway	0.558	0.069	CCL2,CSF1,PIK3R3,TNF
Cancer Drug Resistance By Drug Efflux	0.558	0.069	FOXO3,MRAS,PIK3R3,PTGS2
IL-15 Signaling	0.553	0.0649	BCL2L1,MRAS,MYC,PIK3R3,SYK
Angiopoietin Signaling	0.553	0.0649	IKBKE,MRAS,NFKBID,PIK3R3,RASA1
Phosphatidylcholine Biosynthesis I	0.551	0.143	PCYT1A
NAD Salvage Pathway III	0.551	0.143	NMRK1
Adenine and Adenosine Salvage III	0.551	0.143	PNP
Ceramide Degradation	0.551	0.143	ACER2
CCR3 Signaling in Eosinophils	0.55	0.0593	CCL24,GNA12,GNA13,LIMK1,MRAS,MYLK,PIK3R3,PRKCH
Apelin Cardiac Fibroblast Signaling Pathway	0.544	0.087	IL6,TGFB3
White Adipose Tissue Browning Pathway	0.541	0.0588	CEBPB,GPBAR1,PPARA,PPARG,PRKACB,RARG,THRA,VEGFA
Th2 Pathway	0.53	0.0584	ACVR1B,BHLHE41,HLA-DMB,ICAM1,IL10,NOTCH2,PIK3R3,STAT4
NRF2-mediated Oxidative Stress Response	0.529	0.0549	ABCC4,DNAJB5,ENC1,FOS,FOSL1,GCLC,JUNB,JUND,MAP2K3,MAP2K6,MRAS,PIK3R3,PRKCH
Retinoic acid Mediated Apoptosis Signaling	0.527	0.0667	IRF1,RARG,TNFRSF10A,TNFSF10
Phosphatidylglycerol Biosynthesis II (Non-plastidic)	0.519	0.0833	ABHD5,LCLAT1
Tryptophan Degradation III (Eukaryotic)	0.519	0.0833	KMO,TDO2
Cysteine Biosynthesis III (mammalia)	0.519	0.0833	AHCYL2,MAT2A
Role of BRCA1 in DNA Damage Response	0.513	0.0625	ATM,BRIP1,E2F8,MRE11,SMARCA2
Purine Ribonucleosides Degradation to Ribose-1-phosphate	0.503	0.125	PNP
BEX2 Signaling Pathway	0.5	0.0617	BCL2,CCND1,MAPK10,TCF7L2,VEGFA
Polyamine Regulation in Colon Cancer	0.498	0.0645	MYC,PPARG,SAT1,TCF7L2
Role of JAK family kinases in IL-6-type Cytokine Signaling	0.495	0.08	IL6,MAPK10
Tryptophan Degradation X (Mammalian, via Tryptamine)	0.495	0.08	ALDH1A2,ALDH2
Gαs Signaling	0.492	0.0579	ADD3,ELK1,GNA12,GNA13,MRAS,PRKACB,SRC
G Protein Signaling Mediated by Tubby	0.481	0.0682	GNA12,GNA13,MRAS
Xenobiotic Metabolism General Signaling Pathway	0.474	0.0559	GCLC,MAP2K3,MAP2K6,MAP3K12,MRAS,PIK3R3,PPARA,PRKCH
Wnt/Ca+ pathway	0.47	0.0625	NFAT5,NFATC1,SMO,WNT5A
Aldosterone Signaling in Epithelial Cells	0.466	0.0549	DNAJB5,DUSP1,HSPB1,KCNMB4,PIK3R3,PRKCH,SGK1,SMO,SOS2
Pathogenesis of Multiple Sclerosis	0.462	0.111	CCL3
Heme Biosynthesis II	0.462	0.111	ALAS1
Salvage Pathways of Pyrimidine Deoxyribonucleotides	0.462	0.111	UPP1
Insulin Secretion Signaling Pathway	0.456	0.0522	AGO2,EIF2S1,EIF4E,FGR,FYN,PIK3R3,PRKACB,PRKCH,RPS6KA5,SLC2A14,SLC2A3,SNAP25,SRC,STAT4
Role of Oct4 in Mammalian Embryonic Stem Cell Pluripotency	0.45	0.0652	CASP6,JARID2,PHC1
Apelin Pancreas Signaling Pathway	0.45	0.0652	MAPK10,PIK3R3,PRKACB
Synaptogenesis Signaling Pathway	0.44	0.0513	EPHB2,FGR,FYN,LIMK1,MARCKS,MRAS,PIK3R3,PRKACB,RAPGEF1,SGTA,SNAP25,SOS2,SRC,SYT1,THBS1,TIAM1
Ephrin A Signaling	0.434	0.0638	FYN,LIMK1,PIK3R3
Telomerase Signaling	0.433	0.0561	HDAC7,HDAC9,MRAS,MYC,PIK3R3,SOS2
Thrombin Signaling	0.429	0.0524	ELK1,GNA12,GNA13,MRAS,MYLK,PIK3R3,PRKCH,RHOBTB1,RHOBTB2,RND3,SRC
Prostanoid Biosynthesis	0.426	0.1	PTGS2
Ketolysis	0.426	0.1	BDH1
Glycine Betaine Degradation	0.426	0.1	PIPOX
Apelin Muscle Signaling Pathway	0.42	0.0625	GNA12,GNA13,MRAS
P2Y Purigenic Receptor Signaling Pathway	0.418	0.0543	FOS,ITGB3,MRAS,MYC,PIK3R3,PRKACB,PRKCH
ErbB4 Signaling	0.418	0.0588	MRAS,PIK3R3,PRKCH,SOS2
Sonic Hedgehog Signaling	0.411	0.069	PRKACB,SMO
Ceramide Signaling	0.399	0.0556	BCL2,FOS,MRAS,PIK3R3,TNF
Unfolded protein response	0.399	0.0556	BCL2,CEBPB,DNAJB5,PPARG,PPP1R15A
Agrin Interactions at Neuromuscular Junction	0.395	0.0571	MAPK10,MRAS,SRC,UTRN
Dopamine Degradation	0.394	0.0667	ALDH1A2,ALDH2
Ketogenesis	0.394	0.0909	BDH1
γ-glutamyl Cycle	0.394	0.0909	GCLC
Purine Nucleotides De Novo Biosynthesis II	0.394	0.0909	PPAT
CDK5 Signaling	0.386	0.0536	CABLES1,EGR1,MAPK10,MRAS,PPP1R14C,PRKACB
Melatonin Signaling	0.374	0.0556	MAP2K3,MAP2K6,PRKACB,PRKCH
Netrin Signaling	0.374	0.0556	ABLIM1,NFAT5,NFATC1,PRKACB
GPCR-Mediated Nutrient Sensing in Enteroendocrine Cells	0.353	0.0517	FFAR2,FFAR3,FFAR4,GPBAR1,PRKACB,PRKCH
Assembly of RNA Polymerase III Complex	0.339	0.0769	POLR3D
ATM Signaling	0.335	0.0515	ATM,CBX1,MAPK10,MRE11,ZEB1
Pyrimidine Ribonucleotides Interconversion	0.331	0.0588	CMPK2,CTPS1
Oxidative Ethanol Degradation III	0.331	0.0545	ACSS2,ALDH1A2,ALDH2
Fatty Acid β-oxidation I	0.331	0.0588	ACSL4,SLC27A2
Coagulation System	0.316	0.0571	PLAUR,THBD
IL-9 Signaling	0.316	0.0571	PIK3R3,TNF
Role of IL-17A in Psoriasis	0.316	0.0714	IL17RA
Colanic Acid Building Blocks Biosynthesis	0.316	0.0714	PMM2
Noradrenaline and Adrenaline Degradation	0.316	0.0571	ALDH1A2,ALDH2
Role of Wnt/GSK-3β Signaling in the Pathogenesis of Influenza	0.314	0.0513	NCOA2,SMO,TCF7L2,WNT5A
CNTF Signaling	0.31	0.0526	MRAS,PIK3R3,RPS6KA5
MIF-mediated Glucocorticoid Regulation	0.303	0.0556	NFKBID,PTGS2
Pyrimidine Ribonucleotides De Novo Biosynthesis	0.303	0.0556	CMPK2,CTPS1
Gustation Pathway	0.298	0.0479	FICD,GDE1,GDPD1,P2RY13,PANX1,PDE8A,PDE9A,PRKACB
NER (Nucleotide Excision Repair, Enhanced Pathway)	0.288	0.0485	ERCC1,PCNA,POLR2A,POLR2H,PRIM1
Extrinsic Prothrombin Activation Pathway	0.277	0.0625	THBD
Mismatch Repair in Eukaryotes	0.277	0.0625	PCNA
Chondroitin Sulfate Degradation (Metazoa)	0.277	0.0625	CEMIP2
GP6 Signaling Pathway	0.274	0.0472	FYB1,FYN,ITGB3,PIK3R3,PRKCH,SYK
α-Adrenergic Signaling	0.267	0.0472	GNA12,GNA13,MRAS,PRKACB,PRKCH
tRNA Charging	0.267	0.0513	EARS2,MARS2
Antigen Presentation Pathway	0.267	0.0513	CIITA,HLA-DMB
Dermatan Sulfate Degradation (Metazoa)	0.259	0.0588	CEMIP2
HIPPO signaling	0.257	0.0471	PPP1R14C,SKP2,SMAD3,YWHAG
Mechanisms of Viral Exit from Host Cells	0.246	0.0488	PRKCH,VPS37C
Granzyme A Signaling	0.228	0.0526	HMGB2
DNA damage-induced 14-3-3σ Signaling	0.228	0.0526	ATM
The Visual Cycle	0.215	0.05	DHRS3
Endoplasmic Reticulum Stress Pathway	0.202	0.0476	EIF2S1
Dilated Cardiomyopathy Signaling Pathway	0	0.0411	BCL2,DSC2,GAB1,LMNA,MYO10,PRKACB
Synaptic Long Term Potentiation	0	0.031	MRAS,PPP1R14C,PRKACB,PRKCH
Synaptic Long Term Depression	0	0.0258	GNA12,GNA13,IGF1,MRAS,PRKCH
Mitochondrial Dysfunction	0	0.0294	ATP5F1D,BCL2,COX7B2,LRRK2,MAPK10
Role of RIG1-like Receptors in Antiviral Innate Immunity	0	0.0435	IKBKE,NFKBID
Role of NFAT in Regulation of the Immune Response	0	0.03	BLNK,FCGR2B,FOS,FYN,GNA12,GNA13,HLA-DMB,IKBKE,MEF2D,MRAS,NFAT5,NFATC1,NFKBID,PIK3R3,RCAN1,SOS2,SYK
CCR5 Signaling in Macrophages	0	0.0147	CCL3,FOS,GNA12,GNA13,MAPK10,MRAS,PRKCH
IL-22 Signaling	0	0.0417	MAPK10
Calcium-induced T Lymphocyte Apoptosis	0	0.00913	HLA-DMB,MEF2D,NR4A1,PRKCH
Cytotoxic T Lymphocyte-mediated Apoptosis of Target Cells	0	0.00496	BCL2,CASP6
CTLA4 Signaling in Cytotoxic T Lymphocytes	0	0.00877	FYN,PIK3R3,PTPN6,SYK
T Helper Cell Differentiation	0	0.0134	BCL6,HLA-DMB,IL10,IL6,STAT4,TNF
CD28 Signaling in T Helper Cells	0	0.0242	FOS,FYN,HLA-DMB,IKBKE,MALT1,MAPK10,NFAT5,NFATC1,NFKBID,PIK3R3,PTPN6,SYK
Dendritic Cell Maturation	0	0.0265	CD1A,CD83,FCGR2B,HLA-DMB,ICAM1,IKBKE,IL10,IL1B,IL1RN,IL6,MAPK10,NFKBID,PIK3R3,STAT4,TNF
Cellular Effects of Sildenafil (Viagra)	0	0.0268	KCNN4,MYLK,MYO10,PRKACB
Cardiomyocyte Differentiation via BMP Receptors	0	0.0435	BMP2
iCOS-iCOSL Signaling in T Helper Cells	0	0.0124	HLA-DMB,IKBKE,NFAT5,NFATC1,NFKBID,PIK3R3
Lipid Antigen Presentation by CD1	0	0.00254	CD1A
Mitotic Roles of Polo-Like Kinase	0	0.0152	PLK3
Type I Diabetes Mellitus Signaling	0	0.0205	BCL2,HLA-DMB,IKBKE,IL1B,IRF1,MAP2K3,MAP2K6,MAPK10,NFKBID,TNF
Primary Immunodeficiency Signaling	0	0.037	BLNK,CIITA
Allograft Rejection Signaling	0	0.00651	HLA-DMB,IL10,TNF
Autoimmune Thyroid Disease Signaling	0	0.00464	HLA-DMB,IL10
Graft-versus-Host Disease Signaling	0	0.0118	HLA-DMB,IL1B,IL1RN,IL6,TNF
Communication between Innate and Adaptive Immune Cells	0	0.0254	CCL3,CCL3L3,CD83,IL10,IL1B,IL1RN,IL6,TLR10,TLR5,TLR7,TLR8,TNF
Systemic Lupus Erythematosus Signaling	0	0.025	FCGR2B,FOS,IL10,IL1B,IL1RN,IL6,MRAS,NFAT5,NFATC1,PIK3R3,PIM2,PTPN6,SOS2,TLR7,TNF
Cdc42 Signaling	0	0.0235	FGD3,FOS,HLA-DMB,ITGA5,ITGA9,ITGAV,ITGB3,ITGB8,LIMK1,MAPK10,MYLK,RASA1,SRC
Phospholipase C Signaling	0	0.0399	BLNK,FCGR2B,FYN,GNA13,HDAC7,HDAC9,ITGA5,ITGA9,ITGAV,ITGB3,ITGB8,MARCKS,MEF2D,MRAS,NFAT5,NFATC1,PLD1,PLD4,PRKCH,RHOBTB1,RHOBTB2,RND3,SOS2,SRC,SYK,TGM2
Altered T Cell and B Cell Signaling in Rheumatoid Arthritis	0	0.0234	CSF1,HLA-DMB,IL10,IL1B,IL1RN,IL6,TLR10,TLR5,TLR7,TLR8,TNF
Leptin Signaling in Obesity	0	0.027	PIK3R3,PRKACB
B Cell Development	0	0.0233	HLA-DMB
Neuroprotective Role of THOP1 in Alzheimer's Disease	0	0.0254	AGT,DPP4,PRKACB
Regulation of IL-2 Expression in Activated and Anergic T Lymphocytes	0	0.0282	ELK1,FOS,FYN,IKBKE,MALT1,MAPK10,MRAS,NFAT5,NFATC1,NFKBID,SMAD3,SOS2,TGFB3
Nur77 Signaling in T Lymphocytes	0	0.0204	BCL2,HDAC7,HDAC9,HLA-DMB,MEF2D,NFATC1,NR4A1,PCNA,PRKCH,TNFSF10
PKCθ Signaling in T Lymphocytes	0	0.0224	FOS,FYN,HLA-DMB,IKBKE,MALT1,MAP3K12,MRAS,NFAT5,NFATC1,NFKBID,PIK3R3,SOS2
Role of PI3K/AKT Signaling in the Pathogenesis of Influenza	0	0.0455	NFKBID,PIK3R3,PLAC8
Antiproliferative Role of TOB in T Cell Signaling	0	0.0099	CDKN1B,SKP2,SMAD3,TGFB3
OX40 Signaling Pathway	0	0.0109	BCL2,BCL2L1,HLA-DMB,MAPK10,NFKBID
Intrinsic Prothrombin Activation Pathway	0	0.0238	THBD
Assembly of RNA Polymerase II Complex	0	0.04	POLR2A,POLR2H
Role of JAK1, JAK2 and TYK2 in Interferon Signaling	0	0.0385	PTPN6
Dopamine-DARPP32 Feedback in cAMP Signaling	0	0.0166	PPP1R14C,PRKACB,PRKCH
Gap Junction Signaling	0	0.0354	MRAS,PIK3R3,PRKACB,PRKCH,SOS2,SRC,TUBB6
Hematopoiesis from Pluripotent Stem Cells	0	0.00957	CSF1,IL10,IL6,KITLG
Transcriptional Regulatory Network in Embryonic Stem Cells	0	0.0185	ZFHX3
eNOS Signaling	0	0.0377	AQP9,PIK3R3,PRKACB,PRKCH,SLC7A1,VEGFA
nNOS Signaling in Neurons	0	0.0213	PRKCH
Bupropion Degradation	0	0.04	CYP51A1
Nicotine Degradation III	0	0.0345	CYP51A1,FMO5
Glutathione Redox Reactions I	0	0.04	GPX3
Melatonin Degradation I	0	0.0164	CYP51A1
Triacylglycerol Degradation	0	0.0392	ABHD6,LPL
Phospholipases	0	0.0455	LPL,PLD1,PLD4
Estrogen Biosynthesis	0	0.0227	CYP51A1
Nicotine Degradation II	0	0.0303	CYP51A1,FMO5
Serotonin Degradation	0	0.0294	ALDH1A2,ALDH2
Retinol Biosynthesis	0	0.0455	DHRS3,LPL
Glycolysis I	0	0.0385	PFKP
Superpathway of Melatonin Degradation	0	0.0152	CYP51A1
Stearate Biosynthesis I (Animals)	0	0.0377	ACSL4,SLC27A2
Acetone Degradation I (to Methylglyoxal)	0	0.0312	CYP51A1
Remodeling of Epithelial Adherens Junctions	0	0.0441	SRC,TUBB6,VCL
Tec Kinase Signaling	0	0.0432	FGR,FOS,FYN,GNA12,GNA13,ITGA5,ITGA9,ITGAV,ITGB3,ITGB8,MAPK10,MRAS,PIK3R3,PRKCH,RHOBTB1,RHOBTB2,RND3,SRC,STAT4,TEC,TNF,TNFRSF10A,TNFSF10,TXK
Vitamin-C Transport	0	0.0417	SLC2A3
Oxidative Phosphorylation	0	0.0183	ATP5F1D,COX7B2
SAPK/JNK Signaling	0	0.025	DUSP4,ELK1,GAB1,GNA12,GNA13,MAP3K12,MAPK10,MRAS,NFATC1,PIK3R3,SH2D2A,SOS2
Nitric Oxide Signaling in the Cardiovascular System	0	0.042	PIK3R3,PRKACB,PRKCH,SLC7A1,VEGFA
Protein Ubiquitination Pathway	0	0.0327	DNAJB5,ELOC,HSPB1,SKP2,SMO,UBE2J1,USP10,USP2,USP36
Amyloid Processing	0	0.0196	PRKACB
GABA Receptor Signaling	0	0.0382	GABRE,GNA12,GNA13,KCNN4,MRAS
Phototransduction Pathway	0	0.0185	PRKACB
Dopamine Receptor Signaling	0	0.039	NCS1,PPP1R14C,PRKACB
Glutamate Receptor Signaling	0	0.0455	GLUL,HOMER1,SLC1A3
NF-κB Signaling	0	0.031	BMP2,IL1B,IL1R2,IL1RN,IRAK3,MALT1,MAP2K6,MRAS,NFKBID,PELI1,PIK3R3,PRKACB,TLR10,TLR5,TLR7,TLR8,TNF
T Cell Receptor Signaling	0	0.0405	CDKN1B,DUSP5,DUSP6,ELK1,FOS,FOXO3,FYB1,FYN,HLA-DMB,ICAM1,IKBKE,MALT1,MAP2K3,MAP2K6,MRAS,NFAT5,NFATC1,PIK3R3,PTPN6,PTPN7,RASA1,SOS2,TCF7L2,TNF
GPCR-Mediated Integration of Enteroendocrine Signaling Exemplified by an L Cell	0	0.0274	GAL,PRKACB
Phagosome Maturation	0	0.044	CTSK,CTSV,RAB7B,SNAP25,TUBB6,VPS37B,VPS37C
Th17 Activation Pathway	0	0.0195	IL10,IL1B,IL6,IRAK2,IRAK3,NFAT5,NFATC1,RUNX1,STAT4
SPINK1 Pancreatic Cancer Pathway	0	0.0167	SMAD3
SPINK1 General Cancer Pathway	0	0.0435	IL6,MRAS,PIK3R3
Endocannabinoid Neuronal Synapse Pathway	0	0.034	ABHD6,DAGLA,MAPK10,PRKACB,PTGS2
Apelin Adipocyte Signaling Pathway	0	0.0349	GPX3,MAPK10,PRKACB
Apelin Cardiomyocyte Signaling Pathway	0	0.0404	MAPK10,MYLK,PIK3R3,PRKCH
BAG2 Signaling Pathway	0	0.0238	MAPKAPK2,MYC
FAT10 Signaling Pathway	0	0.0179	TNF
T Cell Exhaustion Signaling Pathway	0	0.0312	ACVR1B,BCL6,FOS,FOXP1,HLA-DMB,IL10,IL6,MAPK10,MRAS,NFAT5,NFATC1,PDCD1LG2,PIK3R3,PTPN6,SMAD3,STAT4,VEGFA
Systemic Lupus Erythematosus In T Cell Signaling Pathway	0	0.0324	BCL6,CASP1,CASP5,CASP6,FOS,GNA12,GNA13,HLA-DMB,IL10,IL6,MAP2K3,MAP2K6,MRAS,PIK3R3,RHOBTB1,RHOBTB2,RND3,SELPLG,SOS2,SYK
Regulation Of The Epithelial Mesenchymal Transition In Development Pathway	0	0.0345	SMO,TCF7L2,WNT5A
Kinetochore Metaphase Signaling Pathway	0	0.019	CENPP,PPP1R14C
Coronavirus Replication Pathway	0	0.0222	TUBB6
Calcium Signaling	0	0.0417	HDAC7,HDAC9,MEF2D,MYO10,NFAT5,NFATC1,PRKACB,RCAN1,SLC8B1
Eicosanoid Signaling	0	0.0149	PTGS2
