# Supplementary figures and images for: C5a Activates a Pro-Inflammatory Gene Expression Profile in Human Gaucher iPSC-Derived Macrophages
Source: MDPI journal article supplement (doi:10.3390/ijms22189912), 2021-09-14

**Control Macrophages**

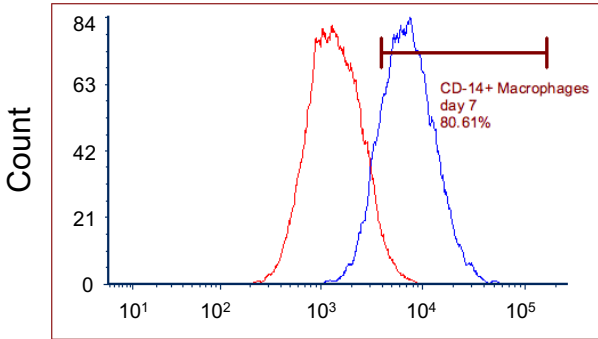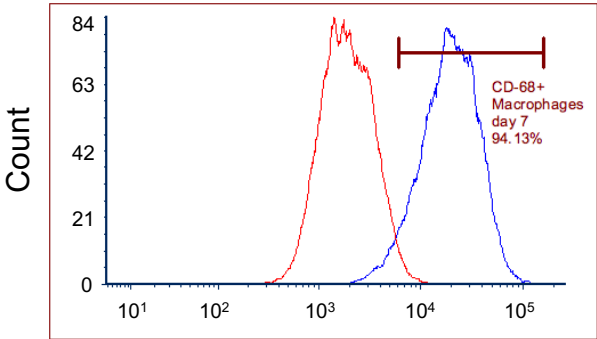

**GD Macrophages**

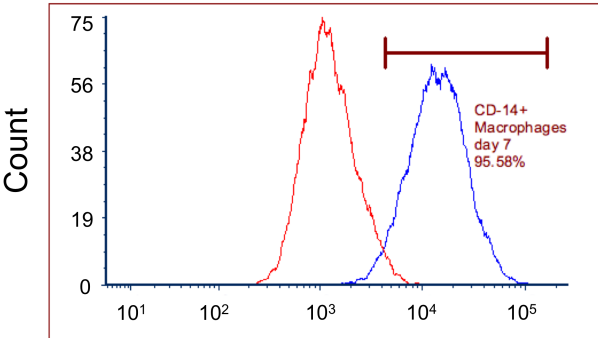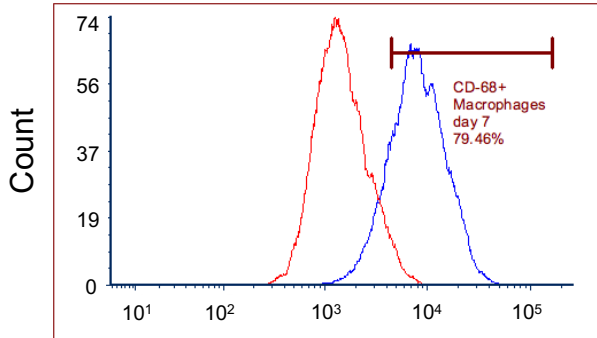

Supplement: s1 [file s1]

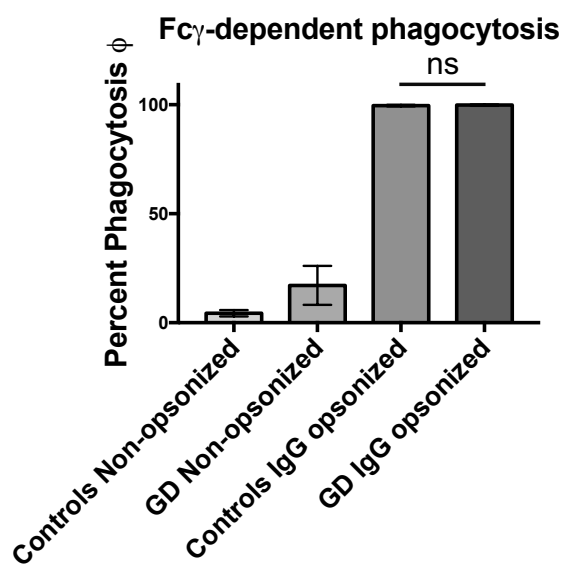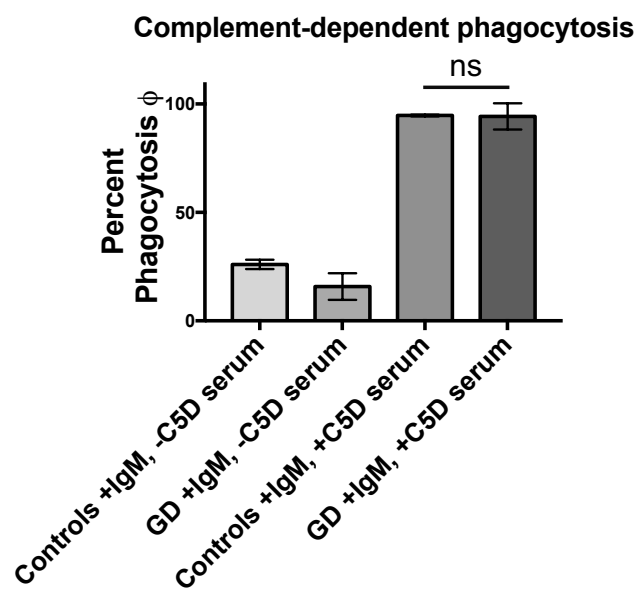

Supplement: s1 [file s1]
